# Supplementary material for: Whole-Genome Inter-Sex Variation in Russian Sturgeon (Acipenser gueldenstaedtii)
Source: MDPI journal article supplement (doi:10.3390/ijms23169469), 2022-08-22
Supplement: s1 [file s1]

Figure S1

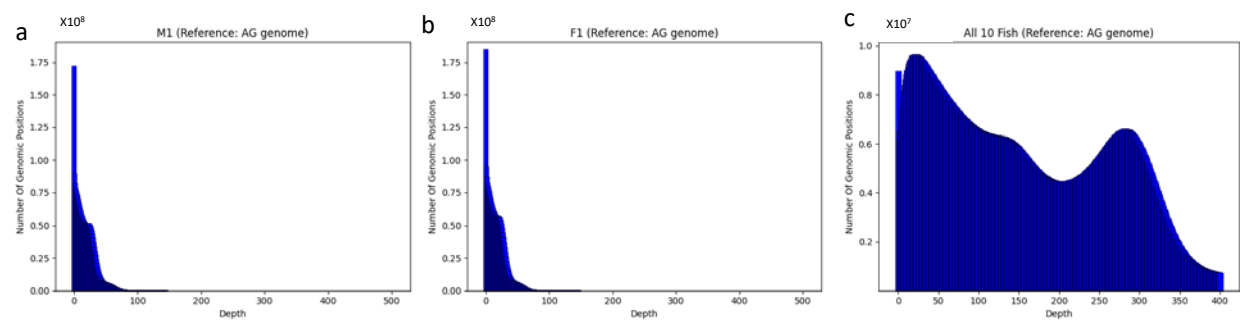

Figure S1: Distributions of sequencing depth over all genome positions when reads are aligned to the AG genome: (a) Male M1; (b) Female F1; (c) All samples combined.
