# Supplementary material for: Whole-Genome Inter-Sex Variation in Russian Sturgeon (Acipenser gueldenstaedtii)
Source: MDPI journal article supplement (doi:10.3390/ijms23169469), 2022-08-22

**Figure S2.** Distributions of sequencing depth over all genome positions when reads are aligned to the male or female AR genomes (a-f).

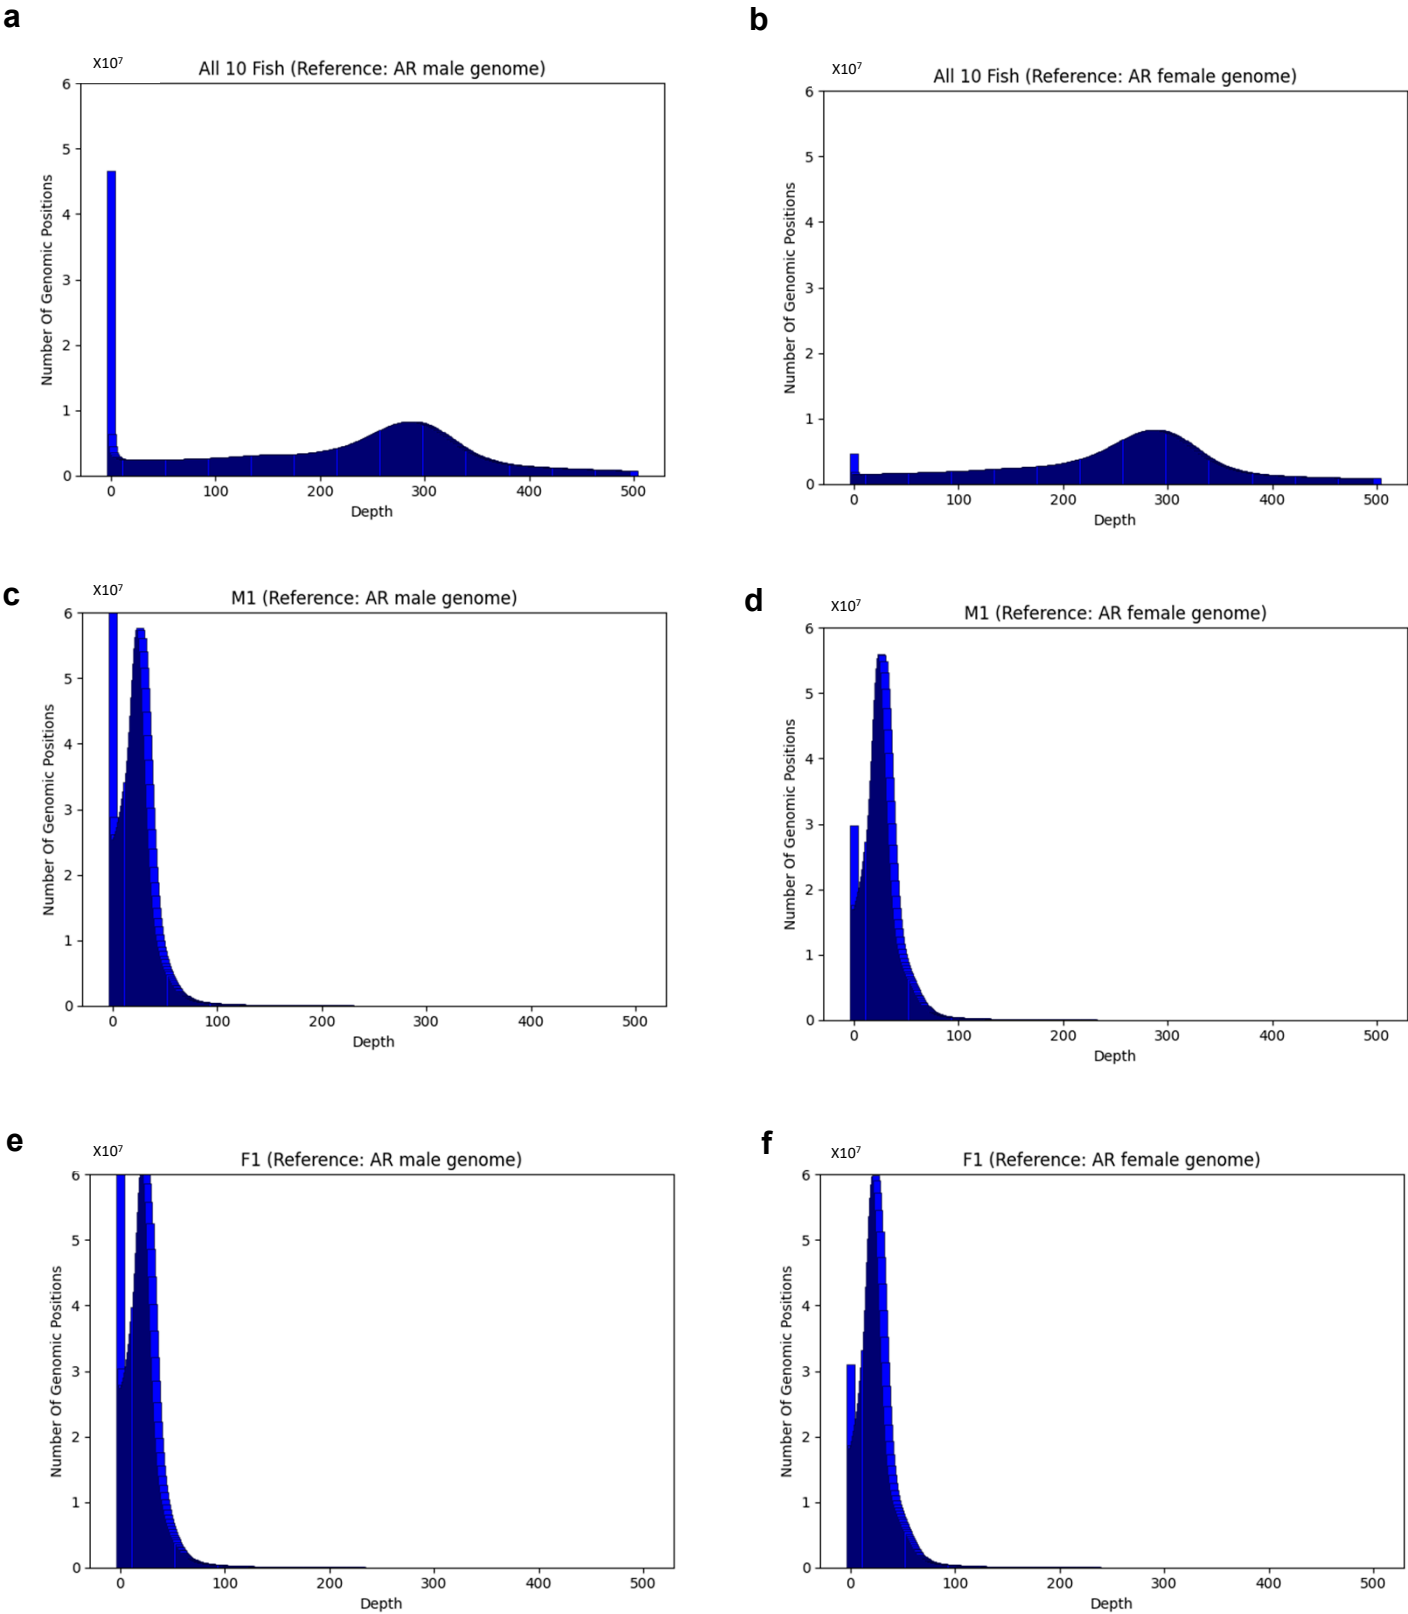

Supplement: s1 [file s1]
