# Supplementary material for: Whole-Genome Inter-Sex Variation in Russian Sturgeon (Acipenser gueldenstaedtii)
Source: Int J Mol Sci. 2022 Aug 22;23(16):9469. doi: 10.3390/ijms23169469 (PMC9409348; doi:10.3390/ijms23169469)
Supplement: Supplementary file 1 [file ijms-23-09469-s001.zip › Tables_ver5.xlsx]

## Sheet: Table S1
Assembly statistics
Number of Contigs	3393603	3.39 Mb
Total size (bp)	2389722506	2389.72 Mb
min size (bp)	200
max size (bp)	36607
average (bp)	704
N50 (bp)	1043

## Sheet: Table S2
BUSCO output
		C:21.4%[S:19.6%,D:1.8%],F:15.2%,M:63.4%,n:3640
Complete BUSCOs (C)	780
Complete and single-copy BUSCOs (S)	714
Complete and duplicated BUSCOs (D)	66
Fragmented BUSCOs (F)	555
Missing BUSCOs (M)	2305
Total BUSCO groups searched	3640

## Sheet: Table S3
A. Mapping statistics - AG genome
	F1	F2	F4	F6	F8	M1	M3	M5	M7	M9	min	max
Number of reads (R1)	246144521	277173516	313421705	274910730	295328824	257938087	270134113	233348977	293330770	263901228
Number of reads (R2)	246144521	277173516	313421705	274910730	295328824	257938087	270134113	233348977	293330770	263901228
Total	492289042	554347032	626843410	549821460	590657648	515876174	540268226	466697954	586661540	527802456
Reads mapped (Total)	490650267	552224416	624755505	547618057	588627375	514272251	538190982	464876274	584475813	525775674
%	99.7	99.6	99.7	99.6	99.7	99.7	99.6	99.6	99.6	99.6
properly paired	412006868	459622166	520471452	453218920	485340190	427825500	451961298	388578318	488691076	444405666
%	83.69	82.91	83.03	82.43	82.17	82.93	83.65	83.26	83.3	84.2	82.17	84.2
singeltons	606169	654120	738433	714923	758961	605457	652322	736864	692129	655616
%	0.12	0.12	0.12	0.13	0.13	0.12	0.12	0.16	0.12	0.12
with mate mapped to a different chr	78037230	91948130	103545620	93684214	102528224	85841294	85577362	75561092	95092608	80714392
%	15.85	16.59	16.52	17.04	17.36	16.64	15.84	16.19	16.21	15.29	15.29	17.36
B. Mapping statistics - AR Male
	F1	F2	F4	F6	F8	M1	M3	M5	M7	M9	min	max
Number of reads (R1)	246144521	277173516	313421705	274910730	295328824	257938087	270134113	233348977	293330770	263901228
Number of reads (R2)	246144521	277173516	313421705	274910730	295328824	257938087	270134113	233348977	293330770	263901228
Total	492289042	554347032	626843410	549821460	590657648	515876174	540268226	466697954	586661540	527802456
Reads mapped (Total)	479771721	539836777	610388683	535467672	575460316	503003995	525885130	454568606	571486724	514590568
%	97.5	97.4	97.4	97.4	97.4	97.5	97.3	97.4	97.4	97.5	97.3	97.5
properly paired	441366996	494994266	559546490	492072054	528310414	462960320	481755974	417135468	525597862	473131910
%	89.66	89.29	89.26	89.5	89.44	89.74	89.17	89.38	89.59	89.64	89.17	89.74
singeltons	2529405	2921211	3332041	3006212	3258930	2705161	2834258	2619178	3049222	2585616
%	0.51	0.53	0.53	0.55	0.55	0.52	0.52	0.56	0.52	0.49
with mate mapped to a different chr	35875320	41921300	47510152	40389406	43890972	37338514	41294898	34813960	42839640	38873042
%	7.29	7.56	7.58	7.35	7.43	7.24	7.64	7.46	7.3	7.37	7.24	7.64
C. Mapping statistics - AR Female
	F1	F2	F4	F6	F8	M1	M3	M5	M7	M9	min	max
Number of reads (R1)	246144521	277173516	313421705	274910730	295328824	257938087	270134113	233348977	293330770	263901228
Number of reads (R2)	246144521	277173516	313421705	274910730	295328824	257938087	270134113	233348977	293330770	263901228
Total	492289042	554347032	626843410	549821460	590657648	515876174	540268226	466697954	586661540	527802456
Reads mapped (Total)	479872975	540273669	610817209	535862355	575842287	503445807	526195694	454901691	571915142	514586755
%	97.5	97.5	97.4	97.5	97.5	97.6	97.4	97.5	97.5	97.5	97.4	97.6
properly paired	442300984	496920910	561124868	494168130	530000810	464532960	482898974	418342092	527180948	474337208
%	89.8	89.6	89.5	89.9	89.7	90	89.4	89.6	89.9	89.9	89.4	90
singeltons	2223271	2540829	2935851	2626497	2874401	2378159	2501850	2324087	2677446	2265253
%	0.45	0.46	0.47	0.48	0.49	0.46	0.46	0.5	0.46	0.43
with mate mapped to a different chr	35348720	40811930	46756490	39067728	42967076	36534688	40794870	34235512	42056748	37984294
%	7.18	7.36	7.46	7.11	7.27	7.08	7.55	7.34	7.17	7.2	7.08	7.55

## Sheet: Table S4
Variation analysis
	inter-species variation		inter-sex variation in AG
Reference genome:	AR male	AR female	AR female
number of records:	2855785	2802343	7382
number of SNPs:	2498279	2526786	6337
number of indels:	357506	275557	1045
number of insertions:	198213	178414	588
number of deletions:	159293	97143	457
Records/Genome size	0.00156011	0.00171006	4.50467e-06
Genome size/ records	640.98	584.776	221992
% SNPs/total	87.4813	90.1669	85.8439
%indels/total	12.5187	9.83309	14.1561
Male Genome length	1830501248
Female Genome length	1638742712

## Sheet: Table S5
	dN/dS analysis results
	Gene_1	Gene_2	dnds	dN	dS
1	lcl|NC_048362.1_prot_XP_034768258.1_55461	k119_658605:8161-12242	0.001	0	0.0465
2	lcl|NC_048330.1_prot_XP_034778475.1_17795	k119_3209945:1-1972	0.001	0	0.015
3	lcl|NC_048330.1_prot_XP_034778272.1_17803	k119_2778634:6680-8390	0.001	0	0.0122
4	lcl|NC_048352.1_prot_XP_033851290.1_51091	k119_2027280:86-805	0.001	0	0.031
5	lcl|NC_048325.1_prot_XP_033854806.1_7002	k119_1602024:2889-3626	0.001	0	0.0192
6	lcl|NC_048323.1_prot_XP_033890692.1_1827	k119_4561712:3478-4569	0.001	0	0.0124
7	lcl|NC_048334.1_prot_XP_033899651.1_26471	k119_3413511:1-2096	0.001	0	0.011
8	lcl|NC_048343.1_prot_XP_034759443.1_40273	k119_4354870:556-4168	0.001	0.0001	0.052
9	lcl|NC_048341.1_prot_XP_034757405.1_37672	k119_2418205:3694-4344	0.001	0	0.034
10	lcl|NC_048338.1_prot_XP_033892621.1_32725	k119_3990970:1-1761	0.001	0	0.0281
11	lcl|NC_048326.1_prot_XP_033914119.1_9044	k119_4524314:19-4857	0.001	0	0.0231
12	lcl|NC_048331.1_prot_XP_034779260.1_20986	k119_1023234:313-2805	0.001	0	0.0245
13	lcl|NC_048330.1_prot_XP_034778345.1_18242	k119_4744679:2108-5731	0.001	0	0.0238
14	lcl|NC_048339.1_prot_XP_033897444.1_33803	k119_61721:1734-3847	0.001	0	0.0184
15	lcl|NC_048324.1_prot_XP_033870123.1_4749	k119_3892334:1369-3528	0.001	0	0.0198
16	lcl|NC_048341.1_prot_XP_034757682.1_37663	k119_1282401:1315-4195	0.001	0	0.0421
17	lcl|NC_048342.1_prot_XP_034759051.1_38199	k119_645094:1833-3404	0.001	0.0001	0.0541
18	lcl|NC_048328.1_prot_XP_033873319.2_13668	k119_1276168:2462-2872	0.001	0	0.0222
19	lcl|NC_048323.1_prot_XP_033890674.1_957	k119_3255058:794-3385	0.001	0.0001	0.1105
20	lcl|NC_048362.1_prot_XP_033857799.1_55778	k119_1915171:781-2029	0.001	0.0001	0.0666
21	lcl|NC_048339.1_prot_XP_033896972.1_34256	k119_4557212:6076-6545	0.001	0.0001	0.0897
22	lcl|NW_023262613.1_prot_XP_033892527.1_64073	k119_1698858:2034-4087	0.001	0	0.0435
23	lcl|NC_048352.1_prot_XP_034765162.1_51084	k119_31009:636-1218	0.001	0	0.0369
24	lcl|NC_048344.1_prot_XP_033897615.1_41710	k119_1409319:491-1783	0.001	0	0.0273
25	lcl|NC_048351.1_prot_XP_034764537.1_50053	k119_1825934:1007-1282	0.001	0.0001	0.097
26	lcl|NC_048362.1_prot_XP_034768294.1_55709	k119_780097:6563-8027	0.001	0	0.0316
27	lcl|NC_048327.1_prot_XP_033861183.1_11057	k119_4953162:1-4520	0.001	0	0.0265
28	lcl|NW_023261056.1_prot_XP_033909989.1_61870	k119_3441264:1-3919	0.001	0	0.0179
29	lcl|NC_048331.1_prot_XP_034779347.1_20706	k119_2627602:1-3039	0.001	0	0.0138
30	lcl|NC_048337.1_prot_XP_033908287.1_30557	k119_1320490:503-6549	0.001	0	0.0179
31	lcl|NC_048341.1_prot_XP_033902022.1_37677	k119_4639509:1-9397	0.001	0	0.0107
32	lcl|NC_048331.1_prot_XP_034779208.1_21142	k119_12914:1-5813	0.001	0	0.0126
33	lcl|NC_048343.1_prot_XP_033876983.2_40128	k119_2797636:1-5746	0.001	0	0.0365
34	lcl|NC_048324.1_prot_XP_033871827.2_5185	k119_2591901:1-6446	0.001	0	0.0142
35	lcl|NC_048370.1_prot_XP_034770017.1_58704	k119_1983891:219-2092	0.001	0.0001	0.0627
36	lcl|NC_048343.1_prot_XP_033875832.1_40280	k119_119768:409-3527	0.001	0	0.0251
37	lcl|NC_048327.1_prot_XP_033860667.1_11166	k119_3241821:819-6974	0.001	0	0.0206
38	lcl|NC_048359.1_prot_XP_033912580.1_54147	k119_2780670:2470-6486	0.001	0	0.0186
39	lcl|NC_048324.1_prot_XP_034760597.1_3956	k119_867766:7529-11369	0.001	0	0.0109
40	lcl|NC_048335.1_prot_XP_033886607.2_28350	k119_2053865:1-3593	0.001	0	0.0381
41	lcl|NC_048333.1_prot_XP_033885390.2_24166	k119_2556727:175-4348	0.001	0	0.0153
42	lcl|NC_048339.1_prot_XP_033896371.1_33905	k119_2362959:1-4686	0.001	0.0001	0.0537
43	lcl|NC_048332.1_prot_XP_034780422.1_22647	k119_4872291:375-3377	0.001	0	0.0185
44	lcl|NC_048327.1_prot_XP_033859901.2_11259	k119_2806714:1-1332	0.001	0	0.0213
45	lcl|NC_048337.1_prot_XP_033908769.1_30335	k119_3869525:31-2132	0.001	0	0.039
46	lcl|NC_048324.1_prot_XP_033869657.2_5191	k119_115664:2362-8764	0.001	0	0.0174
47	lcl|NC_048329.1_prot_XP_033881105.1_15840	k119_55837:7708-10818	0.0153	0.0016	0.104
48	lcl|NC_048343.1_prot_XP_033876736.1_39520	k119_1987477:3181-5672	0.0157	0.0009	0.0569
49	lcl|NC_048335.1_prot_XP_033887464.2_28657	k119_2577448:6-3995	0.0158	0.002	0.125
50	lcl|NC_048338.1_prot_XP_033893484.1_33076	k119_3454668:1574-2923	0.0179	0.0009	0.0518
51	lcl|NC_048362.1_prot_XP_034768220.1_55415	k119_1969666:1-4012	0.0195	0.0012	0.0598
52	lcl|NC_048341.1_prot_XP_034758334.1_37851	k119_1623439:1060-2553	0.0203	0.0011	0.0545
53	lcl|NC_048329.1_prot_XP_033881672.1_15542	k119_1970059:1226-2047	0.0214	0.0014	0.0668
54	lcl|NC_048341.1_prot_XP_033902877.2_36965	k119_465725:65-2670	0.0223	0.0007	0.0307
55	lcl|NC_048364.1_prot_XP_033851575.2_56511	k119_3946864:3144-4318	0.0232	0.0017	0.0717
56	lcl|NC_048369.1_prot_XP_034769672.1_58033	k119_2800912:1455-3782	0.0232	0.0013	0.0552
57	lcl|NC_048377.1_prot_XP_034771147.1_60134	k119_2651082:1462-2421	0.0234	0.0013	0.0562
58	lcl|NC_048332.1_prot_XP_033868172.1_21656	k119_270282:1-4327	0.0262	0.0017	0.0658
59	lcl|NC_048377.1_prot_XP_034771103.1_60325	k119_3405752:59-1192	0.0273	0.0014	0.0519
60	lcl|NW_023261471.1_prot_XP_033887867.2_62874	k119_3890427:777-2311	0.0274	0.0017	0.0634
61	lcl|NC_048363.1_prot_XP_034768303.1_56231	k119_1472070:921-4114	0.0282	0.0009	0.032
62	lcl|NC_048341.1_prot_XP_034757991.1_37887	k119_3960536:683-3270	0.0288	0.0017	0.0593
63	lcl|NC_048329.1_prot_XP_033881966.2_16635	k119_4481091:1-3946	0.0304	0.0021	0.0678
64	lcl|NC_048351.1_prot_XP_034764456.1_50046	k119_736069:32-3180	0.031	0.0013	0.0434
65	lcl|NC_048361.1_prot_XP_034767808.1_55099	k119_956956:1-3754	0.0311	0.001	0.0331
66	lcl|NC_048329.1_prot_XP_033881740.1_17048	k119_676760:294-2240	0.0313	0.0008	0.025
67	lcl|NC_048340.1_prot_XP_033894395.1_35914	k119_1780185:1-8255	0.0317	0.0015	0.0488
68	lcl|NC_048335.1_prot_XP_033887632.1_28400	k119_91681:1-5172	0.0336	0.001	0.0304
69	lcl|NW_023260927.1_prot_XP_034772232.1_61575	k119_4509729:259-1363	0.0366	0.0014	0.0376
70	lcl|NC_048339.1_prot_XP_033896583.1_33809	k119_3848333:1006-4381	0.0366	0.0011	0.0314
71	lcl|NC_048342.1_prot_XP_034758559.1_38944	k119_4990348:561-1199	0.0371	0.0018	0.0493
72	lcl|NC_048352.1_prot_XP_034764907.1_51094	k119_4519666:1-4574	0.0372	0.0017	0.0468
73	lcl|NW_023261119.1_prot_XP_033857136.1_62020	k119_1435689:1-4955	0.0384	0.0043	0.1122
74	lcl|NC_048330.1_prot_XP_033865234.1_17800	k119_281169:2193-4544	0.0399	0.0018	0.0447
75	lcl|NC_048329.1_prot_XP_033883112.1_15877	k119_1704506:1-2435	0.0405	0.0021	0.0507
76	lcl|NC_048334.1_prot_XP_033903479.2_25667	k119_4812642:309-3923	0.0406	0.0014	0.0356
77	lcl|NC_048325.1_prot_XP_033854169.1_6832	k119_2090134:1-4621	0.0409	0.0019	0.0471
78	lcl|NC_048348.1_prot_XP_033913420.1_45868	k119_2351471:31-882	0.0416	0.0029	0.0696
79	lcl|NC_048364.1_prot_XP_033851633.2_56495	k119_4465027:1-908	0.0419	0.0018	0.0441
80	lcl|NC_048341.1_prot_XP_034758329.1_37485	k119_3666291:284-1111	0.0422	0.0015	0.0364
81	lcl|NC_048326.1_prot_XP_033914968.1_9045	k119_2791889:4620-9117	0.043	0.0011	0.0246
82	lcl|NC_048350.1_prot_XP_033907380.2_48115	k119_739325:1734-3157	0.0433	0.0023	0.0532
83	lcl|NC_048325.1_prot_XP_033855757.1_6529	k119_185786:1-1065	0.0436	0.0045	0.1035
84	lcl|NC_048352.1_prot_XP_034764943.1_50953	k119_136448:112-1686	0.0438	0.003	0.0686
85	lcl|NC_048376.1_prot_XP_034771034.1_60050	k119_3907015:1-1103	0.0442	0.0033	0.0737
86	lcl|NC_048340.1_prot_XP_033895741.2_34720	k119_1115201:1533-7344	0.0468	0.0018	0.038
87	lcl|NC_048342.1_prot_XP_033875767.2_38242	k119_2657083:1839-5849	0.049	0.0009	0.0184
88	lcl|NC_048333.1_prot_XP_033884133.1_23427	k119_2216977:1-3874	0.0495	0.0008	0.0155
89	lcl|NC_048326.1_prot_XP_033915077.1_9376	k119_713937:2071-3998	0.0504	0.0011	0.0209
90	lcl|NC_048346.1_prot_XP_034761256.1_44266	k119_1761498:1601-3320	0.0504	0.0021	0.0418
91	lcl|NC_048349.1_prot_XP_033906255.2_46813	k119_3856793:1673-5884	0.0518	0.0032	0.0613
92	lcl|NC_048323.1_prot_XP_033890936.1_218	k119_4083967:408-2396	0.052	0.0022	0.042
93	lcl|NC_048335.1_prot_XP_033887595.2_28570	k119_897663:6265-8455	0.054	0.0036	0.0669
94	lcl|NC_048349.1_prot_XP_033904851.1_47559	k119_4599922:7936-10356	0.0551	0.0027	0.0488
95	lcl|NC_048359.1_prot_XP_034767138.1_53799	k119_72650:764-3776	0.0577	0.0018	0.0304
96	lcl|NC_048339.1_prot_XP_033897191.2_33854	k119_3543735:131-1093	0.0578	0.0019	0.0333
97	lcl|NC_048351.1_prot_XP_033877995.1_50140	k119_4799009:314-3163	0.0583	0.003	0.0508
98	lcl|NC_048345.1_prot_XP_034760820.1_42132	k119_2822318:74-1323	0.0586	0.0026	0.0443
99	lcl|NC_048362.1_prot_XP_033857576.1_55811	k119_743890:1-2177	0.0596	0.0028	0.0465
100	lcl|NC_048345.1_prot_XP_033898288.2_41941	k119_200671:1-2411	0.0641	0.0028	0.0439
101	lcl|NC_048362.1_prot_XP_034768103.1_55863	k119_3374003:170-1285	0.0641	0.0011	0.0169
102	lcl|NC_048327.1_prot_XP_033861302.1_12073	k119_4267743:7283-10008	0.0648	0.0015	0.0229
103	lcl|NC_048324.1_prot_XP_033869103.2_5434	k119_8274:1206-3208	0.0654	0.0022	0.0341
104	lcl|NC_048350.1_prot_XP_034763972.1_49200	k119_292191:3927-4712	0.0657	0.0061	0.0926
105	lcl|NW_023263314.1_prot_XP_034774755.1_64782	k119_3470708:1006-2947	0.0665	0.0029	0.0438
106	lcl|NC_048349.1_prot_XP_034763101.1_47478	k119_3905220:559-12839	0.0667	0.0009	0.0133
107	lcl|NC_048338.1_prot_XP_033883645.2_33305	k119_3981559:76-1158	0.0672	0.0033	0.0495
108	lcl|NC_048337.1_prot_XP_033908670.2_30402	k119_2070522:1-7721	0.0683	0.0017	0.0255
109	lcl|NC_048325.1_prot_XP_034776591.1_7510	k119_703661:410-1435	0.0701	0.0013	0.0181
110	lcl|NC_048362.1_prot_XP_033857728.2_55694	k119_110175:202-2468	0.0704	0.0043	0.0612
111	lcl|NC_048323.1_prot_XP_033890728.1_95	k119_352062:3879-7303	0.0719	0.0012	0.0167
112	lcl|NC_048333.1_prot_XP_033883691.1_25111	k119_2986273:1015-2190	0.0735	0.0051	0.0694
113	lcl|NC_048366.1_prot_XP_034769023.1_57084	k119_1511265:2540-15206	0.0738	0.0023	0.0307
114	lcl|NC_048348.1_prot_XP_033912915.2_46595	k119_864033:1266-2357	0.0745	0.0046	0.0615
115	lcl|NC_048362.1_prot_XP_034768259.1_55460	k119_658605:1590-6563	0.0769	0.0038	0.0501
116	lcl|NC_048346.1_prot_XP_033887561.1_43236	k119_2701884:1490-3724	0.077	0.002	0.0256
117	lcl|NC_048331.1_prot_XP_034779111.1_19258	k119_3304607:6-1229	0.0775	0.0031	0.0396
118	lcl|NC_048332.1_prot_XP_033860701.2_23219	k119_74968:536-3013	0.0776	0.0038	0.0491
119	lcl|NC_048330.1_prot_XP_033866919.1_18848	k119_3380805:893-1906	0.0777	0.0013	0.0169
120	lcl|NW_023261437.1_prot_XP_034773141.1_62701	k119_1391081:1-4868	0.0784	0.0048	0.0607
121	lcl|NC_048345.1_prot_XP_033910259.1_42284	k119_32378:7823-10227	0.0787	0.001	0.0127
122	lcl|NC_048340.1_prot_XP_033894815.2_36129	k119_770690:13-927	0.0788	0.0041	0.0526
123	lcl|NC_048346.1_prot_XP_033902699.1_44274	k119_2585921:2350-4414	0.0806	0.0025	0.031
124	lcl|NC_048337.1_prot_XP_033908040.1_30727	k119_858396:3116-5607	0.0809	0.0027	0.0333
125	lcl|NC_048329.1_prot_XP_033881798.2_16289	k119_217875:1083-2884	0.0819	0.0021	0.026
126	lcl|NC_048347.1_prot_XP_034762511.1_45661	k119_300289:4122-5802	0.0821	0.0038	0.0457
127	lcl|NC_048353.1_prot_XP_033911278.2_51311	k119_3252868:1447-8114	0.0823	0.004	0.0482
128	lcl|NC_048379.1_prot_XP_034771441.1_60684	k119_4892716:376-1749	0.0833	0.0036	0.0431
129	lcl|NC_048333.1_prot_XP_034780627.1_23495	k119_2850990:2827-5976	0.0839	0.0074	0.0886
130	lcl|NC_048369.1_prot_XP_034769859.1_58135	k119_1995456:235-1114	0.0844	0.0053	0.0625
131	lcl|NC_048345.1_prot_XP_034760863.1_41983	k119_1099584:341-3634	0.0848	0.0027	0.0314
132	lcl|NC_048337.1_prot_XP_033908262.1_30545	k119_7561:369-2588	0.0855	0.0035	0.0409
133	lcl|NC_048326.1_prot_XP_033914911.1_8174	k119_4360839:191-1163	0.0865	0.0032	0.0367
134	lcl|NC_048330.1_prot_XP_033865311.2_17617	k119_1123685:1-2493	0.0865	0.0036	0.041
135	lcl|NC_048326.1_prot_XP_033915174.2_10022	k119_3431393:1099-2238	0.0879	0.0011	0.0128
136	lcl|NC_048343.1_prot_XP_033876057.2_40460	k119_2678547:504-1793	0.0881	0.0091	0.1036
137	lcl|NC_048337.1_prot_XP_033907561.1_31126	k119_3576056:608-2638	0.09	0.0018	0.0198
138	lcl|NC_048341.1_prot_XP_033901758.1_37085	k119_1535753:401-1597	0.0904	0.0052	0.0576
139	lcl|NC_048359.1_prot_XP_033848812.2_54346	k119_1504802:1-885	0.0908	0.0054	0.059
140	lcl|NC_048334.1_prot_XP_033901752.2_25291	k119_447799:1-10567	0.092	0.0032	0.0351
141	lcl|NC_048333.1_prot_XP_033884403.1_25014	k119_357532:3897-6065	0.0931	0.0036	0.0386
142	lcl|NC_048341.1_prot_XP_033902189.1_36907	k119_3215078:948-5493	0.0931	0.0021	0.0224
143	lcl|NC_048366.1_prot_XP_033851886.2_57149	k119_249789:7618-9007	0.0933	0.0023	0.0245
144	lcl|NC_048369.1_prot_XP_034769717.1_57985	k119_2794907:294-3387	0.094	0.004	0.0425
145	lcl|NC_048338.1_prot_XP_033873939.2_33189	k119_2355742:3351-5429	0.0943	0.0025	0.0261
146	lcl|NC_048341.1_prot_XP_033902255.2_37956	k119_1396129:1-5688	0.0957	0.0036	0.038
147	lcl|NC_048331.1_prot_XP_033864188.1_19591	k119_106116:6279-7052	0.0971	0.0067	0.069
148	lcl|NC_048328.1_prot_XP_033873953.2_13972	k119_1459550:774-4678	0.0982	0.0012	0.0124
149	lcl|NC_048342.1_prot_XP_034758912.1_38566	k119_646761:1-7754	0.099	0.0049	0.05
150	lcl|NC_048330.1_prot_XP_033864591.2_17146	k119_68087:8710-10638	0.1002	0.002	0.0199
151	lcl|NC_048338.1_prot_XP_033892994.1_32229	k119_4794554:614-2560	0.1012	0.0054	0.0529
152	lcl|NC_048376.1_prot_XP_033853445.2_60015	k119_799639:1-1940	0.1023	0.0078	0.0766
153	lcl|NC_048327.1_prot_XP_033859140.2_11134	k119_931625:1183-3756	0.103	0.0032	0.0308
154	lcl|NC_048359.1_prot_XP_034766962.1_53750	k119_859999:1-3807	0.1032	0.0038	0.0371
155	lcl|NC_048353.1_prot_XP_033911273.1_51186	k119_4572810:1-3249	0.1036	0.0038	0.0369
156	lcl|NC_048351.1_prot_XP_033877767.1_50252	k119_2809880:1987-3114	0.1042	0.0034	0.0322
157	lcl|NC_048328.1_prot_XP_033872877.1_12649	k119_71324:714-4874	0.1043	0.0044	0.0422
158	lcl|NC_048341.1_prot_XP_033902203.2_37439	k119_4563919:1-2505	0.1047	0.0032	0.0303
159	lcl|NC_048331.1_prot_XP_033864086.2_20097	k119_703335:59-3103	0.1049	0.0026	0.0248
160	lcl|NC_048369.1_prot_XP_034769648.1_57984	k119_2608638:183-2336	0.105	0.0057	0.054
161	lcl|NC_048325.1_prot_XP_033854500.1_7655	k119_4648847:62-5586	0.105	0.0013	0.0123
162	lcl|NC_048332.1_prot_XP_033857212.2_21424	k119_1428462:909-2269	0.1067	0.0057	0.053
163	lcl|NC_048329.1_prot_XP_033881144.1_15934	k119_697218:5444-8853	0.1072	0.0022	0.0201
164	lcl|NC_048331.1_prot_XP_033864656.2_20325	k119_4629679:1-1920	0.1076	0.0033	0.0309
165	lcl|NC_048336.1_prot_XP_033889348.1_29925	k119_4731197:1-479	0.1092	0.0054	0.0499
166	lcl|NC_048350.1_prot_XP_033896437.1_48097	k119_2647789:774-2021	0.1093	0.0028	0.0253
167	lcl|NC_048355.1_prot_XP_034765877.1_52503	k119_110980:562-2449	0.1101	0.0046	0.0414
168	lcl|NC_048344.1_prot_XP_033899035.1_41011	k119_3513026:1-2351	0.1104	0.004	0.036
169	lcl|NC_048325.1_prot_XP_033856657.1_6247	k119_2908450:460-1710	0.1106	0.0079	0.0716
170	lcl|NC_048329.1_prot_XP_033880677.1_16284	k119_4687477:1-1306	0.1117	0.0033	0.0297
171	lcl|NC_048326.1_prot_XP_033914208.1_9201	k119_168729:4871-7862	0.1122	0.0039	0.0347
172	lcl|NC_048351.1_prot_XP_033878008.1_49942	k119_2210858:1-6289	0.1125	0.0036	0.0317
173	lcl|NW_023262950.1_prot_XP_034774461.1_64406	k119_2280919:469-747	0.1133	0.0045	0.0398
174	lcl|NW_023263740.1_prot_XP_033893027.2_66322	k119_2918607:252-7278	0.1139	0.0019	0.0168
175	lcl|NC_048325.1_prot_XP_033854805.2_7560	k119_3492548:4854-5690	0.115	0.003	0.026
176	lcl|NC_048342.1_prot_XP_033906216.1_39222	k119_1469360:1458-1976	0.1158	0.0026	0.0229
177	lcl|NC_048340.1_prot_XP_033894897.2_36029	k119_3994037:1-5254	0.1165	0.0019	0.0165
178	lcl|NC_048339.1_prot_XP_033896341.2_34258	k119_1667975:1-8328	0.117	0.003	0.0258
179	lcl|NC_048332.1_prot_XP_033857538.1_22099	k119_3988950:2383-4856	0.1174	0.0035	0.0294
180	lcl|NC_048325.1_prot_XP_034774006.1_6502	k119_3869869:5818-12185	0.1178	0.0039	0.0332
181	lcl|NC_048338.1_prot_XP_033887501.2_32529	k119_3316449:323-2800	0.118	0.0015	0.0127
182	lcl|NC_048337.1_prot_XP_033908884.2_31342	k119_889370:834-1529	0.1181	0.0018	0.0152
183	lcl|NC_048343.1_prot_XP_034759541.1_40545	k119_436160:792-1952	0.1182	0.0073	0.0621
184	lcl|NC_048362.1_prot_XP_033857804.2_55678	k119_4833881:1-4405	0.1183	0.0045	0.0376
185	lcl|NC_048332.1_prot_XP_034780293.1_21313	k119_2730870:3-3154	0.1189	0.0055	0.0462
186	lcl|NC_048327.1_prot_XP_033860477.2_12207	k119_2693628:1-4989	0.1192	0.0014	0.0117
187	lcl|NC_048350.1_prot_XP_033912198.2_48871	k119_847377:1175-5645	0.1199	0.0079	0.0659
188	lcl|NC_048329.1_prot_XP_033880362.1_16319	k119_1347409:3800-5263	0.1229	0.0018	0.0148
189	lcl|NC_048334.1_prot_XP_033899640.1_26101	k119_3380836:69-2288	0.1229	0.0052	0.0421
190	lcl|NC_048330.1_prot_XP_034778912.1_17165	k119_10517:8361-21316	0.1231	0.0019	0.0155
191	lcl|NC_048353.1_prot_XP_033911713.1_51204	k119_1918731:9360-12092	0.1232	0.0041	0.033
192	lcl|NW_023263564.1_prot_XP_033876880.2_65878	k119_4872709:169-2721	0.1238	0.0015	0.012
193	lcl|NC_048345.1_prot_XP_034760816.1_42172	k119_1285226:76-2124	0.1252	0.0059	0.0471
194	lcl|NC_048324.1_prot_XP_033870499.1_5194	k119_2874376:1-1334	0.1269	0.0039	0.0308
195	lcl|NC_048346.1_prot_XP_034761680.1_43761	k119_1446067:2304-6124	0.1275	0.0023	0.018
196	lcl|NC_048351.1_prot_XP_033908805.1_49900	k119_225723:2193-4160	0.1277	0.0028	0.0217
197	lcl|NC_048338.1_prot_XP_033893372.1_33328	k119_3513125:1-5597	0.1277	0.0029	0.0228
198	lcl|NW_023263564.1_prot_XP_034775428.1_65856	k119_3854284:1-6472	0.1278	0.0056	0.0438
199	lcl|NC_048327.1_prot_XP_033861221.1_10500	k119_2159161:5810-8113	0.1293	0.0039	0.03
200	lcl|NC_048340.1_prot_XP_033895691.1_36170	k119_4560466:1223-3449	0.1293	0.0102	0.0786
201	lcl|NC_048369.1_prot_XP_034769743.1_58238	k119_2221041:1159-3093	0.1301	0.0121	0.0928
202	lcl|NC_048339.1_prot_XP_033896533.1_34538	k119_3415043:1-1347	0.1301	0.0056	0.0433
203	lcl|NC_048325.1_prot_XP_033856727.2_6918	k119_881028:4486-5340	0.1302	0.0015	0.0115
204	lcl|NC_048329.1_prot_XP_033881337.2_15967	k119_2027895:2264-2851	0.1303	0.0022	0.0168
205	lcl|NC_048324.1_prot_XP_033869520.2_4670	k119_1342096:1-9798	0.1304	0.002	0.0155
206	lcl|NC_048337.1_prot_XP_033877947.2_31404	k119_870180:1074-2054	0.131	0.0069	0.0526
207	lcl|NC_048332.1_prot_XP_033859013.2_21338	k119_1530956:218-931	0.1312	0.0103	0.0789
208	lcl|NC_048333.1_prot_XP_033883950.2_23602	k119_272338:1-3296	0.1315	0.0017	0.0133
209	lcl|NC_048344.1_prot_XP_033898273.1_41259	k119_1409167:712-2492	0.1323	0.0034	0.0259
210	lcl|NC_048335.1_prot_XP_033886355.1_27498	k119_3945572:3069-15275	0.1334	0.0036	0.0269
211	lcl|NC_048352.1_prot_XP_033851257.2_50718	k119_2829499:1544-3115	0.1335	0.0026	0.0197
212	lcl|NC_048366.1_prot_XP_033851541.2_57133	k119_4177490:108-3615	0.1336	0.0089	0.0667
213	lcl|NC_048352.1_prot_XP_033851000.1_50912	k119_107340:3960-4457	0.1347	0.0079	0.0584
214	lcl|NC_048345.1_prot_XP_034760749.1_42526	k119_303981:8814-9935	0.137	0.0096	0.07
215	lcl|NC_048350.1_prot_XP_033850320.1_48977	k119_208730:861-2628	0.1399	0.0108	0.0773
216	lcl|NC_048340.1_prot_XP_033894506.1_35287	k119_2177433:1-2965	0.14	0.0572	0.4082
217	lcl|NC_048333.1_prot_XP_034780720.1_24731	k119_4530099:1437-3033	0.1403	0.0021	0.0149
218	lcl|NC_048339.1_prot_XP_033896692.2_34156	k119_2627986:165-1571	0.1415	0.0054	0.038
219	lcl|NC_048353.1_prot_XP_033911297.2_51315	k119_4636752:1499-7288	0.142	0.0034	0.0237
220	lcl|NC_048323.1_prot_XP_033890196.2_1503	k119_2614237:1-5327	0.1421	0.0015	0.0106
221	lcl|NC_048330.1_prot_XP_034778982.1_19244	k119_2667535:137-1201	0.1448	0.0112	0.0775
222	lcl|NC_048329.1_prot_XP_033880331.1_14574	k119_4794103:453-1196	0.1454	0.0117	0.0802
223	lcl|NC_048348.1_prot_XP_033913450.2_46647	k119_3241598:269-3388	0.1455	0.017	0.1166
224	lcl|NC_048347.1_prot_XP_033879263.2_44848	k119_3855599:1259-1741	0.1456	0.0075	0.0517
225	lcl|NC_048339.1_prot_XP_033897425.2_34575	k119_4033958:936-3176	0.1481	0.0046	0.0308
226	lcl|NC_048327.1_prot_XP_033860112.2_10557	k119_2640287:1-8326	0.1484	0.0019	0.0129
227	lcl|NC_048350.1_prot_XP_033901848.2_48247	k119_4139713:5818-8244	0.151	0.0033	0.0216
228	lcl|NC_048328.1_prot_XP_033873367.2_13711	k119_1091546:1878-4417	0.1517	0.007	0.0463
229	lcl|NC_048359.1_prot_XP_033850604.1_54252	k119_4757727:1-2074	0.1521	0.0132	0.0867
230	lcl|NC_048334.1_prot_XP_033899533.1_26878	k119_2871885:28-804	0.1524	0.008	0.0526
231	lcl|NC_048350.1_prot_XP_033911641.2_48650	k119_107920:179-3580	0.1534	0.0048	0.031
232	lcl|NC_048348.1_prot_XP_033913556.1_46054	k119_790415:1-2346	0.1544	0.0071	0.0461
233	lcl|NC_048334.1_prot_XP_034781277.1_25381	k119_4061367:799-6597	0.1553	0.0124	0.08
234	lcl|NC_048340.1_prot_XP_033894116.1_35404	k119_4495147:5173-12611	0.1555	0.0225	0.145
235	lcl|NW_023263472.1_prot_XP_034775201.1_65446	k119_3919803:931-2783	0.1563	0.0049	0.0313
236	lcl|NC_048335.1_prot_XP_033885966.1_28504	k119_3848041:1-12070	0.1571	0.0035	0.0223
237	lcl|NC_048350.1_prot_XP_034764174.1_48339	k119_2824379:1627-6742	0.1585	0.0091	0.0572
238	lcl|NC_048353.1_prot_XP_033911564.1_51136	k119_1730039:3702-10169	0.1601	0.0075	0.0469
239	lcl|NC_048330.1_prot_XP_033864364.2_17604	k119_3896418:134-7888	0.1603	0.0059	0.0365
240	lcl|NC_048349.1_prot_XP_033904523.2_47115	k119_1284183:2966-6942	0.1613	0.0056	0.0349
241	lcl|NC_048381.1_prot_XP_034771546.1_60743	k119_4210721:5078-8215	0.1618	0.0033	0.0205
242	lcl|NC_048360.1_prot_XP_033852709.2_54492	k119_3238575:1-1801	0.1626	0.0072	0.0442
243	lcl|NC_048341.1_prot_XP_033901646.2_37981	k119_4242389:1475-4162	0.163	0.0042	0.0257
244	lcl|NC_048339.1_prot_XP_033897182.2_33454	k119_65707:1726-3402	0.1672	0.0112	0.0668
245	lcl|NW_023262574.1_prot_XP_034774146.1_64020	k119_2764827:484-1146	0.1678	0.0038	0.0229
246	lcl|NC_048325.1_prot_XP_034769227.1_8005	k119_4656760:3892-6111	0.1681	0.0046	0.0272
247	lcl|NC_048324.1_prot_XP_033869743.1_3615	k119_2129492:1-4911	0.1684	0.0019	0.0114
248	lcl|NC_048361.1_prot_XP_034767834.1_55227	k119_184071:98-8955	0.1695	0.0045	0.0264
249	lcl|NC_048346.1_prot_XP_033887654.2_43217	k119_3752048:598-4943	0.1706	0.0043	0.0252
250	lcl|NC_048346.1_prot_XP_033896712.1_44302	k119_3842907:2346-9812	0.1708	0.003	0.0177
251	lcl|NC_048345.1_prot_XP_033899241.1_43136	k119_2051137:1-1148	0.1714	0.0058	0.034
252	lcl|NC_048335.1_prot_XP_033885773.1_27685	k119_3409253:1-3320	0.1716	0.0048	0.028
253	lcl|NC_048353.1_prot_XP_033911674.2_51351	k119_3894134:6165-7412	0.1723	0.002	0.0119
254	lcl|NC_048325.1_prot_XP_033855230.2_6436	k119_3924556:2026-4029	0.173	0.0041	0.0238
255	lcl|NC_048333.1_prot_XP_033885131.1_25030	k119_3247036:1-10001	0.1742	0.0018	0.0105
256	lcl|NC_048346.1_prot_XP_034761914.1_44407	k119_1880138:1-3128	0.1756	0.0127	0.0724
257	lcl|NW_023263622.1_prot_XP_034775575.1_66011	k119_458813:1086-2590	0.1761	0.0109	0.0617
258	lcl|NC_048323.1_prot_XP_033871744.1_1811	k119_4527776:673-2029	0.1778	0.0043	0.0244
259	lcl|NC_048328.1_prot_XP_033874857.2_14002	k119_1450654:4743-11109	0.1785	0.0028	0.0157
260	lcl|NC_048338.1_prot_XP_033892373.2_32843	k119_1398595:261-1628	0.1786	0.0048	0.0268
261	lcl|NW_023261547.1_prot_XP_034773378.1_63073	k119_4651330:3116-4261	0.1787	0.0044	0.0246
262	lcl|NC_048336.1_prot_XP_033888510.1_29119	k119_3500937:7-1431	0.1834	0.0074	0.0405
263	lcl|NC_048361.1_prot_XP_033903939.2_55020	k119_2768179:414-1577	0.1887	0.0091	0.0481
264	lcl|NC_048323.1_prot_XP_033890700.1_539	k119_4253873:1589-7783	0.1896	0.0036	0.0189
265	lcl|NW_023263240.1_prot_XP_034774654.1_64659	k119_3234363:1083-3637	0.1899	0.006	0.0316
266	lcl|NC_048324.1_prot_XP_033870099.2_5605	k119_3216071:1-5559	0.1939	0.006	0.0307
267	lcl|NC_048342.1_prot_XP_034758827.1_38975	k119_2766969:8087-18699	0.1953	0.0065	0.0332
268	lcl|NC_048340.1_prot_XP_033895403.1_35973	k119_785924:67-1232	0.1959	0.004	0.0206
269	lcl|NC_048337.1_prot_XP_033908049.1_30555	k119_1281161:3632-8011	0.1963	0.0075	0.038
270	lcl|NC_048340.1_prot_XP_033894954.2_35799	k119_3309204:5294-11945	0.1969	0.0024	0.0124
271	lcl|NC_048351.1_prot_XP_033878463.2_49855	k119_2153197:832-3055	0.1972	0.0065	0.0328
272	lcl|NC_048334.1_prot_XP_033900864.2_25387	k119_4564509:831-3203	0.1975	0.1116	0.5651
273	lcl|NC_048326.1_prot_XP_033915170.1_8548	k119_2705836:1-3964	0.1985	0.0078	0.0392
274	lcl|NC_048370.1_prot_XP_034769979.1_58470	k119_1021668:782-1858	0.2008	0.0084	0.0416
275	lcl|NC_048330.1_prot_XP_033863803.2_17536	k119_2620279:1364-8307	0.2046	0.0068	0.0332
276	lcl|NC_048335.1_prot_XP_033886646.1_27197	k119_4261668:2-1309	0.2046	0.0076	0.0373
277	lcl|NC_048378.1_prot_XP_033863261.2_60446	k119_2759132:1-1564	0.2058	0.0164	0.0797
278	lcl|NC_048340.1_prot_XP_033895008.1_35536	k119_222008:671-10805	0.2071	0.0199	0.096
279	lcl|NC_048331.1_prot_XP_034779063.1_20654	k119_1287977:4547-7655	0.2083	0.0074	0.0354
280	lcl|NC_048342.1_prot_XP_034758949.1_38277	k119_3274325:1-7560	0.2089	0.0065	0.0313
281	lcl|NC_048347.1_prot_XP_034762073.1_45500	k119_1467286:2080-10697	0.2116	0.0078	0.037
282	lcl|NC_048344.1_prot_XP_033898363.1_41029	k119_121901:898-5076	0.2118	0.0224	0.1058
283	lcl|NC_048347.1_prot_XP_034762088.1_45198	k119_125579:54-1976	0.2135	0.0031	0.0146
284	lcl|NC_048342.1_prot_XP_034758418.1_38479	k119_4816545:1-6089	0.2144	0.0086	0.0402
285	lcl|NC_048349.1_prot_XP_033904616.2_48016	k119_3374457:2255-4321	0.2153	0.0101	0.047
286	lcl|NC_048334.1_prot_XP_034780909.1_25297	k119_1097305:747-2008	0.2172	0.0079	0.0366
287	lcl|NC_048327.1_prot_XP_033859994.1_11705	k119_178324:4116-6698	0.2173	0.0037	0.0172
288	lcl|NC_048346.1_prot_XP_034761107.1_44137	k119_15319:1-5958	0.2174	0.0186	0.0854
289	lcl|NC_048330.1_prot_XP_034778783.1_17099	k119_2838836:7819-10941	0.2186	0.0037	0.0169
290	lcl|NC_048331.1_prot_XP_033868490.2_19321	k119_1361063:1-2827	0.2204	0.0128	0.0582
291	lcl|NC_048352.1_prot_XP_034764971.1_50846	k119_2143771:871-5269	0.2205	0.0039	0.0177
292	lcl|NC_048337.1_prot_XP_033877624.2_31450	k119_4132578:680-1813	0.2215	0.0125	0.0563
293	lcl|NC_048343.1_prot_XP_034759448.1_40289	k119_85403:2679-3656	0.2237	0.0098	0.0439
294	lcl|NC_048333.1_prot_XP_033884216.2_24488	k119_1007321:1616-7349	0.2251	0.0035	0.0153
295	lcl|NC_048328.1_prot_XP_033874946.1_13141	k119_4546376:975-4976	0.2268	0.0054	0.024
296	lcl|NC_048327.1_prot_XP_033860030.1_10452	k119_4498596:2716-4086	0.2282	0.0057	0.0248
297	lcl|NC_048349.1_prot_XP_033904940.1_46826	k119_3865870:1-3815	0.2294	0.0056	0.0244
298	lcl|NW_023262060.1_prot_XP_033910513.1_63660	k119_730204:652-1608	0.2307	0.0079	0.0342
299	lcl|NC_048346.1_prot_XP_034761793.1_44528	k119_2589860:3387-4757	0.2313	0.0165	0.0714
300	lcl|NC_048334.1_prot_XP_033902165.2_25289	k119_2370202:1776-3521	0.2315	0.0039	0.0168
301	lcl|NC_048324.1_prot_XP_033871787.1_4117	k119_3894819:2229-6710	0.2318	0.0111	0.048
302	lcl|NC_048332.1_prot_XP_033862965.1_22072	k119_1451035:1524-6973	0.2329	0.0049	0.021
303	lcl|NC_048343.1_prot_XP_033876671.2_39981	k119_2162940:462-2035	0.2341	0.007	0.03
304	lcl|NC_048338.1_prot_XP_033892751.1_31912	k119_907958:1-3333	0.2343	0.0055	0.0237
305	lcl|NC_048350.1_prot_XP_033911685.2_48412	k119_3446279:522-2527	0.2352	0.0071	0.0303
306	lcl|NC_048350.1_prot_XP_034763671.1_48300	k119_3848272:1-2054	0.2369	0.0036	0.0153
307	lcl|NC_048346.1_prot_XP_034761331.1_43832	k119_4511084:1020-12146	0.2401	0.0034	0.0143
308	lcl|NC_048343.1_prot_XP_034759610.1_40209	k119_1367883:58-1678	0.2405	0.0049	0.0202
309	lcl|NC_048348.1_prot_XP_033913550.1_46057	k119_1435265:3587-8872	0.2405	0.0057	0.0238
310	lcl|NC_048347.1_prot_XP_034761974.1_44722	k119_1422306:58-8543	0.241	0.01	0.0414
311	lcl|NC_048340.1_prot_XP_033894204.1_34970	k119_256910:1064-2137	0.2411	0.006	0.0248
312	lcl|NC_048350.1_prot_XP_033902159.2_49278	k119_1511347:1-5364	0.2441	0.0111	0.0455
313	lcl|NC_048330.1_prot_XP_033864628.2_17598	k119_3894584:1-8278	0.2457	0.0064	0.026
314	lcl|NC_048337.1_prot_XP_034782607.1_31520	k119_2667255:1735-3468	0.2474	0.004	0.016
315	lcl|NC_048348.1_prot_XP_033913708.1_46103	k119_5015286:1-5414	0.2475	0.0179	0.0723
316	lcl|NC_048342.1_prot_XP_033904466.2_38780	k119_2191042:224-1899	0.25	0.0049	0.0197
317	lcl|NC_048350.1_prot_XP_033910661.2_49230	k119_865792:187-6630	0.2532	0.1036	0.4093
318	lcl|NC_048351.1_prot_XP_034764701.1_49577	k119_1504118:1529-2638	0.254	0.0085	0.0336
319	lcl|NC_048340.1_prot_XP_033894274.1_35882	k119_1661180:1748-11258	0.2541	0.011	0.0432
320	lcl|NC_048333.1_prot_XP_033884014.2_24096	k119_108512:1-7680	0.2543	0.0029	0.0115
321	lcl|NC_048344.1_prot_XP_034760110.1_41886	k119_3920039:350-4883	0.2547	0.0079	0.031
322	lcl|NC_048338.1_prot_XP_033892523.2_32974	k119_2175819:1-4340	0.2568	0.0102	0.0398
323	lcl|NC_048333.1_prot_XP_033885306.1_23727	k119_4544636:2966-6434	0.2571	0.0733	0.2852
324	lcl|NC_048334.1_prot_XP_034780866.1_26300	k119_4238490:1-19627	0.2578	0.0129	0.0501
325	lcl|NC_048333.1_prot_XP_033884327.1_23661	k119_1722596:1-4762	0.2579	0.0026	0.0103
326	lcl|NC_048338.1_prot_XP_034783199.1_31858	k119_2550362:2499-6087	0.2584	0.0062	0.024
327	lcl|NC_048342.1_prot_XP_033906286.2_38423	k119_37896:1-3526	0.2591	0.0132	0.0511
328	lcl|NC_048332.1_prot_XP_033855994.1_22639	k119_1567557:1366-2433	0.2618	0.0048	0.0184
329	lcl|NC_048323.1_prot_XP_033890182.1_1534	k119_2855437:2211-4157	0.2619	0.0034	0.0131
330	lcl|NC_048351.1_prot_XP_034764702.1_49894	k119_3240309:531-4628	0.2646	0.0077	0.0292
331	lcl|NC_048331.1_prot_XP_033866591.1_20924	k119_4587117:1745-2737	0.2663	0.0052	0.0195
332	lcl|NC_048339.1_prot_XP_033895970.2_33585	k119_3664440:613-4761	0.2677	0.0045	0.0169
333	lcl|NC_048328.1_prot_XP_033873234.2_14004	k119_1270237:1522-6895	0.2678	0.0117	0.0436
334	lcl|NC_048334.1_prot_XP_033901342.1_26100	k119_1330665:4295-6518	0.2709	0.0047	0.0175
335	lcl|NW_023263077.1_prot_XP_033858737.1_64519	k119_1286760:675-1736	0.2722	0.0093	0.0342
336	lcl|NW_023263314.1_prot_XP_033914754.1_64795	k119_1501973:1-2639	0.2726	0.452	1.658
337	lcl|NC_048349.1_prot_XP_034763017.1_48077	k119_63990:675-2132	0.2727	0.0161	0.0591
338	lcl|NC_048345.1_prot_XP_033909580.2_42540	k119_1570664:515-6415	0.2731	0.0268	0.098
339	lcl|NW_023260955.1_prot_XP_034772284.1_61640	k119_175867:1-897	0.2789	0.0312	0.1117
340	lcl|NC_048341.1_prot_XP_034758220.1_37352	k119_4993757:72-1982	0.2818	0.0188	0.0665
341	lcl|NC_048333.1_prot_XP_033885474.1_23478	k119_4642711:2564-6299	0.2843	0.0716	0.2518
342	lcl|NC_048348.1_prot_XP_033913897.2_45796	k119_4402779:2-4866	0.2848	0.0209	0.0735
343	lcl|NC_048323.1_prot_XP_034769268.1_707	k119_2587189:2708-9541	0.2852	0.0116	0.0405
344	lcl|NC_048340.1_prot_XP_033894523.2_35548	k119_4749118:660-7441	0.2855	0.0079	0.0275
345	lcl|NC_048343.1_prot_XP_033876040.2_39580	k119_1289846:1499-5924	0.287	0.0055	0.0193
346	lcl|NC_048345.1_prot_XP_033910015.1_43117	k119_4706075:1713-3311	0.2878	0.0072	0.025
347	lcl|NC_048330.1_prot_XP_033863941.1_17728	k119_647929:4292-11755	0.2901	0.0206	0.0711
348	lcl|NC_048359.1_prot_XP_033853116.1_54256	k119_1056965:4556-4948	0.2912	0.0067	0.0231
349	lcl|NC_048354.1_prot_XP_033912263.2_52212	k119_2650198:1374-2387	0.2916	0.0036	0.0123
350	lcl|NC_048362.1_prot_XP_033903638.2_55566	k119_4530603:1-2597	0.2919	0.0212	0.0727
351	lcl|NC_048337.1_prot_XP_033907626.2_30586	k119_2120499:1000-6939	0.2927	0.0076	0.0258
352	lcl|NC_048332.1_prot_XP_033873859.2_21320	k119_3264201:151-3536	0.2937	0.0268	0.0911
353	lcl|NC_048333.1_prot_XP_033885311.2_23737	k119_157102:4545-8092	0.2969	0.0053	0.0178
354	lcl|NC_048333.1_prot_XP_033884417.2_23689	k119_4587713:682-1962	0.2972	0.0041	0.0138
355	lcl|NC_048337.1_prot_XP_033877753.1_31205	k119_2630777:1273-2407	0.2982	0.0054	0.0182
356	lcl|NC_048346.1_prot_XP_034761205.1_44139	k119_41455:14-6110	0.2997	0.0177	0.0592
357	lcl|NC_048350.1_prot_XP_034763839.1_48596	k119_871774:973-3711	0.3005	0.0291	0.0968
358	lcl|NC_048331.1_prot_XP_034779926.1_20904	k119_3960944:2335-3386	0.3015	0.004	0.0133
359	lcl|NC_048343.1_prot_XP_034759498.1_39574	k119_251131:3888-4784	0.304	0.0277	0.091
360	lcl|NC_048334.1_prot_XP_034780921.1_25383	k119_3965908:1449-4187	0.3059	0.0117	0.0381
361	lcl|NC_048345.1_prot_XP_033909524.2_42377	k119_3222776:1480-3747	0.3059	0.0095	0.0309
362	lcl|NC_048324.1_prot_XP_033869941.1_4394	k119_1436309:1-7793	0.3082	0.0055	0.0178
363	lcl|NC_048346.1_prot_XP_033893844.2_43208	k119_3411590:1-6790	0.3093	0.005	0.0163
364	lcl|NW_023260695.1_prot_XP_033900241.2_60907	k119_2123348:1160-5351	0.3097	0.0207	0.0668
365	lcl|NC_048339.1_prot_XP_033896170.2_33775	k119_2954036:1200-2694	0.3103	0.004	0.0128
366	lcl|NC_048347.1_prot_XP_033878951.2_45387	k119_2194918:648-2762	0.3119	0.0084	0.027
367	lcl|NC_048346.1_prot_XP_034761159.1_43145	k119_4139163:1-3340	0.3123	0.0042	0.0135
368	lcl|NW_023263418.1_prot_XP_034775068.1_65266	k119_3411368:1-8961	0.3125	0.0306	0.098
369	lcl|NC_048346.1_prot_XP_034761335.1_43241	k119_3226194:1-5328	0.316	0.0088	0.0278
370	lcl|NC_048329.1_prot_XP_033880460.2_16711	k119_2024096:610-4172	0.3171	0.0069	0.0217
371	lcl|NC_048335.1_prot_XP_033886008.1_28638	k119_4946582:1-3104	0.3174	0.0105	0.0329
372	lcl|NC_048323.1_prot_XP_033891535.2_378	k119_4008309:3902-9053	0.3204	0.0058	0.0181
373	lcl|NC_048334.1_prot_XP_034781278.1_25384	k119_2370531:1-8507	0.3212	0.0144	0.0449
374	lcl|NC_048329.1_prot_XP_033883104.2_15394	k119_2652592:1-1612	0.3237	0.0207	0.0641
375	lcl|NC_048350.1_prot_XP_034764163.1_49137	k119_4614713:200-1556	0.325	0.0636	0.1956
376	lcl|NC_048351.1_prot_XP_034764378.1_50013	k119_1951978:1-5002	0.3256	0.0133	0.0408
377	lcl|NC_048343.1_prot_XP_034759571.1_39585	k119_3974668:5248-7470	0.3278	0.0083	0.0253
378	lcl|NC_048350.1_prot_XP_034763816.1_48128	k119_2211805:2241-2791	0.3308	0.0065	0.0198
379	lcl|NC_048359.1_prot_XP_034766953.1_53932	k119_292191:7806-20712	0.3329	0.0664	0.1996
380	lcl|NC_048338.1_prot_XP_033851039.2_31746	k119_4589786:4238-6423	0.3335	0.0087	0.026
381	lcl|NC_048353.1_prot_XP_033911230.1_51362	k119_3202899:1593-9755	0.3347	0.008	0.024
382	lcl|NC_048334.1_prot_XP_033900270.2_25496	k119_251608:330-4370	0.338	0.0087	0.0256
383	lcl|NC_048346.1_prot_XP_033893723.2_43633	k119_1359397:120-4549	0.3406	0.0082	0.0242
384	lcl|NC_048326.1_prot_XP_033849357.2_8613	k119_2780069:843-3667	0.3411	0.0164	0.048
385	lcl|NC_048340.1_prot_XP_033895469.2_35911	k119_4496521:1-4047	0.3412	0.0048	0.0141
386	lcl|NC_048340.1_prot_XP_033893996.2_36041	k119_66633:1-5029	0.3429	0.0083	0.0242
387	lcl|NC_048333.1_prot_XP_033884198.1_24398	k119_4672216:1534-3762	0.3455	0.0098	0.0285
388	lcl|NW_023261448.1_prot_XP_033883529.1_62787	k119_1366854:1-1659	0.3462	0.0048	0.0138
389	lcl|NC_048325.1_prot_XP_033856129.2_6651	k119_358549:3423-7727	0.3474	0.0037	0.0107
390	lcl|NC_048337.1_prot_XP_033907876.1_30689	k119_4608872:158-11527	0.3478	0.0495	0.1422
391	lcl|NC_048333.1_prot_XP_033885442.2_24753	k119_3246052:2175-3734	0.3479	0.027	0.0777
392	lcl|NC_048366.1_prot_XP_034769188.1_57027	k119_4588099:1-2503	0.3487	0.0071	0.0203
393	lcl|NC_048323.1_prot_XP_033890797.1_557	k119_4555659:1313-4282	0.3488	0.0051	0.0147
394	lcl|NC_048342.1_prot_XP_033875998.2_38327	k119_4510196:171-4449	0.3516	0.0115	0.0327
395	lcl|NC_048350.1_prot_XP_033905017.1_48872	k119_3411649:221-5509	0.3524	0.1197	0.3397
396	lcl|NC_048342.1_prot_XP_033875847.2_38268	k119_2981900:1-3308	0.3528	0.0235	0.0667
397	lcl|NC_048337.1_prot_XP_033908128.1_31591	k119_650626:1-1194	0.3552	0.0734	0.2068
398	lcl|NC_048347.1_prot_XP_033879776.1_44859	k119_4546186:1-4105	0.3556	0.0111	0.0313
399	lcl|NC_048336.1_prot_XP_033881543.1_30140	k119_4251513:1-3666	0.3557	0.0298	0.0839
400	lcl|NC_048324.1_prot_XP_033861531.2_3388	k119_2692257:2193-4703	0.3559	0.0063	0.0177
401	lcl|NC_048342.1_prot_XP_034758722.1_38856	k119_3537614:67-5397	0.3583	0.024	0.0671
402	lcl|NC_048323.1_prot_XP_033890063.2_626	k119_203719:1-7556	0.3585	0.0067	0.0188
403	lcl|NC_048341.1_prot_XP_034758095.1_37281	k119_91185:1-1928	0.361	0.0341	0.0943
404	lcl|NC_048344.1_prot_XP_034760223.1_41618	k119_1941956:627-2829	0.3632	0.009	0.0247
405	lcl|NC_048343.1_prot_XP_033906176.1_40369	k119_776086:584-2110	0.3639	0.0367	0.1008
406	lcl|NC_048359.1_prot_XP_033850704.2_54273	k119_2633926:3112-8220	0.3643	0.0285	0.0783
407	lcl|NC_048333.1_prot_XP_033884175.2_23528	k119_3282536:1226-2992	0.3645	0.1115	0.3058
408	lcl|NC_048341.1_prot_XP_033902033.2_37611	k119_2068370:4111-5876	0.3662	0.0909	0.2482
409	lcl|NC_048334.1_prot_XP_034781099.1_25664	k119_210120:1-4171	0.3684	0.0322	0.0875
410	lcl|NC_048328.1_prot_XP_033873056.2_12518	k119_3881832:1-6588	0.3701	0.0236	0.0637
411	lcl|NW_023261448.1_prot_XP_034773175.1_62784	k119_2581072:1321-4822	0.3718	0.009	0.0241
412	lcl|NC_048331.1_prot_XP_033864600.1_21052	k119_3024:3443-5224	0.3739	0.0112	0.03
413	lcl|NC_048333.1_prot_XP_033884182.2_24683	k119_4490578:1608-11303	0.3744	0.007	0.0187
414	lcl|NC_048349.1_prot_XP_034763532.1_48004	k119_2821412:1223-4376	0.3748	0.0128	0.0342
415	lcl|NC_048329.1_prot_XP_033881548.1_16625	k119_102084:700-11232	0.3784	0.0641	0.1694
416	lcl|NC_048329.1_prot_XP_033881079.2_16332	k119_2051594:1-3812	0.379	0.0049	0.0129
417	lcl|NC_048335.1_prot_XP_033887130.1_28737	k119_2036190:2743-6494	0.3807	0.0076	0.0198
418	lcl|NC_048350.1_prot_XP_034764222.1_48134	k119_2563543:1261-2247	0.3839	0.0679	0.1768
419	lcl|NC_048350.1_prot_XP_033910568.2_48310	k119_2768091:1-2634	0.3844	0.0186	0.0485
420	lcl|NC_048344.1_prot_XP_033898207.1_41120	k119_686574:1-3601	0.3845	0.0223	0.0581
421	lcl|NC_048351.1_prot_XP_033878021.2_50291	k119_1466939:1-3219	0.3846	0.0073	0.0191
422	lcl|NC_048325.1_prot_XP_033855963.2_6124	k119_4710077:3052-5023	0.3858	0.0201	0.0522
423	lcl|NC_048323.1_prot_XP_034780552.1_2279	k119_2828102:125-3944	0.3858	0.0099	0.0256
424	lcl|NC_048370.1_prot_XP_033857195.2_58358	k119_4508950:1507-2980	0.3871	0.0887	0.2292
425	lcl|NW_023263870.1_prot_XP_034776185.1_66770	k119_4644496:9007-10309	0.3885	0.0084	0.0216
426	lcl|NC_048349.1_prot_XP_033904564.2_47200	k119_4482848:1-4048	0.3901	0.0051	0.013
427	lcl|NC_048328.1_prot_XP_033875169.1_12574	k119_2570240:3621-5399	0.3905	0.0068	0.0174
428	lcl|NC_048337.1_prot_XP_034782558.1_30344	k119_3234064:4096-6939	0.3908	0.0044	0.0113
429	lcl|NW_023262904.1_prot_XP_033870114.1_64278	k119_4546528:2924-4779	0.3915	0.0088	0.0225
430	lcl|NC_048328.1_prot_XP_033872792.1_13258	k119_3979793:1-12344	0.4008	0.0081	0.0202
431	lcl|NC_048324.1_prot_XP_033869403.2_5104	k119_2269466:1-8027	0.4057	0.0331	0.0815
432	lcl|NC_048336.1_prot_XP_033889451.1_29099	k119_3209247:4422-5976	0.406	0.0067	0.0165
433	lcl|NC_048350.1_prot_XP_033901124.2_49337	k119_2044003:34-3892	0.4077	0.0417	0.1023
434	lcl|NC_048323.1_prot_XP_033890598.2_685	k119_2682090:1-3682	0.4109	0.0173	0.0421
435	lcl|NC_048363.1_prot_XP_034768399.1_56056	k119_3321924:370-6388	0.4113	0.0275	0.0669
436	lcl|NC_048323.1_prot_XP_033891310.2_1175	k119_920031:1407-21619	0.4115	0.072	0.175
437	lcl|NC_048330.1_prot_XP_033866309.1_18519	k119_1134943:5654-6829	0.4127	0.0075	0.0182
438	lcl|NC_048341.1_prot_XP_034757867.1_37508	k119_4772373:10-2839	0.4146	0.0252	0.0607
439	lcl|NC_048351.1_prot_XP_033908144.1_49569	k119_2573823:423-3694	0.4185	0.0168	0.0402
440	lcl|NC_048329.1_prot_XP_034778132.1_16329	k119_2311013:920-7229	0.4257	0.0068	0.0159
441	lcl|NC_048341.1_prot_XP_034757928.1_37529	k119_2369379:1-11414	0.4266	0.0081	0.019
442	lcl|NC_048326.1_prot_XP_033915149.2_8661	k119_156723:1-9256	0.4267	0.1031	0.2416
443	lcl|NC_048355.1_prot_XP_033850083.2_52617	k119_3997794:38-4275	0.4289	0.2147	0.5006
444	lcl|NC_048334.1_prot_XP_033901532.1_26376	k119_1409412:1-2073	0.4319	0.0147	0.0341
445	lcl|NC_048326.1_prot_XP_033848134.2_8973	k119_4569250:2201-12607	0.4322	0.0436	0.1008
446	lcl|NC_048329.1_prot_XP_033881411.1_16699	k119_50958:6467-9847	0.4345	0.0076	0.0174
447	lcl|NC_048340.1_prot_XP_033894441.1_35578	k119_2591358:2513-5387	0.4354	0.0069	0.016
448	lcl|NC_048323.1_prot_XP_034780833.1_2422	k119_3385630:7611-10082	0.4356	0.0353	0.081
449	lcl|NC_048340.1_prot_XP_033894552.1_36226	k119_2588210:1497-3152	0.436	0.0063	0.0145
450	lcl|NC_048335.1_prot_XP_033887630.2_28208	k119_2040784:833-2428	0.437	0.0229	0.0524
451	lcl|NC_048341.1_prot_XP_033903587.1_37194	k119_4718725:885-1643	0.4371	0.0065	0.0149
452	lcl|NC_048342.1_prot_XP_033875843.1_38270	k119_2046749:1-1206	0.44	0.0054	0.0122
453	lcl|NC_048361.1_prot_XP_034767797.1_54888	k119_15694:38-8893	0.4409	0.0168	0.0381
454	lcl|NC_048330.1_prot_XP_033867534.2_17418	k119_2866346:4596-5468	0.4458	0.0081	0.0183
455	lcl|NC_048350.1_prot_XP_034764066.1_48369	k119_976331:212-4306	0.4474	0.019	0.0425
456	lcl|NC_048324.1_prot_XP_033870225.2_5341	k119_4865738:1-4249	0.4494	0.0648	0.1443
457	lcl|NC_048324.1_prot_XP_033862268.2_3051	k119_3324052:1-5174	0.4503	0.0082	0.0182
458	lcl|NC_048324.1_prot_XP_033861813.1_3123	k119_658349:158-1598	0.4505	0.0048	0.0106
459	lcl|NC_048341.1_prot_XP_033902611.2_37492	k119_807685:861-2620	0.4509	0.0719	0.1594
460	lcl|NC_048335.1_prot_XP_033887558.2_27535	k119_93217:1-1293	0.4518	0.0552	0.1222
461	lcl|NC_048363.1_prot_XP_034768464.1_56165	k119_2688001:584-4021	0.4541	0.0456	0.1004
462	lcl|NC_048361.1_prot_XP_034767865.1_54966	k119_2776665:539-4580	0.4575	0.0217	0.0473
463	lcl|NC_048344.1_prot_XP_033897575.1_40973	k119_359733:215-5113	0.4583	0.1906	0.4159
464	lcl|NC_048346.1_prot_XP_033886278.2_44365	k119_679834:216-4681	0.4596	0.0235	0.0511
465	lcl|NC_048345.1_prot_XP_034760976.1_42033	k119_2795984:539-2359	0.4617	0.0546	0.1182
466	lcl|NC_048323.1_prot_XP_033891901.1_1289	k119_4093183:3464-6612	0.4654	0.0211	0.0454
467	lcl|NC_048327.1_prot_XP_033861340.2_10651	k119_2717927:622-8995	0.4698	0.0207	0.0441
468	lcl|NC_048323.1_prot_XP_034781898.1_2794	k119_324851:1-6138	0.4704	0.0106	0.0226
469	lcl|NC_048340.1_prot_XP_033894560.2_34996	k119_4128924:825-4787	0.4713	0.0139	0.0294
470	lcl|NC_048328.1_prot_XP_033873728.1_13497	k119_268507:103-1997	0.4724	0.0988	0.2093
471	lcl|NC_048335.1_prot_XP_033886164.2_27147	k119_2934834:1153-5651	0.4728	0.0387	0.0819
472	lcl|NC_048329.1_prot_XP_033881572.2_16558	k119_2721041:1-1915	0.4732	0.0705	0.149
473	lcl|NC_048330.1_prot_XP_033866484.1_18248	k119_111479:1-5966	0.4741	0.034	0.0717
474	lcl|NC_048352.1_prot_XP_033850734.2_51078	k119_1619542:225-929	0.476	0.005	0.0105
475	lcl|NC_048328.1_prot_XP_033875117.1_12980	k119_2593570:1177-10224	0.4766	0.0126	0.0264
476	lcl|NC_048342.1_prot_XP_033907214.1_38507	k119_3287010:1-2652	0.4784	0.0124	0.0258
477	lcl|NC_048327.1_prot_XP_033861090.2_11920	k119_1405884:1258-11334	0.4786	0.0286	0.0598
478	lcl|NC_048328.1_prot_XP_033874499.1_14264	k119_1819283:2626-4168	0.4788	0.006	0.0125
479	lcl|NC_048330.1_prot_XP_033866755.1_18177	k119_747789:9198-12478	0.4827	0.0278	0.0577
480	lcl|NC_048341.1_prot_XP_033902051.2_37787	k119_2729085:358-8574	0.4827	0.1087	0.2251
481	lcl|NC_048351.1_prot_XP_034764600.1_50104	k119_3559642:1-6827	0.4841	0.0476	0.0984
482	lcl|NC_048350.1_prot_XP_034763789.1_48312	k119_4285887:1-6680	0.4853	0.0405	0.0834
483	lcl|NC_048335.1_prot_XP_033886638.2_28150	k119_59045:1592-5915	0.4861	0.027	0.0555
484	lcl|NC_048332.1_prot_XP_033875744.1_21647	k119_3938348:1-8884	0.4868	0.0057	0.0117
485	lcl|NC_048328.1_prot_XP_033874981.1_12995	k119_1341762:483-9947	0.4868	0.0803	0.165
486	lcl|NC_048351.1_prot_XP_034764463.1_49988	k119_353428:22-4318	0.4891	0.0207	0.0423
487	lcl|NC_048340.1_prot_XP_034784466.1_35410	k119_2108201:8973-10789	0.4907	0.0914	0.1862
488	lcl|NC_048328.1_prot_XP_033873050.2_12612	k119_4010973:7393-14114	0.4912	0.0058	0.0119
489	lcl|NC_048337.1_prot_XP_033907512.1_30611	k119_4634586:3581-6572	0.494	0.0069	0.014
490	lcl|NC_048350.1_prot_XP_034763583.1_49159	k119_4480166:931-5237	0.4958	0.1459	0.2943
491	lcl|NC_048347.1_prot_XP_034762065.1_45330	k119_53190:39-6764	0.496	0.0253	0.051
492	lcl|NC_048341.1_prot_XP_034757320.1_36892	k119_3902641:1228-4411	0.5014	0.0743	0.1483
493	lcl|NC_048325.1_prot_XP_033856175.1_6941	k119_130493:870-3555	0.5022	0.0054	0.0108
494	lcl|NC_048340.1_prot_XP_033894500.1_35257	k119_3925588:816-15862	0.506	0.0636	0.1257
495	lcl|NC_048350.1_prot_XP_033898857.2_48196	k119_1821454:74-1358	0.5064	0.0302	0.0596
496	lcl|NC_048338.1_prot_XP_034783440.1_33117	k119_113346:1582-3641	0.508	0.0273	0.0538
497	lcl|NC_048338.1_prot_XP_033892207.1_31872	k119_3836448:390-5160	0.511	0.0571	0.1118
498	lcl|NW_023263227.1_prot_XP_034774621.1_64595	k119_3614683:1-1784	0.511	0.0442	0.0866
499	lcl|NC_048334.1_prot_XP_034780999.1_25546	k119_863730:1435-4029	0.5119	0.019	0.0371
500	lcl|NC_048328.1_prot_XP_033873413.1_13081	k119_2134844:158-7038	0.5155	0.0529	0.1026
501	lcl|NC_048370.1_prot_XP_033857220.1_58622	k119_156665:157-2371	0.5186	0.0459	0.0885
502	lcl|NC_048361.1_prot_XP_034767665.1_54916	k119_1065262:1-5969	0.5191	0.044	0.0847
503	lcl|NC_048333.1_prot_XP_033885423.2_23869	k119_471492:94-3166	0.5205	0.0454	0.0872
504	lcl|NC_048324.1_prot_XP_033870230.2_4138	k119_3598847:246-3055	0.5269	0.0196	0.0373
505	lcl|NC_048343.1_prot_XP_034759549.1_39688	k119_1973261:1-8871	0.5291	0.0739	0.1398
506	lcl|NC_048350.1_prot_XP_034763726.1_48497	k119_676312:984-8955	0.5318	0.0926	0.1741
507	lcl|NC_048329.1_prot_XP_033881096.1_15433	k119_2072792:561-4347	0.5333	0.1311	0.2458
508	lcl|NC_048324.1_prot_XP_033869431.2_5400	k119_4494345:1-9393	0.535	0.0834	0.1558
509	lcl|NC_048349.1_prot_XP_033907399.2_47091	k119_109798:1692-3339	0.5351	0.0314	0.0587
510	lcl|NC_048330.1_prot_XP_034778627.1_17822	k119_3293316:144-12304	0.5392	0.011	0.0205
511	lcl|NC_048342.1_prot_XP_033877056.2_38412	k119_4518466:1-1516	0.5417	0.2148	0.3965
512	lcl|NC_048332.1_prot_XP_034780230.1_21716	k119_3296642:5502-10358	0.542	0.0835	0.1541
513	lcl|NC_048323.1_prot_XP_034779988.1_1968	k119_3334160:2637-7341	0.5436	0.042	0.0773
514	lcl|NC_048351.1_prot_XP_033877507.2_49957	k119_3883055:163-4984	0.545	0.3439	0.6311
515	lcl|NC_048325.1_prot_XP_033854579.2_8036	k119_438371:182-5141	0.5452	0.2662	0.4883
516	lcl|NC_048351.1_prot_XP_033878915.1_50392	k119_1371748:1-4078	0.5455	0.047	0.0861
517	lcl|NC_048361.1_prot_XP_034767830.1_54815	k119_762222:1514-4347	0.5458	0.0072	0.0132
518	lcl|NC_048359.1_prot_XP_033848790.1_54465	k119_143557:1-4783	0.5525	0.363	0.6571
519	lcl|NC_048342.1_prot_XP_034758606.1_39226	k119_2019675:52-5314	0.553	0.0936	0.1693
520	lcl|NC_048340.1_prot_XP_034784437.1_35552	k119_1468647:5922-15467	0.556	0.0212	0.0382
521	lcl|NC_048362.1_prot_XP_033903953.1_55610	k119_539629:93-1727	0.5579	0.1059	0.1899
522	lcl|NC_048336.1_prot_XP_033888362.2_29075	k119_634105:555-2253	0.562	0.0672	0.1197
523	lcl|NC_048364.1_prot_XP_034768555.1_56402	k119_1462779:6576-12604	0.5634	0.0371	0.0658
524	lcl|NC_048345.1_prot_XP_033909635.2_42275	k119_756905:1123-3300	0.5677	0.0105	0.0184
525	lcl|NC_048332.1_prot_XP_033864403.1_22411	k119_804562:782-4642	0.5678	0.1457	0.2567
526	lcl|NC_048336.1_prot_XP_033889491.1_29418	k119_1360484:147-3476	0.5695	0.0079	0.0138
527	lcl|NC_048359.1_prot_XP_033915171.2_54049	k119_2649578:59-7030	0.5714	0.1158	0.2027
528	lcl|NC_048337.1_prot_XP_034782450.1_30587	k119_2120499:8061-15669	0.5728	0.0116	0.0203
529	lcl|NC_048345.1_prot_XP_033909111.1_42738	k119_2134710:510-4184	0.5763	0.0675	0.1172
530	lcl|NC_048347.1_prot_XP_034762573.1_44684	k119_4627970:1-2197	0.5789	0.0382	0.066
531	lcl|NW_023263911.1_prot_XP_034776286.1_66888	k119_129989:50-11761	0.5804	0.0606	0.1044
532	lcl|NC_048352.1_prot_XP_033892899.2_50804	k119_2847484:1626-3810	0.585	0.0252	0.0431
533	lcl|NC_048328.1_prot_XP_033874445.2_12716	k119_4640168:444-9144	0.585	0.0346	0.0591
534	lcl|NC_048359.1_prot_XP_033914281.2_54268	k119_9487:523-4083	0.5878	0.0631	0.1073
535	lcl|NC_048342.1_prot_XP_033876952.2_38565	k119_2957371:265-9610	0.5884	0.0432	0.0735
536	lcl|NC_048335.1_prot_XP_033887527.1_28084	k119_1022264:1990-3350	0.5909	0.168	0.2843
537	lcl|NC_048352.1_prot_XP_033892660.2_50649	k119_4484323:1296-4292	0.5943	0.0091	0.0154
538	lcl|NC_048361.1_prot_XP_033857667.2_54831	k119_3222165:1-5645	0.5948	0.0279	0.0469
539	lcl|NC_048331.1_prot_XP_034779317.1_21156	k119_3423762:1-12676	0.5953	0.0367	0.0617
540	lcl|NC_048328.1_prot_XP_033873808.1_13148	k119_13159:109-4638	0.6012	0.0558	0.0929
541	lcl|NC_048323.1_prot_XP_033890525.1_663	k119_3960706:1-3404	0.6038	0.0128	0.0212
542	lcl|NC_048326.1_prot_XP_033915107.2_8781	k119_1995361:1-6682	0.6044	0.0215	0.0355
543	lcl|NC_048344.1_prot_XP_033898165.2_40950	k119_4276239:192-1352	0.6125	0.1324	0.2162
544	lcl|NC_048327.1_prot_XP_033859046.1_11830	k119_1399076:899-4633	0.6134	0.0729	0.1188
545	lcl|NC_048324.1_prot_XP_033870808.2_3821	k119_1929067:126-11102	0.6167	0.3214	0.5212
546	lcl|NC_048344.1_prot_XP_033899073.2_41091	k119_4519471:3556-10404	0.6226	0.0535	0.086
547	lcl|NC_048357.1_prot_XP_034766583.1_53316	k119_1965019:1-4162	0.6236	0.1015	0.1628
548	lcl|NC_048339.1_prot_XP_033896888.1_34517	k119_1129089:5121-7449	0.628	0.0278	0.0443
549	lcl|NW_023263564.1_prot_XP_033875950.2_65898	k119_2359389:243-961	0.6304	0.1422	0.2255
550	lcl|NC_048359.1_prot_XP_033849486.2_54254	k119_3837748:1-15842	0.632	0.0474	0.0749
551	lcl|NC_048328.1_prot_XP_033873567.1_13121	k119_1787399:48-1428	0.6386	0.0534	0.0835
552	lcl|NC_048362.1_prot_XP_034768291.1_55453	k119_4736522:1198-6901	0.6419	0.084	0.1309
553	lcl|NC_048339.1_prot_XP_033896518.2_34220	k119_169285:1219-7960	0.6443	0.0152	0.0237
554	lcl|NC_048340.1_prot_XP_033894497.1_35407	k119_1338597:511-4482	0.6478	0.1119	0.1728
555	lcl|NC_048361.1_prot_XP_034767526.1_55190	k119_4739373:392-3267	0.6486	0.036	0.0555
556	lcl|NC_048328.1_prot_XP_034777624.1_13253	k119_3496195:1-4730	0.6509	0.0283	0.0436
557	lcl|NC_048340.1_prot_XP_033894606.1_35176	k119_1026343:72-2684	0.6513	0.1039	0.1596
558	lcl|NC_048350.1_prot_XP_034763621.1_49158	k119_4033507:130-4920	0.6524	0.076	0.1165
559	lcl|NC_048329.1_prot_XP_034778135.1_17085	k119_2841200:179-5466	0.6546	0.0866	0.1323
560	lcl|NC_048347.1_prot_XP_033875334.1_45266	k119_251881:283-2628	0.6551	0.0819	0.1251
561	lcl|NC_048346.1_prot_XP_034761788.1_44436	k119_1305626:7-6289	0.6555	0.0374	0.057
562	lcl|NC_048330.1_prot_XP_033863840.2_17108	k119_1080387:1752-4173	0.6615	0.0239	0.0361
563	lcl|NW_023263564.1_prot_XP_033879027.1_65798	k119_416363:1-4143	0.6615	0.0249	0.0376
564	lcl|NC_048330.1_prot_XP_033867024.1_18816	k119_4560362:99-3117	0.664	0.121	0.1823
565	lcl|NC_048324.1_prot_XP_034758854.1_3561	k119_3224589:974-4924	0.6647	0.1412	0.2124
566	lcl|NC_048325.1_prot_XP_033856978.1_6596	k119_3886587:9115-10059	0.6647	0.0098	0.0147
567	lcl|NC_048340.1_prot_XP_033894949.1_35574	k119_2822793:874-2524	0.6648	0.0533	0.0802
568	lcl|NC_048335.1_prot_XP_033887529.2_28503	k119_3302190:350-1492	0.6667	0.0921	0.1381
569	lcl|NC_048330.1_prot_XP_034778607.1_17646	k119_1336275:6318-14330	0.6677	0.0366	0.0548
570	lcl|NW_023263707.1_prot_XP_034775773.1_66236	k119_3319983:5205-7167	0.6694	0.0756	0.113
571	lcl|NC_048332.1_prot_XP_033863131.1_22641	k119_2945425:2245-5841	0.6726	0.0396	0.0588
572	lcl|NC_048334.1_prot_XP_034780846.1_26980	k119_1153586:216-2323	0.673	0.0591	0.0878
573	lcl|NC_048330.1_prot_XP_033866458.2_18222	k119_1064059:329-7919	0.6773	0.0265	0.0391
574	lcl|NC_048323.1_prot_XP_033890093.2_1799	k119_74303:2118-4390	0.6787	0.0294	0.0433
575	lcl|NW_023261437.1_prot_XP_033902618.1_62698	k119_3385077:911-4874	0.6812	0.0689	0.1011
576	lcl|NW_023260775.1_prot_XP_034771894.1_61193	k119_2623022:5104-6819	0.6852	0.1669	0.2435
577	lcl|NC_048344.1_prot_XP_033897502.2_40801	k119_1280357:1-5209	0.6872	0.0083	0.0121
578	lcl|NC_048351.1_prot_XP_034764356.1_49453	k119_737887:4896-9706	0.6904	0.0419	0.0607
579	lcl|NC_048351.1_prot_XP_034764681.1_50228	k119_3578197:370-3371	0.6919	0.0112	0.0162
580	lcl|NC_048341.1_prot_XP_033899295.2_37865	k119_4643792:1-5816	0.6923	0.0279	0.0403
581	lcl|NC_048327.1_prot_XP_033859321.1_11804	k119_809751:876-9230	0.6924	0.0887	0.1281
582	lcl|NC_048323.1_prot_XP_033891311.1_1174	k119_2687700:128-6120	0.6961	0.0389	0.0559
583	lcl|NC_048332.1_prot_XP_033879551.2_22650	k119_1645851:1-3829	0.7043	0.0314	0.0446
584	lcl|NW_023262904.1_prot_XP_033869816.1_64296	k119_1404570:323-6757	0.7154	0.1274	0.178
585	lcl|NC_048328.1_prot_XP_033874109.2_12643	k119_207173:489-6978	0.7168	0.1168	0.163
586	lcl|NC_048342.1_prot_XP_033904218.2_38980	k119_734460:1-4069	0.7172	0.0078	0.0109
587	lcl|NC_048350.1_prot_XP_033911214.1_48489	k119_2764812:309-2142	0.72	0.1263	0.1754
588	lcl|NC_048340.1_prot_XP_034784702.1_35414	k119_3681717:1012-21217	0.7213	0.1411	0.1957
589	lcl|NC_048328.1_prot_XP_034777652.1_13926	k119_2703060:7118-14478	0.7242	0.1324	0.1828
590	lcl|NC_048350.1_prot_XP_033906626.1_48274	k119_3490008:727-5348	0.7292	0.1382	0.1895
591	lcl|NC_048325.1_prot_XP_033855036.1_6268	k119_1932771:526-6897	0.7305	0.0321	0.0439
592	lcl|NC_048336.1_prot_XP_034782137.1_29907	k119_4564556:1423-8579	0.7307	0.0804	0.1101
593	lcl|NC_048341.1_prot_XP_034758085.1_37230	k119_790040:1177-1731	0.7404	0.0173	0.0234
594	lcl|NC_048337.1_prot_XP_033907481.1_30475	k119_117229:8063-10174	0.7407	0.1082	0.1461
595	lcl|NC_048328.1_prot_XP_033874305.1_12678	k119_1949922:3707-8597	0.7408	0.1412	0.1907
596	lcl|NC_048328.1_prot_XP_033873677.2_13305	k119_2564391:56-5761	0.7426	0.1443	0.1943
597	lcl|NC_048344.1_prot_XP_033897973.1_41288	k119_941443:1-3097	0.7471	0.0503	0.0673
598	lcl|NC_048359.1_prot_XP_033881880.2_54414	k119_2816807:1-4105	0.7522	0.0125	0.0166
599	lcl|NC_048330.1_prot_XP_033867305.1_18436	k119_3232206:185-2527	0.759	0.0357	0.0471
600	lcl|NC_048325.1_prot_XP_033855447.1_6594	k119_35614:852-7822	0.7747	0.1883	0.243
601	lcl|NC_048352.1_prot_XP_033892265.1_50746	k119_2606953:1-3804	0.7756	0.0439	0.0566
602	lcl|NC_048355.1_prot_XP_034765863.1_52567	k119_695491:758-2235	0.776	0.1848	0.2381
603	lcl|NC_048336.1_prot_XP_033889541.2_29130	k119_1532244:113-2699	0.7809	0.0152	0.0195
604	lcl|NC_048328.1_prot_XP_033874012.2_12602	k119_374217:36-9721	0.7813	0.0709	0.0907
605	lcl|NC_048350.1_prot_XP_033904070.1_48582	k119_474489:2390-5862	0.7855	0.2034	0.259
606	lcl|NC_048342.1_prot_XP_034759054.1_39309	k119_2645959:3666-9448	0.7862	0.026	0.033
607	lcl|NC_048333.1_prot_XP_033884624.1_23926	k119_3889365:98-5932	0.7929	0.1218	0.1536
608	lcl|NC_048323.1_prot_XP_033898138.2_2066	k119_1655986:1480-4039	0.7936	0.1332	0.1678
609	lcl|NC_048326.1_prot_XP_033848208.1_9561	k119_2062818:2991-7104	0.797	0.0504	0.0633
610	lcl|NC_048364.1_prot_XP_034768508.1_56437	k119_2293163:502-5663	0.8005	0.1119	0.1398
611	lcl|NC_048332.1_prot_XP_033868327.1_21601	k119_4569286:618-4515	0.8027	0.1868	0.2328
612	lcl|NC_048323.1_prot_XP_033862768.2_2560	k119_2033537:259-10088	0.8127	0.4106	0.5053
613	lcl|NC_048332.1_prot_XP_033875984.1_22151	k119_1307847:462-5936	0.8141	0.1932	0.2373
614	lcl|NC_048325.1_prot_XP_033854442.1_7424	k119_1929171:1473-4111	0.8183	0.1506	0.184
615	lcl|NC_048350.1_prot_XP_033901744.2_48225	k119_1954913:1-3037	0.8242	0.0448	0.0544
616	lcl|NC_048335.1_prot_XP_033886395.1_28396	k119_2231174:844-6219	0.8249	0.0337	0.0409
617	lcl|NC_048323.1_prot_XP_034782069.1_2818	k119_866397:27-3999	0.8309	0.2663	0.3205
618	lcl|NC_048323.1_prot_XP_033862785.1_2542	k119_680537:3038-6000	0.8321	0.1795	0.2157
619	lcl|NC_048331.1_prot_XP_034779209.1_21141	k119_4683496:764-2560	0.8344	0.1512	0.1812
620	lcl|NC_048325.1_prot_XP_033855221.2_7444	k119_89838:268-1337	0.8352	0.0438	0.0525
621	lcl|NC_048325.1_prot_XP_033856588.1_7146	k119_302145:240-9167	0.8366	0.1185	0.1416
622	lcl|NC_048337.1_prot_XP_033908772.1_30337	k119_2091952:4423-4959	0.8379	0.1297	0.1548
623	lcl|NC_048330.1_prot_XP_033866402.1_18074	k119_3225858:70-3398	0.8517	0.0414	0.0486
624	lcl|NC_048323.1_prot_XP_033869332.2_1654	k119_2362881:3198-5529	0.8523	0.0839	0.0984
625	lcl|NC_048340.1_prot_XP_033894557.1_35112	k119_2151477:3849-5887	0.854	0.045	0.0527
626	lcl|NW_023260902.1_prot_XP_034772122.1_61449	k119_313188:277-2532	0.8579	0.1461	0.1703
627	lcl|NC_048328.1_prot_XP_033872952.2_12819	k119_3411838:2337-11043	0.86	0.0553	0.0643
628	lcl|NC_048325.1_prot_XP_033856858.2_6581	k119_709348:716-4716	0.866	0.1407	0.1625
629	lcl|NC_048344.1_prot_XP_033899072.2_41092	k119_1928262:1-10090	0.8791	0.0635	0.0722
630	lcl|NC_048339.1_prot_XP_033896818.2_34173	k119_3533273:3037-5932	0.8798	0.0137	0.0156
631	lcl|NC_048323.1_prot_XP_033890491.1_408	k119_802551:156-4079	0.8837	0.0356	0.0403
632	lcl|NC_048329.1_prot_XP_033881146.1_15404	k119_215822:3279-7023	0.8851	0.0821	0.0927
633	lcl|NC_048329.1_prot_XP_033881325.2_15255	k119_3865507:2686-10430	0.8981	0.0953	0.1062
634	lcl|NC_048328.1_prot_XP_033873678.1_13113	k119_3321666:525-2738	0.9012	0.0211	0.0234
635	lcl|NW_023261119.1_prot_XP_034772588.1_62023	k119_3943092:1192-4377	0.9044	0.0364	0.0402
636	lcl|NC_048327.1_prot_XP_033859888.2_11301	k119_4697252:71-8767	0.9109	0.1014	0.1113
637	lcl|NC_048325.1_prot_XP_033855267.2_7010	k119_2569333:688-7175	0.9161	0.0103	0.0112
638	lcl|NC_048323.1_prot_XP_033891883.2_1220	k119_4673513:1-14012	0.9625	0.0338	0.0352
639	lcl|NC_048327.1_prot_XP_033860157.2_10714	k119_895502:104-4150	0.9706	0.1758	0.1811
640	lcl|NC_048347.1_prot_XP_034761991.1_45021	k119_2004138:3151-7107	0.9813	0.2021	0.206
641	lcl|NC_048339.1_prot_XP_033896430.2_33839	k119_4719842:2418-10389	0.9864	0.0659	0.0668
642	lcl|NC_048323.1_prot_XP_033891965.1_828	k119_2038842:3140-11702	0.9886	0.1742	0.1763
643	lcl|NC_048342.1_prot_XP_034758709.1_38240	k119_441433:1278-2417	0.9962	0.0362	0.0364
644	lcl|NW_023263783.1_prot_XP_034775933.1_66501	k119_712533:52-2149	1.0164	0.0338	0.0332
645	lcl|NC_048339.1_prot_XP_033896385.1_33805	k119_4807965:22-3292	1.0184	0.0138	0.0136
646	lcl|NC_048328.1_prot_XP_033873225.2_12712	k119_4478553:79-12365	1.0204	0.3121	0.3058
647	lcl|NC_048351.1_prot_XP_034764734.1_50151	k119_836274:1-4389	1.0623	0.0181	0.017
648	lcl|NC_048328.1_prot_XP_033873894.2_14052	k119_850594:780-1262	1.063	0.0107	0.0101
649	lcl|NC_048335.1_prot_XP_033886296.2_27350	k119_2201344:839-3635	1.1616	0.0874	0.0752
650	lcl|NC_048329.1_prot_XP_033883098.1_15253	k119_2925224:1164-5500	1.1638	0.0722	0.062
651	lcl|NC_048323.1_prot_XP_033890145.2_639	k119_2621298:634-5741	1.2812	0.0134	0.0105
652	lcl|NC_048327.1_prot_XP_033870305.1_10994	k119_2851926:448-2913	1.3594	0.0403	0.0296
653	lcl|NC_048324.1_prot_XP_033871096.1_4997	k119_4546674:2094-8561	1.3963	0.0963	0.069
654	lcl|NC_048333.1_prot_XP_033883375.2_24726	k119_4938386:5100-7655	1.4059	0.055	0.0392
655	lcl|NC_048323.1_prot_XP_034778426.1_1572	k119_4563735:1801-8140	1.4344	0.0241	0.0168
656	lcl|NC_048324.1_prot_XP_033871785.1_4764	k119_3283809:630-3113	1.6185	0.0927	0.0573
657	lcl|NC_048350.1_prot_XP_033905342.2_48311	k119_4285887:975-3520	4.6067	0.0473	0.0103

## Sheet: Table S6
Sex-linked variants								Male genotypes					Female genotypes					Coverage										Nearest gene
CHROM	POS	ID	REF	ALT	QUAL	TYPE	INFO	M1_qual_30	M3_qual_30	M5_qual_30	M7_qual_30	M9_qual_30	F1	F2	F4	F6	F8	F1	F2	F4	F6	F8	M1	M3	M5	M7	M9	Target name	Target start	Target end	Query header	Distance to the closest gene
CACTIG010000004.1	235611	.	G	C	228.213	SNP	AC=20;AD=9,6;ADF=4,4;ADR=5,2;AN=30;BQBZ=-0.852803;DP=219;DP4=25,34,103,47;FS=0;MQ=54;MQ0F=0;MQBZ=2.82843;MQSBZ=-1.41421;RPBZ=-1.1619;SCBZ=-2.82843;SGB=-0.651104;VDB=0.0326236;SNP;TV	1/1:193,16,0:9:0:0,6:1,2:1,8	1/1:255,9,0:25:10:0,17:2,6:2,23	1/1:233,42,0:14:0:0,12:0,2:0,14	1/1:255,51,0:17:0:0,12:0,5:0,17	1/1:255,36,0:28:11:0,20:2,6:2,26	0/1:155,0,71:.:.:.:.:.	0/1:129,0,21:.:.:.:.:.	0/1:116,0,207:.:.:.:.:.	0/1:207,0,11:.:.:.:.:.	0/1:127,0,175:.:.:.:.:.	14	7	18	15	19	10	31	18	18	34	CACTIG010000004.1	92902	296617	NC_048361.1|7613139|7809813|1|XM_034911753.1|XP_034767644.1|fer-1_like_family_member_6|196675	0
CACTIG010000004.1	263354	.	A	G	228.206	SNP	AC=18;AD=7,11;ADF=2,7;ADR=5,4;AN=26;BQBZ=0.316228;DP=215;DP4=9,46,117,38;FS=0;MQ=29;MQ0F=0;MQBZ=0.933257;MQSBZ=-0.933257;RPBZ=-0.29277;SCBZ=-2.23607;SGB=-0.590765;VDB=0.858134;SNP;TS	1/1:96,0,2:6:0:0,5:1,0:1,5	1/1:255,38,0:27:10:0,18:2,7:2,25	1/1:107,0,2:9:0:0,6:1,2:1,8	1/1:211,42,0:18:0:0,15:1,2:1,17	1/1:195,0,2:31:31:0,22:5,4:5,26	0/1:140,0,140:.:.:.:.:.	0/1:114,0,48:.:.:.:.:.	0/1:118,0,8:.:.:.:.:.	0/1:154,0,141:.:.:.:.:.	./.:.:.:.:.:.:.	16	12	10	18	6	6	29	9	21	32	CACTIG010000004.1	92902	296617	NC_048361.1|7613139|7809813|1|XM_034911753.1|XP_034767644.1|fer-1_like_family_member_6|196675	0
CACTIG010000005.1	553800	.	A	G	154.416	SNP	AC=20;AD=3,14;ADF=2,14;ADR=1,0;AN=30;BQBZ=-0.173115;DP=389;DP4=59,35,279,8;FS=0;MQ=24;MQ0F=0;MQBZ=-0.780948;MQSBZ=0.780948;RPBZ=-1.62578;SCBZ=0.179605;SGB=-0.689466;VDB=0.916456;SNP;TS	1/1:143,48,0:16:0:0,16:0,0:0,16	1/1:126,69,0:32:0:0,31:1,0:1,31	1/1:184,81,0:27:0:0,25:0,2:0,27	1/1:132,2,0:19:22:0,17:2,0:2,17	1/1:106,31,0:14:0:1,13:0,0:1,13	0/1:91,0,183:.:.:.:.:.	0/1:120,0,64:.:.:.:.:.	0/1:96,0,35:.:.:.:.:.	0/1:54,0,93:.:.:.:.:.	0/1:101,0,21:.:.:.:.:.	29	21	40	21	17	16	32	27	21	14	CACTIG010000005.1	509641	513949	NC_048358.1|8720190|8724527|-1|XM_034911041.1|XP_034766932.1|C-type_lectin_domain_family_4_member_G-like|4338	39851
CACTIG010000010.1	526870	.	AT	A	127.416	DEL	AC=18;AD=3,8;ADF=0,7;ADR=3,1;AN=26;DP=147;DP4=0,28,93,10;FS=0;IDV=19;IMF=1;MQ=35;MQ0F=0;MQBZ=2.35001;MQSBZ=-2.12132;RPBZ=1.43213;SCBZ=-1.27475;SGB=-0.69168;VDB=0.0119392;DEL;INDEL;TV	1/1:157,57,0:19:0:0,18:0,1:0,19	1/1:105,15,0:5:0:0,4:0,1:0,5	1/1:87,18,0:6:0:0,5:0,1:0,6	1/1:136,36,0:12:0:0,11:0,1:0,12	1/1:89,12,0:4:0:0,4:0,0:0,4	0/1:54,0,40:.:.:.:.:.	0/1:60,0,17:.:.:.:.:.	0/1:74,0,72:.:.:.:.:.	./.:.:.:.:.:.:.	0/1:93,0,39:.:.:.:.:.	12	12	14	18	14	19	6	6	13	4	CACTIG010000010.1	529378	543997	NC_048362.1|1031342|1049505|1|XM_034912075.1|XP_034767966.1|probable_ATP-dependent_RNA_helicase_DDX49|18164	2508
CACTIG010000011.1	467865	.	G	A	225.422	SNP	AC=20;AD=9,49;ADF=6,25;ADR=3,24;AN=30;BQBZ=-0.695457;DP=966;DP4=68,58,415,382;FS=0;MQ=59;MQ0F=0;MQBZ=-0.904937;MQSBZ=-0.912871;RPBZ=-0.0670544;SCBZ=0.428571;SGB=-0.693127;VDB=0.417249;SNP;TS	1/1:255,99,0:33:0:0,15:0,18:0,33	1/1:255,187,0:62:0:0,41:0,21:0,62	1/1:255,120,0:40:0:0,14:0,26:0,40	1/1:255,199,0:66:0:0,34:0,32:0,66	1/1:255,154,0:52:0:0,22:0,29:0,51	0/1:255,0,255:.:.:.:.:.	0/1:255,0,189:.:.:.:.:.	0/1:255,0,107:.:.:.:.:.	0/1:255,0,56:.:.:.:.:.	0/1:255,0,89:.:.:.:.:.	81	61	80	74	61	35	64	43	71	53	CACTIG010000011.1	453685	662343	NC_048344.1|28405037|28607577|-1|XM_034904396.1|XP_034760287.1|calmodulin-binding_transcription_activator_1-like,_transcript_variant_X2|202541	0
CACTIG010000011.1	899041	.	GA	G	200.416	DEL	AC=20;AD=9,10;ADF=7,5;ADR=2,5;AN=30;DP=337;DP4=62,46,147,46;FS=0;IDV=11;IMF=0.6875;MQ=60;MQ0F=0;RPBZ=0.907642;SCBZ=-0.689312;SGB=-0.688148;VDB=0.990498;DEL;INDEL;TV	1/1:223,45,0:15:0:0,10:0,5:0,15	1/1:191,19,0:18:7:2,12:2,2:4,14	1/1:200,16,0:26:3:5,16:0,5:5,21	1/1:230,63,0:21:0:0,18:0,3:0,21	1/1:154,15,0:15:0:3,11:0,1:3,12	0/1:97,0,24:.:.:.:.:.	0/1:131,0,8:.:.:.:.:.	0/1:43,0,41:.:.:.:.:.	0/1:200,0,8:.:.:.:.:.	0/1:167,0,20:.:.:.:.:.	31	16	27	29	27	19	25	27	31	17	CACTIG010000011.1	848090	915041	NC_048344.1|28154472|28222062|-1|XM_034041625.2|XP_033897516.1|paired_box_protein_Pax-7,_transcript_variant_X2|67591	0
CACTIG010000011.1	1047050	.	T	C	228.406	SNP	AC=20;AD=13,28;ADF=6,13;ADR=7,15;AN=30;BQBZ=1.02083;DP=542;DP4=35,48,144,296;FS=0;MQ=60;MQ0F=0;MQBZ=-0.471405;MQSBZ=1.32288;RPBZ=0.731603;SCBZ=0.643328;SGB=-0.692562;VDB=0.286154;SNP;TS	1/1:255,18,0:24:9:2,7:0,15:2,22	1/1:255,123,0:41:0:0,11:0,30:0,41	1/1:255,51,0:17:0:0,6:0,11:0,17	1/1:255,123,0:41:0:0,13:0,28:0,41	1/1:255,76,0:30:0:1,7:0,22:1,29	0/1:255,0,83:.:.:.:.:.	0/1:240,0,101:.:.:.:.:.	0/1:255,0,18:.:.:.:.:.	0/1:255,0,157:.:.:.:.:.	0/1:255,0,207:.:.:.:.:.	37	34	41	41	43	26	44	19	41	32	CACTIG010000011.1	1042915	1062629	NC_048344.1|28002987|28022492|-1|XM_034904439.1|XP_034760330.1|RING_finger_protein_207-like,_transcript_variant_X2|19506	0
CACTIG010000011.1	1462639	.	A	C	228.34	SNP	AC=18;AD=16,15;ADF=11,9;ADR=5,6;AN=26;BQBZ=2.38667;DP=676;DP4=42,35,85,80;FS=0;MQ=60;MQ0F=0;RPBZ=-1.63058;SCBZ=-2.38667;SGB=-0.680642;VDB=0.00224346;SNP;TV	1/1:200,36,0:12:0:0,11:0,1:0,12	1/1:255,36,0:12:0:0,7:0,5:0,12	1/1:255,51,0:17:0:0,7:0,10:0,17	1/1:255,39,0:13:0:0,6:0,7:0,13	1/1:255,35,0:16:0:0,6:1,9:1,15	./.:.:.:.:.:.:.	0/1:182,0,128:.:.:.:.:.	0/1:221,0,196:.:.:.:.:.	0/1:192,0,135:.:.:.:.:.	0/1:242,0,255:.:.:.:.:.	39	54	51	49	57	57	42	42	58	61	CACTIG010000011.1	1452587	1466966	NC_048344.1|27579642|27593400|1|XM_034042214.2|XP_033898105.2|rho_guanine_nucleotide_exchange_factor_16,_transcript_variant_X1|13759	0
CACTIG010000011.1	1688390	.	C	A	228.109	SNP	AC=20;AD=10,50;ADF=6,29;ADR=4,21;AN=30;BQBZ=-1.72734;DP=938;DP4=49,45,379,402;FS=0;MQ=60;MQ0F=0;RPBZ=0.111378;SCBZ=0.395782;SGB=-0.693147;VDB=0.0216745;SNP;TV	1/1:255,30,0:56:2:3,26:1,26:4,52	1/1:255,181,0:60:0:0,31:0,29:0,60	1/1:255,160,0:53:0:0,31:0,22:0,53	1/1:255,181,0:60:0:0,23:0,37:0,60	1/1:255,181,0:60:0:0,24:0,36:0,60	0/1:255,0,202:.:.:.:.:.	0/1:255,0,62:.:.:.:.:.	0/1:255,0,26:.:.:.:.:.	0/1:255,20,68:.:.:.:.:.	0/1:255,0,102:.:.:.:.:.	52	56	79	67	62	60	66	55	65	64	CACTIG010000011.1	1678765	1770555	NC_048345.1|1187611|1280583|1|XM_034042535.2|XP_033898426.2|protein_kinase_C_zeta_type,_transcript_variant_X1|92973	0
CACTIG010000011.1	1690227	.	A	T	228.416	SNP	AC=20;AD=7,58;ADF=3,30;ADR=4,28;AN=30;BQBZ=1.32831;DP=937;DP4=52,36,432,374;FS=0;MQ=60;MQ0F=0;RPBZ=0.184087;SCBZ=0.426143;SGB=-0.693147;VDB=0.130336;SNP;TV	1/1:255,33,0:61:0:3,29:2,27:5,56	1/1:255,166,0:55:0:0,29:0,26:0,55	1/1:255,132,0:44:0:0,22:0,22:0,44	1/1:255,148,0:55:0:1,31:0,23:1,54	1/1:255,196,0:65:0:0,41:0,24:0,65	0/1:255,0,72:.:.:.:.:.	0/1:255,0,46:.:.:.:.:.	0/1:255,0,82:.:.:.:.:.	0/1:255,0,79:.:.:.:.:.	0/1:255,0,28:.:.:.:.:.	66	63	73	59	70	65	56	50	61	72	CACTIG010000011.1	1678765	1770555	NC_048345.1|1187611|1280583|1|XM_034042535.2|XP_033898426.2|protein_kinase_C_zeta_type,_transcript_variant_X1|92973	0
CACTIG010000011.1	2788076	.	G	A	225.417	SNP	AC=20;AD=12,45;ADF=7,29;ADR=5,16;AN=30;BQBZ=-0.861477;DP=843;DP4=52,56,390,320;FS=0;MQ=59;MQ0F=0;MQBZ=-1.14469;MQSBZ=-0.933257;RPBZ=1.63975;SCBZ=0.724172;SGB=-0.693147;VDB=0.812212;SNP;TS	1/1:255,175,0:58:0:0,27:0,31:0,58	1/1:255,148,0:49:0:0,23:0,26:0,49	1/1:255,123,0:41:0:0,24:0,17:0,41	1/1:255,181,0:60:0:0,36:0,24:0,60	1/1:255,175,0:58:0:0,26:0,32:0,58	0/1:255,0,204:.:.:.:.:.	0/1:255,0,10:.:.:.:.:.	0/1:255,0,188:.:.:.:.:.	0/1:255,0,121:.:.:.:.:.	0/1:255,0,140:.:.:.:.:.	62	35	79	59	58	64	51	42	64	60	CACTIG010000011.1	2751984	2829768	NC_048345.1|2240886|2318091|1|XM_034905118.1|XP_034761009.1|nephrocystin-4,_transcript_variant_X1|77206	0
CACTIG010000011.1	4017904	.	G	A	228.404	SNP	AC=20;AD=7,17;ADF=3,11;ADR=4,6;AN=30;BQBZ=3.66552;DP=482;DP4=27,55,158,213;FS=0;MQ=40;MQ0F=0;MQBZ=2.32618;MQSBZ=0.809753;RPBZ=1.52608;SCBZ=1.43515;SGB=-0.692914;VDB=0.0674877;SNP;TS	1/1:255,0,0:31:2:3,10:3,15:6,25	1/1:246,33,0:33:15:3,8:0,22:3,30	1/1:255,75,0:25:0:0,10:0,15:0,25	1/1:255,57,0:38:0:1,16:1,20:2,36	1/1:237,21,0:25:0:1,9:2,13:3,22	0/1:158,0,84:.:.:.:.:.	0/1:192,0,7:.:.:.:.:.	0/1:198,0,16:.:.:.:.:.	0/1:246,0,78:.:.:.:.:.	0/1:168,0,35:.:.:.:.:.	24	39	27	33	28	35	34	27	47	29	CACTIG010000011.1	3990939	4049252	NC_048345.1|3395766|3480252|-1|XM_034904728.1|XP_034760619.1|kinesin-like_protein_KIF1B,_transcript_variant_X5|84487	0
CACTIG010000011.1	4541438	.	T	C,G	109.415	SNP	AC=16,12;AD=0,6,4;ADF=0,6,1;ADR=0,0,3;AN=30;BQBZ=1.57512;DP=163;DP4=12,10,72,67;FS=0;MQ=19;MQ0F=0;MQBZ=-1.62747;MQSBZ=-0.251256;RPBZ=-0.218218;SGB=-0.683931;VDB=0.870055;SNP;TS;TV	1/1:119,33,0,.,.,.:13:0:0,4,.:0,7,.:0,11,.	1/1:93,12,0,.,.,.:4:0:0,4,.:0,0,.:0,4,.	1/1:139,30,0,.,.,.:10:0:0,7,.:0,3,.:0,10,.	1/1:66,9,0,.,.,.:3:0:0,2,.:0,1,.:0,3,.	1/1:99,24,15,.,.,.:4:0:0,3,.:0,0,.:0,3,.	2/2:72,.,.,30,.,21:.:.:.:.:.	2/2:118,.,.,15,.,0:.:.:.:.:.	1/2:153,78,42,112,0,97:.:.:.:.:.	0/1:125,0,152,.,.,.:.:.:.:.:.	1/2:133,97,64,72,0,57:.:.:.:.:.	4	7	9	20	10	14	4	10	3	5	CACTIG010000011.1	4542729	4674695	NC_048345.1|3970575|4098578|1|XM_034904832.1|XP_034760723.1|arginine-glutamic_acid_dipeptide_repeats_protein-like,_transcript_variant_X2|128004	1291
CACTIG010000011.1	9011682	.	T	C	225.417	SNP	AC=20;AD=9,19;ADF=4,11;ADR=5,8;AN=30;BQBZ=1.09779;DP=402;DP4=36,44,161,138;FS=0;MQ=44;MQ0F=0;MQBZ=-2.61854;MQSBZ=0.919155;RPBZ=-0.282843;SCBZ=0.632456;SGB=-0.692976;VDB=0.82678;SNP;TS	1/1:255,78,0:26:0:0,14:0,12:0,26	1/1:255,78,0:26:0:0,13:0,13:0,26	1/1:255,57,0:19:0:0,12:0,7:0,19	1/1:255,78,0:26:0:0,14:0,12:0,26	1/1:255,66,0:22:0:0,13:0,9:0,22	0/1:208,0,84:.:.:.:.:.	0/1:228,0,174:.:.:.:.:.	0/1:255,0,123:.:.:.:.:.	0/1:255,0,197:.:.:.:.:.	0/1:255,0,177:.:.:.:.:.	15	27	26	39	31	30	29	22	26	24	CACTIG010000011.1	9006303	9033423	NC_048345.1|9961563|9988752|-1|XM_034053817.2|XP_033909708.1|cell_division_cycle_42,_transcript_variant_X1|27190	0
CACTIG010000011.1	9011860	.	A	G	225.417	SNP	AC=20;AD=6,29;ADF=2,16;ADR=4,13;AN=30;BQBZ=0.72111;DP=386;DP4=26,46,154,137;FS=0;MQ=58;MQ0F=0;MQBZ=-1.48859;MQSBZ=0.966092;RPBZ=-0.439155;SCBZ=1.29112;SGB=-0.693079;VDB=0.590453;SNP;TS	1/1:255,87,0:29:0:0,15:0,14:0,29	1/1:255,42,0:14:0:0,6:0,8:0,14	1/1:255,48,0:16:0:0,8:0,8:0,16	1/1:255,48,0:16:0:0,10:0,6:0,16	1/1:255,90,0:30:0:0,17:0,13:0,30	0/1:190,0,115:.:.:.:.:.	0/1:255,0,219:.:.:.:.:.	0/1:255,0,109:.:.:.:.:.	0/1:255,0,134:.:.:.:.:.	0/1:255,0,74:.:.:.:.:.	14	30	34	28	37	30	16	16	19	32	CACTIG010000011.1	9006303	9033423	NC_048345.1|9961563|9988752|-1|XM_034053817.2|XP_033909708.1|cell_division_cycle_42,_transcript_variant_X1|27190	0
CACTIG010000011.1	9012552	.	T	G	215.417	SNP	AC=20;AD=7,23;ADF=4,22;ADR=3,1;AN=30;BQBZ=0.717833;DP=344;DP4=58,21,243,20;FS=0;MQ=23;MQ0F=0;MQBZ=-4.98403;MQSBZ=-1.14239;RPBZ=0.235106;SCBZ=-1.5;SGB=-0.689466;VDB=0.439691;SNP;TV	1/1:136,48,0:16:0:0,16:0,0:0,16	1/1:147,51,0:17:0:0,17:0,0:0,17	1/1:168,48,0:16:0:0,15:0,1:0,16	1/1:245,63,0:21:0:0,15:0,6:0,21	1/1:171,48,0:16:0:0,15:0,1:0,16	0/1:131,0,255:.:.:.:.:.	0/1:122,0,121:.:.:.:.:.	0/1:90,0,90:.:.:.:.:.	0/1:128,0,30:.:.:.:.:.	0/1:143,0,68:.:.:.:.:.	32	22	16	19	30	16	17	16	21	16	CACTIG010000011.1	9006303	9033423	NC_048345.1|9961563|9988752|-1|XM_034053817.2|XP_033909708.1|cell_division_cycle_42,_transcript_variant_X1|27190	0
CACTIG010000011.1	9012872	.	A	G	225.417	SNP	AC=20;AD=6,46;ADF=3,20;ADR=3,26;AN=30;BQBZ=-0.0452507;DP=676;DP4=24,46,218,337;FS=0;MQ=47;MQ0F=0;MQBZ=-2.51496;MQSBZ=-2.25165;RPBZ=-0.0218905;SCBZ=0.860233;SGB=-0.693145;VDB=0.870934;SNP;TS	1/1:255,123,0:41:0:0,16:0,25:0,41	1/1:255,102,0:34:0:0,15:0,19:0,34	1/1:255,84,0:28:0:0,10:0,18:0,28	1/1:255,102,0:34:0:0,10:0,24:0,34	1/1:255,144,0:48:0:0,13:0,35:0,48	0/1:255,0,82:.:.:.:.:.	0/1:255,0,106:.:.:.:.:.	0/1:255,0,136:.:.:.:.:.	0/1:255,0,60:.:.:.:.:.	0/1:255,0,34:.:.:.:.:.	39	44	52	59	62	49	36	34	38	52	CACTIG010000011.1	9006303	9033423	NC_048345.1|9961563|9988752|-1|XM_034053817.2|XP_033909708.1|cell_division_cycle_42,_transcript_variant_X1|27190	0
CACTIG010000011.1	9013307	.	C	T	225.417	SNP	AC=20;AD=6,17;ADF=3,4;ADR=3,13;AN=30;BQBZ=1.69053;DP=427;DP4=64,46,93,203;FS=0;MQ=35;MQ0F=0;MQBZ=-4.72206;MQSBZ=0.853595;RPBZ=1.28033;SCBZ=1.45644;SGB=-0.692562;VDB=0.436706;SNP;TS	1/1:255,66,0:22:0:0,6:0,16:0,22	1/1:203,27,0:9:0:0,6:0,3:0,9	1/1:255,45,0:15:0:0,5:0,10:0,15	1/1:255,99,0:33:0:0,15:0,18:0,33	1/1:255,78,0:26:0:0,11:0,15:0,26	0/1:183,0,253:.:.:.:.:.	0/1:188,0,196:.:.:.:.:.	0/1:217,0,185:.:.:.:.:.	0/1:215,0,212:.:.:.:.:.	0/1:224,0,95:.:.:.:.:.	33	27	36	34	29	28	14	21	45	30	CACTIG010000011.1	9006303	9033423	NC_048345.1|9961563|9988752|-1|XM_034053817.2|XP_033909708.1|cell_division_cycle_42,_transcript_variant_X1|27190	0
CACTIG010000011.1	9015475	.	G	C	225.417	SNP	AC=16;AD=6,19;ADF=4,10;ADR=2,9;AN=22;BQBZ=1.76505;DP=218;DP4=24,17,98,68;FS=0;MQ=27;MQ0F=0;MQBZ=1.06399;MQSBZ=1.45954;RPBZ=0.522233;SCBZ=0.333333;SGB=-0.689466;VDB=0.874116;SNP;TV	1/1:239,48,0:16:0:0,8:0,8:0,16	1/1:251,51,0:17:0:0,9:0,8:0,17	1/1:116,27,0:9:0:0,7:0,2:0,9	1/1:188,19,0:10:0:0,4:1,5:1,9	1/1:255,39,0:13:0:0,6:0,7:0,13	./.:.:.:.:.:.:.	0/1:176,0,180:.:.:.:.:.	0/1:187,0,131:.:.:.:.:.	./.:.:.:.:.:.:.	0/1:255,0,122:.:.:.:.:.	9	24	20	15	27	17	17	11	11	13	CACTIG010000011.1	9006303	9033423	NC_048345.1|9961563|9988752|-1|XM_034053817.2|XP_033909708.1|cell_division_cycle_42,_transcript_variant_X1|27190	0
CACTIG010000011.1	9016547	.	G	T	225.417	SNP	AC=20;AD=12,25;ADF=4,15;ADR=8,10;AN=30;BQBZ=0.650203;DP=419;DP4=32,44,173,133;FS=0;MQ=60;MQ0F=0;MQBZ=-0.666667;MQSBZ=0.790569;RPBZ=-0.772579;SCBZ=0.37693;SGB=-0.693136;VDB=0.274639;SNP;TV	1/1:255,105,0:35:0:0,18:0,17:0,35	1/1:255,99,0:33:0:0,27:0,6:0,33	1/1:255,72,0:24:0:0,16:0,8:0,24	1/1:255,54,0:18:0:0,9:0,9:0,18	1/1:255,48,0:16:0:0,7:0,9:0,16	0/1:200,0,79:.:.:.:.:.	0/1:255,0,55:.:.:.:.:.	0/1:255,0,185:.:.:.:.:.	0/1:255,0,112:.:.:.:.:.	0/1:255,0,218:.:.:.:.:.	16	30	28	30	40	39	35	24	20	22	CACTIG010000011.1	9006303	9033423	NC_048345.1|9961563|9988752|-1|XM_034053817.2|XP_033909708.1|cell_division_cycle_42,_transcript_variant_X1|27190	0
CACTIG010000011.1	9016624	.	GGTCCA	G	228.404	DEL	AC=20;AD=8,14;ADF=4,7;ADR=4,7;AN=30;DP=402;DP4=37,46,101,139;FS=0;IDV=27;IMF=0.818182;MQ=59;MQ0F=0;MQBZ=-0.842141;MQSBZ=-0.941647;RPBZ=-3.78614;SCBZ=-3.33161;SGB=-0.692976;VDB=0.106275;DEL;INDEL;TV	1/1:255,78,0:26:0:0,10:0,16:0,26	1/1:255,90,0:30:0:0,8:0,22:0,30	1/1:255,39,0:17:0:1,8:0,8:1,16	1/1:255,30,0:10:0:0,4:0,6:0,10	1/1:255,54,0:18:0:0,11:0,7:0,18	0/1:210,0,255:.:.:.:.:.	0/1:255,0,89:.:.:.:.:.	0/1:255,0,145:.:.:.:.:.	0/1:255,0,68:.:.:.:.:.	0/1:255,0,133:.:.:.:.:.	20	25	26	36	32	34	40	19	17	22	CACTIG010000011.1	9006303	9033423	NC_048345.1|9961563|9988752|-1|XM_034053817.2|XP_033909708.1|cell_division_cycle_42,_transcript_variant_X1|27190	0
CACTIG010000011.1	9016633	.	C	G	225.417	SNP	AC=20;AD=7,18;ADF=4,9;ADR=3,9;AN=30;BQBZ=-2.94712;DP=353;DP4=28,34,110,170;FS=0;MQ=59;MQ0F=0;MQBZ=-1.16086;MQSBZ=-0.96148;RPBZ=-0.679952;SCBZ=0.559017;SGB=-0.692976;VDB=0.0473263;SNP;TV	1/1:255,78,0:26:0:0,8:0,18:0,26	1/1:255,93,0:31:0:0,7:0,24:0,31	1/1:222,42,0:14:0:0,6:0,8:0,14	1/1:225,42,0:14:0:0,7:0,7:0,14	1/1:255,63,0:21:0:0,10:0,11:0,21	0/1:136,0,170:.:.:.:.:.	0/1:218,0,94:.:.:.:.:.	0/1:243,0,87:.:.:.:.:.	0/1:218,0,111:.:.:.:.:.	0/1:240,0,134:.:.:.:.:.	20	22	26	31	25	30	34	15	14	22	CACTIG010000011.1	9006303	9033423	NC_048345.1|9961563|9988752|-1|XM_034053817.2|XP_033909708.1|cell_division_cycle_42,_transcript_variant_X1|27190	0
CACTIG010000011.1	9016867	.	t	tC	225.417	INS	AC=20;AD=7,19;ADF=3,8;ADR=4,11;AN=30;BQBZ=-0.348743;DP=464;DP4=45,55,156,149;FS=0;IDV=24;IMF=0.827586;MQ=59;MQ0F=0;MQBZ=4.6135;MQSBZ=1.3258;RPBZ=-3.40805;SCBZ=-4.81614;SGB=-0.692717;VDB=0.678014;INDEL;INS;TV	1/1:255,69,0:23:0:0,14:0,9:0,23	1/1:255,69,0:23:0:0,14:0,9:0,23	1/1:255,45,0:15:0:0,8:0,7:0,15	1/1:214,31,0:17:0:0,11:1,5:1,16	1/1:241,39,0:17:0:1,9:0,7:1,16	0/1:172,0,26:.:.:.:.:.	0/1:255,0,64:.:.:.:.:.	0/1:154,0,62:.:.:.:.:.	0/1:242,0,57:.:.:.:.:.	0/1:229,0,16:.:.:.:.:.	42	46	32	39	36	32	31	18	22	19	CACTIG010000011.1	9006303	9033423	NC_048345.1|9961563|9988752|-1|XM_034053817.2|XP_033909708.1|cell_division_cycle_42,_transcript_variant_X1|27190	0
CACTIG010000011.1	9017079	.	T	C	225.417	SNP	AC=20;AD=12,17;ADF=6,10;ADR=6,7;AN=30;BQBZ=-0.0698553;DP=545;DP4=54,60,178,215;FS=0;MQ=58;MQ0F=0;MQBZ=-0.589768;MQSBZ=-1.21395;RPBZ=1.28779;SCBZ=0.589768;SGB=-0.693147;VDB=0.730645;SNP;TS	1/1:255,141,0:47:0:0,28:0,19:0,47	1/1:255,99,0:33:0:0,16:0,17:0,33	1/1:255,51,0:17:0:0,5:0,12:0,17	1/1:255,84,0:28:0:0,23:0,5:0,28	1/1:255,78,0:26:0:0,12:0,14:0,26	0/1:255,0,119:.:.:.:.:.	0/1:255,0,125:.:.:.:.:.	0/1:255,0,255:.:.:.:.:.	0/1:255,0,106:.:.:.:.:.	0/1:255,0,248:.:.:.:.:.	34	43	53	35	31	50	36	19	29	28	CACTIG010000011.1	9006303	9033423	NC_048345.1|9961563|9988752|-1|XM_034053817.2|XP_033909708.1|cell_division_cycle_42,_transcript_variant_X1|27190	0
CACTIG010000011.1	9017149	.	T	G	225.417	SNP	AC=20;AD=4,14;ADF=1,8;ADR=3,6;AN=30;BQBZ=0.64324;DP=486;DP4=28,44,180,210;FS=0;MQ=60;MQ0F=0;RPBZ=-0.664406;SCBZ=0.4;SGB=-0.693146;VDB=0.324101;SNP;TV	1/1:255,129,0:43:0:0,18:0,25:0,43	1/1:255,117,0:39:0:0,17:0,22:0,39	1/1:255,45,0:15:0:0,8:0,7:0,15	1/1:255,87,0:29:0:0,15:0,14:0,29	1/1:255,90,0:30:0:0,14:0,16:0,30	0/1:255,0,48:.:.:.:.:.	0/1:255,0,47:.:.:.:.:.	0/1:255,0,195:.:.:.:.:.	0/1:255,0,176:.:.:.:.:.	0/1:255,0,81:.:.:.:.:.	33	32	42	38	20	46	42	16	33	31	CACTIG010000011.1	9006303	9033423	NC_048345.1|9961563|9988752|-1|XM_034053817.2|XP_033909708.1|cell_division_cycle_42,_transcript_variant_X1|27190	0
CACTIG010000011.1	9017345	.	C	A	225.417	SNP	AC=20;AD=7,29;ADF=6,11;ADR=1,18;AN=30;BQBZ=-0.771251;DP=633;DP4=42,48,266,241;FS=0;MQ=60;MQ0F=0;RPBZ=2.21581;SCBZ=0.447214;SGB=-0.693097;VDB=0.00517272;SNP;TV	1/1:255,90,0:30:0:0,11:0,19:0,30	1/1:255,132,0:44:0:0,25:0,19:0,44	1/1:255,96,0:32:0:0,17:0,15:0,32	1/1:255,160,0:53:0:0,28:0,25:0,53	1/1:255,108,0:36:0:0,19:0,17:0,36	0/1:255,0,30:.:.:.:.:.	0/1:255,0,198:.:.:.:.:.	0/1:255,0,204:.:.:.:.:.	0/1:255,0,126:.:.:.:.:.	0/1:255,22,105:.:.:.:.:.	43	39	39	53	44	31	48	38	57	41	CACTIG010000011.1	9006303	9033423	NC_048345.1|9961563|9988752|-1|XM_034053817.2|XP_033909708.1|cell_division_cycle_42,_transcript_variant_X1|27190	0
CACTIG010000011.1	9017359	.	C	T	225.417	SNP	AC=20;AD=12,30;ADF=8,13;ADR=4,17;AN=30;BQBZ=-0.753987;DP=645;DP4=48,54,247,254;FS=0;MQ=60;MQ0F=0;RPBZ=0.761209;SCBZ=0.751809;SGB=-0.69312;VDB=0.0552224;SNP;TS	1/1:255,96,0:32:0:0,14:0,18:0,32	1/1:255,129,0:43:0:0,23:0,20:0,43	1/1:255,114,0:38:0:0,18:0,20:0,38	1/1:255,144,0:48:0:0,23:0,25:0,48	1/1:255,114,0:38:0:0,21:0,17:0,38	0/1:255,0,45:.:.:.:.:.	0/1:255,0,195:.:.:.:.:.	0/1:255,0,222:.:.:.:.:.	0/1:255,0,133:.:.:.:.:.	0/1:255,0,206:.:.:.:.:.	45	39	38	51	45	34	51	40	56	42	CACTIG010000011.1	9006303	9033423	NC_048345.1|9961563|9988752|-1|XM_034053817.2|XP_033909708.1|cell_division_cycle_42,_transcript_variant_X1|27190	0
CACTIG010000011.1	9017490	.	T	C	228.376	SNP	AC=20;AD=5,39;ADF=3,25;ADR=2,14;AN=30;BQBZ=1.5932;DP=559;DP4=38,31,257,196;FS=0;MQ=60;MQ0F=0;RPBZ=1.67599;SGB=-0.693127;VDB=0.629151;SNP;TS	1/1:255,99,0:33:0:0,19:0,14:0,33	1/1:255,114,0:38:0:0,20:0,18:0,38	1/1:255,90,0:30:0:0,17:0,13:0,30	1/1:255,87,0:29:0:0,16:0,13:0,29	1/1:255,75,0:30:0:0,11:1,18:1,29	0/1:255,0,56:.:.:.:.:.	0/1:255,0,98:.:.:.:.:.	0/1:255,0,165:.:.:.:.:.	0/1:255,0,96:.:.:.:.:.	0/1:255,0,25:.:.:.:.:.	34	35	36	42	47	36	38	32	33	35	CACTIG010000011.1	9006303	9033423	NC_048345.1|9961563|9988752|-1|XM_034053817.2|XP_033909708.1|cell_division_cycle_42,_transcript_variant_X1|27190	0
CACTIG010000011.1	9017524	.	C	G	228.296	SNP	AC=20;AD=15,38;ADF=10,26;ADR=5,12;AN=30;BQBZ=-0.107484;DP=613;DP4=57,44,281,214;FS=0;MQ=60;MQ0F=0;RPBZ=-1.63224;SCBZ=0.82646;SGB=-0.693139;VDB=0.279098;SNP;TV	1/1:255,108,0:36:0:0,19:0,17:0,36	1/1:255,65,0:34:0:1,15:0,18:1,33	1/1:255,117,0:39:0:0,21:0,18:0,39	1/1:255,129,0:43:0:0,22:0,21:0,43	1/1:255,96,0:32:0:0,14:0,18:0,32	0/1:255,0,92:.:.:.:.:.	0/1:255,0,97:.:.:.:.:.	0/1:255,0,228:.:.:.:.:.	0/1:255,0,135:.:.:.:.:.	0/1:255,0,202:.:.:.:.:.	36	33	43	47	54	36	34	41	46	36	CACTIG010000011.1	9006303	9033423	NC_048345.1|9961563|9988752|-1|XM_034053817.2|XP_033909708.1|cell_division_cycle_42,_transcript_variant_X1|27190	0
CACTIG010000011.1	9017686	.	A	G	225.417	SNP	AC=20;AD=19,38;ADF=8,13;ADR=11,25;AN=30;BQBZ=-1.89783;DP=698;DP4=42,70,259,306;FS=0;MQ=60;MQ0F=0;RPBZ=0.610241;SCBZ=0.46291;SGB=-0.693144;VDB=0.165524;SNP;TS	1/1:255,117,0:39:0:0,17:0,22:0,39	1/1:255,120,0:40:0:0,18:0,22:0,40	1/1:255,123,0:41:0:0,19:0,22:0,41	1/1:255,129,0:43:0:0,19:0,24:0,43	1/1:255,102,0:34:0:0,16:0,18:0,34	0/1:255,0,93:.:.:.:.:.	0/1:255,0,116:.:.:.:.:.	0/1:255,0,193:.:.:.:.:.	0/1:255,0,47:.:.:.:.:.	0/1:255,0,255:.:.:.:.:.	36	39	63	48	60	44	44	41	49	36	CACTIG010000011.1	9006303	9033423	NC_048345.1|9961563|9988752|-1|XM_034053817.2|XP_033909708.1|cell_division_cycle_42,_transcript_variant_X1|27190	0
CACTIG010000011.1	9018023	.	C	CGT	228.397	INS	AC=20;AD=13,22;ADF=7,15;ADR=6,7;AN=30;BQBZ=-1.7506;DP=446;DP4=56,43,167,132;FS=0;IDV=26;IMF=0.83871;MQ=55;MQ0F=0;MQBZ=0.650138;MQSBZ=1.1723;RPBZ=-2.0959;SCBZ=-1.36317;SGB=-0.692976;VDB=0.317148;INDEL;INS;TV	1/1:255,67,0:27:0:1,11:0,15:1,26	1/1:255,10,0:24:0:2,11:1,10:3,21	1/1:255,33,0:11:0:0,4:0,7:0,11	1/1:255,59,0:32:6:3,15:0,14:3,29	1/1:255,78,0:26:0:0,12:0,14:0,26	0/1:255,0,32:.:.:.:.:.	0/1:255,0,127:.:.:.:.:.	0/1:239,0,187:.:.:.:.:.	0/1:255,0,34:.:.:.:.:.	0/1:255,0,117:.:.:.:.:.	28	20	32	38	41	31	32	16	39	30	CACTIG010000011.1	9006303	9033423	NC_048345.1|9961563|9988752|-1|XM_034053817.2|XP_033909708.1|cell_division_cycle_42,_transcript_variant_X1|27190	0
CACTIG010000011.1	9018704	.	T	C	225.417	SNP	AC=20;AD=8,30;ADF=4,11;ADR=4,19;AN=30;BQBZ=0.586133;DP=525;DP4=46,52,215,199;FS=0;MQ=48;MQ0F=0;MQBZ=-1.50827;MQSBZ=-0.439488;RPBZ=-0.106655;SCBZ=0.550482;SGB=-0.693021;VDB=0.891387;SNP;TS	1/1:255,81,0:27:0:0,16:0,11:0,27	1/1:255,102,0:34:0:0,20:0,14:0,34	1/1:255,69,0:23:0:0,14:0,9:0,23	1/1:255,129,0:43:0:0,25:0,18:0,43	1/1:255,66,0:22:0:0,10:0,12:0,22	0/1:255,0,56:.:.:.:.:.	0/1:255,0,120:.:.:.:.:.	0/1:255,0,255:.:.:.:.:.	0/1:255,0,154:.:.:.:.:.	0/1:255,0,101:.:.:.:.:.	29	32	44	44	41	29	35	23	46	23	CACTIG010000011.1	9006303	9033423	NC_048345.1|9961563|9988752|-1|XM_034053817.2|XP_033909708.1|cell_division_cycle_42,_transcript_variant_X1|27190	0
CACTIG010000011.1	9019361	.	T	G	188.416	SNP	AC=14;AD=18,8;ADF=11,7;ADR=7,1;AN=18;BQBZ=0.653534;DP=108;DP4=32,20,41,15;FS=0;MQ=18;MQ0F=0;MQBZ=-3.53328;MQSBZ=-0.447214;RPBZ=-1.73746;SGB=-0.556411;VDB=0.230191;SNP;TV	1/1:64,12,0:4:0:0,3:0,1:0,4	1/1:135,18,0:6:0:0,5:0,1:0,6	1/1:76,12,0:4:0:0,4:0,0:0,4	1/1:153,15,0:5:0:0,2:0,3:0,5	1/1:218,27,0:9:0:0,3:0,6:0,9	./.:.:.:.:.:.:.	0/1:92,0,184:.:.:.:.:.	./.:.:.:.:.:.:.	./.:.:.:.:.:.:.	0/1:124,0,255:.:.:.:.:.	9	13	19	6	26	4	6	4	5	9	CACTIG010000011.1	9006303	9033423	NC_048345.1|9961563|9988752|-1|XM_034053817.2|XP_033909708.1|cell_division_cycle_42,_transcript_variant_X1|27190	0
CACTIG010000011.1	9019489	.	A	G	225.417	SNP	AC=20;AD=18,21;ADF=8,12;ADR=10,9;AN=30;BQBZ=-0.182803;DP=312;DP4=52,66,122,62;FS=0;MQ=42;MQ0F=0;MQBZ=-1.13389;MQSBZ=-0.529966;RPBZ=-2.11858;SCBZ=0.666667;SGB=-0.686358;VDB=0.124446;SNP;TS	1/1:255,42,0:14:0:0,8:0,6:0,14	1/1:255,48,0:16:0:0,8:0,8:0,16	1/1:251,36,0:12:0:0,5:0,7:0,12	1/1:237,36,0:12:0:0,9:0,3:0,12	1/1:226,27,0:9:0:0,6:0,3:0,9	0/1:122,0,199:.:.:.:.:.	0/1:243,0,161:.:.:.:.:.	0/1:128,0,255:.:.:.:.:.	0/1:90,0,96:.:.:.:.:.	0/1:255,0,255:.:.:.:.:.	21	29	33	15	41	18	20	20	17	9	CACTIG010000011.1	9006303	9033423	NC_048345.1|9961563|9988752|-1|XM_034053817.2|XP_033909708.1|cell_division_cycle_42,_transcript_variant_X1|27190	0
CACTIG010000011.1	9019532	.	T	C	225.417	SNP	AC=20;AD=20,25;ADF=10,13;ADR=10,12;AN=30;BQBZ=-0.763664;DP=342;DP4=56,60,152,70;FS=0;MQ=44;MQ0F=0;MQBZ=-1.85222;MQSBZ=-0.382787;RPBZ=0.743477;SCBZ=1.23909;SGB=-0.690438;VDB=0.0141207;SNP;TS	1/1:255,51,0:17:0:0,12:0,5:0,17	1/1:255,48,0:16:0:0,7:0,9:0,16	1/1:252,39,0:13:0:0,6:0,7:0,13	1/1:255,45,0:15:0:0,12:0,3:0,15	1/1:255,57,0:19:0:0,15:0,4:0,19	0/1:147,0,174:.:.:.:.:.	0/1:252,0,137:.:.:.:.:.	0/1:140,0,255:.:.:.:.:.	0/1:96,0,118:.:.:.:.:.	0/1:255,0,255:.:.:.:.:.	22	30	30	17	46	19	19	19	19	21	CACTIG010000011.1	9006303	9033423	NC_048345.1|9961563|9988752|-1|XM_034053817.2|XP_033909708.1|cell_division_cycle_42,_transcript_variant_X1|27190	0
CACTIG010000011.1	9019555	.	A	G	225.417	SNP	AC=20;AD=18,22;ADF=10,12;ADR=8,10;AN=30;BQBZ=-1.27724;DP=308;DP4=48,46,128,62;FS=0;MQ=47;MQ0F=0;MQBZ=-2.44323;MQSBZ=-0.243376;RPBZ=0.286108;SCBZ=0.92582;SGB=-0.686358;VDB=0.0506985;SNP;TS	1/1:253,42,0:14:0:0,11:0,3:0,14	1/1:255,39,0:13:0:0,9:0,4:0,13	1/1:218,30,0:10:0:0,5:0,5:0,10	1/1:255,39,0:13:0:0,8:0,5:0,13	1/1:255,51,0:17:0:0,12:0,5:0,17	0/1:114,0,142:.:.:.:.:.	0/1:255,0,88:.:.:.:.:.	0/1:110,0,249:.:.:.:.:.	0/1:72,0,88:.:.:.:.:.	0/1:255,0,255:.:.:.:.:.	16	32	23	14	40	16	17	14	16	21	CACTIG010000011.1	9006303	9033423	NC_048345.1|9961563|9988752|-1|XM_034053817.2|XP_033909708.1|cell_division_cycle_42,_transcript_variant_X1|27190	0
CACTIG010000011.1	9019761	.	A	C	228.395	SNP	AC=20;AD=25,26;ADF=16,14;ADR=9,12;AN=30;BQBZ=1.68916;DP=482;DP4=61,48,232,128;FS=0;MQ=55;MQ0F=0;MQBZ=-0.406816;MQSBZ=-0.992039;RPBZ=-1.32331;SCBZ=0.223607;SGB=-0.692067;VDB=0.0103123;SNP;TV	1/1:255,50,0:21:0:1,11:0,9:1,20	1/1:255,87,0:30:0:0,20:0,9:0,29	1/1:239,42,0:14:0:0,11:0,3:0,14	1/1:255,84,0:28:0:0,22:0,6:0,28	1/1:255,105,0:35:0:0,20:0,15:0,35	0/1:255,0,108:.:.:.:.:.	0/1:243,0,55:.:.:.:.:.	0/1:255,0,214:.:.:.:.:.	0/1:255,0,77:.:.:.:.:.	0/1:255,0,255:.:.:.:.:.	39	25	45	31	54	28	34	18	41	43	CACTIG010000011.1	9006303	9033423	NC_048345.1|9961563|9988752|-1|XM_034053817.2|XP_033909708.1|cell_division_cycle_42,_transcript_variant_X1|27190	0
CACTIG010000011.1	9021273	.	T	A	225.417	SNP	AC=20;AD=22,25;ADF=16,11;ADR=6,14;AN=30;BQBZ=0.22366;DP=588;DP4=60,60,252,212;FS=0;MQ=33;MQ0F=0;MQBZ=-3.88942;MQSBZ=0.696521;RPBZ=0.369209;SCBZ=-4.59529;SGB=-0.693132;VDB=0.573373;SNP;TV	1/1:255,102,0:34:0:0,23:0,11:0,34	1/1:255,120,0:40:0:0,25:0,15:0,40	1/1:255,75,0:25:0:0,15:0,10:0,25	1/1:255,129,0:43:0:0,28:0,15:0,43	1/1:255,141,0:47:0:0,23:0,24:0,47	0/1:255,0,58:.:.:.:.:.	0/1:255,0,134:.:.:.:.:.	0/1:255,0,235:.:.:.:.:.	0/1:255,0,55:.:.:.:.:.	0/1:255,0,255:.:.:.:.:.	41	37	42	36	48	34	41	25	43	49	CACTIG010000011.1	9006303	9033423	NC_048345.1|9961563|9988752|-1|XM_034053817.2|XP_033909708.1|cell_division_cycle_42,_transcript_variant_X1|27190	0
CACTIG010000011.1	9021559	.	A	AT	228.417	INS	AC=20;AD=21,29;ADF=12,14;ADR=9,15;AN=30;BQBZ=-1.77148;DP=694;DP4=92,67,262,235;FS=0;IDV=24;IMF=0.857143;MQ=53;MQ0F=0;MQBZ=1.2746;MQSBZ=0.938838;RPBZ=-0.328491;SCBZ=-2.8129;SGB=-0.692831;VDB=0.412813;INDEL;INS;TV	1/1:255,53,0:26:3:1,6:1,18:2,24	1/1:255,94,0:43:7:2,18:0,23:2,41	1/1:255,85,0:40:7:2,17:0,21:2,38	1/1:255,134,0:50:0:0,29:1,20:1,49	1/1:255,86,0:38:0:1,21:1,15:2,36	0/1:255,0,51:.:.:.:.:.	0/1:255,0,28:.:.:.:.:.	0/1:255,0,150:.:.:.:.:.	0/1:255,0,56:.:.:.:.:.	0/1:255,0,129:.:.:.:.:.	45	54	45	47	53	29	49	46	50	39	CACTIG010000011.1	9006303	9033423	NC_048345.1|9961563|9988752|-1|XM_034053817.2|XP_033909708.1|cell_division_cycle_42,_transcript_variant_X1|27190	0
CACTIG010000011.1	9021600	.	C	G	225.417	SNP	AC=20;AD=22,31;ADF=11,13;ADR=11,18;AN=30;BQBZ=0.289683;DP=684;DP4=74,62,247,286;FS=0;MQ=55;MQ0F=0;MQBZ=-1.66538;MQSBZ=0.805798;RPBZ=-0.304413;SCBZ=0.5;SGB=-0.693079;VDB=0.751975;SNP;TV	1/1:255,87,0:29:0:0,8:0,21:0,29	1/1:255,138,0:46:0:0,26:0,20:0,46	1/1:255,99,0:33:0:0,8:0,25:0,33	1/1:255,163,0:54:0:0,29:0,25:0,54	1/1:255,108,0:36:0:0,23:0,13:0,36	0/1:255,0,122:.:.:.:.:.	0/1:255,0,131:.:.:.:.:.	0/1:255,0,255:.:.:.:.:.	0/1:255,0,133:.:.:.:.:.	0/1:255,0,255:.:.:.:.:.	44	56	50	42	53	29	47	34	55	37	CACTIG010000011.1	9006303	9033423	NC_048345.1|9961563|9988752|-1|XM_034053817.2|XP_033909708.1|cell_division_cycle_42,_transcript_variant_X1|27190	0
CACTIG010000011.1	9021716	.	A	G	225.417	SNP	AC=20;AD=24,16;ADF=11,7;ADR=13,9;AN=30;BQBZ=-0.293976;DP=565;DP4=56,74,180,242;FS=0;MQ=37;MQ0F=0;MQBZ=-2.97976;MQSBZ=1.12014;RPBZ=1.62174;SCBZ=0.433013;SGB=-0.692562;VDB=0.852415;SNP;TS	1/1:255,66,0:22:0:0,16:0,6:0,22	1/1:255,117,0:39:0:0,15:0,24:0,39	1/1:255,93,0:31:0:0,16:0,15:0,31	1/1:255,123,0:41:0:0,13:0,28:0,41	1/1:255,141,0:47:0:0,21:0,26:0,47	0/1:255,0,74:.:.:.:.:.	0/1:255,0,54:.:.:.:.:.	0/1:203,0,255:.:.:.:.:.	0/1:247,0,163:.:.:.:.:.	0/1:178,0,255:.:.:.:.:.	40	35	37	42	40	22	39	32	41	47	CACTIG010000011.1	9006303	9033423	NC_048345.1|9961563|9988752|-1|XM_034053817.2|XP_033909708.1|cell_division_cycle_42,_transcript_variant_X1|27190	0
CACTIG010000011.1	9021755	.	A	T	225.417	SNP	AC=20;AD=21,26;ADF=10,15;ADR=11,11;AN=30;BQBZ=-0.55706;DP=514;DP4=54,70,188,186;FS=0;MQ=39;MQ0F=0;MQBZ=-4.23306;MQSBZ=0.538332;RPBZ=1.18624;SCBZ=0.4;SGB=-0.692067;VDB=0.853867;SNP;TV	1/1:255,60,0:20:0:0,11:0,9:0,20	1/1:255,117,0:39:0:0,13:0,26:0,39	1/1:255,72,0:24:0:0,12:0,12:0,24	1/1:255,111,0:37:0:0,16:0,21:0,37	1/1:255,117,0:39:0:0,24:0,15:0,39	0/1:255,0,138:.:.:.:.:.	0/1:255,0,26:.:.:.:.:.	0/1:194,0,255:.:.:.:.:.	0/1:199,0,168:.:.:.:.:.	0/1:255,0,255:.:.:.:.:.	39	29	30	28	50	22	42	26	37	41	CACTIG010000011.1	9006303	9033423	NC_048345.1|9961563|9988752|-1|XM_034053817.2|XP_033909708.1|cell_division_cycle_42,_transcript_variant_X1|27190	0
CACTIG010000011.1	9023155	.	T	C	228.274	SNP	AC=20;AD=14,20;ADF=10,9;ADR=4,11;AN=30;BQBZ=0.349391;DP=417;DP4=50,43,158,156;FS=0;MQ=34;MQ0F=0;MQBZ=-1.89815;MQSBZ=-0.284573;RPBZ=-1.34286;SCBZ=0.326825;SGB=-0.692562;VDB=0.850791;SNP;TS	1/1:255,66,0:22:0:0,8:0,14:0,22	1/1:230,30,0:10:0:0,6:0,4:0,10	1/1:255,72,0:24:0:0,9:0,15:0,24	1/1:255,57,0:31:0:0,17:1,13:1,30	1/1:255,63,0:21:0:0,12:0,9:0,21	0/1:255,0,30:.:.:.:.:.	0/1:255,0,111:.:.:.:.:.	0/1:255,0,219:.:.:.:.:.	0/1:254,0,149:.:.:.:.:.	0/1:255,0,235:.:.:.:.:.	26	25	35	30	35	22	10	26	33	21	CACTIG010000011.1	9006303	9033423	NC_048345.1|9961563|9988752|-1|XM_034053817.2|XP_033909708.1|cell_division_cycle_42,_transcript_variant_X1|27190	0
CACTIG010000011.1	9024032	.	T	A	228.372	SNP	AC=20;AD=19,19;ADF=8,9;ADR=11,10;AN=30;BQBZ=1.83683;DP=466;DP4=54,67,167,152;FS=0;MQ=37;MQ0F=0;MQBZ=1.05062;MQSBZ=-0.249962;RPBZ=-0.416346;SCBZ=-2.94884;SGB=-0.693079;VDB=0.948613;SNP;TV	1/1:255,87,0:29:0:0,11:0,18:0,29	1/1:243,48,0:16:0:0,9:0,7:0,16	1/1:255,84,0:28:0:0,15:0,13:0,28	1/1:255,61,0:25:0:0,18:1,6:1,24	1/1:255,81,0:27:0:0,12:0,15:0,27	0/1:179,0,206:.:.:.:.:.	0/1:232,0,147:.:.:.:.:.	0/1:205,0,255:.:.:.:.:.	0/1:255,0,118:.:.:.:.:.	0/1:218,0,255:.:.:.:.:.	25	30	37	35	38	32	21	29	27	27	CACTIG010000011.1	9006303	9033423	NC_048345.1|9961563|9988752|-1|XM_034053817.2|XP_033909708.1|cell_division_cycle_42,_transcript_variant_X1|27190	0
CACTIG010000011.1	9024498	.	T	C	228.325	SNP	AC=20;AD=18,21;ADF=10,13;ADR=8,8;AN=30;BQBZ=0.592026;DP=587;DP4=62,69,243,196;FS=0;MQ=59;MQ0F=0;MQBZ=-0.2208;MQSBZ=-1.76965;RPBZ=-1.69408;SCBZ=0.475219;SGB=-0.693146;VDB=0.216947;SNP;TS	1/1:255,93,0:43:0:0,26:1,16:1,42	1/1:255,96,0:32:0:0,15:0,17:0,32	1/1:255,81,0:27:0:0,17:0,10:0,27	1/1:255,111,0:37:0:0,17:0,20:0,37	1/1:255,93,0:31:0:0,20:0,11:0,31	0/1:255,0,186:.:.:.:.:.	0/1:255,0,129:.:.:.:.:.	0/1:255,0,255:.:.:.:.:.	0/1:255,0,121:.:.:.:.:.	0/1:255,0,255:.:.:.:.:.	32	50	52	66	41	46	41	30	42	40	CACTIG010000011.1	9006303	9033423	NC_048345.1|9961563|9988752|-1|XM_034053817.2|XP_033909708.1|cell_division_cycle_42,_transcript_variant_X1|27190	0
CACTIG010000011.1	9027767	.	A	G	208.323	SNP	AC=18;AD=6,3;ADF=4,2;ADR=2,1;AN=26;BQBZ=-0.523937;DP=129;DP4=39,13,25,46;FS=0;MQ=30;MQ0F=0;MQBZ=1.00905;MQSBZ=1.26131;RPBZ=1.51357;SCBZ=-2.44949;SGB=-0.511536;VDB=0.779245;SNP;TS	1/1:70,9,0:3:0:0,0:0,3:0,3	1/1:142,5,0:7:0:1,5:0,1:1,6	1/1:145,4,0:7:0:1,1:0,5:1,6	1/1:127,0,0:8:0:0,1:1,6:1,7	1/1:235,30,0:14:0:1,8:0,5:1,13	0/1:60,0,103:.:.:.:.:.	0/1:80,0,213:.:.:.:.:.	0/1:78,0,63:.:.:.:.:.	./.:.:.:.:.:.:.	0/1:54,0,98:.:.:.:.:.	9	16	7	2	10	3	8	7	8	15	CACTIG010000011.1	9006303	9033423	NC_048345.1|9961563|9988752|-1|XM_034053817.2|XP_033909708.1|cell_division_cycle_42,_transcript_variant_X1|27190	0
CACTIG010000011.1	10776682	.	A	G	228.151	SNP	AC=20;AD=7,11;ADF=2,6;ADR=5,5;AN=30;BQBZ=0.675703;DP=356;DP4=24,63,103,149;FS=0;MQ=55;MQ0F=0;MQBZ=1.11803;MQSBZ=1.82421;RPBZ=-0.261911;SCBZ=-0.963794;SGB=-0.691153;VDB=0.702467;SNP;TS	1/1:255,51,0:18:0:0,6:0,11:0,17	1/1:158,0,0:10:3:0,3:2,4:2,7	1/1:255,33,0:11:0:0,5:0,6:0,11	1/1:255,81,0:27:0:0,11:0,16:0,27	1/1:255,20,0:24:8:0,14:2,8:2,22	0/1:200,0,61:.:.:.:.:.	0/1:250,0,7:.:.:.:.:.	0/1:255,0,94:.:.:.:.:.	0/1:255,0,20:.:.:.:.:.	0/1:168,0,65:.:.:.:.:.	35	20	45	33	27	22	15	14	30	29	CACTIG010000011.1	10812427	10830684	NC_048345.1|26834378|26852596|1|XM_034054152.2|XP_033910043.1|C-type_lectin_domain_family_7_member_A-like|18219	35745
CACTIG010000011.1	16192479	.	T	A	225.417	SNP	AC=20;AD=7,15;ADF=3,12;ADR=4,3;AN=30;BQBZ=-0.750086;DP=277;DP4=28,22,153,60;FS=0;MQ=60;MQ0F=0;RPBZ=-0.389678;SGB=-0.691153;VDB=0.262615;SNP;TV	1/1:229,54,0:18:0:0,17:0,1:0,18	1/1:255,54,0:18:0:0,12:0,6:0,18	1/1:255,39,0:13:0:0,8:0,5:0,13	1/1:255,45,0:15:0:0,9:0,6:0,15	1/1:255,45,0:15:0:0,9:0,6:0,15	0/1:216,0,64:.:.:.:.:.	0/1:246,0,63:.:.:.:.:.	0/1:239,0,87:.:.:.:.:.	0/1:182,0,148:.:.:.:.:.	0/1:234,0,141:.:.:.:.:.	19	32	26	33	31	28	26	16	22	19	CACTIG010000011.1	16137245	16473919	NC_048345.1|21036666|21371737|-1|XM_034053396.2|XP_033909287.2|potassium_voltage-gated_channel_subfamily_KQT_member_1-like,_transcript_variant_X1|335072	0
CACTIG010000011.1	16196126	.	C	T,A	225.417	SNP	AC=20,8;AD=0,17,8;ADF=0,10,6;ADR=0,7,2;AN=30;BQBZ=0.090455;DP=445;DP4=10,12,200,205;FS=0;MQ=58;MQ0F=0;MQBZ=-1.33012;MQSBZ=0.13817;RPBZ=-0.928601;SGB=-0.692352;VDB=0.543727;SNP;TS;TV	1/1:255,63,0,.,.,.:21:0:0,10,.:0,11,.:0,21,.	1/1:255,69,0,.,.,.:23:0:0,14,.:0,9,.:0,23,.	1/1:255,60,0,.,.,.:20:0:0,8,.:0,12,.:0,20,.	1/1:255,81,0,.,.,.:27:0:0,14,.:0,13,.:0,27,.	1/1:255,60,0,.,.,.:20:0:0,8,.:0,12,.:0,20,.	0/1:247,0,236,.,.,.:.:.:.:.:.	1/2:255,190,112,255,0,255:.:.:.:.:.	1/2:255,161,77,255,0,255:.:.:.:.:.	1/2:255,255,221,255,0,255:.:.:.:.:.	1/2:255,183,132,255,0,255:.:.:.:.:.	26	34	36	44	25	26	24	26	28	22	CACTIG010000011.1	16137245	16473919	NC_048345.1|21036666|21371737|-1|XM_034053396.2|XP_033909287.2|potassium_voltage-gated_channel_subfamily_KQT_member_1-like,_transcript_variant_X1|335072	0
CACTIG010000011.1	18134806	.	C	T	228.225	SNP	AC=20;AD=17,16;ADF=6,7;ADR=11,9;AN=30;BQBZ=0.545455;DP=425;DP4=65,60,148,144;FS=0;MQ=54;MQ0F=0;MQBZ=1.86042;MQSBZ=-1.37267;RPBZ=0.260231;SCBZ=-2.65274;SGB=-0.69168;VDB=0.226845;SNP;TS	1/1:255,27,0:20:0:1,8:0,11:1,19	1/1:255,87,0:29:0:0,14:0,15:0,29	1/1:255,39,0:13:0:0,8:0,5:0,13	1/1:255,35,0:28:8:2,10:0,16:2,26	1/1:255,81,0:27:0:0,12:0,15:0,27	0/1:255,0,77:.:.:.:.:.	0/1:255,0,143:.:.:.:.:.	0/1:243,0,255:.:.:.:.:.	0/1:255,0,208:.:.:.:.:.	0/1:255,0,255:.:.:.:.:.	17	36	33	32	35	20	32	14	33	31	CACTIG010000011.1	18032897	18170051	NC_048345.1|19580747|19729183|1|XM_034904798.1|XP_034760689.1|N-acetyl-beta-glucosaminyl-glycoprotein_4-beta-N-acetylgalactosaminyltransferase_1-like|148437	0
CACTIG010000011.1	18138130	.	G	A	228.409	SNP	AC=20;AD=19,22;ADF=17,12;ADR=2,10;AN=30;BQBZ=0.789754;DP=569;DP4=100,31,240,175;FS=0;MQ=57;MQ0F=0;MQBZ=4.89898;MQSBZ=0.62361;RPBZ=-0.693642;SCBZ=0.204124;SGB=-0.692831;VDB=0.955557;SNP;TS	1/1:255,61,0:25:0:1,17:0,7:1,24	1/1:255,0,0:41:2:4,21:1,15:5,36	1/1:255,69,0:38:0:1,19:0,18:1,37	1/1:255,117,0:61:9:3,27:0,31:3,58	1/1:255,62,0:33:0:1,20:0,12:1,32	0/1:255,0,222:.:.:.:.:.	0/1:255,0,104:.:.:.:.:.	0/1:255,0,82:.:.:.:.:.	0/1:255,0,176:.:.:.:.:.	0/1:255,0,198:.:.:.:.:.	29	42	31	43	47	26	45	41	61	35	CACTIG010000011.1	18032897	18170051	NC_048345.1|19580747|19729183|1|XM_034904798.1|XP_034760689.1|N-acetyl-beta-glucosaminyl-glycoprotein_4-beta-N-acetylgalactosaminyltransferase_1-like|148437	0
CACTIG010000011.1	18138141	.	C	A	228.408	SNP	AC=20;AD=19,20;ADF=18,12;ADR=1,8;AN=30;BQBZ=-1.02579;DP=551;DP4=98,32,233,168;FS=0;MQ=57;MQ0F=0;MQBZ=4.69042;MQSBZ=0.801784;RPBZ=-1.50868;SCBZ=-2.91548;SGB=-0.692562;VDB=0.0660656;SNP;TV	1/1:255,55,0:23:0:1,13:0,9:1,22	1/1:255,0,0:38:2:3,19:1,15:4,34	1/1:255,63,0:33:0:0,15:1,17:1,32	1/1:255,81,0:54:6:3,24:0,27:3,51	1/1:255,69,0:35:0:1,22:0,12:1,34	0/1:255,0,188:.:.:.:.:.	0/1:255,0,125:.:.:.:.:.	0/1:255,0,80:.:.:.:.:.	0/1:255,0,227:.:.:.:.:.	0/1:255,0,174:.:.:.:.:.	30	42	36	41	45	23	41	34	55	36	CACTIG010000011.1	18032897	18170051	NC_048345.1|19580747|19729183|1|XM_034904798.1|XP_034760689.1|N-acetyl-beta-glucosaminyl-glycoprotein_4-beta-N-acetylgalactosaminyltransferase_1-like|148437	0
CACTIG010000011.1	18138178	.	G	A	228.332	SNP	AC=20;AD=22,18;ADF=15,9;ADR=7,9;AN=30;BQBZ=0.594098;DP=612;DP4=95,62,236,185;FS=0;MQ=58;MQ0F=0;MQBZ=3.67423;MQSBZ=-1.19024;RPBZ=1.07636;SCBZ=-2.04082;SGB=-0.693021;VDB=0.502284;SNP;TS	1/1:255,60,0:29:0:1,16:1,11:2,27	1/1:255,55,0:46:2:1,22:3,20:4,42	1/1:255,53,0:38:0:1,15:1,20:2,35	1/1:255,89,0:47:3:0,21:2,24:2,45	1/1:255,59,0:32:0:0,17:1,14:1,31	0/1:255,0,171:.:.:.:.:.	0/1:255,0,183:.:.:.:.:.	0/1:255,0,100:.:.:.:.:.	0/1:255,0,255:.:.:.:.:.	0/1:255,0,255:.:.:.:.:.	31	47	40	53	46	30	49	39	49	35	CACTIG010000011.1	18032897	18170051	NC_048345.1|19580747|19729183|1|XM_034904798.1|XP_034760689.1|N-acetyl-beta-glucosaminyl-glycoprotein_4-beta-N-acetylgalactosaminyltransferase_1-like|148437	0
CACTIG010000011.1	18224430	.	T	C	225.417	SNP	AC=20;AD=5,14;ADF=2,7;ADR=3,7;AN=30;BQBZ=-1.60905;DP=233;DP4=24,18,105,61;FS=0;MQ=60;MQ0F=0;RPBZ=-0.670671;SCBZ=-1.34164;SGB=-0.686358;VDB=0.831598;SNP;TS	1/1:255,42,0:14:0:0,9:0,5:0,14	1/1:255,42,0:14:0:0,9:0,5:0,14	1/1:255,42,0:14:0:0,8:0,6:0,14	1/1:255,36,0:12:0:0,8:0,4:0,12	1/1:176,18,0:6:0:0,3:0,3:0,6	0/1:154,0,73:.:.:.:.:.	0/1:181,0,92:.:.:.:.:.	0/1:255,0,74:.:.:.:.:.	0/1:248,0,87:.:.:.:.:.	0/1:255,0,130:.:.:.:.:.	10	16	18	21	24	16	15	14	13	7	CACTIG010000011.1	18213668	18251671	NC_048345.1|19497749|19535997|-1|XM_034053187.2|XP_033909078.2|CD82_antigen-like,_transcript_variant_X2|38249	0
CACTIG010000011.1	18224488	.	C	CATGT	228.409	INS	AC=20;AD=6,12;ADF=0,7;ADR=6,5;AN=30;DP=302;DP4=33,23,141,77;FS=0;IDV=21;IMF=1;MQ=60;MQ0F=0;RPBZ=-1.58153;SCBZ=-1.58317;SGB=-0.692352;VDB=0.442083;INDEL;INS;TV	1/1:255,63,0:21:0:0,14:0,7:0,21	1/1:255,64,0:26:0:1,15:0,10:1,25	1/1:255,37,0:17:0:0,10:1,6:1,16	1/1:255,39,0:13:0:0,8:0,5:0,13	1/1:255,45,0:15:0:0,12:0,3:0,15	0/1:255,0,23:.:.:.:.:.	0/1:255,0,174:.:.:.:.:.	0/1:246,0,132:.:.:.:.:.	0/1:255,0,7:.:.:.:.:.	0/1:255,0,86:.:.:.:.:.	12	17	21	28	24	23	29	21	15	17	CACTIG010000011.1	18213668	18251671	NC_048345.1|19497749|19535997|-1|XM_034053187.2|XP_033909078.2|CD82_antigen-like,_transcript_variant_X2|38249	0
CACTIG010000011.1	18375448	.	T	G	225.417	SNP	AC=20;AD=7,13;ADF=5,8;ADR=2,5;AN=30;BQBZ=0.775781;DP=367;DP4=32,12,124,182;FS=0;MQ=60;MQ0F=0;MQBZ=-0.534522;MQSBZ=1.61245;RPBZ=-0.0494141;SCBZ=0.620174;SGB=-0.69311;VDB=0.74611;SNP;TV	1/1:255,93,0:31:0:0,14:0,17:0,31	1/1:255,87,0:29:0:0,12:0,17:0,29	1/1:255,51,0:17:0:0,12:0,5:0,17	1/1:255,72,0:24:0:0,10:0,14:0,24	1/1:255,87,0:29:0:0,16:0,13:0,29	0/1:246,0,78:.:.:.:.:.	0/1:255,0,20:.:.:.:.:.	0/1:255,0,22:.:.:.:.:.	0/1:255,0,78:.:.:.:.:.	0/1:247,0,171:.:.:.:.:.	25	34	32	24	26	31	35	24	27	31	CACTIG010000011.1	18326024	18377179	NC_048345.1|19369899|19421356|1|XM_034054288.2|XP_033910179.2|tumor_protein_p53-inducible_protein_11-like,_transcript_variant_X2|51458	0
CACTIG010000011.1	18375592	.	C	T	225.417	SNP	AC=20;AD=6,21;ADF=2,11;ADR=4,10;AN=30;BQBZ=1.79524;DP=403;DP4=32,40,162,146;FS=0;MQ=58;MQ0F=0;MQBZ=-1.1368;MQSBZ=0.151018;RPBZ=-0.449688;SCBZ=0.784465;SGB=-0.693054;VDB=0.0791251;SNP;TS	1/1:255,84,0:28:0:0,14:0,14:0,28	1/1:255,51,0:17:0:0,5:0,12:0,17	1/1:255,75,0:25:0:0,12:0,13:0,25	1/1:255,90,0:30:0:0,20:0,10:0,30	1/1:255,96,0:32:0:0,17:0,15:0,32	0/1:255,0,204:.:.:.:.:.	0/1:250,0,195:.:.:.:.:.	0/1:255,0,73:.:.:.:.:.	0/1:255,0,117:.:.:.:.:.	0/1:255,0,80:.:.:.:.:.	32	25	29	25	29	30	21	26	36	36	CACTIG010000011.1	18326024	18377179	NC_048345.1|19369899|19421356|1|XM_034054288.2|XP_033910179.2|tumor_protein_p53-inducible_protein_11-like,_transcript_variant_X2|51458	0
CACTIG010000011.1	18431766	.	T	C	228.229	SNP	AC=20;AD=2,9;ADF=1,6;ADR=1,3;AN=30;BQBZ=0.460566;DP=293;DP4=58,24,128,76;FS=0;MQ=52;MQ0F=0;MQBZ=3.59487;MQSBZ=0.407039;RPBZ=1.82977;SCBZ=-1.14018;SGB=-0.680642;VDB=0.242177;SNP;TS	1/1:205,19,0:14:0:2,11:0,1:2,12	1/1:255,48,0:16:0:0,10:0,6:0,16	1/1:255,20,0:17:0:2,11:0,4:2,15	1/1:255,26,0:25:3:3,16:0,6:3,22	1/1:255,29,0:21:3:2,12:0,7:2,19	0/1:231,0,246:.:.:.:.:.	0/1:224,0,98:.:.:.:.:.	0/1:229,0,166:.:.:.:.:.	0/1:255,0,30:.:.:.:.:.	0/1:204,0,38:.:.:.:.:.	31	22	27	30	18	22	27	23	35	28	CACTIG010000011.1	18430400	18439562	NC_048345.1|19307357|19316637|-1|XM_034053561.2|XP_033909452.1|synaptotagmin-6-like,_transcript_variant_X8|9281	0
CACTIG010000011.1	18461107	.	T	C	228.263	SNP	AC=20;AD=6,28;ADF=2,15;ADR=4,13;AN=30;BQBZ=-0.720687;DP=522;DP4=56,45,200,204;FS=0;MQ=55;MQ0F=0;MQBZ=2.04248;MQSBZ=-2.45927;RPBZ=-0.597835;SCBZ=0.271992;SGB=-0.693054;VDB=0.776281;SNP;TS	1/1:255,50,0:29:0:1,16:0,12:1,28	1/1:255,47,0:28:0:1,13:0,14:1,27	1/1:255,72,0:24:0:0,15:0,9:0,24	1/1:255,43,0:36:3:2,13:1,20:3,33	1/1:255,8,0:26:3:2,15:0,9:2,24	0/1:255,0,127:.:.:.:.:.	0/1:255,0,169:.:.:.:.:.	0/1:255,0,187:.:.:.:.:.	0/1:255,0,182:.:.:.:.:.	0/1:255,0,66:.:.:.:.:.	36	36	45	40	34	31	30	25	41	27	CACTIG010000011.1	18456842	18474333	NC_048345.1|19272662|19289609|1|XM_034053652.2|XP_033909543.1|choline_kinase_alpha-like|16948	0
CACTIG010000011.1	18477811	.	GCAT	G	225.417	DEL	AC=20;AD=13,16;ADF=7,9;ADR=6,7;AN=30;DP=357;DP4=44,44,124,120;FS=0;IDV=27;IMF=0.870968;MQ=59;MQ0F=0;MQBZ=-0.3849;MQSBZ=-1;RPBZ=-3.18745;SCBZ=-2.59808;SGB=-0.693021;VDB=0.0147775;DEL;INDEL;TV	1/1:255,81,0:27:0:0,15:0,12:0,27	1/1:255,51,0:17:0:0,7:0,10:0,17	1/1:255,60,0:20:0:0,10:0,10:0,20	1/1:255,63,0:21:0:0,10:0,11:0,21	1/1:255,45,0:15:0:0,6:0,9:0,15	0/1:255,0,107:.:.:.:.:.	0/1:255,0,158:.:.:.:.:.	0/1:191,0,255:.:.:.:.:.	0/1:255,0,88:.:.:.:.:.	0/1:255,0,243:.:.:.:.:.	16	26	23	26	31	31	19	22	25	18	CACTIG010000011.1	18476628	18485895	NC_048345.1|19261043|19270364|1|XM_034054286.2|XP_033910177.2|histone-lysine_N-methyltransferase_KMT5B-like,_transcript_variant_X3|9322	0
CACTIG010000011.1	18479186	.	T	C	206.417	SNP	AC=20;AD=7,4;ADF=7,4;ADR=0,0;AN=30;BQBZ=-0.966189;DP=235;DP4=42,18,146,5;FS=0;MQ=50;MQ0F=0;MQBZ=-1.85421;MQSBZ=0.825723;RPBZ=0.570396;SCBZ=2.17787;SGB=-0.680642;VDB=0.0782672;SNP;TS	1/1:235,36,0:12:0:0,11:0,1:0,12	1/1:185,39,0:13:0:0,13:0,0:0,13	1/1:220,27,0:9:0:0,8:0,1:0,9	1/1:236,60,0:20:0:0,19:0,1:0,20	1/1:189,39,0:13:0:0,13:0,0:0,13	0/1:99,0,167:.:.:.:.:.	0/1:164,0,122:.:.:.:.:.	0/1:108,0,141:.:.:.:.:.	0/1:156,0,79:.:.:.:.:.	0/1:76,0,130:.:.:.:.:.	16	19	23	31	20	23	19	26	40	27	CACTIG010000011.1	18476628	18485895	NC_048345.1|19261043|19270364|1|XM_034054286.2|XP_033910177.2|histone-lysine_N-methyltransferase_KMT5B-like,_transcript_variant_X3|9322	0
CACTIG010000011.1	18481118	.	G	A	173.416	SNP	AC=20;AD=6,5;ADF=6,5;ADR=0,0;AN=30;BQBZ=2.03338;DP=230;DP4=62,13,132,4;FS=0;MQ=47;MQ0F=0;MQBZ=2.03338;MQSBZ=-1.37661;RPBZ=-2.17423;SCBZ=-2.4756;SGB=-0.680642;VDB=0.114178;SNP;TS	1/1:188,36,0:12:0:0,12:0,0:0,12	1/1:175,19,0:13:0:2,10:0,1:2,11	1/1:152,14,0:10:0:0,9:1,0:1,9	1/1:203,33,0:11:0:0,10:0,1:0,11	1/1:167,27,0:9:0:0,9:0,0:0,9	0/1:111,0,246:.:.:.:.:.	0/1:150,0,58:.:.:.:.:.	0/1:103,0,148:.:.:.:.:.	0/1:149,0,204:.:.:.:.:.	0/1:103,0,101:.:.:.:.:.	20	22	23	28	15	13	17	13	12	10	CACTIG010000011.1	18476628	18485895	NC_048345.1|19261043|19270364|1|XM_034054286.2|XP_033910177.2|histone-lysine_N-methyltransferase_KMT5B-like,_transcript_variant_X3|9322	0
CACTIG010000011.1	18481138	.	A	G	222.354	SNP	AC=20;AD=3,12;ADF=3,12;ADR=0,0;AN=30;BQBZ=-0.23355;DP=286;DP4=58,33,161,8;FS=0;MQ=44;MQ0F=0;MQBZ=1.72502;MQSBZ=-3.09345;RPBZ=0.694986;SCBZ=-1.77146;SGB=-0.686358;VDB=0.366444;SNP;TS	1/1:171,25,0:15:0:1,14:0,0:1,14	1/1:249,44,0:19:0:0,14:1,4:1,18	1/1:150,14,0:11:0:1,9:1,0:2,9	1/1:227,28,0:13:0:1,10:0,2:1,12	1/1:169,16,0:14:0:1,12:1,0:2,12	0/1:87,0,255:.:.:.:.:.	0/1:133,0,47:.:.:.:.:.	0/1:147,0,55:.:.:.:.:.	0/1:138,0,255:.:.:.:.:.	0/1:149,0,16:.:.:.:.:.	33	25	30	45	28	20	35	17	33	23	CACTIG010000011.1	18476628	18485895	NC_048345.1|19261043|19270364|1|XM_034054286.2|XP_033910177.2|histone-lysine_N-methyltransferase_KMT5B-like,_transcript_variant_X3|9322	0
CACTIG010000011.1	18481269	.	G	A	225.417	SNP	AC=20;AD=16,10;ADF=11,5;ADR=5,5;AN=30;BQBZ=-0.824678;DP=416;DP4=82,52,144,130;FS=0;MQ=60;MQ0F=0;RPBZ=-0.470728;SCBZ=0.540062;SGB=-0.69312;VDB=0.877663;SNP;TS	1/1:255,96,0:32:0:0,18:0,14:0,32	1/1:255,84,0:28:0:0,15:0,13:0,28	1/1:255,72,0:24:0:0,14:0,10:0,24	1/1:255,84,0:28:0:0,19:0,9:0,28	1/1:255,48,0:16:0:0,6:0,10:0,16	0/1:121,0,243:.:.:.:.:.	0/1:255,0,118:.:.:.:.:.	0/1:255,0,255:.:.:.:.:.	0/1:255,0,255:.:.:.:.:.	0/1:202,0,255:.:.:.:.:.	21	32	34	36	28	36	30	24	29	18	CACTIG010000011.1	18476628	18485895	NC_048345.1|19261043|19270364|1|XM_034054286.2|XP_033910177.2|histone-lysine_N-methyltransferase_KMT5B-like,_transcript_variant_X3|9322	0
CACTIG010000011.1	18481379	.	C	G	225.417	SNP	AC=20;AD=16,16;ADF=9,9;ADR=7,7;AN=30;BQBZ=1.00561;DP=394;DP4=76,62,95,140;FS=0;MQ=55;MQ0F=0;MQBZ=-1.79139;MQSBZ=-0.550602;RPBZ=1.31325;SCBZ=-0.5;SGB=-0.692067;VDB=0.0400515;SNP;TV	1/1:255,60,0:20:0:0,9:0,11:0,20	1/1:255,90,0:30:0:0,16:0,14:0,30	1/1:255,45,0:15:0:0,6:0,9:0,15	1/1:255,87,0:29:0:0,9:0,20:0,29	1/1:255,45,0:15:0:0,9:0,6:0,15	0/1:154,0,255:.:.:.:.:.	0/1:255,0,157:.:.:.:.:.	0/1:59,0,255:.:.:.:.:.	0/1:152,0,185:.:.:.:.:.	0/1:231,0,255:.:.:.:.:.	26	36	27	21	35	24	31	15	31	16	CACTIG010000011.1	18476628	18485895	NC_048345.1|19261043|19270364|1|XM_034054286.2|XP_033910177.2|histone-lysine_N-methyltransferase_KMT5B-like,_transcript_variant_X3|9322	0
CACTIG010000011.1	18481505	.	C	T	225.417	SNP	AC=20;AD=20,19;ADF=6,7;ADR=14,12;AN=30;BQBZ=0.393869;DP=437;DP4=54,82,148,136;FS=0;MQ=41;MQ0F=0;MQBZ=-2.30587;MQSBZ=1.87544;RPBZ=1.16164;SGB=-0.693141;VDB=0.654261;SNP;TS	1/1:255,111,0:37:0:0,18:0,19:0,37	1/1:255,84,0:28:0:0,10:0,18:0,28	1/1:255,75,0:25:0:0,16:0,9:0,25	1/1:255,87,0:29:0:0,18:0,11:0,29	1/1:255,42,0:14:0:0,6:0,8:0,14	0/1:102,0,237:.:.:.:.:.	0/1:255,0,143:.:.:.:.:.	0/1:136,0,255:.:.:.:.:.	0/1:212,0,223:.:.:.:.:.	0/1:255,0,255:.:.:.:.:.	19	42	26	25	39	38	28	26	30	14	CACTIG010000011.1	18476628	18485895	NC_048345.1|19261043|19270364|1|XM_034054286.2|XP_033910177.2|histone-lysine_N-methyltransferase_KMT5B-like,_transcript_variant_X3|9322	0
CACTIG010000011.1	18482664	.	G	A	225.421	SNP	AC=20;AD=15,17;ADF=10,10;ADR=5,7;AN=30;BQBZ=-2.88437;DP=414;DP4=62,38,145,153;FS=0;MQ=55;MQ0F=0;MQBZ=-1.06066;MQSBZ=1.73525;RPBZ=-0.289207;SGB=-0.69168;VDB=0.610983;SNP;TS	1/1:255,54,0:19:0:0,9:0,9:0,18	1/1:255,111,0:37:0:0,19:0,18:0,37	1/1:255,75,0:25:0:0,15:0,10:0,25	1/1:255,75,0:25:0:0,7:0,18:0,25	1/1:255,54,0:18:0:0,10:0,8:0,18	0/1:139,0,204:.:.:.:.:.	0/1:255,0,190:.:.:.:.:.	0/1:255,0,192:.:.:.:.:.	0/1:255,0,81:.:.:.:.:.	0/1:255,0,255:.:.:.:.:.	18	26	34	31	36	20	38	26	25	19	CACTIG010000011.1	18476628	18485895	NC_048345.1|19261043|19270364|1|XM_034054286.2|XP_033910177.2|histone-lysine_N-methyltransferase_KMT5B-like,_transcript_variant_X3|9322	0
CACTIG010000011.1	18482965	.	G	T	228.399	SNP	AC=20;AD=19,11;ADF=6,6;ADR=13,5;AN=30;BQBZ=1.73864;DP=467;DP4=53,68,159,173;FS=0;MQ=45;MQ0F=0;MQBZ=-0.990761;MQSBZ=-1.62772;RPBZ=1.08607;SCBZ=1.11803;SGB=-0.693021;VDB=0.121495;SNP;TV	1/1:255,81,0:27:0:0,10:0,17:0,27	1/1:255,105,0:35:0:0,23:0,12:0,35	1/1:255,63,0:21:0:0,7:0,14:0,21	1/1:255,114,0:38:0:0,18:0,20:0,38	1/1:255,58,0:24:0:1,9:0,14:1,23	0/1:255,0,188:.:.:.:.:.	0/1:255,0,124:.:.:.:.:.	0/1:214,0,229:.:.:.:.:.	0/1:255,0,167:.:.:.:.:.	0/1:176,0,255:.:.:.:.:.	32	32	27	40	30	27	35	21	40	24	CACTIG010000011.1	18476628	18485895	NC_048345.1|19261043|19270364|1|XM_034054286.2|XP_033910177.2|histone-lysine_N-methyltransferase_KMT5B-like,_transcript_variant_X3|9322	0
CACTIG010000011.1	18483041	.	T	C	225.417	SNP	AC=20;AD=15,13;ADF=6,6;ADR=9,7;AN=30;BQBZ=0.973286;DP=462;DP4=50,66,171,160;FS=0;MQ=60;MQ0F=0;MQSBZ=0.917663;RPBZ=1.58733;SCBZ=1.6641;SGB=-0.692914;VDB=0.136029;SNP;TS	1/1:255,75,0:25:0:0,12:0,13:0,25	1/1:255,105,0:35:0:0,19:0,16:0,35	1/1:255,45,0:15:0:0,7:0,8:0,15	1/1:255,126,0:42:0:0,23:0,19:0,42	1/1:255,72,0:24:0:0,14:0,10:0,24	0/1:255,0,185:.:.:.:.:.	0/1:255,0,71:.:.:.:.:.	0/1:234,0,255:.:.:.:.:.	0/1:255,0,219:.:.:.:.:.	0/1:244,0,253:.:.:.:.:.	26	39	29	39	29	26	36	16	42	25	CACTIG010000011.1	18476628	18485895	NC_048345.1|19261043|19270364|1|XM_034054286.2|XP_033910177.2|histone-lysine_N-methyltransferase_KMT5B-like,_transcript_variant_X3|9322	0
CACTIG010000011.1	18483101	.	G	T	225.417	SNP	AC=20;AD=12,11;ADF=5,8;ADR=7,3;AN=30;BQBZ=0.428516;DP=437;DP4=50,60,156,158;FS=0;MQ=60;MQ0F=0;RPBZ=0.985219;SGB=-0.692831;VDB=0.992613;SNP;TV	1/1:255,72,0:24:0:0,11:0,13:0,24	1/1:255,96,0:32:0:0,16:0,16:0,32	1/1:255,60,0:20:0:0,8:0,12:0,20	1/1:255,99,0:33:0:0,21:0,12:0,33	1/1:255,69,0:23:0:0,10:0,13:0,23	0/1:220,0,236:.:.:.:.:.	0/1:255,0,52:.:.:.:.:.	0/1:230,0,255:.:.:.:.:.	0/1:255,0,92:.:.:.:.:.	0/1:202,0,222:.:.:.:.:.	23	38	31	37	24	26	34	21	34	25	CACTIG010000011.1	18476628	18485895	NC_048345.1|19261043|19270364|1|XM_034054286.2|XP_033910177.2|histone-lysine_N-methyltransferase_KMT5B-like,_transcript_variant_X3|9322	0
CACTIG010000011.1	18483140	.	C	A	225.417	SNP	AC=20;AD=13,17;ADF=6,11;ADR=7,6;AN=30;BQBZ=-0.03231;DP=435;DP4=56,50,153,164;FS=0;MQ=60;MQ0F=0;MQSBZ=1.05409;RPBZ=0.375523;SCBZ=-1;SGB=-0.692914;VDB=0.258975;SNP;TV	1/1:255,75,0:25:0:0,15:0,10:0,25	1/1:255,114,0:38:0:0,18:0,20:0,38	1/1:255,54,0:18:0:0,8:0,10:0,18	1/1:255,87,0:29:0:0,11:0,18:0,29	1/1:255,63,0:21:0:0,11:0,10:0,21	0/1:218,0,234:.:.:.:.:.	0/1:255,0,129:.:.:.:.:.	0/1:195,0,255:.:.:.:.:.	0/1:255,0,21:.:.:.:.:.	0/1:255,0,228:.:.:.:.:.	25	37	29	31	31	26	39	18	31	23	CACTIG010000011.1	18476628	18485895	NC_048345.1|19261043|19270364|1|XM_034054286.2|XP_033910177.2|histone-lysine_N-methyltransferase_KMT5B-like,_transcript_variant_X3|9322	0
CACTIG010000011.1	18604032	.	A	G	228.222	SNP	AC=20;AD=4,19;ADF=3,11;ADR=1,8;AN=30;BQBZ=1.42345;DP=321;DP4=27,30,129,115;FS=0;MQ=56;MQ0F=0;MQBZ=-0.0908884;MQSBZ=0.19979;RPBZ=0.251066;SCBZ=1.0113;SGB=-0.69168;VDB=0.104408;SNP;TS	1/1:255,57,0:19:0:0,12:0,7:0,19	1/1:255,39,0:13:0:0,5:0,8:0,13	1/1:255,3,0:25:6:0,11:3,11:3,22	1/1:255,78,0:26:0:0,13:0,13:0,26	1/1:250,20,0:19:0:1,14:0,4:1,18	0/1:244,0,124:.:.:.:.:.	0/1:255,0,61:.:.:.:.:.	0/1:219,0,129:.:.:.:.:.	0/1:251,0,112:.:.:.:.:.	0/1:255,0,67:.:.:.:.:.	28	32	25	26	32	27	22	27	31	23	CACTIG010000011.1	18595492	18626988	NC_048345.1|19122529|19154301|-1|XM_034053826.2|XP_033909717.1|serine/threonine-protein_phosphatase_6_regulatory_subunit_3-like,_transcript_variant_X2|31773	0
CACTIG010000011.1	19247777	.	G	A	228.29	SNP	AC=20;AD=8,21;ADF=5,14;ADR=3,7;AN=30;BQBZ=0.339748;DP=486;DP4=53,59,179,187;FS=0;MQ=60;MQ0F=0;RPBZ=0;SCBZ=0.963624;SGB=-0.693147;VDB=0.957075;SNP;TS	1/1:255,166,0:55:0:0,28:0,27:0,55	1/1:255,60,0:20:0:0,8:0,12:0,20	1/1:255,2,0:25:0:1,10:1,13:2,23	1/1:255,102,0:34:0:0,21:0,13:0,34	1/1:255,96,0:32:0:0,14:0,18:0,32	0/1:255,0,175:.:.:.:.:.	0/1:255,0,179:.:.:.:.:.	0/1:255,0,251:.:.:.:.:.	0/1:255,0,246:.:.:.:.:.	0/1:255,0,153:.:.:.:.:.	33	35	37	27	30	56	22	25	34	34	CACTIG010000011.1	19238799	19273275	NC_048345.1|18479965|18514602|-1|XM_034054012.2|XP_033909903.2|phosphatidylinositol_4-phosphate_3-kinase_C2_domain-containing_subunit_alpha-like,_transcript_variant_X1|34638	0
CACTIG010000011.1	20089097	.	tggggggggttg	tgggggttg,t	228.386	DEL	AC=18,2;AD=3,5,7;ADF=2,2,1;ADR=1,3,6;AN=26;BQBZ=-1.8197;DP=236;DP4=19,10,47,63;FS=0;IDV=16;IMF=0.64;MQ=56;MQ0F=0;MQBZ=1.20386;MQSBZ=0.253645;RPBZ=-2.01095;SCBZ=-1.9245;SGB=-0.689466;VDB=0.158305;DEL;INDEL;TV	1/1:255,44,30,.,.,.:19:0:2,7,.:1,7,.:3,14,.	1/1:236,10,0,.,.,.:12:3:1,6,.:2,3,.:3,9,.	1/1:255,24,0,.,.,.:8:0:0,5,.:0,3,.:0,8,.	1/1:255,13,0,.,.,.:10:0:1,4,.:1,4,.:2,8,.	1/1:255,25,0,.,.,.:12:0:1,4,.:0,7,.:1,11,.	0/1:242,0,11,.,.,.:.:.:.:.:.	./.:.:.:.:.:.:.	0/1:104,0,30,.,.,.:.:.:.:.:.	1/2:255,188,164,216,0,195:.:.:.:.:.	0/1:144,0,49,.,.,.:.:.:.:.:.	16	8	19	19	11	25	25	11	18	16	CACTIG010000011.1	20101994	20126422	NC_048345.1|17582448|17607033|1|XM_034054340.2|XP_033910231.1|rhombotin-1|24586	12897
CACTIG010000011.1	20466129	.	a	aACATAT,aT,aACATATATATATAT,aACATATATATATATATAT	225.417	INS	AC=12,2,4,2;AD=0,1,7,2,1;ADF=0,0,5,0,0;ADR=0,1,2,2,1;AN=22;DP=109;DP4=16,2,24,35;FS=0;IDV=9;IMF=0.75;MQ=49;MQ0F=0;MQBZ=0.927831;MQSBZ=0;RPBZ=-2.50053;SCBZ=-2.55841;SGB=-0.662043;VDB=0.00851302;INDEL;INS;TV	1/1:255,27,0,.,.,.,.,.,.,.,.,.,.,.,.:9:0:0,5,.,.,.:0,4,.,.,.:0,9,.,.,.	1/1:166,9,0,.,.,.,.,.,.,.,.,.,.,.,.:3:0:0,2,.,.,.:0,1,.,.,.:0,3,.,.,.	1/1:255,18,0,.,.,.,.,.,.,.,.,.,.,.,.:6:0:0,2,.,.,.:0,4,.,.,.:0,6,.,.,.	1/1:203,12,0,.,.,.,.,.,.,.,.,.,.,.,.:4:0:0,2,.,.,.:0,2,.,.,.:0,4,.,.,.	1/1:160,9,0,.,.,.,.,.,.,.,.,.,.,.,.:3:0:0,1,.,.,.:0,2,.,.,.:0,3,.,.,.	0/2:141,.,.,11,.,49,.,.,.,.,.,.,.,.,.:.:.:.:.:.	./.:.:.:.:.:.:.	3/4:161,.,.,.,.,.,57,.,.,51,109,.,.,0,106:.:.:.:.:.	3/1:152,101,98,.,.,.,56,0,.,50,.,.,.,.,.:.:.:.:.:.	./.:.:.:.:.:.:.	22	3	5	5	4	12	8	10	5	11	CACTIG010000011.1	20457197	20498236	NC_048345.1|17224265|17265275|1|XM_034054279.2|XP_033910170.1|DENN_domain-containing_protein_5A,_transcript_variant_X1|41011	0
CACTIG010000011.1	25913274	.	A	G,T	228.291	SNP	AC=20,6;AD=1,18,7;ADF=0,6,3;ADR=1,12,4;AN=30;BQBZ=1.83672;DP=447;DP4=22,18,178,191;FS=0;MQ=60;MQ0F=0;RPBZ=1.67032;SCBZ=0.415526;SGB=-0.689466;VDB=0.397251;SNP;TS;TV	1/1:255,48,0,.,.,.:16:0:0,5,.:0,11,.:0,16,.	1/1:255,50,0,.,.,.:27:0:0,10,.:1,16,.:1,26,.	1/1:255,13,0,.,.,.:32:0:2,16,.:1,13,.:3,29,.	1/1:255,72,0,.,.,.:24:0:0,13,.:0,11,.:0,24,.	1/1:255,88,31,.,.,.:22:0:0,10,.:0,9,.:0,19,.	1/2:255,205,124,255,0,255:.:.:.:.:.	1/2:255,197,174,255,0,255:.:.:.:.:.	0/1:255,0,148,.,.,.:.:.:.:.:.	0/1:255,0,124,.,.,.:.:.:.:.:.	1/2:255,208,165,255,0,255:.:.:.:.:.	38	30	32	29	27	20	33	35	29	24	CACTIG010000011.1	25808069	25881426	NC_048345.1|11810752|11884057|1|XM_034053385.2|XP_033909276.1|leucine_zipper_protein_2-like,_transcript_variant_X1|73306	31848
CACTIG010000011.1	26032804	.	G	A	225.417	SNP	AC=20;AD=6,19;ADF=5,8;ADR=1,11;AN=30;BQBZ=0;DP=394;DP4=54,24,160,144;FS=0;MQ=59;MQ0F=0;MQBZ=-0.853559;MQSBZ=1.33524;RPBZ=0.335614;SCBZ=-0.881549;SGB=-0.692976;VDB=0.19105;SNP;TS	1/1:255,78,0:26:0:0,14:0,12:0,26	1/1:255,84,0:28:0:0,14:0,14:0,28	1/1:255,72,0:24:0:0,13:0,11:0,24	1/1:255,90,0:30:0:0,15:0,15:0,30	1/1:255,72,0:24:0:0,12:0,12:0,24	0/1:255,0,40:.:.:.:.:.	0/1:238,0,188:.:.:.:.:.	0/1:234,0,255:.:.:.:.:.	0/1:255,0,26:.:.:.:.:.	0/1:255,0,104:.:.:.:.:.	25	23	35	24	27	26	29	26	30	24	CACTIG010000011.1	26035119	26053534	NC_048345.1|11636387|11654803|1|XM_034054031.2|XP_033909922.2|vesicular_glutamate_transporter_2|18417	2315
CACTIG010000011.1	26035929	.	C	T	228.24	SNP	AC=20;AD=5,15;ADF=2,4;ADR=3,11;AN=30;BQBZ=1.91133;DP=428;DP4=39,34,144,196;FS=0;MQ=60;MQ0F=0;RPBZ=1.34244;SGB=-0.69312;VDB=0.0580762;SNP;TS	1/1:255,96,0:32:0:0,22:0,10:0,32	1/1:255,30,0:22:0:1,8:0,13:1,21	1/1:255,75,0:25:0:0,10:0,15:0,25	1/1:255,99,0:33:0:0,15:0,18:0,33	1/1:255,99,0:33:0:0,19:0,14:0,33	0/1:255,0,126:.:.:.:.:.	0/1:255,0,28:.:.:.:.:.	0/1:255,0,194:.:.:.:.:.	0/1:255,0,184:.:.:.:.:.	0/1:253,0,127:.:.:.:.:.	28	22	42	25	21	35	23	27	37	36	CACTIG010000011.1	26035119	26053534	NC_048345.1|11636387|11654803|1|XM_034054031.2|XP_033909922.2|vesicular_glutamate_transporter_2|18417	0
CACTIG010000011.1	26449634	.	A	T	225.417	SNP	AC=20;AD=6,11;ADF=3,5;ADR=3,6;AN=30;BQBZ=0.059073;DP=310;DP4=50,50,90,101;FS=0;MQ=59;MQ0F=0;MQBZ=-0.829156;MQSBZ=-0.882735;RPBZ=2.12287;SCBZ=1.49248;SGB=-0.688148;VDB=0.0622971;SNP;TV	1/1:255,45,0:15:0:0,4:0,11:0,15	1/1:255,45,0:15:0:0,10:0,5:0,15	1/1:190,21,0:7:0:0,4:0,3:0,7	1/1:255,54,0:18:0:0,10:0,8:0,18	1/1:255,54,0:18:0:0,8:0,10:0,18	0/1:255,0,213:.:.:.:.:.	0/1:208,0,84:.:.:.:.:.	0/1:104,0,255:.:.:.:.:.	0/1:255,0,119:.:.:.:.:.	0/1:238,0,139:.:.:.:.:.	32	16	28	23	18	17	18	8	19	19	CACTIG010000011.1	26442621	26461720	NC_048345.1|11203926|11223128|1|XM_034053880.2|XP_033909771.2|AP-2_complex_subunit_alpha-2|19203	0
CACTIG010000011.1	26449635	.	T	G	225.417	SNP	AC=20;AD=6,11;ADF=3,5;ADR=3,6;AN=30;BQBZ=-0.222379;DP=306;DP4=50,50,90,101;FS=0;MQ=59;MQ0F=0;MQBZ=-0.829156;MQSBZ=-0.882735;RPBZ=2.12287;SCBZ=1.49172;SGB=-0.688148;VDB=0.0622971;SNP;TV	1/1:255,45,0:15:0:0,4:0,11:0,15	1/1:255,45,0:15:0:0,10:0,5:0,15	1/1:199,21,0:7:0:0,4:0,3:0,7	1/1:255,54,0:18:0:0,10:0,8:0,18	1/1:255,54,0:18:0:0,8:0,10:0,18	0/1:255,0,215:.:.:.:.:.	0/1:207,0,84:.:.:.:.:.	0/1:95,0,255:.:.:.:.:.	0/1:255,0,126:.:.:.:.:.	0/1:239,0,131:.:.:.:.:.	32	16	28	23	18	17	18	8	19	19	CACTIG010000011.1	26442621	26461720	NC_048345.1|11203926|11223128|1|XM_034053880.2|XP_033909771.2|AP-2_complex_subunit_alpha-2|19203	0
CACTIG010000011.1	26449636	.	G	A	225.417	SNP	AC=20;AD=6,11;ADF=3,5;ADR=3,6;AN=30;BQBZ=-1.88876;DP=304;DP4=48,48,90,101;FS=0;MQ=59;MQ0F=0;MQBZ=-0.829156;MQSBZ=-0.882735;RPBZ=2.12287;SCBZ=1.49172;SGB=-0.688148;VDB=0.0622971;SNP;TS	1/1:255,45,0:15:0:0,4:0,11:0,15	1/1:255,45,0:15:0:0,10:0,5:0,15	1/1:204,21,0:7:0:0,4:0,3:0,7	1/1:255,54,0:18:0:0,10:0,8:0,18	1/1:255,54,0:18:0:0,8:0,10:0,18	0/1:255,0,215:.:.:.:.:.	0/1:207,0,93:.:.:.:.:.	0/1:105,0,255:.:.:.:.:.	0/1:255,0,124:.:.:.:.:.	0/1:237,0,125:.:.:.:.:.	31	16	28	23	18	17	18	8	18	18	CACTIG010000011.1	26442621	26461720	NC_048345.1|11203926|11223128|1|XM_034053880.2|XP_033909771.2|AP-2_complex_subunit_alpha-2|19203	0
CACTIG010000012.1	157634	.	G	GTGCGCTA,GTGCACTA,GTGAGCTA	153.416	INS	AC=10,6,4;AD=10,3,3,3;ADF=7,3,3,3;ADR=3,0,0,0;AN=22;DP=133;DP4=14,6,61,5;FS=0;IDV=2;IMF=0.2;MQ=32;MQ0F=0;MQBZ=-0.664994;MQSBZ=-1.95468;RPBZ=-2.23607;SCBZ=-1.19523;SGB=-0.590765;VDB=0.631784;INDEL;INS;TV	1/1:108,15,0,.,.,.,.,.,.,.:5:0:0,3,.,.:0,2,.,.:0,5,.,.	1/1:135,18,0,.,.,.,.,.,.,.:6:0:0,4,.,.:0,2,.,.:0,6,.,.	1/1:76,12,0,.,.,.,.,.,.,.:4:0:0,3,.,.:0,1,.,.:0,4,.,.	1/1:162,21,0,.,.,.,.,.,.,.:7:0:0,7,.,.:0,0,.,.:0,7,.,.	1/1:71,9,0,.,.,.,.,.,.,.:3:0:0,3,.,.:0,0,.,.:0,3,.,.	./.:.:.:.:.:.:.	./.:.:.:.:.:.:.	2/2:183,.,.,42,.,0,.,.,.,.:.:.:.:.:.	3/3:52,.,.,.,.,.,9,.,.,0:.:.:.:.:.	0/2:43,.,.,0,.,205,.,.,.,.:.:.:.:.:.	4	7	19	5	20	10	9	7	15	5	CACTIG010000012.1	135777	155533	NC_048345.1|2074418|2094305|1|XM_034904975.1|XP_034760866.1|tumor_protein_p73-like,_transcript_variant_X3|19888	2101
CACTIG010000012.1	1720550	.	aat	a	228.3	DEL	AC=18;AD=15,9;ADF=3,7;ADR=12,2;AN=26;DP=352;DP4=78,85,84,64;FS=0;IDV=7;IMF=0.4375;MQ=60;MQ0F=0;MQBZ=1.28812;MQSBZ=1.41421;RPBZ=-0.265018;SCBZ=0.708609;SGB=-0.662043;VDB=0.117091;DEL;INDEL;TV	1/1:255,10,0:13:0:3,6:1,3:4,9	1/1:180,4,0:11:3:3,5:2,1:5,6	1/1:255,8,0:19:14:5,3:1,10:6,13	1/1:225,8,0:38:0:18,10:7,3:25,13	1/1:255,46,0:28:0:1,12:2,13:3,25	0/1:97,0,58:.:.:.:.:.	0/1:255,0,72:.:.:.:.:.	./.:.:.:.:.:.:.	0/1:186,0,20:.:.:.:.:.	0/1:152,0,31:.:.:.:.:.	24	43	34	33	29	16	20	30	40	36	CACTIG010000012.1	1679064	1720085	NC_048344.1|24753274|24793922|1|XM_034042553.2|XP_033898444.1|transmembrane_protein_201-like,_transcript_variant_X2|40649	465
CACTIG010000012.1	1986662	.	A	C,T	62.4147	SNP	AC=10,4;AD=0,7,1;ADF=0,2,1;ADR=0,5,0;AN=14;DP=32;DP4=0,0,9,22;FS=0;MQ=40;MQ0F=0;MQSBZ=1;SGB=-0.453602;VDB=0.66;SNP;TV	1/1:66,6,0,.,.,.:2:0:0,1,.:0,1,.:0,2,.	1/1:84,12,0,.,.,.:4:0:0,2,.:0,2,.:0,4,.	1/1:62,15,0,.,.,.:5:0:0,2,.:0,3,.:0,5,.	1/1:85,21,0,.,.,.:7:0:0,0,.:0,7,.:0,7,.	1/1:92,21,0,.,.,.:7:0:0,2,.:0,5,.:0,7,.	2/2:56,.,.,28,.,25:.:.:.:.:.	./.:.:.:.:.:.:.	./.:.:.:.:.:.:.	./.:.:.:.:.:.:.	./.:.:.:.:.:.:.	3	6	5	2	11	2	4	6	7	8	CACTIG010000012.1	1949989	2081031	NC_048344.1|24389414|24517222|-1|XM_034904235.1|XP_034760126.1|arginine-glutamic_acid_dipeptide_repeats_protein-like,_transcript_variant_X5|127809	0
CACTIG010000012.1	2255592	.	G	T	228.18	SNP	AC=20;AD=10,18;ADF=8,14;ADR=2,4;AN=30;BQBZ=-1.61941;DP=491;DP4=69,30,221,147;FS=0;MQ=33;MQ0F=0;MQBZ=-1.70763;MQSBZ=-3.56803;RPBZ=1.47687;SCBZ=-0.970142;SGB=-0.69168;VDB=0.202026;SNP;TV	1/1:255,57,0:19:0:0,11:0,8:0,19	1/1:255,90,0:30:0:0,16:0,14:0,30	1/1:235,45,0:15:0:0,9:0,6:0,15	1/1:255,123,0:42:0:0,24:0,17:0,41	1/1:255,22,0:20:0:1,10:0,9:1,19	0/1:245,0,112:.:.:.:.:.	0/1:234,0,254:.:.:.:.:.	0/1:254,0,118:.:.:.:.:.	0/1:255,0,54:.:.:.:.:.	0/1:216,0,148:.:.:.:.:.	33	33	34	47	28	20	34	19	44	21	CACTIG010000012.1	2248600	2262861	NC_048344.1|24206985|24221942|-1|XM_034904271.1|XP_034760162.1|pleckstrin_homology_domain-containing_family_N_member_1-like,_transcript_variant_X1|14958	0
CACTIG010000012.1	2975214	.	C	A	225.417	SNP	AC=20;AD=8,22;ADF=4,13;ADR=4,9;AN=30;BQBZ=-1.42435;DP=420;DP4=44,30,169,175;FS=0;MQ=29;MQ0F=0;MQBZ=-2.63391;MQSBZ=0.818859;RPBZ=-1.05476;SCBZ=0.475191;SGB=-0.670168;VDB=0.232284;SNP;TV	1/1:167,30,0:10:0:0,2:0,8:0,10	1/1:255,66,0:22:0:0,13:0,9:0,22	1/1:255,60,0:20:0:0,13:0,7:0,20	1/1:255,93,0:31:0:0,13:0,18:0,31	1/1:255,84,0:28:0:0,16:0,12:0,28	0/1:255,0,85:.:.:.:.:.	0/1:240,0,105:.:.:.:.:.	0/1:188,0,20:.:.:.:.:.	0/1:228,0,208:.:.:.:.:.	0/1:243,0,125:.:.:.:.:.	35	32	20	30	30	10	22	20	31	28	CACTIG010000012.1	2960374	2964849	NC_048345.1|5014151|5018973|-1|XM_034904870.1|XP_034760761.1|dolichyl-diphosphooligosaccharide--protein_glycosyltransferase_48_kDa_subunit|4823	10365
CACTIG010000012.1	4769808	.	T	A	228.39	SNP	AC=18;AD=6,14;ADF=6,10;ADR=0,4;AN=26;BQBZ=-1.4635;DP=347;DP4=29,21,94,65;FS=0;MQ=47;MQ0F=0;MQBZ=1.8313;MQSBZ=-0.656647;RPBZ=0.316949;SCBZ=-2.9277;SGB=-0.670168;VDB=0.567012;SNP;TV	1/1:177,23,0:11:0:0,7:1,3:1,10	1/1:236,18,0:15:2:1,7:2,5:3,12	1/1:255,33,0:15:0:0,8:1,6:1,14	1/1:223,13,0:16:0:0,9:1,6:1,15	1/1:255,48,0:16:0:0,9:0,7:0,16	0/1:205,0,31:.:.:.:.:.	./.:.:.:.:.:.:.	0/1:213,0,7:.:.:.:.:.	0/1:216,0,170:.:.:.:.:.	0/1:214,0,88:.:.:.:.:.	28	26	23	26	35	23	28	24	30	23	CACTIG010000012.1	4746473	4812305	NC_048344.1|21385905|21451274|-1|XM_034904502.1|XP_034760393.1|rap1_GTPase-activating_protein_1-like|65370	0
CACTIG010000012.1	5416717	.	T	C	228.393	SNP	AC=16;AD=4,11;ADF=4,7;ADR=0,4;AN=22;BQBZ=1.37795;DP=200;DP4=26,0,83,76;FS=0;MQ=46;MQ0F=0;MQBZ=1.73205;MQSBZ=-0.647141;RPBZ=-0.463739;SCBZ=-3.74166;SGB=-0.683931;VDB=0.276712;SNP;TS	1/1:255,39,0:13:0:0,5:0,8:0,13	1/1:255,33,0:15:0:1,5:0,9:1,14	1/1:94,9,0:3:0:0,1:0,2:0,3	1/1:255,29,0:17:0:1,5:0,11:1,16	1/1:255,57,0:19:0:0,13:0,6:0,19	./.:.:.:.:.:.:.	0/1:255,0,26:.:.:.:.:.	0/1:255,0,16:.:.:.:.:.	0/1:215,0,29:.:.:.:.:.	./.:.:.:.:.:.:.	21	26	20	15	22	15	17	4	19	23	CACTIG010000012.1	5393352	5422044	NC_048345.1|8271459|8300847|-1|XM_034042901.2|XP_033898792.2|ubiquitin_carboxyl-terminal_hydrolase_48-like,_transcript_variant_X2|29389	0
CACTIG010000012.1	5423500	.	C	CT	225.417	INS	AC=14;AD=4,6;ADF=3,2;ADR=1,4;AN=18;DP=232;DP4=8,9,28,45;FS=0;IDV=10;IMF=0.5;MQ=29;MQ0F=0;MQBZ=-1.82872;MQSBZ=-0.221312;RPBZ=-0.945979;SCBZ=-1.8311;SGB=-0.676189;VDB=0.162735;INDEL;INS;TV	1/1:124,33,0:11:0:0,6:0,5:0,11	1/1:255,42,0:14:0:0,6:0,8:0,14	1/1:167,2,0:13:0:1,3:1,8:2,11	1/1:218,27,0:9:0:0,4:0,5:0,9	1/1:75,14,0:9:0:1,3:0,5:1,8	./.:.:.:.:.:.:.	./.:.:.:.:.:.:.	0/1:81,0,12:.:.:.:.:.	./.:.:.:.:.:.:.	0/1:120,0,41:.:.:.:.:.	29	51	30	40	36	30	41	43	35	31	CACTIG010000012.1	5393352	5422044	NC_048345.1|8271459|8300847|-1|XM_034042901.2|XP_033898792.2|ubiquitin_carboxyl-terminal_hydrolase_48-like,_transcript_variant_X2|29389	1456
CACTIG010000012.1	5427611	.	C	T	173.416	SNP	AC=18;AD=19,7;ADF=15,3;ADR=4,4;AN=26;BQBZ=-2.33788;DP=188;DP4=60,38,26,60;FS=0;MQ=43;MQ0F=0;MQBZ=-2.1196;MQSBZ=0.891133;RPBZ=0.565685;SCBZ=1.68325;SGB=-0.616816;VDB=0.52412;SNP;TS	1/1:135,18,0:6:0:0,1:0,5:0,6	1/1:203,27,0:9:0:0,2:0,7:0,9	1/1:129,24,0:8:0:0,1:0,7:0,8	1/1:89,9,0:3:0:0,1:0,2:0,3	1/1:126,24,0:8:0:0,1:0,7:0,8	./.:.:.:.:.:.:.	0/1:145,0,115:.:.:.:.:.	0/1:89,0,255:.:.:.:.:.	0/1:61,0,204:.:.:.:.:.	0/1:100,0,255:.:.:.:.:.	19	16	25	13	26	7	10	8	3	9	CACTIG010000012.1	5426506	5439577	NC_048345.1|8305264|8318179|1|XM_034904924.1|XP_034760815.1|low_density_lipoprotein_receptor_class_A_domain_containing_2|12916	0
CACTIG010000012.1	5428401	.	A	C	195.416	SNP	AC=20;AD=16,14;ADF=8,9;ADR=8,5;AN=30;BQBZ=-0.577782;DP=296;DP4=68,42,109,73;FS=0;MQ=25;MQ0F=0;MQBZ=-4.83378;MQSBZ=0.915854;RPBZ=0.342088;SCBZ=0.0480532;SGB=-0.686358;VDB=0.878675;SNP;TV	1/1:211,42,0:14:0:0,8:0,6:0,14	1/1:159,36,0:12:0:0,9:0,3:0,12	1/1:169,42,0:14:0:0,12:0,2:0,14	1/1:225,42,0:14:0:0,6:0,8:0,14	1/1:172,48,0:16:0:0,11:0,5:0,16	0/1:145,0,255:.:.:.:.:.	0/1:140,0,139:.:.:.:.:.	0/1:104,0,157:.:.:.:.:.	0/1:187,0,149:.:.:.:.:.	0/1:136,0,255:.:.:.:.:.	26	18	13	23	31	14	12	14	14	16	CACTIG010000012.1	5426506	5439577	NC_048345.1|8305264|8318179|1|XM_034904924.1|XP_034760815.1|low_density_lipoprotein_receptor_class_A_domain_containing_2|12916	0
CACTIG010000012.1	5429642	.	G	T	182.416	SNP	AC=20;AD=5,26;ADF=1,1;ADR=4,25;AN=30;BQBZ=-0.0921168;DP=304;DP4=30,42,16,214;FS=0;MQ=28;MQ0F=0;MQBZ=-1.47239;MQSBZ=1.67094;RPBZ=0.908694;SCBZ=0.618318;SGB=-0.688148;VDB=0.0709305;SNP;TV	1/1:151,45,0:15:0:0,0:0,15:0,15	1/1:184,42,0:14:0:0,2:0,12:0,14	1/1:152,30,0:10:0:0,0:0,10:0,10	1/1:212,42,0:14:0:0,2:0,12:0,14	1/1:175,57,0:19:0:0,0:0,19:0,19	0/1:116,0,213:.:.:.:.:.	0/1:182,0,89:.:.:.:.:.	0/1:179,0,139:.:.:.:.:.	0/1:131,0,111:.:.:.:.:.	0/1:155,0,56:.:.:.:.:.	19	22	23	20	31	15	14	10	14	19	CACTIG010000012.1	5426506	5439577	NC_048345.1|8305264|8318179|1|XM_034904924.1|XP_034760815.1|low_density_lipoprotein_receptor_class_A_domain_containing_2|12916	0
CACTIG010000012.1	5430161	.	G	T	225.417	SNP	AC=20;AD=16,29;ADF=7,14;ADR=9,15;AN=30;BQBZ=1.68683;DP=423;DP4=42,58,178,123;FS=0;MQ=30;MQ0F=0;MQBZ=-3.86159;MQSBZ=0.665879;RPBZ=0.527669;SCBZ=1.14018;SGB=-0.692067;VDB=0.993222;SNP;TV	1/1:255,60,0:20:0:0,12:0,8:0,20	1/1:255,69,0:23:0:0,10:0,13:0,23	1/1:255,51,0:17:0:0,12:0,5:0,17	1/1:255,66,0:22:0:0,17:0,5:0,22	1/1:236,39,0:13:0:0,10:0,3:0,13	0/1:161,0,255:.:.:.:.:.	0/1:225,0,161:.:.:.:.:.	0/1:255,0,142:.:.:.:.:.	0/1:255,0,101:.:.:.:.:.	0/1:255,0,243:.:.:.:.:.	26	25	31	33	46	24	25	18	24	14	CACTIG010000012.1	5426506	5439577	NC_048345.1|8305264|8318179|1|XM_034904924.1|XP_034760815.1|low_density_lipoprotein_receptor_class_A_domain_containing_2|12916	0
CACTIG010000012.1	5431402	.	G	A	228.385	SNP	AC=20;AD=33,23;ADF=20,15;ADR=13,8;AN=30;BQBZ=-0.414421;DP=525;DP4=114,75,171,147;FS=0;MQ=45;MQ0F=0;MQBZ=2.97245;MQSBZ=0;RPBZ=1.76866;SCBZ=0.3849;SGB=-0.693021;VDB=0.822705;SNP;TS	1/1:255,25,0:31:2:3,15:1,12:4,27	1/1:255,66,0:31:0:2,19:0,10:2,29	1/1:255,14,0:17:7:2,6:0,9:2,15	1/1:255,8,0:26:10:4,10:0,12:4,22	1/1:255,67,0:27:0:1,14:0,12:1,26	0/1:94,0,255:.:.:.:.:.	0/1:255,0,147:.:.:.:.:.	0/1:255,0,255:.:.:.:.:.	0/1:255,0,170:.:.:.:.:.	0/1:254,0,255:.:.:.:.:.	22	40	46	31	57	33	32	20	27	31	CACTIG010000012.1	5426506	5439577	NC_048345.1|8305264|8318179|1|XM_034904924.1|XP_034760815.1|low_density_lipoprotein_receptor_class_A_domain_containing_2|12916	0
CACTIG010000012.1	5433091	.	T	TCA,TTA	228.407	INS	AC=10,16;AD=8,29,26;ADF=2,17,11;ADR=6,12,15;AN=30;BQBZ=-1.70399;DP=425;DP4=25,24,181,151;FS=0;IDV=27;IMF=0.9;MQ=55;MQ0F=0;MQBZ=0.976497;MQSBZ=-0.491854;RPBZ=-0.933984;SCBZ=-2.68969;SGB=-0.692717;VDB=0.437074;INDEL;INS;TV	1/1:255,58,0,.,.,.:24:0:1,10,.:0,13,.:1,23,.	1/1:255,63,0,.,.,.:21:0:0,14,.:0,7,.:0,21,.	1/1:255,61,0,.,.,.:25:0:1,16,.:0,8,.:1,24,.	1/1:255,78,0,.,.,.:26:0:0,13,.:0,13,.:0,26,.	1/1:255,76,0,.,.,.:30:0:1,17,.:0,12,.:1,29,.	0/2:204,.,.,0,.,165:.:.:.:.:.	2/2:255,.,.,60,.,0:.:.:.:.:.	2/2:255,.,.,87,.,0:.:.:.:.:.	2/2:255,.,.,27,.,0:.:.:.:.:.	0/2:255,.,.,0,.,60:.:.:.:.:.	25	25	28	22	39	30	25	28	32	34	CACTIG010000012.1	5426506	5439577	NC_048345.1|8305264|8318179|1|XM_034904924.1|XP_034760815.1|low_density_lipoprotein_receptor_class_A_domain_containing_2|12916	0
CACTIG010000012.1	5434303	.	T	G	152.416	SNP	AC=20;AD=9,6;ADF=5,6;ADR=4,0;AN=30;BQBZ=0.189593;DP=293;DP4=54,48,181,3;FS=0;MQ=24;MQ0F=0;MQBZ=-4.58188;MQSBZ=-0.275321;RPBZ=0.464199;SCBZ=1.96666;SGB=-0.683931;VDB=0.986203;SNP;TV	1/1:160,39,0:13:0:0,12:0,1:0,13	1/1:131,33,0:11:0:0,11:0,0:0,11	1/1:172,60,0:20:0:0,20:0,0:0,20	1/1:182,63,0:21:0:0,21:0,0:0,21	1/1:141,36,0:12:0:0,12:0,0:0,12	0/1:121,0,239:.:.:.:.:.	0/1:136,0,116:.:.:.:.:.	0/1:83,0,209:.:.:.:.:.	0/1:90,0,227:.:.:.:.:.	0/1:108,0,199:.:.:.:.:.	24	26	19	24	15	13	12	20	21	12	CACTIG010000012.1	5426506	5439577	NC_048345.1|8305264|8318179|1|XM_034904924.1|XP_034760815.1|low_density_lipoprotein_receptor_class_A_domain_containing_2|12916	0
CACTIG010000012.1	5434311	.	T	C	173.416	SNP	AC=20;AD=4,10;ADF=1,10;ADR=3,0;AN=30;BQBZ=0.390436;DP=305;DP4=48,48,186,13;FS=0;MQ=30;MQ0F=0;MQBZ=-4.87715;MQSBZ=-0.74398;RPBZ=0.613434;SCBZ=1.84951;SGB=-0.680642;VDB=0.955033;SNP;TS	1/1:165,36,0:12:0:0,11:0,1:0,12	1/1:203,42,0:14:0:0,11:0,3:0,14	1/1:183,54,0:18:0:0,18:0,0:0,18	1/1:190,54,0:18:0:0,18:0,0:0,18	1/1:174,33,0:11:0:0,10:0,1:0,11	0/1:167,0,255:.:.:.:.:.	0/1:144,0,149:.:.:.:.:.	0/1:104,0,204:.:.:.:.:.	0/1:137,0,188:.:.:.:.:.	0/1:147,0,89:.:.:.:.:.	31	29	21	20	14	12	14	19	18	14	CACTIG010000012.1	5426506	5439577	NC_048345.1|8305264|8318179|1|XM_034904924.1|XP_034760815.1|low_density_lipoprotein_receptor_class_A_domain_containing_2|12916	0
CACTIG010000012.1	5434334	.	T	TACC	225.417	INS	AC=20;AD=7,14;ADF=5,11;ADR=2,3;AN=30;BQBZ=-1.80216;DP=417;DP4=69,49,135,61;FS=0;IDV=18;IMF=0.947368;MQ=50;MQ0F=0;MQBZ=1.74141;MQSBZ=0.62698;RPBZ=-1.65556;SCBZ=-2.38048;SGB=-0.689466;VDB=0.00192573;INDEL;INS;TV	1/1:255,48,0:16:0:0,9:0,7:0,16	1/1:255,48,0:16:0:0,7:0,9:0,16	1/1:221,54,0:18:0:0,17:0,1:0,18	1/1:208,34,0:19:7:1,16:1,1:2,17	1/1:177,27,0:9:0:0,6:0,3:0,9	0/1:132,0,255:.:.:.:.:.	0/1:255,0,112:.:.:.:.:.	0/1:178,0,159:.:.:.:.:.	0/1:209,0,169:.:.:.:.:.	0/1:235,0,108:.:.:.:.:.	36	36	28	34	25	19	22	25	27	15	CACTIG010000012.1	5426506	5439577	NC_048345.1|8305264|8318179|1|XM_034904924.1|XP_034760815.1|low_density_lipoprotein_receptor_class_A_domain_containing_2|12916	0
CACTIG010000012.1	5435643	.	G	A	225.417	SNP	AC=20;AD=14,19;ADF=10,9;ADR=4,10;AN=30;BQBZ=-0.217383;DP=422;DP4=46,34,141,177;FS=0;MQ=50;MQ0F=0;MQBZ=-2.94013;MQSBZ=-0.704154;RPBZ=-1.18685;SCBZ=-2.19089;SGB=-0.691153;VDB=0.000603183;SNP;TS	1/1:255,54,0:18:0:0,6:0,12:0,18	1/1:255,75,0:25:0:0,8:0,17:0,25	1/1:255,78,0:26:0:0,15:0,11:0,26	1/1:255,84,0:28:0:0,14:0,14:0,28	1/1:255,48,0:16:0:0,8:0,8:0,16	0/1:245,0,213:.:.:.:.:.	0/1:255,0,48:.:.:.:.:.	0/1:247,0,156:.:.:.:.:.	0/1:255,0,11:.:.:.:.:.	0/1:255,0,251:.:.:.:.:.	28	31	25	30	41	22	26	28	29	16	CACTIG010000012.1	5426506	5439577	NC_048345.1|8305264|8318179|1|XM_034904924.1|XP_034760815.1|low_density_lipoprotein_receptor_class_A_domain_containing_2|12916	0
CACTIG010000012.1	5550333	.	C	T	228.332	SNP	AC=20;AD=10,9;ADF=6,3;ADR=4,6;AN=30;BQBZ=0.585632;DP=249;DP4=41,38,78,86;FS=0;MQ=52;MQ0F=0;MQBZ=2.63447;MQSBZ=0.41825;RPBZ=-1.27943;SCBZ=-2.44949;SGB=-0.680642;VDB=0.323915;SNP;TS	1/1:230,0,5:14:0:1,4:1,8:2,12	1/1:255,47,0:21:0:1,15:0,5:1,20	1/1:162,2,0:10:0:1,2:1,6:2,8	1/1:255,22,0:23:0:1,7:1,14:2,21	1/1:157,15,0:5:0:0,2:0,3:0,5	0/1:173,0,108:.:.:.:.:.	0/1:186,0,210:.:.:.:.:.	0/1:211,0,50:.:.:.:.:.	0/1:226,0,104:.:.:.:.:.	0/1:172,0,142:.:.:.:.:.	12	24	14	18	19	15	23	11	23	5	CACTIG010000012.1	5440940	5647860	NC_048345.1|8319547|8527965|-1|XM_034904770.1|XP_034760661.1|basement_membrane-specific_heparan_sulfate_proteoglycan_core_protein|208419	0
CACTIG010000012.1	5839891	.	C	T	225.417	SNP	AC=20;AD=7,18;ADF=3,11;ADR=4,7;AN=30;BQBZ=-0.646831;DP=273;DP4=30,40,95,108;FS=0;MQ=34;MQ0F=0;MQBZ=-3.19836;MQSBZ=0.24222;RPBZ=0;SCBZ=0.661438;SGB=-0.689466;VDB=0.948769;SNP;TS	1/1:255,48,0:16:0:0,5:0,11:0,16	1/1:255,39,0:13:0:0,5:0,8:0,13	1/1:255,51,0:17:0:0,7:0,10:0,17	1/1:255,48,0:16:0:0,10:0,6:0,16	1/1:255,39,0:13:0:0,4:0,9:0,13	0/1:166,0,135:.:.:.:.:.	0/1:204,0,179:.:.:.:.:.	0/1:255,0,142:.:.:.:.:.	0/1:227,0,147:.:.:.:.:.	0/1:255,0,142:.:.:.:.:.	14	18	23	19	25	16	13	17	16	13	CACTIG010000012.1	5832889	5843819	NC_048345.1|8797420|8809895|-1|XM_034041631.2|XP_033897522.2|UTP3_small_subunit_processome_component|12476	0
CACTIG010000012.1	5839926	.	G	C	225.417	SNP	AC=20;AD=6,18;ADF=3,10;ADR=3,8;AN=30;BQBZ=-1.60275;DP=254;DP4=40,32,91,85;FS=0;MQ=39;MQ0F=0;MQBZ=-3.32131;MQSBZ=-1.00554;RPBZ=1.53343;SCBZ=0.83666;SGB=-0.686358;VDB=0.453798;SNP;TV	1/1:255,42,0:14:0:0,5:0,9:0,14	1/1:255,39,0:13:0:0,5:0,8:0,13	1/1:255,42,0:14:0:0,6:0,8:0,14	1/1:255,48,0:16:0:0,8:0,8:0,16	1/1:255,45,0:15:0:0,7:0,8:0,15	0/1:190,0,143:.:.:.:.:.	0/1:141,0,212:.:.:.:.:.	0/1:174,0,187:.:.:.:.:.	0/1:178,0,158:.:.:.:.:.	0/1:255,0,142:.:.:.:.:.	15	16	18	16	25	14	13	15	16	16	CACTIG010000012.1	5832889	5843819	NC_048345.1|8797420|8809895|-1|XM_034041631.2|XP_033897522.2|UTP3_small_subunit_processome_component|12476	0
CACTIG010000012.1	5840832	.	G	A	120.415	SNP	AC=18;AD=5,2;ADF=1,2;ADR=4,0;AN=26;BQBZ=-1.43318;DP=99;DP4=21,22,52,3;FS=0;MQ=48;MQ0F=0;MQBZ=-1;MQSBZ=1.73205;RPBZ=0;SCBZ=-1;SGB=-0.616816;VDB=0.670308;SNP;TS	1/1:125,18,0:6:0:0,6:0,0:0,6	1/1:138,24,0:8:0:0,8:0,0:0,8	1/1:141,12,0:4:0:0,3:0,1:0,4	1/1:128,21,0:7:0:0,7:0,0:0,7	1/1:150,24,0:8:0:0,8:0,0:0,8	./.:.:.:.:.:.:.	0/1:56,0,56:.:.:.:.:.	0/1:62,0,194:.:.:.:.:.	0/1:99,0,147:.:.:.:.:.	0/1:44,0,107:.:.:.:.:.	13	5	11	10	9	8	8	7	9	10	CACTIG010000012.1	5832889	5843819	NC_048345.1|8797420|8809895|-1|XM_034041631.2|XP_033897522.2|UTP3_small_subunit_processome_component|12476	0
CACTIG010000012.1	5841920	.	T	C	220.187	SNP	AC=20;AD=6,6;ADF=2,2;ADR=4,4;AN=30;BQBZ=1.6863;DP=242;DP4=24,49,58,101;FS=0;MQ=37;MQ0F=0;MQBZ=-0.800327;MQSBZ=2.15869;RPBZ=-0.976906;SCBZ=0.258199;SGB=-0.688148;VDB=0.368145;SNP;TS	1/1:247,23,0:16:0:0,8:1,7:1,15	1/1:101,24,0:8:0:0,2:0,6:0,8	1/1:211,54,0:18:0:0,6:0,12:0,18	1/1:166,21,0:7:0:0,3:0,4:0,7	1/1:83,12,0:4:0:0,2:0,2:0,4	0/1:161,0,104:.:.:.:.:.	0/1:228,0,188:.:.:.:.:.	0/1:133,0,159:.:.:.:.:.	0/1:213,0,172:.:.:.:.:.	0/1:79,0,135:.:.:.:.:.	18	25	16	22	12	16	8	19	7	4	CACTIG010000012.1	5832889	5843819	NC_048345.1|8797420|8809895|-1|XM_034041631.2|XP_033897522.2|UTP3_small_subunit_processome_component|12476	0
CACTIG010000012.1	5842101	.	A	C	163.416	SNP	AC=18;AD=8,9;ADF=6,4;ADR=2,5;AN=26;BQBZ=0.95983;DP=154;DP4=40,11,73,23;FS=0;MQ=53;MQ0F=0;MQBZ=-0.563301;MQSBZ=0.645497;RPBZ=-1.28682;SCBZ=0.995485;SGB=-0.670168;VDB=5.37284e-05;SNP;TV	1/1:193,30,0:10:0:0,9:0,1:0,10	1/1:73,12,0:4:0:0,2:0,2:0,4	1/1:90,9,0:3:0:0,2:0,1:0,3	1/1:105,12,0:4:0:0,2:0,2:0,4	1/1:178,27,0:9:0:0,6:0,3:0,9	0/1:97,0,131:.:.:.:.:.	0/1:193,0,70:.:.:.:.:.	0/1:127,0,142:.:.:.:.:.	./.:.:.:.:.:.:.	0/1:164,0,149:.:.:.:.:.	11	16	19	15	19	11	5	4	4	10	CACTIG010000012.1	5832889	5843819	NC_048345.1|8797420|8809895|-1|XM_034041631.2|XP_033897522.2|UTP3_small_subunit_processome_component|12476	0
CACTIG010000012.1	5842944	.	A	T	228.334	SNP	AC=18;AD=9,4;ADF=5,2;ADR=4,2;AN=26;BQBZ=-0.784465;DP=176;DP4=46,30,38,54;FS=0;MQ=57;MQ0F=0;MQBZ=2.23607;MQSBZ=1.1547;RPBZ=0.174608;SCBZ=-1.93649;SGB=-0.636426;VDB=0.0247636;SNP;TV	1/1:193,21,0:7:0:0,3:0,4:0,7	1/1:195,19,0:10:0:1,2:0,7:1,9	1/1:234,27,0:9:0:0,6:0,3:0,9	1/1:255,29,0:15:0:1,4:0,9:1,13	1/1:244,0,0:15:3:2,7:0,6:2,13	./.:.:.:.:.:.:.	0/1:105,0,204:.:.:.:.:.	0/1:162,0,76:.:.:.:.:.	0/1:66,0,217:.:.:.:.:.	0/1:92,0,179:.:.:.:.:.	11	15	13	17	15	7	11	11	20	15	CACTIG010000012.1	5832889	5843819	NC_048345.1|8797420|8809895|-1|XM_034041631.2|XP_033897522.2|UTP3_small_subunit_processome_component|12476	0
CACTIG010000012.1	5843609	.	C	T	225.417	SNP	AC=20;AD=9,11;ADF=3,6;ADR=6,5;AN=30;BQBZ=0;DP=199;DP4=28,30,61,62;FS=0;MQ=49;MQ0F=0;MQBZ=0.456435;MQSBZ=0.303138;RPBZ=1.49241;SCBZ=0.904534;SGB=-0.688148;VDB=0.95178;SNP;TS	1/1:255,45,0:15:0:0,9:0,6:0,15	1/1:221,30,0:10:0:0,5:0,5:0,10	1/1:255,33,0:11:0:0,6:0,5:0,11	1/1:255,33,0:11:0:0,4:0,7:0,11	1/1:255,36,0:12:0:0,5:0,7:0,12	0/1:146,0,107:.:.:.:.:.	0/1:52,0,188:.:.:.:.:.	0/1:45,0,177:.:.:.:.:.	0/1:162,0,15:.:.:.:.:.	0/1:188,0,189:.:.:.:.:.	11	13	10	11	21	17	11	12	13	13	CACTIG010000012.1	5832889	5843819	NC_048345.1|8797420|8809895|-1|XM_034041631.2|XP_033897522.2|UTP3_small_subunit_processome_component|12476	0
CACTIG010000012.1	5848923	.	A	G	225.417	SNP	AC=20;AD=8,7;ADF=2,2;ADR=6,5;AN=30;BQBZ=-1.13206;DP=295;DP4=54,44,99,82;FS=0;MQ=41;MQ0F=0;MQBZ=-4.33051;MQSBZ=-0.916515;RPBZ=0;SCBZ=-0.104828;SGB=-0.651104;VDB=0.380458;SNP;TS	1/1:207,24,0:8:0:0,3:0,5:0,8	1/1:255,57,0:19:0:0,9:0,10:0,19	1/1:255,57,0:19:0:0,8:0,11:0,19	1/1:255,66,0:22:0:0,13:0,9:0,22	1/1:255,45,0:15:0:0,8:0,7:0,15	0/1:158,0,246:.:.:.:.:.	0/1:213,0,180:.:.:.:.:.	0/1:191,0,191:.:.:.:.:.	0/1:87,0,186:.:.:.:.:.	0/1:151,0,166:.:.:.:.:.	27	25	23	16	15	8	20	21	22	15	CACTIG010000012.1	5832889	5843819	NC_048345.1|8797420|8809895|-1|XM_034041631.2|XP_033897522.2|UTP3_small_subunit_processome_component|12476	5104
CACTIG010000012.1	5853515	.	C	T	225.417	SNP	AC=20;AD=7,12;ADF=3,1;ADR=4,11;AN=30;BQBZ=-1.85197;DP=372;DP4=30,48,110,159;FS=0;MQ=51;MQ0F=0;MQBZ=-2.15257;MQSBZ=-1.60615;RPBZ=1.90327;SCBZ=0.928032;SGB=-0.692352;VDB=0.804106;SNP;TS	1/1:255,63,0:21:0:0,11:0,10:0,21	1/1:255,75,0:25:0:0,10:0,15:0,25	1/1:255,111,0:37:0:0,16:0,21:0,37	1/1:255,57,0:19:0:0,10:0,9:0,19	1/1:255,69,0:23:0:0,9:0,14:0,23	0/1:222,0,175:.:.:.:.:.	0/1:255,0,81:.:.:.:.:.	0/1:255,0,164:.:.:.:.:.	0/1:228,0,255:.:.:.:.:.	0/1:150,0,155:.:.:.:.:.	23	30	32	32	21	25	27	39	27	25	CACTIG010000012.1	5857251	5880751	NC_048345.1|9025177|9054712|-1|XM_034904778.1|XP_034760669.1|coiled-coil_domain-containing_protein_30-like|29536	3736
CACTIG010000012.1	6000186	.	C	A	111.415	SNP	AC=18;AD=10,4;ADF=4,0;ADR=6,4;AN=26;BQBZ=-0.62361;DP=99;DP4=11,34,6,48;FS=0;MQ=27;MQ0F=0;MQBZ=1.04787;MQSBZ=1.04787;RPBZ=-1;SCBZ=0.408248;SGB=-0.616816;VDB=0.241952;SNP;TV	1/1:110,10,0:7:0:0,1:1,5:1,6	1/1:110,12,0:4:0:0,0:0,4:0,4	1/1:87,12,0:4:0:0,1:0,3:0,4	1/1:76,5,0:4:0:0,0:1,3:1,3	1/1:141,21,0:7:0:0,0:0,7:0,7	./.:.:.:.:.:.:.	0/1:66,0,45:.:.:.:.:.	0/1:55,0,13:.:.:.:.:.	0/1:48,0,115:.:.:.:.:.	0/1:77,0,193:.:.:.:.:.	7	8	7	7	14	7	4	4	4	7	CACTIG010000012.1	5936008	5960403	NC_048345.1|9072391|9095222|-1|XM_034904874.1|XP_034760765.1|zinc_finger_protein_362-like,_transcript_variant_X2|22832	39783
CACTIG010000012.1	6030624	.	GC	G	193.416	DEL	AC=20;AD=6,8;ADF=6,8;ADR=0,0;AN=30;DP=229;DP4=49,4,131,20;FS=0;IDV=9;IMF=0.818182;MQ=57;MQ0F=0;MQBZ=2.43432;MQSBZ=-1.7129;RPBZ=-2.14585;SCBZ=-1.1812;SGB=-0.662043;VDB=0.00402302;DEL;INDEL;TV	1/1:209,27,0:9:0:0,7:0,2:0,9	1/1:184,24,0:8:0:0,7:0,1:0,8	1/1:214,33,0:11:0:0,9:0,2:0,11	1/1:223,39,0:13:0:0,12:0,1:0,13	1/1:199,2,0:13:0:1,10:0,2:1,12	0/1:129,0,144:.:.:.:.:.	0/1:185,0,60:.:.:.:.:.	0/1:196,0,35:.:.:.:.:.	0/1:177,0,115:.:.:.:.:.	0/1:133,0,113:.:.:.:.:.	26	23	36	27	28	21	16	24	21	18	CACTIG010000012.1	6044992	6049686	NC_048345.1|9281749|9286552|-1|XM_034042224.2|XP_033898115.2|small_vasohibin_binding_protein,_transcript_variant_X2|4804	14368
CACTIG010000012.1	6216798	.	G	A	159.281	SNP	AC=18;AD=6,2;ADF=5,1;ADR=1,1;AN=26;BQBZ=1.49924;DP=141;DP4=44,26,32,38;FS=0;MQ=33;MQ0F=0;MQBZ=0.707107;MQSBZ=-1.69706;RPBZ=-1.22225;SCBZ=-1.41421;SGB=-0.662043;VDB=0.792725;SNP;TS	1/1:172,3,0:10:0:0,5:1,4:1,9	1/1:79,5,0:9:3:0,2:3,4:3,6	1/1:153,0,4:9:0:1,4:1,3:2,7	1/1:118,24,0:8:0:0,1:0,7:0,8	1/1:186,16,0:9:0:0,5:1,3:1,8	0/1:53,0,132:.:.:.:.:.	0/1:60,0,122:.:.:.:.:.	0/1:120,0,104:.:.:.:.:.	0/1:36,0,97:.:.:.:.:.	./.:.:.:.:.:.:.	11	11	14	8	12	10	9	9	8	11	CACTIG010000012.1	6073224	6098569	NC_048345.1|9311956|9337688|-1|XM_034041700.2|XP_033897591.1|wingless-type_MMTV_integration_site_family,_member_4|25733	118229
CACTIG010000012.1	6216841	.	A	T	163.297	SNP	AC=17;AD=8,3;ADF=3,3;ADR=5,0;AN=24;BQBZ=-0.801784;DP=124;DP4=34,20,38,25;FS=0;MQ=34;MQ0F=0;MQBZ=1.95244;MQSBZ=-1.57181;RPBZ=-1.46385;SGB=-0.636426;VDB=0.271748;SNP;TV	1/1:142,21,0:7:0:0,6:0,1:0,7	1/1:146,10,0:9:4:0,4:2,3:2,7	1/1:70,0,3:6:0:1,2:1,2:2,4	1/1:119,24,0:8:0:0,1:0,7:0,8	1/1:190,19,0:10:0:0,7:1,2:1,9	./.:.:.:.:.:.:.	0/1:105,0,87:.:.:.:.:.	0/1:91,0,132:.:.:.:.:.	./.:.:.:.:.:.:.	0/1:48,0,146:.:.:.:.:.	8	11	14	15	12	7	10	7	8	12	CACTIG010000012.1	6073224	6098569	NC_048345.1|9311956|9337688|-1|XM_034041700.2|XP_033897591.1|wingless-type_MMTV_integration_site_family,_member_4|25733	118272
CACTIG010000012.1	6217354	.	G	C	225.417	SNP	AC=20;AD=14,12;ADF=7,9;ADR=7,3;AN=30;BQBZ=-0.539737;DP=308;DP4=38,53,119,83;FS=0;MQ=34;MQ0F=0;MQBZ=-1.60577;MQSBZ=0.321949;RPBZ=0;SCBZ=0.424918;SGB=-0.680642;VDB=0.999447;SNP;TV	1/1:213,36,0:12:0:0,6:0,6:0,12	1/1:255,63,0:21:0:0,12:0,9:0,21	1/1:153,2,0:13:0:0,8:1,4:1,12	1/1:255,60,0:20:0:0,15:0,5:0,20	1/1:227,39,0:13:0:0,10:0,3:0,13	0/1:189,0,174:.:.:.:.:.	0/1:180,0,194:.:.:.:.:.	0/1:169,0,193:.:.:.:.:.	0/1:199,0,124:.:.:.:.:.	0/1:147,0,255:.:.:.:.:.	22	22	25	17	28	15	24	14	23	14	CACTIG010000012.1	6073224	6098569	NC_048345.1|9311956|9337688|-1|XM_034041700.2|XP_033897591.1|wingless-type_MMTV_integration_site_family,_member_4|25733	118785
CACTIG010000012.1	6217400	.	G	A	167.416	SNP	AC=16;AD=14,8;ADF=7,7;ADR=7,1;AN=22;BQBZ=-2.74852;DP=188;DP4=32,28,94,30;FS=0;MQ=41;MQ0F=0;MQBZ=-2.2466;MQSBZ=-1.29801;RPBZ=-0.571093;SCBZ=-0.755929;SGB=-0.686358;VDB=0.00232008;SNP;TS	1/1:109,42,0:14:0:0,11:0,3:0,14	1/1:197,63,0:21:0:0,13:0,8:0,21	1/1:82,24,0:8:0:0,7:0,1:0,8	1/1:82,36,0:12:0:0,9:0,3:0,12	1/1:75,18,0:6:0:0,5:0,1:0,6	./.:.:.:.:.:.:.	0/1:59,0,188:.:.:.:.:.	./.:.:.:.:.:.:.	0/1:65,0,139:.:.:.:.:.	0/1:54,0,255:.:.:.:.:.	16	21	18	20	23	14	21	8	13	6	CACTIG010000012.1	6073224	6098569	NC_048345.1|9311956|9337688|-1|XM_034041700.2|XP_033897591.1|wingless-type_MMTV_integration_site_family,_member_4|25733	118831
CACTIG010000012.1	6218642	.	G	A	155.416	SNP	AC=16;AD=10,6;ADF=4,2;ADR=6,4;AN=22;BQBZ=1.91953;DP=121;DP4=19,26,31,39;FS=0;MQ=42;MQ0F=0;MQBZ=1.75683;MQSBZ=2.06232;RPBZ=-0.523823;SCBZ=1.73205;SGB=-0.651104;VDB=0.0392011;SNP;TS	1/1:151,24,0:8:0:0,2:0,6:0,8	1/1:130,15,0:5:0:0,2:0,3:0,5	1/1:173,4,0:10:0:1,5:1,3:2,8	1/1:185,21,0:7:0:0,3:0,4:0,7	1/1:183,18,0:6:0:0,3:0,3:0,6	0/1:48,0,217:.:.:.:.:.	0/1:150,0,16:.:.:.:.:.	./.:.:.:.:.:.:.	0/1:135,0,241:.:.:.:.:.	./.:.:.:.:.:.:.	14	11	14	18	14	8	5	10	7	6	CACTIG010000012.1	6073224	6098569	NC_048345.1|9311956|9337688|-1|XM_034041700.2|XP_033897591.1|wingless-type_MMTV_integration_site_family,_member_4|25733	120073
CACTIG010000012.1	6219812	.	G	A	144.416	SNP	AC=16;AD=3,3;ADF=1,1;ADR=2,2;AN=22;BQBZ=-0.512348;DP=77;DP4=11,13,26,22;FS=0;MQ=39;MQ0F=0;MQBZ=-0.150878;MQSBZ=-1.36626;RPBZ=1.0435;SCBZ=-1.53704;SGB=-0.651104;VDB=0.00261765;SNP;TS	1/1:174,24,0:8:0:0,6:0,2:0,8	1/1:152,24,0:8:0:0,3:0,5:0,8	1/1:102,12,0:4:0:0,3:0,1:0,4	1/1:74,9,0:3:0:0,1:0,2:0,3	1/1:63,6,0:2:0:0,1:0,1:0,2	./.:.:.:.:.:.:.	0/1:60,0,48:.:.:.:.:.	0/1:56,0,136:.:.:.:.:.	0/1:65,0,87:.:.:.:.:.	./.:.:.:.:.:.:.	5	6	11	7	10	10	8	6	5	2	CACTIG010000012.1	6073224	6098569	NC_048345.1|9311956|9337688|-1|XM_034041700.2|XP_033897591.1|wingless-type_MMTV_integration_site_family,_member_4|25733	121243
CACTIG010000012.1	6220199	.	A	G	225.417	SNP	AC=20;AD=5,5;ADF=4,3;ADR=1,2;AN=30;BQBZ=1.05761;DP=247;DP4=46,36,90,67;FS=0;MQ=34;MQ0F=0;MQBZ=-2.46194;MQSBZ=-0.412011;RPBZ=1.32232;SCBZ=-0.124838;SGB=-0.676189;VDB=0.304945;SNP;TS	1/1:223,33,0:11:0:0,8:0,3:0,11	1/1:255,60,0:20:0:0,15:0,5:0,20	1/1:196,33,0:11:0:0,6:0,5:0,11	1/1:255,51,0:17:0:0,12:0,5:0,17	1/1:255,66,0:22:0:0,13:0,9:0,22	0/1:104,0,216:.:.:.:.:.	0/1:139,0,81:.:.:.:.:.	0/1:122,0,190:.:.:.:.:.	0/1:147,0,199:.:.:.:.:.	0/1:119,0,123:.:.:.:.:.	19	16	17	24	12	14	20	11	20	24	CACTIG010000012.1	6073224	6098569	NC_048345.1|9311956|9337688|-1|XM_034041700.2|XP_033897591.1|wingless-type_MMTV_integration_site_family,_member_4|25733	121630
CACTIG010000012.1	6220318	.	T	A	225.417	SNP	AC=20;AD=5,18;ADF=3,10;ADR=2,8;AN=30;BQBZ=0.124847;DP=342;DP4=34,28,125,141;FS=0;MQ=52;MQ0F=0;MQBZ=-0.816497;MQSBZ=1.11747;RPBZ=0.235913;SCBZ=-1.73205;SGB=-0.69168;VDB=0.804248;SNP;TV	1/1:255,57,0:19:0:0,12:0,7:0,19	1/1:255,75,0:25:0:0,9:0,16:0,25	1/1:255,42,0:14:0:0,6:0,8:0,14	1/1:255,63,0:21:0:0,12:0,9:0,21	1/1:255,81,0:27:0:0,10:0,17:0,27	0/1:220,0,137:.:.:.:.:.	0/1:255,0,85:.:.:.:.:.	0/1:245,0,117:.:.:.:.:.	0/1:255,0,189:.:.:.:.:.	0/1:255,0,97:.:.:.:.:.	16	21	21	34	24	20	27	15	21	30	CACTIG010000012.1	6073224	6098569	NC_048345.1|9311956|9337688|-1|XM_034041700.2|XP_033897591.1|wingless-type_MMTV_integration_site_family,_member_4|25733	121749
CACTIG010000012.1	6220337	.	T	A	225.417	SNP	AC=20;AD=9,9;ADF=6,6;ADR=3,3;AN=30;BQBZ=1.15316;DP=286;DP4=38,30,97,110;FS=0;MQ=47;MQ0F=0;MQBZ=-0.816497;MQSBZ=0.615289;RPBZ=0.852803;SCBZ=-1.20605;SGB=-0.690438;VDB=0.635363;SNP;TV	1/1:255,51,0:17:0:0,10:0,7:0,17	1/1:255,69,0:23:0:0,9:0,14:0,23	1/1:255,45,0:15:0:0,5:0,10:0,15	1/1:255,63,0:21:0:0,11:0,10:0,21	1/1:255,63,0:21:0:0,6:0,15:0,21	0/1:171,0,107:.:.:.:.:.	0/1:250,0,46:.:.:.:.:.	0/1:211,0,144:.:.:.:.:.	0/1:213,0,206:.:.:.:.:.	0/1:156,0,184:.:.:.:.:.	11	16	19	28	18	19	24	17	22	23	CACTIG010000012.1	6073224	6098569	NC_048345.1|9311956|9337688|-1|XM_034041700.2|XP_033897591.1|wingless-type_MMTV_integration_site_family,_member_4|25733	121768
CACTIG010000012.1	6220546	.	T	G	225.417	SNP	AC=20;AD=14,10;ADF=6,6;ADR=8,4;AN=30;BQBZ=0.0882214;DP=285;DP4=48,38,136,63;FS=0;MQ=35;MQ0F=0;MQBZ=-2.80724;MQSBZ=0.583938;RPBZ=-1.9566;SGB=-0.686358;VDB=0.26488;SNP;TV	1/1:255,42,0:14:0:0,10:0,4:0,14	1/1:255,81,0:27:0:0,20:0,7:0,27	1/1:248,36,0:12:0:0,8:0,4:0,12	1/1:255,63,0:21:0:0,13:0,8:0,21	1/1:248,51,0:17:0:0,11:0,6:0,17	0/1:135,0,87:.:.:.:.:.	0/1:113,0,64:.:.:.:.:.	0/1:188,0,211:.:.:.:.:.	0/1:131,0,201:.:.:.:.:.	0/1:144,0,246:.:.:.:.:.	11	15	24	16	24	14	27	12	21	17	CACTIG010000012.1	6073224	6098569	NC_048345.1|9311956|9337688|-1|XM_034041700.2|XP_033897591.1|wingless-type_MMTV_integration_site_family,_member_4|25733	121977
CACTIG010000012.1	6245734	.	T	C	228.269	SNP	AC=20;AD=8,32;ADF=5,4;ADR=3,28;AN=30;BQBZ=-0.610396;DP=616;DP4=26,63,124,381;FS=0;MQ=34;MQ0F=0;MQBZ=-0.981557;MQSBZ=1.36605;RPBZ=-1.64552;SGB=-0.692717;VDB=0.00263927;SNP;TS	1/1:255,69,0:23:0:0,8:0,15:0,23	1/1:255,114,0:38:0:0,6:0,32:0,38	1/1:255,111,0:37:0:0,12:0,25:0,37	1/1:255,80,0:39:0:0,10:1,28:1,38	1/1:255,117,0:39:0:0,8:0,31:0,39	0/1:198,0,171:.:.:.:.:.	0/1:255,0,184:.:.:.:.:.	0/1:243,0,60:.:.:.:.:.	0/1:206,0,97:.:.:.:.:.	0/1:209,0,109:.:.:.:.:.	29	55	40	48	42	25	39	39	39	40	CACTIG010000012.1	6073224	6098569	NC_048345.1|9311956|9337688|-1|XM_034041700.2|XP_033897591.1|wingless-type_MMTV_integration_site_family,_member_4|25733	147165
CACTIG010000012.1	6839536	.	C	T	225.417	SNP	AC=14;AD=2,4;ADF=2,2;ADR=0,2;AN=18;BQBZ=-1.20268;DP=71;DP4=9,0,32,29;FS=0;MQ=56;MQ0F=0;MQBZ=1.85164;MQSBZ=-1.96214;RPBZ=0.777844;SCBZ=-2.82843;SGB=-0.676189;VDB=0.659762;SNP;TS	1/1:255,33,0:11:0:0,7:0,4:0,11	1/1:186,21,0:7:0:0,3:0,4:0,7	1/1:215,24,0:8:0:0,5:0,3:0,8	1/1:188,16,0:9:0:1,2:0,6:1,8	1/1:255,33,0:11:0:0,5:0,6:0,11	0/1:110,0,51:.:.:.:.:.	./.:.:.:.:.:.:.	./.:.:.:.:.:.:.	0/1:100,0,50:.:.:.:.:.	./.:.:.:.:.:.:.	8	5	7	10	8	11	10	8	10	12	CACTIG010000012.1	7041008	7062934	NC_048345.1|10931828|10953862|1|XM_034043169.2|XP_033899060.2|zinc_finger_and_BTB_domain-containing_protein_40-like,_transcript_variant_X2|22035	201472
CACTIG010000012.1	7039355	.	A	G	192.559	SNP	AC=16;AD=4,12;ADF=3,5;ADR=1,7;AN=22;BQBZ=0.981694;DP=137;DP4=32,18,33,52;FS=0;MQ=40;MQ0F=0;MQBZ=2.12132;MQSBZ=1.32583;RPBZ=-1.30956;SGB=-0.651104;VDB=0.0069841;SNP;TS	1/1:175,8,0:10:4:1,1:1,7:2,8	1/1:128,11,0:9:0:0,2:2,5:2,7	1/1:219,6,0:11:0:1,4:0,6:1,10	1/1:186,21,0:7:0:0,4:0,3:0,7	1/1:156,15,0:8:0:0,4:1,3:1,7	0/1:154,0,32:.:.:.:.:.	./.:.:.:.:.:.:.	0/1:60,0,186:.:.:.:.:.	./.:.:.:.:.:.:.	0/1:227,0,51:.:.:.:.:.	10	17	19	18	16	10	9	13	7	8	CACTIG010000012.1	7041008	7062934	NC_048345.1|10931828|10953862|1|XM_034043169.2|XP_033899060.2|zinc_finger_and_BTB_domain-containing_protein_40-like,_transcript_variant_X2|22035	1653
CACTIG010000012.1	7067119	.	C	A	228.371	SNP	AC=20;AD=13,6;ADF=7,2;ADR=6,4;AN=30;BQBZ=1.70369;DP=359;DP4=34,49,135,129;FS=0;MQ=59;MQ0F=0;MQBZ=4.47214;MQSBZ=1.98001;RPBZ=1.65198;SCBZ=-4.47214;SGB=-0.692717;VDB=0.763471;SNP;TV	1/1:255,69,0:23:0:0,8:0,15:0,23	1/1:255,51,0:17:0:0,9:0,8:0,17	1/1:255,75,0:25:0:0,15:0,10:0,25	1/1:255,50,0:21:0:0,13:1,7:1,20	1/1:255,93,0:31:0:0,16:0,15:0,31	0/1:170,0,206:.:.:.:.:.	0/1:230,0,58:.:.:.:.:.	0/1:255,0,63:.:.:.:.:.	0/1:255,0,175:.:.:.:.:.	0/1:82,0,255:.:.:.:.:.	18	22	31	28	20	23	17	31	21	35	CACTIG010000012.1	7067800	7079694	NC_048345.1|10914995|10927409|1|XM_034904782.1|XP_034760673.1|transmembrane_protein_269-like|12415	681
CACTIG010000012.1	7069500	.	G	A	187.416	SNP	AC=20;AD=7,7;ADF=5,3;ADR=2,4;AN=30;BQBZ=-0.68313;DP=125;DP4=22,18,27,54;FS=0;MQ=40;MQ0F=0;MQBZ=-0.881917;MQSBZ=-1.11144;RPBZ=0.503003;SCBZ=-1.34134;SGB=-0.636426;VDB=0.219617;SNP;TS	1/1:141,21,0:7:0:0,3:0,4:0,7	1/1:129,15,0:5:0:0,4:0,1:0,5	1/1:74,6,0:2:0:0,1:0,1:0,2	1/1:217,27,0:9:0:0,2:0,7:0,9	1/1:128,12,0:4:0:0,3:0,1:0,4	0/1:91,0,44:.:.:.:.:.	0/1:63,0,61:.:.:.:.:.	0/1:138,0,91:.:.:.:.:.	0/1:40,0,100:.:.:.:.:.	0/1:90,0,187:.:.:.:.:.	9	6	12	9	16	8	8	2	10	5	CACTIG010000012.1	7067800	7079694	NC_048345.1|10914995|10927409|1|XM_034904782.1|XP_034760673.1|transmembrane_protein_269-like|12415	0
CACTIG010000012.1	7070271	.	G	A	135.416	SNP	AC=16;AD=9,4;ADF=2,0;ADR=7,4;AN=22;BQBZ=-0.288675;DP=88;DP4=8,30,1,46;FS=0;MQ=60;MQ0F=0;MQBZ=-1;MQSBZ=-0.426401;RPBZ=1.1547;SCBZ=1;SGB=-0.511536;VDB=0.0506481;SNP;TS	1/1:64,9,0:3:0:0,0:0,3:0,3	1/1:131,18,0:6:0:0,0:0,6:0,6	1/1:165,15,0:5:0:0,1:0,4:0,5	1/1:134,21,0:7:0:0,0:0,7:0,7	1/1:80,9,0:3:0:0,0:0,3:0,3	0/1:54,0,82:.:.:.:.:.	0/1:71,0,142:.:.:.:.:.	./.:.:.:.:.:.:.	0/1:72,0,178:.:.:.:.:.	./.:.:.:.:.:.:.	8	11	10	14	12	6	7	7	12	5	CACTIG010000012.1	7067800	7079694	NC_048345.1|10914995|10927409|1|XM_034904782.1|XP_034760673.1|transmembrane_protein_269-like|12415	0
CACTIG010000012.1	7070288	.	GAA	G	132.416	DEL	AC=14;AD=9,3;ADF=2,0;ADR=7,3;AN=18;DP=61;DP4=12,20,0,25;FS=0;IDV=3;IMF=1;MQ=60;MQ0F=0;MQBZ=1.41421;MQSBZ=1.69031;RPBZ=-1.41421;SCBZ=1.41421;SGB=-0.511536;VDB=0.0312982;DEL;INDEL;TV	1/1:112,9,0:3:0:0,0:0,3:0,3	1/1:162,12,0:4:0:0,0:0,4:0,4	1/1:114,9,0:3:0:0,0:0,3:0,3	1/1:133,9,0:3:0:0,0:0,3:0,3	1/1:98,6,0:2:0:0,0:0,2:0,2	./.:.:.:.:.:.:.	0/1:47,0,255:.:.:.:.:.	./.:.:.:.:.:.:.	0/1:52,0,255:.:.:.:.:.	./.:.:.:.:.:.:.	6	9	11	13	12	5	5	4	7	5	CACTIG010000012.1	7067800	7079694	NC_048345.1|10914995|10927409|1|XM_034904782.1|XP_034760673.1|transmembrane_protein_269-like|12415	0
CACTIG010000012.1	7071094	.	A	G	222.221	SNP	AC=20;AD=8,12;ADF=2,6;ADR=6,6;AN=30;BQBZ=0.360041;DP=166;DP4=20,26,44,65;FS=0;MQ=36;MQ0F=0;MQBZ=-1.48192;MQSBZ=0.83666;RPBZ=0.356753;SCBZ=0.745356;SGB=-0.636426;VDB=0.311328;SNP;TS	1/1:123,28,16:7:0:0,2:0,2:0,4	1/1:70,6,0:2:0:0,1:0,1:0,2	1/1:183,18,0:6:0:0,3:0,3:0,6	1/1:105,12,0:4:0:0,3:0,1:0,4	1/1:152,18,0:6:0:0,2:0,4:0,6	0/1:104,0,84:.:.:.:.:.	0/1:144,0,73:.:.:.:.:.	0/1:138,0,135:.:.:.:.:.	0/1:174,0,98:.:.:.:.:.	0/1:255,0,165:.:.:.:.:.	8	12	17	14	24	7	2	7	5	6	CACTIG010000012.1	7067800	7079694	NC_048345.1|10914995|10927409|1|XM_034904782.1|XP_034760673.1|transmembrane_protein_269-like|12415	0
CACTIG010000012.1	7072657	.	A	C	225.417	SNP	AC=17;AD=8,5;ADF=4,2;ADR=4,3;AN=24;BQBZ=-0.0874218;DP=148;DP4=33,22,38,51;FS=0;MQ=35;MQ0F=0;MQBZ=-1.20578;MQSBZ=-0.727372;RPBZ=0.643742;SCBZ=1.19523;SGB=-0.686358;VDB=0.788754;SNP;TV	1/1:251,42,0:14:0:0,4:0,10:0,14	1/1:255,36,0:12:0:0,6:0,6:0,12	1/1:155,21,0:7:0:0,4:0,3:0,7	1/1:89,15,0:5:0:0,5:0,0:0,5	1/1:167,36,0:12:0:0,0:0,12:0,12	0/1:123,0,128:.:.:.:.:.	./.:.:.:.:.:.:.	0/1:110,0,158:.:.:.:.:.	0/1:107,0,162:.:.:.:.:.	./.:.:.:.:.:.:.	11	8	18	14	13	15	12	8	5	12	CACTIG010000012.1	7067800	7079694	NC_048345.1|10914995|10927409|1|XM_034904782.1|XP_034760673.1|transmembrane_protein_269-like|12415	0
CACTIG010000012.1	7083736	.	T	A	228.302	SNP	AC=20;AD=11,14;ADF=4,4;ADR=7,10;AN=30;BQBZ=-1.34727;DP=341;DP4=38,55,115,127;FS=0;MQ=43;MQ0F=0;MQBZ=1.4238;MQSBZ=-0.758964;RPBZ=-0.178532;SCBZ=0.821539;SGB=-0.692976;VDB=0.0572873;SNP;TV	1/1:255,34,0:28:3:0,13:2,13:2,26	1/1:255,66,0:22:0:0,10:0,12:0,22	1/1:255,36,0:18:0:1,8:0,9:1,17	1/1:255,20,0:20:2:3,9:1,7:4,16	1/1:255,2,0:25:6:0,9:4,12:4,21	0/1:228,0,157:.:.:.:.:.	0/1:239,0,45:.:.:.:.:.	0/1:255,0,124:.:.:.:.:.	0/1:233,0,174:.:.:.:.:.	0/1:228,0,185:.:.:.:.:.	19	19	23	28	26	28	25	19	21	28	CACTIG010000012.1	7077102	7104121	NW_023261190.1|3950|31339|-1|XM_034916847.1|XP_034772738.1|transmembrane_protein_269-like,_transcript_variant_X2|27390	0
CACTIG010000012.1	7092903	.	T	C	193.416	SNP	AC=18;AD=5,11;ADF=0,4;ADR=5,7;AN=26;BQBZ=-1.32288;DP=140;DP4=6,24,39,68;FS=0;MQ=26;MQ0F=0;MQBZ=0.180021;MQSBZ=2.29129;RPBZ=1.06066;SCBZ=0.701646;SGB=-0.636426;VDB=0.585123;SNP;TS	1/1:128,21,0:7:0:0,4:0,3:0,7	1/1:223,42,0:14:0:0,6:0,8:0,14	1/1:130,21,0:7:0:0,2:0,5:0,7	1/1:138,24,0:8:0:0,2:0,6:0,8	1/1:163,24,0:8:0:0,5:0,3:0,8	0/1:68,0,56:.:.:.:.:.	0/1:72,0,85:.:.:.:.:.	0/1:116,0,61:.:.:.:.:.	0/1:132,0,67:.:.:.:.:.	./.:.:.:.:.:.:.	7	8	14	16	18	7	14	7	9	8	CACTIG010000012.1	7077102	7104121	NW_023261190.1|3950|31339|-1|XM_034916847.1|XP_034772738.1|transmembrane_protein_269-like,_transcript_variant_X2|27390	0
CACTIG010000012.1	7132203	.	C	T	97.4152	SNP	AC=20;AD=1,4;ADF=0,3;ADR=1,1;AN=30;BQBZ=1.58114;DP=83;DP4=7,19,40,14;FS=0;MQ=33;MQ0F=0;MQBZ=2;MQSBZ=-2;RPBZ=-1.45095;SCBZ=1.41421;SGB=-0.590765;VDB=0.0224626;SNP;TS	1/1:122,15,0:5:0:0,4:0,1:0,5	1/1:127,15,0:5:0:0,5:0,0:0,5	1/1:102,9,0:3:0:0,2:0,1:0,3	1/1:104,5,0:5:0:0,4:1,0:1,4	1/1:118,12,0:4:0:0,1:0,3:0,4	0/1:73,0,52:.:.:.:.:.	0/1:90,0,54:.:.:.:.:.	0/1:59,0,9:.:.:.:.:.	0/1:70,0,21:.:.:.:.:.	0/1:78,0,17:.:.:.:.:.	8	5	8	9	6	6	6	7	6	6	CACTIG010000012.1	7077102	7112229	NW_023261190.1|3949|39478|-1|XM_034916846.1|XP_034772737.1|transmembrane_protein_269-like,_transcript_variant_X1|35530	19974
CACTIG010000012.1	7132249	.	C	G,A	169.332	SNP	AC=16,2;AD=4,2,2;ADF=3,2,2;ADR=1,0,0;AN=26;BQBZ=0.203186;DP=75;DP4=8,12,46,1;FS=0;MQ=46;MQ0F=0;MQBZ=1.64833;MQSBZ=-1.24602;RPBZ=-1.16677;SCBZ=0.353553;SGB=-0.651104;VDB=0.424295;SNP;TV	1/1:196,17,0,.,.,.:9:0:0,7,.:1,1,.:1,8,.	1/1:128,15,0,.,.,.:5:0:0,5,.:0,0,.:0,5,.	1/1:68,6,0,.,.,.:2:0:0,2,.:0,0,.:0,2,.	1/1:140,18,0,.,.,.:6:0:0,6,.:0,0,.:0,6,.	1/1:114,12,0,.,.,.:4:0:0,4,.:0,0,.:0,4,.	./.:.:.:.:.:.:.	0/1:77,0,25,.,.,.:.:.:.:.:.	0/1:101,0,22,.,.,.:.:.:.:.:.	0/1:51,0,33,.,.,.:.:.:.:.:.	0/2:48,.,.,0,.,109:.:.:.:.:.	8	15	13	12	12	10	12	9	13	11	CACTIG010000012.1	7077102	7112229	NW_023261190.1|3949|39478|-1|XM_034916846.1|XP_034772737.1|transmembrane_protein_269-like,_transcript_variant_X1|35530	20020
CACTIG010000012.1	7151563	.	G	A	222.417	SNP	AC=18;AD=6,2;ADF=5,1;ADR=1,1;AN=26;BQBZ=0.297044;DP=147;DP4=14,27,34,70;FS=0;MQ=52;MQ0F=0;MQBZ=1.58114;MQSBZ=0.632456;RPBZ=1.46385;SCBZ=0.69282;SGB=-0.590765;VDB=0.0207102;SNP;TS	1/1:126,0,3:6:0:0,1:1,4:1,5	1/1:252,42,0:14:0:0,4:0,10:0,14	1/1:176,21,0:7:0:0,2:0,5:0,7	1/1:223,0,1:12:0:0,5:1,6:1,11	1/1:203,0,5:11:0:0,4:1,6:1,10	./.:.:.:.:.:.:.	0/1:88,0,30:.:.:.:.:.	0/1:225,0,18:.:.:.:.:.	0/1:106,0,59:.:.:.:.:.	0/1:50,0,137:.:.:.:.:.	12	7	18	15	8	6	14	7	15	11	CACTIG010000012.1	7077102	7112229	NW_023261190.1|3949|39478|-1|XM_034916846.1|XP_034772737.1|transmembrane_protein_269-like,_transcript_variant_X1|35530	39334
CACTIG010000012.1	10260841	.	C	G	225.417	SNP	AC=20;AD=6,18;ADF=2,8;ADR=4,10;AN=30;BQBZ=-0.471089;DP=385;DP4=24,28,98,218;FS=0;MQ=60;MQ0F=0;RPBZ=0.318633;SGB=-0.689466;VDB=0.514454;SNP;TV	1/1:255,48,0:16:0:0,4:0,12:0,16	1/1:255,99,0:33:0:0,7:0,26:0,33	1/1:253,57,0:19:0:0,2:0,17:0,19	1/1:255,81,0:27:0:0,8:0,19:0,27	1/1:255,87,0:29:0:0,9:0,20:0,29	0/1:247,0,116:.:.:.:.:.	0/1:255,0,186:.:.:.:.:.	0/1:255,0,77:.:.:.:.:.	0/1:255,0,44:.:.:.:.:.	0/1:255,0,111:.:.:.:.:.	27	32	33	24	27	22	40	22	32	31	CACTIG010000012.1	10238041	10261798	NC_048344.1|18371010|18393119|1|XM_034042559.2|XP_033898450.2|leucine_rich_repeat_containing_23|22110	0
CACTIG010000012.1	10260849	.	T	G	225.417	SNP	AC=20;AD=5,16;ADF=3,6;ADR=2,10;AN=30;BQBZ=-0.892944;DP=369;DP4=24,26,81,219;FS=0;MQ=60;MQ0F=0;RPBZ=1.52944;SGB=-0.689466;VDB=0.472012;SNP;TV	1/1:255,48,0:16:0:0,5:0,11:0,16	1/1:255,99,0:33:0:0,6:0,27:0,33	1/1:255,57,0:19:0:0,2:0,17:0,19	1/1:255,81,0:27:0:0,8:0,19:0,27	1/1:255,69,0:23:0:0,6:0,17:0,23	0/1:235,0,111:.:.:.:.:.	0/1:255,0,206:.:.:.:.:.	0/1:240,0,62:.:.:.:.:.	0/1:255,0,13:.:.:.:.:.	0/1:255,0,70:.:.:.:.:.	27	36	30	22	25	22	38	23	36	27	CACTIG010000012.1	10238041	10261798	NC_048344.1|18371010|18393119|1|XM_034042559.2|XP_033898450.2|leucine_rich_repeat_containing_23|22110	0
CACTIG010000012.1	10262423	.	A	G	225.417	SNP	AC=20;AD=5,16;ADF=1,6;ADR=4,10;AN=30;BQBZ=-0.0827894;DP=375;DP4=22,26,116,175;FS=0;MQ=48;MQ0F=0;MQBZ=-2.48447;MQSBZ=-0.725597;RPBZ=-1.01994;SCBZ=-1.84391;SGB=-0.691153;VDB=0.475741;SNP;TS	1/1:255,54,0:18:0:0,4:0,14:0,18	1/1:255,63,0:21:0:0,9:0,12:0,21	1/1:255,60,0:20:0:0,5:0,15:0,20	1/1:255,60,0:20:0:0,11:0,9:0,20	1/1:255,42,0:14:0:0,7:0,7:0,14	0/1:255,0,123:.:.:.:.:.	0/1:255,0,55:.:.:.:.:.	0/1:255,0,110:.:.:.:.:.	0/1:255,0,83:.:.:.:.:.	0/1:255,0,120:.:.:.:.:.	26	30	27	30	25	21	25	20	22	15	CACTIG010000012.1	10238041	10261798	NC_048344.1|18371010|18393119|1|XM_034042559.2|XP_033898450.2|leucine_rich_repeat_containing_23|22110	625
CACTIG010000012.1	10262765	.	C	A	225.417	SNP	AC=20;AD=8,6;ADF=4,4;ADR=4,2;AN=30;BQBZ=1.13691;DP=277;DP4=40,26,77,113;FS=0;MQ=55;MQ0F=0;MQBZ=-0.813988;MQSBZ=-0.308607;RPBZ=-0.390264;SCBZ=0.632456;SGB=-0.662043;VDB=0.251355;SNP;TV	1/1:231,27,0:9:0:0,3:0,6:0,9	1/1:255,51,0:17:0:0,9:0,8:0,17	1/1:255,51,0:17:0:0,6:0,11:0,17	1/1:255,60,0:20:0:0,7:0,13:0,20	1/1:255,36,0:12:0:0,3:0,9:0,12	0/1:243,0,118:.:.:.:.:.	0/1:246,0,85:.:.:.:.:.	0/1:255,0,239:.:.:.:.:.	0/1:203,0,88:.:.:.:.:.	0/1:117,0,179:.:.:.:.:.	23	17	30	14	15	10	18	18	23	13	CACTIG010000012.1	10238041	10261798	NC_048344.1|18371010|18393119|1|XM_034042559.2|XP_033898450.2|leucine_rich_repeat_containing_23|22110	967
CACTIG010000012.1	10262845	.	C	T	225.417	SNP	AC=20;AD=7,7;ADF=2,3;ADR=5,4;AN=30;BQBZ=0.832764;DP=291;DP4=29,48,99,113;FS=0;MQ=34;MQ0F=0;MQBZ=-1.66035;MQSBZ=4.02277;RPBZ=-0.0353052;SCBZ=0.512989;SGB=-0.691153;VDB=0.565387;SNP;TS	1/1:255,54,0:18:0:0,7:0,11:0,18	1/1:241,45,0:15:0:0,5:0,10:0,15	1/1:255,66,0:22:0:0,11:0,11:0,22	1/1:255,54,0:18:0:0,7:0,11:0,18	1/1:246,36,0:12:0:0,4:0,8:0,12	0/1:157,0,123:.:.:.:.:.	0/1:189,0,58:.:.:.:.:.	0/1:232,0,146:.:.:.:.:.	0/1:111,0,173:.:.:.:.:.	0/1:128,0,131:.:.:.:.:.	15	20	29	15	14	18	16	22	18	12	CACTIG010000012.1	10238041	10261798	NC_048344.1|18371010|18393119|1|XM_034042559.2|XP_033898450.2|leucine_rich_repeat_containing_23|22110	1047
CACTIG010000012.1	10262981	.	C	G	122.415	SNP	AC=20;AD=15,8;ADF=10,1;ADR=5,7;AN=30;BQBZ=-0.256337;DP=244;DP4=54,33,15,127;FS=0;MQ=26;MQ0F=0;MQBZ=-2.57494;MQSBZ=1.18688;RPBZ=-0.285102;SCBZ=1.57697;SGB=-0.662043;VDB=0.0151496;SNP;TV	1/1:104,27,0:9:0:0,0:0,9:0,9	1/1:122,27,0:9:0:0,1:0,8:0,9	1/1:152,39,0:13:0:0,1:0,12:0,13	1/1:149,30,0:10:0:0,3:0,7:0,10	1/1:90,12,0:4:0:0,1:0,3:0,4	0/1:58,0,138:.:.:.:.:.	0/1:79,0,91:.:.:.:.:.	0/1:96,0,91:.:.:.:.:.	0/1:66,0,145:.:.:.:.:.	0/1:76,0,221:.:.:.:.:.	16	17	15	19	26	10	11	15	12	6	CACTIG010000012.1	10238041	10261798	NC_048344.1|18371010|18393119|1|XM_034042559.2|XP_033898450.2|leucine_rich_repeat_containing_23|22110	1183
CACTIG010000012.1	10265141	.	T	C	225.417	SNP	AC=18;AD=8,2;ADF=2,2;ADR=6,0;AN=26;BQBZ=0.365518;DP=154;DP4=26,24,73,15;FS=0;MQ=49;MQ0F=0;MQBZ=-1.41421;MQSBZ=1.04978;RPBZ=0.595487;SCBZ=1;SGB=-0.662043;VDB=0.90234;SNP;TS	1/1:209,27,0:9:0:0,7:0,2:0,9	1/1:181,30,0:10:0:0,9:0,1:0,10	1/1:163,21,0:7:0:0,6:0,1:0,7	1/1:255,45,0:15:0:0,11:0,4:0,15	1/1:255,39,0:13:0:0,10:0,3:0,13	0/1:96,0,216:.:.:.:.:.	0/1:109,0,72:.:.:.:.:.	0/1:135,0,168:.:.:.:.:.	0/1:36,0,194:.:.:.:.:.	./.:.:.:.:.:.:.	17	9	18	12	11	12	11	11	20	19	CACTIG010000012.1	10238041	10261798	NC_048344.1|18371010|18393119|1|XM_034042559.2|XP_033898450.2|leucine_rich_repeat_containing_23|22110	3343
CACTIG010000012.1	10267188	.	T	G	225.417	SNP	AC=20;AD=9,9;ADF=8,9;ADR=1,0;AN=30;BQBZ=-2.8553;DP=310;DP4=48,12,193,42;FS=0;MQ=35;MQ0F=0;MQBZ=1.09198;MQSBZ=-2.90407;RPBZ=0.630594;SCBZ=1.0761;SGB=-0.691153;VDB=0.886472;SNP;TV	1/1:246,54,0:18:0:0,14:0,4:0,18	1/1:255,84,0:28:0:0,22:0,6:0,28	1/1:250,63,0:21:0:0,18:0,3:0,21	1/1:255,87,0:29:0:0,24:0,5:0,29	1/1:229,36,0:12:0:0,10:0,2:0,12	0/1:183,0,56:.:.:.:.:.	0/1:175,0,133:.:.:.:.:.	0/1:176,0,33:.:.:.:.:.	0/1:179,0,103:.:.:.:.:.	0/1:101,0,134:.:.:.:.:.	21	22	19	16	18	19	29	22	31	14	CACTIG010000012.1	10238041	10261798	NC_048344.1|18371010|18393119|1|XM_034042559.2|XP_033898450.2|leucine_rich_repeat_containing_23|22110	5390
CACTIG010000012.1	10267236	.	T	C	225.417	SNP	AC=20;AD=18,19;ADF=10,15;ADR=8,4;AN=30;BQBZ=0.377234;DP=592;DP4=72,38,342,117;FS=0;MQ=41;MQ0F=0;MQBZ=0.289233;MQSBZ=-2.4497;RPBZ=1.32605;SCBZ=1.65525;SGB=-0.693139;VDB=0.699299;SNP;TS	1/1:255,108,0:36:0:0,22:0,14:0,36	1/1:255,132,0:44:0:0,34:0,10:0,44	1/1:255,96,0:32:0:0,25:0,7:0,32	1/1:255,111,0:37:0:0,22:0,15:0,37	1/1:255,129,0:43:0:0,31:0,12:0,43	0/1:199,0,110:.:.:.:.:.	0/1:244,0,91:.:.:.:.:.	0/1:255,0,68:.:.:.:.:.	0/1:220,0,106:.:.:.:.:.	0/1:202,0,221:.:.:.:.:.	36	39	42	38	39	40	50	35	37	43	CACTIG010000012.1	10238041	10261798	NC_048344.1|18371010|18393119|1|XM_034042559.2|XP_033898450.2|leucine_rich_repeat_containing_23|22110	5438
CACTIG010000012.1	10267709	.	T	C	225.417	SNP	AC=18;AD=4,4;ADF=1,0;ADR=3,4;AN=26;BQBZ=1.18585;DP=147;DP4=16,26,36,58;FS=0;MQ=54;MQ0F=0;MQBZ=-1.57387;MQSBZ=0;RPBZ=1.17617;SCBZ=1.18322;SGB=-0.676189;VDB=0.0268421;SNP;TS	1/1:255,33,0:11:0:0,5:0,6:0,11	1/1:231,33,0:11:0:0,8:0,3:0,11	1/1:188,24,0:8:0:0,3:0,5:0,8	1/1:212,30,0:10:0:0,8:0,2:0,10	1/1:255,33,0:11:0:0,6:0,5:0,11	0/1:136,0,95:.:.:.:.:.	0/1:141,0,170:.:.:.:.:.	0/1:69,0,147:.:.:.:.:.	0/1:85,0,81:.:.:.:.:.	./.:.:.:.:.:.:.	10	17	12	8	9	11	11	9	12	11	CACTIG010000012.1	10238041	10261798	NC_048344.1|18371010|18393119|1|XM_034042559.2|XP_033898450.2|leucine_rich_repeat_containing_23|22110	5911
CACTIG010000012.1	10267724	.	T	C	225.417	SNP	AC=18;AD=4,6;ADF=1,1;ADR=3,5;AN=26;BQBZ=0.0966189;DP=182;DP4=22,30,47,67;FS=0;MQ=55;MQ0F=0;MQBZ=-1.24838;MQSBZ=-0.104828;RPBZ=0.325368;SGB=-0.686358;VDB=0.353483;SNP;TS	1/1:255,42,0:14:0:0,7:0,7:0,14	1/1:255,39,0:13:0:0,9:0,4:0,13	1/1:229,27,0:9:0:0,3:0,6:0,9	1/1:255,33,0:11:0:0,7:0,4:0,11	1/1:255,45,0:15:0:0,9:0,6:0,15	0/1:132,0,93:.:.:.:.:.	0/1:200,0,204:.:.:.:.:.	0/1:83,0,168:.:.:.:.:.	0/1:108,0,78:.:.:.:.:.	./.:.:.:.:.:.:.	12	21	15	10	12	14	14	10	15	17	CACTIG010000012.1	10238041	10261798	NC_048344.1|18371010|18393119|1|XM_034042559.2|XP_033898450.2|leucine_rich_repeat_containing_23|22110	5926
CACTIG010000012.1	10267740	.	T	A	225.417	SNP	AC=18;AD=5,9;ADF=1,1;ADR=4,8;AN=26;BQBZ=-1.24172;DP=181;DP4=20,36,46,72;FS=0;MQ=60;MQ0F=0;MQBZ=-1.56492;MQSBZ=-0.654654;RPBZ=0.984563;SCBZ=-0.935414;SGB=-0.683931;VDB=0.474283;SNP;TV	1/1:255,39,0:13:0:0,6:0,7:0,13	1/1:255,48,0:16:0:0,10:0,6:0,16	1/1:245,30,0:10:0:0,3:0,7:0,10	1/1:255,30,0:10:0:0,6:0,4:0,10	1/1:255,45,0:15:0:0,9:0,6:0,15	0/1:137,0,183:.:.:.:.:.	0/1:185,0,189:.:.:.:.:.	0/1:69,0,165:.:.:.:.:.	0/1:173,0,114:.:.:.:.:.	./.:.:.:.:.:.:.	15	18	12	14	14	13	16	10	12	18	CACTIG010000012.1	10238041	10261798	NC_048344.1|18371010|18393119|1|XM_034042559.2|XP_033898450.2|leucine_rich_repeat_containing_23|22110	5942
CACTIG010000012.1	10267777	.	G	A	225.417	SNP	AC=16;AD=4,10;ADF=2,2;ADR=2,8;AN=22;BQBZ=-1.41421;DP=119;DP4=12,18,39,49;FS=0;MQ=50;MQ0F=0;MQBZ=-1.41421;MQSBZ=-0.33541;RPBZ=-0.774597;SGB=-0.670168;VDB=0.294276;SNP;TS	1/1:250,30,0:10:0:0,5:0,5:0,10	1/1:255,42,0:14:0:0,7:0,7:0,14	1/1:225,24,0:8:0:0,3:0,5:0,8	1/1:179,21,0:7:0:0,1:0,6:0,7	1/1:255,45,0:15:0:0,11:0,4:0,15	0/1:78,0,158:.:.:.:.:.	0/1:105,0,111:.:.:.:.:.	./.:.:.:.:.:.:.	0/1:202,0,91:.:.:.:.:.	./.:.:.:.:.:.:.	9	11	9	14	12	11	14	8	7	15	CACTIG010000012.1	10238041	10261798	NC_048344.1|18371010|18393119|1|XM_034042559.2|XP_033898450.2|leucine_rich_repeat_containing_23|22110	5979
CACTIG010000012.1	10268176	.	A	G	225.417	SNP	AC=20;AD=16,15;ADF=10,8;ADR=6,7;AN=30;BQBZ=-1.72889;DP=419;DP4=52,44,133,162;FS=0;MQ=54;MQ0F=0;MQBZ=-0.591608;MQSBZ=-1.41959;RPBZ=0.303688;SCBZ=1.13621;SGB=-0.686358;VDB=0.570811;SNP;TS	1/1:255,42,0:14:0:0,4:0,10:0,14	1/1:255,63,0:21:0:0,9:0,12:0,21	1/1:255,57,0:19:0:0,10:0,9:0,19	1/1:255,87,0:29:0:0,12:0,17:0,29	1/1:255,84,0:28:0:0,16:0,12:0,28	0/1:223,0,42:.:.:.:.:.	0/1:255,0,209:.:.:.:.:.	0/1:255,0,237:.:.:.:.:.	0/1:255,0,130:.:.:.:.:.	0/1:216,0,255:.:.:.:.:.	24	33	43	22	34	14	22	21	32	28	CACTIG010000012.1	10238041	10261798	NC_048344.1|18371010|18393119|1|XM_034042559.2|XP_033898450.2|leucine_rich_repeat_containing_23|22110	6378
CACTIG010000012.1	10268187	.	A	G	225.421	SNP	AC=20;AD=16,16;ADF=10,8;ADR=6,8;AN=30;BQBZ=0.646633;DP=421;DP4=54,46,129,170;FS=0;MQ=55;MQ0F=0;MQBZ=-0.629153;MQSBZ=-1.62226;RPBZ=-0.336148;SCBZ=1.22276;SGB=-0.690438;VDB=0.748926;SNP;TS	1/1:255,48,0:17:0:0,6:0,10:0,16	1/1:255,66,0:22:0:0,10:0,12:0,22	1/1:255,60,0:20:0:0,9:0,11:0,20	1/1:255,90,0:30:0:0,12:0,18:0,30	1/1:255,84,0:28:0:0,16:0,12:0,28	0/1:255,0,48:.:.:.:.:.	0/1:255,0,193:.:.:.:.:.	0/1:255,0,255:.:.:.:.:.	0/1:255,0,133:.:.:.:.:.	0/1:255,0,255:.:.:.:.:.	21	33	45	21	36	17	22	21	30	29	CACTIG010000012.1	10238041	10261798	NC_048344.1|18371010|18393119|1|XM_034042559.2|XP_033898450.2|leucine_rich_repeat_containing_23|22110	6389
CACTIG010000012.1	10268190	.	T	G	225.421	SNP	AC=20;AD=16,16;ADF=10,7;ADR=6,9;AN=30;BQBZ=1.2061;DP=423;DP4=52,46,123,174;FS=0;MQ=55;MQ0F=0;MQBZ=-0.629153;MQSBZ=-1.62226;RPBZ=-0.336148;SCBZ=1.22276;SGB=-0.690438;VDB=0.737286;SNP;TV	1/1:255,48,0:17:0:0,6:0,10:0,16	1/1:255,66,0:22:0:0,10:0,12:0,22	1/1:255,57,0:19:0:0,8:0,11:0,19	1/1:255,90,0:30:0:0,12:0,18:0,30	1/1:255,87,0:29:0:0,15:0,14:0,29	0/1:255,0,31:.:.:.:.:.	0/1:255,0,206:.:.:.:.:.	0/1:255,0,248:.:.:.:.:.	0/1:255,0,125:.:.:.:.:.	0/1:246,0,255:.:.:.:.:.	21	34	44	20	38	17	22	22	31	31	CACTIG010000012.1	10238041	10261798	NC_048344.1|18371010|18393119|1|XM_034042559.2|XP_033898450.2|leucine_rich_repeat_containing_23|22110	6392
CACTIG010000012.1	10268241	.	G	A	228.386	SNP	AC=20;AD=17,23;ADF=8,6;ADR=9,17;AN=30;BQBZ=2.08593;DP=461;DP4=46,56,117,217;FS=0;MQ=58;MQ0F=0;MQBZ=5.91366;MQSBZ=0.396003;RPBZ=2.00446;SCBZ=-2.8488;SGB=-0.692717;VDB=0.470923;SNP;TS	1/1:255,69,0:23:0:0,8:0,15:0,23	1/1:255,75,0:25:0:0,15:0,10:0,25	1/1:255,81,0:27:0:0,11:0,16:0,27	1/1:255,68,0:36:0:1,14:1,20:2,34	1/1:255,72,0:33:0:1,11:1,20:2,31	0/1:255,0,84:.:.:.:.:.	0/1:192,0,195:.:.:.:.:.	0/1:255,0,227:.:.:.:.:.	0/1:255,0,118:.:.:.:.:.	0/1:255,0,255:.:.:.:.:.	41	31	35	29	44	28	40	37	50	49	CACTIG010000012.1	10238041	10261798	NC_048344.1|18371010|18393119|1|XM_034042559.2|XP_033898450.2|leucine_rich_repeat_containing_23|22110	6443
CACTIG010000012.1	10268274	.	A	T	225.417	SNP	AC=20;AD=21,35;ADF=9,12;ADR=12,23;AN=30;BQBZ=-1.00341;DP=516;DP4=48,80,119,244;FS=0;MQ=59;MQ0F=0;MQBZ=-0.466252;MQSBZ=0.595931;RPBZ=-0.87014;SCBZ=0.957427;SGB=-0.692831;VDB=0.303109;SNP;TV	1/1:255,72,0:24:0:0,7:0,17:0,24	1/1:255,93,0:31:0:0,16:0,15:0,31	1/1:255,111,0:37:0:0,15:0,22:0,37	1/1:255,108,0:36:0:0,9:0,27:0,36	1/1:255,111,0:37:0:0,12:0,25:0,37	0/1:255,0,59:.:.:.:.:.	0/1:118,0,255:.:.:.:.:.	0/1:255,0,193:.:.:.:.:.	0/1:249,0,221:.:.:.:.:.	0/1:255,0,255:.:.:.:.:.	45	29	38	28	62	32	48	48	53	58	CACTIG010000012.1	10238041	10261798	NC_048344.1|18371010|18393119|1|XM_034042559.2|XP_033898450.2|leucine_rich_repeat_containing_23|22110	6476
CACTIG010000012.1	10268350	.	C	G	225.417	SNP	AC=20;AD=16,13;ADF=6,8;ADR=10,5;AN=30;BQBZ=-2.07255;DP=326;DP4=32,56,135,91;FS=0;MQ=55;MQ0F=0;MQBZ=0.875328;MQSBZ=0.843274;RPBZ=0.746688;SCBZ=-2.85299;SGB=-0.689466;VDB=0.290252;SNP;TV	1/1:246,48,0:16:0:0,12:0,4:0,16	1/1:255,60,0:20:0:0,13:0,7:0,20	1/1:255,66,0:22:0:0,11:0,11:0,22	1/1:255,69,0:23:0:0,9:0,14:0,23	1/1:255,54,0:18:0:0,13:0,5:0,18	0/1:182,0,181:.:.:.:.:.	0/1:174,0,144:.:.:.:.:.	0/1:255,0,135:.:.:.:.:.	0/1:242,0,113:.:.:.:.:.	0/1:207,0,253:.:.:.:.:.	29	19	27	20	34	24	30	30	33	23	CACTIG010000012.1	10238041	10261798	NC_048344.1|18371010|18393119|1|XM_034042559.2|XP_033898450.2|leucine_rich_repeat_containing_23|22110	6552
CACTIG010000012.1	10268507	.	A	G	189.416	SNP	AC=20;AD=7,9;ADF=0,4;ADR=7,5;AN=30;BQBZ=-0.702795;DP=210;DP4=19,47,42,100;FS=0;MQ=32;MQ0F=0;MQBZ=0.18073;MQSBZ=2.13348;RPBZ=1.60577;SCBZ=1.25499;SGB=-0.680642;VDB=0.383964;SNP;TS	1/1:219,36,0:12:0:0,4:0,8:0,12	1/1:176,30,0:10:0:0,3:0,7:0,10	1/1:159,27,0:9:0:0,0:0,9:0,9	1/1:172,28,4:9:0:0,2:0,6:0,8	1/1:184,2,0:13:0:0,1:1,11:1,12	0/1:89,0,40:.:.:.:.:.	0/1:77,0,160:.:.:.:.:.	0/1:118,0,80:.:.:.:.:.	0/1:116,0,143:.:.:.:.:.	0/1:118,0,120:.:.:.:.:.	11	12	11	20	16	12	10	10	9	14	CACTIG010000012.1	10238041	10261798	NC_048344.1|18371010|18393119|1|XM_034042559.2|XP_033898450.2|leucine_rich_repeat_containing_23|22110	6709
CACTIG010000012.1	10273506	.	G	A	166.416	SNP	AC=20;AD=3,3;ADF=3,3;ADR=0,0;AN=30;BQBZ=0.57735;DP=110;DP4=15,10,75,8;FS=0;MQ=35;MQ0F=0;MQBZ=-0.57735;MQSBZ=-2.64575;RPBZ=0.942809;SCBZ=0.632456;SGB=-0.651104;VDB=0.000171976;SNP;TS	1/1:159,24,0:8:0:0,7:0,1:0,8	1/1:196,42,0:14:0:0,13:0,1:0,14	1/1:155,24,0:8:0:0,8:0,0:0,8	1/1:153,24,0:8:0:0,7:0,1:0,8	1/1:141,18,0:6:0:0,6:0,0:0,6	0/1:60,0,25:.:.:.:.:.	0/1:79,0,44:.:.:.:.:.	0/1:96,0,50:.:.:.:.:.	0/1:108,0,83:.:.:.:.:.	0/1:35,0,78:.:.:.:.:.	3	7	6	9	6	8	14	8	8	6	CACTIG010000012.1	10238041	10261798	NC_048344.1|18371010|18393119|1|XM_034042559.2|XP_033898450.2|leucine_rich_repeat_containing_23|22110	11708
CACTIG010000012.1	10273530	.	A	G	174.416	SNP	AC=20;AD=6,3;ADF=6,3;ADR=0,0;AN=30;BQBZ=0;DP=164;DP4=23,8,114,18;FS=0;MQ=36;MQ0F=0;MQBZ=-0.979796;MQSBZ=-3.16228;RPBZ=0.977008;SCBZ=0.57735;SGB=-0.676189;VDB=0.000980876;SNP;TS	1/1:180,33,0:11:0:0,10:0,1:0,11	1/1:204,54,0:18:0:0,17:0,1:0,18	1/1:173,33,0:11:0:0,11:0,0:0,11	1/1:200,45,0:15:0:0,14:0,1:0,15	1/1:195,42,0:14:0:0,12:0,2:0,14	0/1:80,0,48:.:.:.:.:.	0/1:77,0,20:.:.:.:.:.	0/1:134,0,55:.:.:.:.:.	0/1:143,0,30:.:.:.:.:.	0/1:45,0,124:.:.:.:.:.	5	5	13	10	9	11	18	11	15	14	CACTIG010000012.1	10238041	10261798	NC_048344.1|18371010|18393119|1|XM_034042559.2|XP_033898450.2|leucine_rich_repeat_containing_23|22110	11732
CACTIG010000012.1	10858510	.	c	cA	192.323	INS	AC=20;AD=10,17;ADF=5,4;ADR=5,13;AN=30;DP=517;DP4=58,69,43,162;FS=0;IDV=9;IMF=0.310345;MQ=35;MQ0F=0;MQBZ=-0.904811;MQSBZ=-0.660033;RPBZ=0.968169;SCBZ=1.49071;SGB=-0.662043;VDB=9.32379e-05;INDEL;INS;TV	1/1:89,1,0:18:0:3,3:6,6:9,9	1/1:150,18,0:15:0:1,6:2,6:3,12	1/1:111,8,0:14:8:2,2:1,9:3,11	1/1:219,32,0:21:18:3,3:0,15:3,18	1/1:100,0,0:18:11:3,1:3,11:6,12	0/1:154,0,12:.:.:.:.:.	0/1:153,0,12:.:.:.:.:.	0/1:161,0,7:.:.:.:.:.	0/1:114,0,9:.:.:.:.:.	0/1:152,0,14:.:.:.:.:.	24	41	42	49	48	32	24	25	43	28	CACTIG010000012.1	10706828	10842381	NC_048344.1|18066687|18213358|1|XM_034042263.2|XP_033898154.2|CD209_antigen-like_protein_E,_transcript_variant_X2|146672	16129
CACTIG010000012.1	11201099	.	T	C	228.322	SNP	AC=20;AD=11,27;ADF=9,14;ADR=2,13;AN=30;BQBZ=1.90969;DP=339;DP4=41,34,142,100;FS=0;MQ=31;MQ0F=0;MQBZ=-1.67812;MQSBZ=0.53743;RPBZ=-0.365309;SCBZ=0.342467;SGB=-0.691153;VDB=0.0721029;SNP;TS	1/1:255,43,0:19:0:1,12:0,6:1,18	1/1:107,12,0:4:0:0,3:0,1:0,4	1/1:123,21,0:7:0:0,4:0,3:0,7	1/1:155,24,0:8:0:0,5:0,3:0,8	1/1:172,30,0:10:0:0,5:0,5:0,10	0/1:193,0,59:.:.:.:.:.	0/1:200,0,158:.:.:.:.:.	0/1:249,0,110:.:.:.:.:.	0/1:153,0,53:.:.:.:.:.	0/1:249,0,177:.:.:.:.:.	30	43	39	27	57	28	11	24	27	23	CACTIG010000012.1	11195341	11220103	NW_023260931.1|40690|65552|1|XM_034916344.1|XP_034772235.1|uncharacterized_LOC117968571,_transcript_variant_X1|24863	0
CACTIG010000012.1	11218722	.	G	T,A	228.213	SNP	AC=18,2;AD=11,18,14;ADF=4,10,8;ADR=7,8,6;AN=30;BQBZ=2.79781;DP=383;DP4=55,48,147,127;FS=0;MQ=28;MQ0F=0;MQBZ=1.9188;MQSBZ=-1.80804;RPBZ=0.762966;SCBZ=-1.27783;SGB=-0.692352;VDB=0.000473471;SNP;TS;TV	1/1:255,77,23,.,.,.:21:0:0,8,.:0,10,.:0,18,.	1/1:255,37,0,.,.,.:26:3:1,15,.:2,8,.:3,23,.	1/1:219,51,0,.,.,.:19:0:0,12,.:0,5,.:0,17,.	1/1:201,45,0,.,.,.:17:0:0,12,.:0,3,.:0,15,.	1/1:221,45,0,.,.,.:15:0:0,5,.:0,10,.:0,15,.	0/1:167,0,169,.,.,.:.:.:.:.:.	0/1:130,0,195,.,.,.:.:.:.:.:.	0/1:46,0,21,.,.,.:.:.:.:.:.	0/1:185,0,172,.,.,.:.:.:.:.:.	0/2:196,.,.,0,.,224:.:.:.:.:.	32	36	6	39	34	22	27	19	18	19	CACTIG010000012.1	11195341	11220103	NW_023260931.1|40690|65552|1|XM_034916344.1|XP_034772235.1|uncharacterized_LOC117968571,_transcript_variant_X1|24863	0
CACTIG010000012.1	13005706	.	taa	t,ta,tAAAAaa	225.421	DEL	AC=18,10,2;AD=0,5,9,2;ADF=0,3,5,1;ADR=0,2,4,1;AN=30;DP=295;DP4=0,2,70,89;FS=0;IDV=10;IMF=0.769231;MQ=60;MQ0F=0;MQBZ=-0.68313;MQSBZ=-0.707107;RPBZ=-2.36969;SCBZ=-1.82574;SGB=-0.670168;VDB=0.577201;DEL;INDEL;INS;TV	1/1:255,30,0,.,.,.,.,.,.,.:10:0:0,4,.,.:0,6,.,.:0,10,.,.	1/1:255,40,13,.,.,.,.,.,.,.:10:0:0,2,.,.:0,7,.,.:0,9,.,.	1/1:229,18,0,.,.,.,.,.,.,.:6:0:0,4,.,.:0,2,.,.:0,6,.,.	1/1:181,26,8,.,.,.,.,.,.,.:8:0:0,3,.,.:0,3,.,.:0,6,.,.	1/1:255,36,0,.,.,.,.,.,.,.:13:0:0,5,.,.:0,7,.,.:0,12,.,.	1/2:239,109,94,159,0,138,.,.,.,.:.:.:.:.:.	3/1:151,86,80,.,.,.,72,0,.,66:.:.:.:.:.	2/1:255,156,152,171,0,160,.,.,.,.:.:.:.:.:.	1/2:235,96,81,162,0,147,.,.,.,.:.:.:.:.:.	2/2:160,.,.,27,.,0,.,.,.,.:.:.:.:.:.	22	19	31	15	16	14	16	15	22	23	CACTIG010000012.1	12999863	13005819	NC_048344.1|16561379|16567432|-1|XM_034042111.2|XP_033898002.1|uncharacterized_protein_LOC436805_homolog|6054	0
CACTIG010000012.1	13052405	.	G	T	212.417	SNP	AC=20;AD=8,10;ADF=4,9;ADR=4,1;AN=30;BQBZ=-0.459437;DP=228;DP4=38,36,75,71;FS=0;MQ=34;MQ0F=0;MQBZ=-2.04859;MQSBZ=-1.88081;RPBZ=-1.55735;SCBZ=0.852803;SGB=-0.683931;VDB=0.1621;SNP;TV	1/1:242,39,0:13:0:0,8:0,5:0,13	1/1:141,18,0:6:0:0,5:0,1:0,6	1/1:171,27,0:9:0:0,7:0,2:0,9	1/1:216,30,0:10:0:0,7:0,3:0,10	1/1:194,36,0:13:0:0,4:0,8:0,12	0/1:116,0,88:.:.:.:.:.	0/1:50,0,196:.:.:.:.:.	0/1:145,0,171:.:.:.:.:.	0/1:55,0,130:.:.:.:.:.	0/1:144,0,165:.:.:.:.:.	10	18	21	12	19	14	6	9	10	13	CACTIG010000012.1	13034475	13039316	NC_048344.1|16597281|16601791|-1|XM_034042043.2|XP_033897934.2|adenosine_receptor_A1-like|4511	13089
CACTIG010000012.1	13204929	.	A	G	225.417	SNP	AC=20;AD=13,14;ADF=6,11;ADR=7,3;AN=30;BQBZ=-0.112651;DP=312;DP4=42,52,104,101;FS=0;MQ=59;MQ0F=0;MQBZ=-1;MQSBZ=0.374513;RPBZ=0.315527;SGB=-0.680642;VDB=0.376267;SNP;TS	1/1:254,36,0:12:0:0,5:0,7:0,12	1/1:255,42,0:14:0:0,8:0,6:0,14	1/1:255,51,0:17:0:0,9:0,8:0,17	1/1:255,48,0:16:0:0,6:0,10:0,16	1/1:255,132,0:44:0:0,18:0,26:0,44	0/1:163,0,171:.:.:.:.:.	0/1:225,0,209:.:.:.:.:.	0/1:141,0,170:.:.:.:.:.	0/1:164,0,132:.:.:.:.:.	0/1:249,0,228:.:.:.:.:.	16	28	17	17	30	14	14	17	16	50	CACTIG010000012.1	13190862	13207972	NC_048344.1|16141347|16163508|-1|XM_034041956.2|XP_033897847.2|DBH-like_monooxygenase_protein_2_homolog|22162	0
CACTIG010000012.1	13204964	.	T	G	225.417	SNP	AC=20;AD=18,20;ADF=10,16;ADR=8,4;AN=30;BQBZ=1.2116;DP=310;DP4=53,48,114,93;FS=0;MQ=57;MQ0F=0;MQBZ=-1;MQSBZ=0.899541;RPBZ=1.28553;SCBZ=1.33012;SGB=-0.670168;VDB=0.560195;SNP;TV	1/1:234,30,0:10:0:0,5:0,5:0,10	1/1:255,48,0:16:0:0,7:0,9:0,16	1/1:255,57,0:19:0:0,10:0,9:0,19	1/1:255,42,0:14:0:0,8:0,6:0,14	1/1:255,114,0:38:0:0,16:0,22:0,38	0/1:139,0,116:.:.:.:.:.	0/1:214,0,193:.:.:.:.:.	0/1:136,0,193:.:.:.:.:.	0/1:192,0,139:.:.:.:.:.	0/1:229,0,253:.:.:.:.:.	12	22	15	17	40	10	17	19	15	40	CACTIG010000012.1	13190862	13207972	NC_048344.1|16141347|16163508|-1|XM_034041956.2|XP_033897847.2|DBH-like_monooxygenase_protein_2_homolog|22162	0
CACTIG010000012.1	13207589	.	C	G	225.417	SNP	AC=20;AD=9,6;ADF=4,4;ADR=5,2;AN=30;BQBZ=1.81911;DP=202;DP4=32,36,80,53;FS=0;MQ=60;MQ0F=0;RPBZ=2.10439;SGB=-0.680642;VDB=0.808889;SNP;TV	1/1:255,36,0:12:0:0,6:0,6:0,12	1/1:255,45,0:15:0:0,12:0,3:0,15	1/1:150,15,0:5:0:0,2:0,3:0,5	1/1:255,33,0:11:0:0,7:0,4:0,11	1/1:255,78,0:26:0:0,13:0,13:0,26	0/1:125,0,147:.:.:.:.:.	0/1:147,0,47:.:.:.:.:.	0/1:89,0,177:.:.:.:.:.	0/1:199,0,185:.:.:.:.:.	0/1:124,0,208:.:.:.:.:.	11	9	12	19	16	12	16	5	12	27	CACTIG010000012.1	13190862	13207972	NC_048344.1|16141347|16163508|-1|XM_034041956.2|XP_033897847.2|DBH-like_monooxygenase_protein_2_homolog|22162	0
CACTIG010000012.1	13207611	.	A	G	225.417	SNP	AC=20;AD=13,5;ADF=5,3;ADR=8,2;AN=30;BQBZ=1.55922;DP=241;DP4=46,40,99,53;FS=0;MQ=60;MQ0F=0;RPBZ=1.15124;SGB=-0.690438;VDB=0.509204;SNP;TS	1/1:255,51,0:17:0:0,10:0,7:0,17	1/1:255,45,0:15:0:0,10:0,5:0,15	1/1:195,21,0:7:0:0,4:0,3:0,7	1/1:220,27,0:9:0:0,7:0,2:0,9	1/1:255,72,0:24:0:0,16:0,8:0,24	0/1:157,0,131:.:.:.:.:.	0/1:183,0,50:.:.:.:.:.	0/1:117,0,135:.:.:.:.:.	0/1:218,0,170:.:.:.:.:.	0/1:104,0,206:.:.:.:.:.	14	12	16	22	20	18	16	7	10	26	CACTIG010000012.1	13190862	13207972	NC_048344.1|16141347|16163508|-1|XM_034041956.2|XP_033897847.2|DBH-like_monooxygenase_protein_2_homolog|22162	0
CACTIG010000012.1	13216711	.	G	A	225.417	SNP	AC=20;AD=2,6;ADF=0,0;ADR=2,6;AN=30;BQBZ=-0.435223;DP=216;DP4=30,26,65,89;FS=0;MQ=45;MQ0F=0;MQBZ=-1.21564;MQSBZ=-1.38788;RPBZ=0.707107;SCBZ=1.19523;SGB=-0.683931;VDB=0.010312;SNP;TS	1/1:255,39,0:13:0:0,5:0,8:0,13	1/1:152,24,0:8:0:0,3:0,5:0,8	1/1:195,27,0:9:0:0,3:0,6:0,9	1/1:180,24,0:8:0:0,6:0,2:0,8	1/1:255,51,0:17:0:0,12:0,5:0,17	0/1:158,0,118:.:.:.:.:.	0/1:236,0,93:.:.:.:.:.	0/1:37,0,209:.:.:.:.:.	0/1:255,0,70:.:.:.:.:.	0/1:48,0,36:.:.:.:.:.	19	25	18	23	10	16	8	10	10	21	CACTIG010000012.1	13190862	13207972	NC_048344.1|16141347|16163508|-1|XM_034041956.2|XP_033897847.2|DBH-like_monooxygenase_protein_2_homolog|22162	8739
CACTIG010000012.1	13217117	.	T	C	225.417	SNP	AC=20;AD=6,17;ADF=6,12;ADR=0,5;AN=30;BQBZ=0.272591;DP=305;DP4=34,24,125,111;FS=0;MQ=60;MQ0F=0;RPBZ=0.702194;SGB=-0.692914;VDB=0.671461;SNP;TS	1/1:255,75,0:25:0:0,10:0,15:0,25	1/1:255,51,0:17:0:0,12:0,5:0,17	1/1:255,69,0:23:0:0,13:0,10:0,23	1/1:255,48,0:16:0:0,8:0,8:0,16	1/1:255,93,0:31:0:0,12:0,19:0,31	0/1:255,0,64:.:.:.:.:.	0/1:255,0,91:.:.:.:.:.	0/1:186,0,212:.:.:.:.:.	0/1:198,0,111:.:.:.:.:.	0/1:255,0,89:.:.:.:.:.	16	23	19	15	23	26	17	24	18	31	CACTIG010000012.1	13190862	13207972	NC_048344.1|16141347|16163508|-1|XM_034041956.2|XP_033897847.2|DBH-like_monooxygenase_protein_2_homolog|22162	9145
CACTIG010000012.1	13217627	.	T	C	225.417	SNP	AC=16;AD=9,9;ADF=4,6;ADR=5,3;AN=22;BQBZ=-1.20109;DP=189;DP4=20,30,67,59;FS=0;MQ=51;MQ0F=0;MQBZ=-0.550482;MQSBZ=1.45274;RPBZ=-2.2497;SCBZ=-1.60631;SGB=-0.688148;VDB=0.688648;SNP;TS	1/1:255,45,0:15:0:0,7:0,8:0,15	1/1:255,42,0:14:0:0,6:0,8:0,14	1/1:255,42,0:14:0:0,6:0,8:0,14	1/1:255,36,0:12:0:0,4:0,8:0,12	1/1:255,33,0:11:0:0,6:0,5:0,11	0/1:221,0,215:.:.:.:.:.	0/1:233,0,164:.:.:.:.:.	./.:.:.:.:.:.:.	0/1:214,0,196:.:.:.:.:.	./.:.:.:.:.:.:.	21	19	3	20	14	15	15	14	14	11	CACTIG010000012.1	13190862	13207972	NC_048344.1|16141347|16163508|-1|XM_034041956.2|XP_033897847.2|DBH-like_monooxygenase_protein_2_homolog|22162	9655
CACTIG010000012.1	13427716	.	A	C	175.416	SNP	AC=10;AD=0,4;ADF=0,1;ADR=0,3;AN=10;DP=24;DP4=0,0,10,13;FS=0;MQ=31;MQ0F=0;MQSBZ=1.22474;SGB=-0.511536;VDB=0.800701;SNP;TV	1/1:82,9,0:3:0:0,1:0,2:0,3	1/1:69,6,0:2:0:0,1:0,1:0,2	1/1:205,30,0:10:0:0,5:0,5:0,10	1/1:130,12,0:4:0:0,2:0,2:0,4	1/1:99,12,0:4:0:0,1:0,3:0,4	./.:.:.:.:.:.:.	./.:.:.:.:.:.:.	./.:.:.:.:.:.:.	./.:.:.:.:.:.:.	./.:.:.:.:.:.:.	9	12	2	5	11	5	2	11	4	9	CACTIG010000012.1	13385816	13441012	NC_048344.1|16081693|16114792|-1|XM_034904561.1|XP_034760452.1|C-type_lectin_domain_family_4_member_E-like,_transcript_variant_X1|33100	0
CACTIG010000012.1	13427755	.	A	C	124.416	SNP	AC=10;AD=0,4;ADF=0,2;ADR=0,2;AN=10;DP=24;DP4=0,0,11,13;FS=0;MQ=40;MQ0F=0;MQSBZ=0.296174;SGB=-0.590765;VDB=0.661214;SNP;TV	1/1:150,15,0:5:0:0,2:0,3:0,5	1/1:106,12,0:4:0:0,2:0,2:0,4	1/1:154,21,0:7:0:0,3:0,4:0,7	1/1:134,12,0:4:0:0,2:0,2:0,4	1/1:68,12,0:4:0:0,2:0,2:0,4	./.:.:.:.:.:.:.	./.:.:.:.:.:.:.	./.:.:.:.:.:.:.	./.:.:.:.:.:.:.	./.:.:.:.:.:.:.	3	9	3	4	10	5	4	7	4	4	CACTIG010000012.1	13385816	13441012	NC_048344.1|16081693|16114792|-1|XM_034904561.1|XP_034760452.1|C-type_lectin_domain_family_4_member_E-like,_transcript_variant_X1|33100	0
CACTIG010000012.1	13428054	.	C	T	225.417	SNP	AC=10;AD=1,8;ADF=1,6;ADR=0,2;AN=10;BQBZ=0.460487;DP=44;DP4=3,0,26,13;FS=0;MQ=37;MQ0F=0;MQBZ=1.74953;MQSBZ=0.47055;RPBZ=2.1559;SGB=-0.670168;VDB=0.508631;SNP;TS	1/1:178,6,0:12:0:2,7:0,3:2,10	1/1:109,12,0:4:0:0,4:0,0:0,4	1/1:178,18,0:6:0:0,3:0,3:0,6	1/1:255,33,0:11:0:0,6:0,5:0,11	1/1:191,12,0:9:0:1,6:0,2:1,8	./.:.:.:.:.:.:.	./.:.:.:.:.:.:.	./.:.:.:.:.:.:.	./.:.:.:.:.:.:.	./.:.:.:.:.:.:.	9	6	10	7	23	12	4	6	12	10	CACTIG010000012.1	13385816	13441012	NC_048344.1|16081693|16114792|-1|XM_034904561.1|XP_034760452.1|C-type_lectin_domain_family_4_member_E-like,_transcript_variant_X1|33100	0
CACTIG010000012.1	13430617	.	G	C	225.417	SNP	AC=16;AD=6,10;ADF=2,2;ADR=4,8;AN=22;BQBZ=0.949028;DP=151;DP4=18,22,32,75;FS=0;MQ=57;MQ0F=0;MQBZ=-1.41421;MQSBZ=-0.988623;RPBZ=-0.680557;SGB=-0.69168;VDB=0.446656;SNP;TV	1/1:255,57,0:19:0:0,6:0,13:0,19	1/1:118,12,0:4:0:0,1:0,3:0,4	1/1:162,18,0:6:0:0,3:0,3:0,6	1/1:91,9,0:3:0:0,1:0,2:0,3	1/1:255,45,0:15:0:0,7:0,8:0,15	0/1:77,0,188:.:.:.:.:.	0/1:255,0,123:.:.:.:.:.	./.:.:.:.:.:.:.	0/1:211,0,135:.:.:.:.:.	./.:.:.:.:.:.:.	12	24	4	17	11	20	5	7	3	16	CACTIG010000012.1	13385816	13441012	NC_048344.1|16081693|16114792|-1|XM_034904561.1|XP_034760452.1|C-type_lectin_domain_family_4_member_E-like,_transcript_variant_X1|33100	0
CACTIG010000012.1	13431924	.	T	G	156.416	SNP	AC=12;AD=4,3;ADF=3,2;ADR=1,1;AN=14;BQBZ=1.56038;DP=41;DP4=6,2,16,15;FS=0;MQ=50;MQ0F=0;MQBZ=-2.2014;MQSBZ=-0.213664;RPBZ=-1.41421;SGB=-0.636426;VDB=0.559649;SNP;TV	1/1:186,21,0:7:0:0,2:0,5:0,7	1/1:102,12,0:4:0:0,1:0,3:0,4	1/1:118,15,0:5:0:0,4:0,1:0,5	1/1:153,15,0:5:0:0,2:0,3:0,5	1/1:139,12,0:4:0:0,3:0,1:0,4	./.:.:.:.:.:.:.	./.:.:.:.:.:.:.	./.:.:.:.:.:.:.	./.:.:.:.:.:.:.	0/1:65,0,86:.:.:.:.:.	10	5	6	8	8	10	5	6	6	6	CACTIG010000012.1	13385816	13441012	NC_048344.1|16081693|16114792|-1|XM_034904561.1|XP_034760452.1|C-type_lectin_domain_family_4_member_E-like,_transcript_variant_X1|33100	0
CACTIG010000012.1	13433190	.	T	C	199.416	SNP	AC=12;AD=8,6;ADF=5,2;ADR=3,4;AN=14;BQBZ=-2.13497;DP=68;DP4=10,6,28,23;FS=0;MQ=37;MQ0F=0;MQBZ=-3.24037;MQSBZ=-1.19491;RPBZ=-0.420703;SGB=-0.511536;VDB=0.549396;SNP;TS	1/1:68,9,0:3:0:0,3:0,0:0,3	1/1:229,33,0:11:0:0,5:0,6:0,11	1/1:140,18,0:6:0:0,4:0,2:0,6	1/1:147,24,0:8:0:0,8:0,0:0,8	1/1:193,24,0:8:0:0,4:0,4:0,8	./.:.:.:.:.:.:.	./.:.:.:.:.:.:.	./.:.:.:.:.:.:.	./.:.:.:.:.:.:.	0/1:114,0,180:.:.:.:.:.	5	10	6	8	17	3	11	7	8	10	CACTIG010000012.1	13385816	13441012	NC_048344.1|16081693|16114792|-1|XM_034904561.1|XP_034760452.1|C-type_lectin_domain_family_4_member_E-like,_transcript_variant_X1|33100	0
CACTIG010000012.1	13433233	.	T	G	157.416	SNP	AC=12;AD=8,10;ADF=4,5;ADR=4,5;AN=14;BQBZ=-1.61808;DP=82;DP4=10,10,33,25;FS=0;MQ=22;MQ0F=0;MQBZ=1.84072;MQSBZ=-1.22474;RPBZ=-1.1619;SCBZ=-1;SGB=-0.511536;VDB=0.440791;SNP;TV	1/1:60,9,0:3:0:0,1:0,2:0,3	1/1:183,30,0:10:0:0,6:0,4:0,10	1/1:187,27,0:9:0:0,5:0,4:0,9	1/1:147,21,0:7:0:0,5:0,2:0,7	1/1:183,18,0:9:0:1,6:0,2:1,8	./.:.:.:.:.:.:.	./.:.:.:.:.:.:.	./.:.:.:.:.:.:.	./.:.:.:.:.:.:.	0/1:165,0,169:.:.:.:.:.	5	9	9	6	27	3	11	9	12	15	CACTIG010000012.1	13385816	13441012	NC_048344.1|16081693|16114792|-1|XM_034904561.1|XP_034760452.1|C-type_lectin_domain_family_4_member_E-like,_transcript_variant_X1|33100	0
CACTIG010000012.1	13434712	.	A	T	187.416	SNP	AC=17;AD=8,12;ADF=6,6;ADR=2,6;AN=24;BQBZ=1.6323;DP=219;DP4=22,25,94,74;FS=0;MQ=22;MQ0F=0;MQBZ=-1.61779;MQSBZ=-0.131145;RPBZ=0.745849;SCBZ=0.927173;SGB=-0.688148;VDB=0.0383768;SNP;TV	1/1:167,42,0:15:0:0,11:0,3:0,14	1/1:108,28,0:14:0:1,10:0,2:1,12	1/1:129,36,0:12:0:0,8:0,4:0,12	1/1:172,32,0:21:0:0,11:1,9:1,20	1/1:217,51,0:17:0:0,7:0,10:0,17	0/1:72,0,75:.:.:.:.:.	./.:.:.:.:.:.:.	./.:.:.:.:.:.:.	0/1:42,0,78:.:.:.:.:.	./.:.:.:.:.:.:.	16	19	18	16	22	15	14	14	22	19	CACTIG010000012.1	13385816	13441012	NC_048344.1|16081693|16114792|-1|XM_034904561.1|XP_034760452.1|C-type_lectin_domain_family_4_member_E-like,_transcript_variant_X1|33100	0
CACTIG010000012.1	13435170	.	G	T	105.415	SNP	AC=12;AD=6,5;ADF=3,5;ADR=3,0;AN=14;BQBZ=0.600546;DP=41;DP4=6,6,22,7;FS=0;MQ=35;MQ0F=0;MQBZ=-2.99456;MQSBZ=0.790569;RPBZ=-1.27802;SGB=-0.590765;VDB=0.746873;SNP;TV	1/1:126,15,0:5:0:0,4:0,1:0,5	1/1:104,12,0:4:0:0,3:0,1:0,4	1/1:99,12,0:4:0:0,3:0,1:0,4	1/1:68,6,0:2:0:0,0:0,2:0,2	1/1:135,12,0:4:0:0,2:0,2:0,4	./.:.:.:.:.:.:.	0/1:88,0,146:.:.:.:.:.	./.:.:.:.:.:.:.	./.:.:.:.:.:.:.	./.:.:.:.:.:.:.	13	11	9	14	7	5	4	4	2	4	CACTIG010000012.1	13385816	13441012	NC_048344.1|16081693|16114792|-1|XM_034904561.1|XP_034760452.1|C-type_lectin_domain_family_4_member_E-like,_transcript_variant_X1|33100	0
CACTIG010000012.1	13435463	.	T	C	207.417	SNP	AC=14;AD=9,9;ADF=7,3;ADR=2,6;AN=18;BQBZ=1.50493;DP=122;DP4=20,12,24,61;FS=0;MQ=32;MQ0F=0;MQBZ=0;MQSBZ=1.79943;RPBZ=-0.430946;SGB=-0.676189;VDB=0.0471825;SNP;TS	1/1:207,33,0:11:0:0,4:0,7:0,11	1/1:174,30,0:10:0:0,2:0,8:0,10	1/1:237,45,0:15:0:0,2:0,13:0,15	1/1:224,30,0:10:0:0,5:0,5:0,10	1/1:200,27,0:9:0:0,2:0,7:0,9	./.:.:.:.:.:.:.	0/1:105,0,132:.:.:.:.:.	./.:.:.:.:.:.:.	0/1:183,0,171:.:.:.:.:.	./.:.:.:.:.:.:.	12	14	12	20	12	11	10	15	10	9	CACTIG010000012.1	13385816	13441012	NC_048344.1|16081693|16114792|-1|XM_034904561.1|XP_034760452.1|C-type_lectin_domain_family_4_member_E-like,_transcript_variant_X1|33100	0
CACTIG010000012.1	13435864	.	T	C	228.222	SNP	AC=18;AD=9,9;ADF=6,8;ADR=3,1;AN=26;BQBZ=-0.221181;DP=226;DP4=53,34,55,78;FS=0;MQ=39;MQ0F=0;MQBZ=0.837276;MQSBZ=0.200147;RPBZ=-1.2255;SCBZ=0.460338;SGB=-0.689466;VDB=0.00478342;SNP;TS	1/1:255,26,0:17:0:1,6:0,10:1,16	1/1:210,24,0:8:0:0,5:0,3:0,8	1/1:255,36,0:12:0:0,5:0,7:0,12	1/1:189,24,0:8:0:0,2:0,6:0,8	1/1:255,3,0:21:8:2,7:0,12:2,19	0/1:75,0,104:.:.:.:.:.	0/1:129,0,134:.:.:.:.:.	./.:.:.:.:.:.:.	0/1:133,0,255:.:.:.:.:.	0/1:160,0,154:.:.:.:.:.	12	19	19	33	19	24	12	18	10	26	CACTIG010000012.1	13385816	13441012	NC_048344.1|16081693|16114792|-1|XM_034904561.1|XP_034760452.1|C-type_lectin_domain_family_4_member_E-like,_transcript_variant_X1|33100	0
CACTIG010000012.1	13436373	.	gt	g	125.416	DEL	AC=10;AD=0,4;ADF=0,2;ADR=0,2;AN=10;DP=29;DP4=0,0,8,16;FS=0;IDV=4;IMF=0.571429;MQ=60;MQ0F=0;MQBZ=2.36643;MQSBZ=-1.09545;RPBZ=-2.14052;SCBZ=-2.34057;SGB=-0.556411;VDB=0.751039;DEL;INDEL;TV	1/1:88,12,0:4:0:0,0:0,4:0,4	1/1:155,21,0:7:0:0,3:0,4:0,7	1/1:119,15,0:5:0:0,1:0,4:0,5	1/1:106,12,0:4:0:0,2:0,2:0,4	1/1:101,12,0:4:0:0,2:0,2:0,4	./.:.:.:.:.:.:.	./.:.:.:.:.:.:.	./.:.:.:.:.:.:.	./.:.:.:.:.:.:.	./.:.:.:.:.:.:.	6	7	6	7	11	7	8	7	4	5	CACTIG010000012.1	13385816	13441012	NC_048344.1|16081693|16114792|-1|XM_034904561.1|XP_034760452.1|C-type_lectin_domain_family_4_member_E-like,_transcript_variant_X1|33100	0
CACTIG010000012.1	13436579	.	T	C	165.416	SNP	AC=10;AD=0,5;ADF=0,3;ADR=0,2;AN=10;DP=25;DP4=0,0,15,10;FS=0;MQ=45;MQ0F=0;MQSBZ=1;SGB=-0.556411;VDB=0.714437;SNP;TS	1/1:135,12,0:4:0:0,2:0,2:0,4	1/1:195,21,0:7:0:0,5:0,2:0,7	1/1:102,9,0:3:0:0,1:0,2:0,3	1/1:180,18,0:6:0:0,4:0,2:0,6	1/1:160,15,0:5:0:0,3:0,2:0,5	./.:.:.:.:.:.:.	./.:.:.:.:.:.:.	./.:.:.:.:.:.:.	./.:.:.:.:.:.:.	./.:.:.:.:.:.:.	9	6	9	8	7	4	8	4	7	5	CACTIG010000012.1	13385816	13441012	NC_048344.1|16081693|16114792|-1|XM_034904561.1|XP_034760452.1|C-type_lectin_domain_family_4_member_E-like,_transcript_variant_X1|33100	0
CACTIG010000012.1	13436620	.	C	A	166.416	SNP	AC=10;AD=0,8;ADF=0,4;ADR=0,4;AN=10;DP=26;DP4=0,0,15,11;FS=0;MQ=60;MQ0F=0;MQSBZ=1.52753;SGB=-0.556411;VDB=0.325692;SNP;TV	1/1:128,12,0:4:0:0,2:0,2:0,4	1/1:196,21,0:7:0:0,5:0,2:0,7	1/1:90,9,0:3:0:0,0:0,3:0,3	1/1:112,12,0:4:0:0,4:0,0:0,4	1/1:178,24,0:8:0:0,4:0,4:0,8	./.:.:.:.:.:.:.	./.:.:.:.:.:.:.	./.:.:.:.:.:.:.	./.:.:.:.:.:.:.	./.:.:.:.:.:.:.	5	6	11	6	8	4	8	4	4	8	CACTIG010000012.1	13385816	13441012	NC_048344.1|16081693|16114792|-1|XM_034904561.1|XP_034760452.1|C-type_lectin_domain_family_4_member_E-like,_transcript_variant_X1|33100	0
CACTIG010000012.1	13437165	.	C	T	225.417	SNP	AC=20;AD=3,8;ADF=2,7;ADR=1,1;AN=30;BQBZ=0.412955;DP=284;DP4=23,21,150,83;FS=0;MQ=30;MQ0F=0;MQBZ=-1.83567;MQSBZ=-1.18898;RPBZ=0.820297;SGB=-0.69312;VDB=0.776612;SNP;TS	1/1:255,96,0:32:0:0,18:0,14:0,32	1/1:190,30,0:10:0:0,7:0,3:0,10	1/1:245,36,0:12:0:0,6:0,6:0,12	1/1:255,45,0:15:0:0,11:0,4:0,15	1/1:255,72,0:24:0:0,17:0,7:0,24	0/1:196,0,81:.:.:.:.:.	0/1:242,0,19:.:.:.:.:.	0/1:70,0,39:.:.:.:.:.	0/1:218,0,125:.:.:.:.:.	0/1:155,0,47:.:.:.:.:.	20	26	6	24	11	33	11	13	15	25	CACTIG010000012.1	13385816	13441012	NC_048344.1|16081693|16114792|-1|XM_034904561.1|XP_034760452.1|C-type_lectin_domain_family_4_member_E-like,_transcript_variant_X1|33100	0
CACTIG010000012.1	13484114	.	T	G	225.421	SNP	AC=20;AD=5,36;ADF=3,30;ADR=2,6;AN=30;BQBZ=-2.43402;DP=560;DP4=50,30,332,121;FS=0;MQ=50;MQ0F=0;MQBZ=0.579111;MQSBZ=1.90843;RPBZ=-2.17677;SGB=-0.69311;VDB=0.986912;SNP;TV	1/1:255,90,0:31:0:0,22:0,8:0,30	1/1:255,135,0:45:0:0,34:0,11:0,45	1/1:255,63,0:21:0:0,14:0,7:0,21	1/1:255,84,0:28:0:0,18:0,10:0,28	1/1:255,163,0:54:0:0,45:0,9:0,54	0/1:255,0,146:.:.:.:.:.	0/1:255,0,74:.:.:.:.:.	0/1:255,0,157:.:.:.:.:.	0/1:255,0,195:.:.:.:.:.	0/1:255,0,36:.:.:.:.:.	34	37	42	34	42	32	48	24	28	61	CACTIG010000012.1	13480227	13488089	NC_048344.1|16041296|16048962|-1|XM_034904678.1|XP_034760569.1|DBH-like_monooxygenase_protein_2_homolog|7667	0
CACTIG010000012.1	14107089	.	A	G	225.417	SNP	AC=20;AD=13,12;ADF=9,3;ADR=4,9;AN=30;BQBZ=1.0719;DP=340;DP4=56,30,72,174;FS=0;MQ=57;MQ0F=0;MQBZ=-3.13368;MQSBZ=-1.31318;RPBZ=-0.434665;SCBZ=0.784465;SGB=-0.688148;VDB=0.110686;SNP;TS	1/1:255,45,0:15:0:0,5:0,10:0,15	1/1:255,60,0:20:0:0,7:0,13:0,20	1/1:255,75,0:25:0:0,5:0,20:0,25	1/1:255,81,0:27:0:0,11:0,16:0,27	1/1:255,63,0:21:0:0,10:0,11:0,21	0/1:221,0,144:.:.:.:.:.	0/1:218,0,84:.:.:.:.:.	0/1:235,0,188:.:.:.:.:.	0/1:237,0,120:.:.:.:.:.	0/1:193,0,198:.:.:.:.:.	25	22	26	22	30	16	22	28	30	21	CACTIG010000012.1	14105303	14117988	NC_048344.1|15437791|15450622|1|XM_034041941.2|XP_033897832.2|probable_28S_rRNA_(cytosine(4447)-C(5))-methyltransferase|12832	0
CACTIG010000012.1	15072341	.	A	T	228.399	SNP	AC=20;AD=7,23;ADF=3,9;ADR=4,14;AN=30;BQBZ=2.2112;DP=431;DP4=38,32,175,173;FS=0;MQ=60;MQ0F=0;RPBZ=-0.909181;SCBZ=0.456435;SGB=-0.692914;VDB=0.736257;SNP;TV	1/1:255,75,0:25:0:0,15:0,10:0,25	1/1:255,63,0:21:0:0,8:0,13:0,21	1/1:255,49,0:21:0:1,16:0,4:1,20	1/1:255,70,0:28:0:1,14:0,13:1,27	1/1:255,51,0:17:0:0,8:0,9:0,17	0/1:255,0,96:.:.:.:.:.	0/1:255,0,79:.:.:.:.:.	0/1:255,0,195:.:.:.:.:.	0/1:255,0,87:.:.:.:.:.	0/1:255,0,115:.:.:.:.:.	31	30	35	35	30	25	23	22	28	18	CACTIG010000012.1	15019759	15022299	NC_048344.1|14576958|14579508|-1|XM_034043237.2|XP_033899128.1|forkhead_box_protein_I3-like|2551	50042
CACTIG010000012.1	15073413	.	A	C	228.266	SNP	AC=20;AD=4,19;ADF=1,11;ADR=3,8;AN=30;BQBZ=0.21077;DP=426;DP4=29,32,189,162;FS=0;MQ=60;MQ0F=0;MQBZ=-0.196116;MQSBZ=1.03775;RPBZ=-1.41313;SCBZ=0.196116;SGB=-0.692067;VDB=0.840279;SNP;TV	1/1:255,60,0:20:0:0,10:0,10:0,20	1/1:255,102,0:34:0:0,20:0,14:0,34	1/1:255,63,0:21:0:0,10:0,11:0,21	1/1:255,96,0:32:0:0,25:0,7:0,32	1/1:255,44,0:27:0:1,12:0,14:1,26	0/1:255,0,166:.:.:.:.:.	0/1:255,0,73:.:.:.:.:.	0/1:180,0,117:.:.:.:.:.	0/1:255,0,133:.:.:.:.:.	0/1:255,0,48:.:.:.:.:.	37	40	16	28	25	20	36	21	34	27	CACTIG010000012.1	15019759	15022299	NC_048344.1|14576958|14579508|-1|XM_034043237.2|XP_033899128.1|forkhead_box_protein_I3-like|2551	51114
CACTIG010000012.1	15100593	.	A	C	228.393	SNP	AC=20;AD=14,13;ADF=6,11;ADR=8,2;AN=30;BQBZ=1.73931;DP=452;DP4=61,38,97,81;FS=0;MQ=59;MQ0F=0;MQBZ=2.23109;MQSBZ=0.471405;RPBZ=-0.759816;SCBZ=0.258199;SGB=-0.689466;VDB=0.385941;SNP;TV	1/1:255,48,0:16:0:0,6:0,10:0,16	1/1:221,27,0:9:0:0,3:0,6:0,9	1/1:255,36,0:16:0:0,8:1,7:1,15	1/1:255,36,0:16:0:1,5:0,10:1,15	1/1:255,11,0:16:0:0,7:1,8:1,15	0/1:230,0,134:.:.:.:.:.	0/1:211,0,189:.:.:.:.:.	0/1:127,0,105:.:.:.:.:.	0/1:213,0,206:.:.:.:.:.	0/1:212,0,239:.:.:.:.:.	29	39	24	32	38	27	21	22	39	31	CACTIG010000012.1	15019759	15022299	NC_048344.1|14576958|14579508|-1|XM_034043237.2|XP_033899128.1|forkhead_box_protein_I3-like|2551	78294
CACTIG010000012.1	15100711	.	G	A	225.417	SNP	AC=20;AD=6,20;ADF=3,8;ADR=3,12;AN=30;BQBZ=-1.67188;DP=367;DP4=26,40,132,154;FS=0;MQ=45;MQ0F=0;MQBZ=-2.67255;MQSBZ=-0.80829;RPBZ=-0.144816;SCBZ=0.606977;SGB=-0.689466;VDB=0.914349;SNP;TS	1/1:255,48,0:16:0:0,10:0,6:0,16	1/1:255,48,0:16:0:0,8:0,8:0,16	1/1:255,69,0:23:0:0,13:0,10:0,23	1/1:255,75,0:25:0:0,9:0,16:0,25	1/1:255,60,0:20:0:0,10:0,10:0,20	0/1:255,0,137:.:.:.:.:.	0/1:255,0,149:.:.:.:.:.	0/1:241,0,145:.:.:.:.:.	0/1:255,0,80:.:.:.:.:.	0/1:255,0,101:.:.:.:.:.	26	23	27	28	27	19	18	25	27	20	CACTIG010000012.1	15019759	15022299	NC_048344.1|14576958|14579508|-1|XM_034043237.2|XP_033899128.1|forkhead_box_protein_I3-like|2551	78412
CACTIG010000012.1	15101065	.	A	C	225.417	SNP	AC=20;AD=8,9;ADF=2,5;ADR=6,4;AN=30;BQBZ=0.928003;DP=344;DP4=24,64,89,152;FS=0;MQ=57;MQ0F=0;MQBZ=-1.85814;MQSBZ=0.473314;RPBZ=-0.251355;SCBZ=2.28599;SGB=-0.692717;VDB=0.298579;SNP;TV	1/1:255,69,0:23:0:0,12:0,11:0,23	1/1:255,69,0:23:0:0,7:0,16:0,23	1/1:255,39,0:13:0:0,5:0,8:0,13	1/1:255,57,0:19:0:0,6:0,13:0,19	1/1:255,45,0:15:0:0,7:0,8:0,15	0/1:255,0,191:.:.:.:.:.	0/1:250,0,131:.:.:.:.:.	0/1:255,0,184:.:.:.:.:.	0/1:255,0,158:.:.:.:.:.	0/1:204,0,158:.:.:.:.:.	29	26	26	27	17	24	24	15	21	16	CACTIG010000012.1	15019759	15022299	NC_048344.1|14576958|14579508|-1|XM_034043237.2|XP_033899128.1|forkhead_box_protein_I3-like|2551	78766
CACTIG010000012.1	15105799	.	C	A	181.416	SNP	AC=14;AD=2,3;ADF=0,0;ADR=2,3;AN=18;BQBZ=1;DP=53;DP4=1,8,9,34;FS=0;MQ=60;MQ0F=0;MQBZ=1.73205;MQSBZ=-0.645497;RPBZ=1.34164;SCBZ=1.09545;SGB=-0.651104;VDB=0.0149391;SNP;TV	1/1:211,24,0:8:0:0,1:0,7:0,8	1/1:130,18,0:6:0:0,0:0,6:0,6	1/1:97,15,0:5:0:0,3:0,2:0,5	1/1:198,21,0:7:0:0,2:0,5:0,7	1/1:95,3,0:4:0:1,1:0,2:1,3	./.:.:.:.:.:.:.	./.:.:.:.:.:.:.	./.:.:.:.:.:.:.	0/1:109,0,49:.:.:.:.:.	0/1:78,0,54:.:.:.:.:.	2	6	11	8	7	10	9	5	11	8	CACTIG010000012.1	15019759	15022299	NC_048344.1|14576958|14579508|-1|XM_034043237.2|XP_033899128.1|forkhead_box_protein_I3-like|2551	83500
CACTIG010000012.1	15106042	.	G	A	225.417	SNP	AC=20;AD=4,15;ADF=1,12;ADR=3,3;AN=30;BQBZ=1.11354;DP=259;DP4=28,22,148,53;FS=0;MQ=43;MQ0F=0;MQBZ=2.28854;MQSBZ=-2.58518;RPBZ=0;SCBZ=0.408248;SGB=-0.680642;VDB=0.987171;SNP;TS	1/1:227,12,0:14:12:0,10:2,2:2,12	1/1:255,57,0:19:0:0,11:0,8:0,19	1/1:255,45,0:15:0:0,9:0,6:0,15	1/1:255,75,0:25:0:0,18:0,7:0,25	1/1:252,36,0:12:0:0,9:0,3:0,12	0/1:176,0,204:.:.:.:.:.	0/1:205,0,79:.:.:.:.:.	0/1:204,0,85:.:.:.:.:.	0/1:170,0,84:.:.:.:.:.	0/1:224,0,78:.:.:.:.:.	22	22	17	12	20	17	19	17	26	14	CACTIG010000012.1	15019759	15022299	NC_048344.1|14576958|14579508|-1|XM_034043237.2|XP_033899128.1|forkhead_box_protein_I3-like|2551	83743
CACTIG010000012.1	15107108	.	A	AGTTTATT	228.383	INS	AC=20;AD=9,17;ADF=7,11;ADR=2,6;AN=30;BQBZ=-1.75432;DP=473;DP4=50,48,169,113;FS=0;IDV=23;IMF=0.676471;MQ=59;MQ0F=0;MQBZ=-0.992727;MQSBZ=-1.18851;RPBZ=-3.68323;SCBZ=-3.02574;SGB=-0.692717;VDB=0.107575;INDEL;INS;TV	1/1:255,33,0:25:8:2,8:0,15:2,23	1/1:255,46,0:27:3:2,14:0,11:2,25	1/1:255,45,0:25:0:2,17:0,6:2,23	1/1:255,69,0:28:0:0,12:1,15:1,27	1/1:241,12,0:15:17:0,10:3,2:3,12	0/1:217,0,233:.:.:.:.:.	0/1:255,0,128:.:.:.:.:.	0/1:255,0,196:.:.:.:.:.	0/1:255,0,11:.:.:.:.:.	0/1:255,0,140:.:.:.:.:.	34	32	38	26	40	34	31	28	34	30	CACTIG010000012.1	15019759	15022299	NC_048344.1|14576958|14579508|-1|XM_034043237.2|XP_033899128.1|forkhead_box_protein_I3-like|2551	84809
CACTIG010000012.1	15108594	.	A	G	228.222	SNP	AC=20;AD=8,16;ADF=3,11;ADR=5,5;AN=30;BQBZ=0.818397;DP=276;DP4=37,33,103,101;FS=0;MQ=50;MQ0F=0;MQBZ=-1.09004;MQSBZ=-1.09085;RPBZ=1.05607;SCBZ=0.213201;SGB=-0.690438;VDB=0.629315;SNP;TS	1/1:255,51,0:17:0:0,10:0,7:0,17	1/1:255,33,0:23:0:1,13:0,9:1,22	1/1:235,27,0:9:0:0,5:0,4:0,9	1/1:255,42,0:14:0:0,6:0,8:0,14	1/1:255,48,0:16:0:0,9:0,7:0,16	0/1:242,0,108:.:.:.:.:.	0/1:201,0,82:.:.:.:.:.	0/1:194,0,154:.:.:.:.:.	0/1:220,0,201:.:.:.:.:.	0/1:245,0,179:.:.:.:.:.	17	14	18	25	28	17	23	10	14	17	CACTIG010000012.1	15019759	15022299	NC_048344.1|14576958|14579508|-1|XM_034043237.2|XP_033899128.1|forkhead_box_protein_I3-like|2551	86295
CACTIG010000012.1	15109566	.	A	G	176.416	SNP	AC=20;AD=1,5;ADF=0,1;ADR=1,4;AN=30;BQBZ=1.11803;DP=129;DP4=12,20,17,76;FS=0;MQ=59;MQ0F=0;RPBZ=1.22474;SGB=-0.680642;VDB=0.281616;SNP;TS	1/1:188,33,0:12:0:0,1:0,10:0,11	1/1:92,9,0:3:0:0,0:0,3:0,3	1/1:86,9,0:3:0:0,0:0,3:0,3	1/1:206,33,0:11:0:0,0:0,11:0,11	1/1:204,24,0:8:0:0,2:0,6:0,8	0/1:109,0,104:.:.:.:.:.	0/1:145,0,16:.:.:.:.:.	0/1:153,0,137:.:.:.:.:.	0/1:115,0,101:.:.:.:.:.	0/1:127,0,19:.:.:.:.:.	9	7	15	9	7	12	3	4	13	8	CACTIG010000012.1	15019759	15022299	NC_048344.1|14576958|14579508|-1|XM_034043237.2|XP_033899128.1|forkhead_box_protein_I3-like|2551	87267
CACTIG010000012.1	15109567	.	G	T	176.416	SNP	AC=20;AD=1,5;ADF=0,1;ADR=1,4;AN=30;BQBZ=1.16417;DP=126;DP4=12,20,17,76;FS=0;MQ=59;MQ0F=0;RPBZ=1.22474;SGB=-0.680642;VDB=0.281616;SNP;TV	1/1:198,36,0:12:0:0,1:0,11:0,12	1/1:90,9,0:3:0:0,0:0,3:0,3	1/1:79,9,0:3:0:0,0:0,3:0,3	1/1:202,33,0:11:0:0,0:0,11:0,11	1/1:206,24,0:8:0:0,2:0,6:0,8	0/1:107,0,95:.:.:.:.:.	0/1:157,0,16:.:.:.:.:.	0/1:149,0,147:.:.:.:.:.	0/1:127,0,105:.:.:.:.:.	0/1:132,0,19:.:.:.:.:.	9	7	15	9	7	12	3	4	13	8	CACTIG010000012.1	15019759	15022299	NC_048344.1|14576958|14579508|-1|XM_034043237.2|XP_033899128.1|forkhead_box_protein_I3-like|2551	87268
CACTIG010000012.1	15109820	.	a	aGACCTGAAT	228.284	INS	AC=20;AD=9,14;ADF=5,11;ADR=4,3;AN=30;BQBZ=-1.7531;DP=447;DP4=45,31,175,116;FS=0;IDV=22;IMF=0.785714;MQ=59;MQ0F=0;MQBZ=-0.522233;MQSBZ=-1.18322;RPBZ=-1.9642;SCBZ=-4.04699;SGB=-0.692562;VDB=0.0207103;INDEL;INS;TV	1/1:255,4,0:24:0:1,12:1,10:2,22	1/1:255,35,0:25:3:2,14:0,9:2,23	1/1:255,21,0:21:0:2,9:1,9:3,18	1/1:255,84,0:28:0:0,19:0,9:0,28	1/1:255,39,0:23:0:0,15:1,7:1,22	0/1:255,0,25:.:.:.:.:.	0/1:255,0,112:.:.:.:.:.	0/1:255,0,30:.:.:.:.:.	0/1:255,0,188:.:.:.:.:.	0/1:255,0,187:.:.:.:.:.	24	28	27	41	31	27	36	26	39	32	CACTIG010000012.1	15019759	15022299	NC_048344.1|14576958|14579508|-1|XM_034043237.2|XP_033899128.1|forkhead_box_protein_I3-like|2551	87521
CACTIG010000012.1	15110222	.	A	G	225.417	SNP	AC=20;AD=3,18;ADF=0,1;ADR=3,17;AN=30;BQBZ=0;DP=265;DP4=10,34,51,164;FS=0;MQ=60;MQ0F=0;MQBZ=-0.392232;MQSBZ=-0.5;RPBZ=-0.154729;SCBZ=1.25213;SGB=-0.683931;VDB=0.00181326;SNP;TS	1/1:255,39,0:13:0:0,3:0,10:0,13	1/1:233,30,0:10:0:0,2:0,8:0,10	1/1:255,45,0:15:0:0,4:0,11:0,15	1/1:255,72,0:24:0:0,7:0,17:0,24	1/1:255,51,0:17:0:0,5:0,12:0,17	0/1:203,0,95:.:.:.:.:.	0/1:255,0,123:.:.:.:.:.	0/1:234,0,160:.:.:.:.:.	0/1:212,0,18:.:.:.:.:.	0/1:185,0,34:.:.:.:.:.	13	21	24	16	22	13	12	16	26	18	CACTIG010000012.1	15019759	15022299	NC_048344.1|14576958|14579508|-1|XM_034043237.2|XP_033899128.1|forkhead_box_protein_I3-like|2551	87923
CACTIG010000012.1	15112509	.	T	G	225.417	SNP	AC=20;AD=6,24;ADF=1,14;ADR=5,10;AN=30;BQBZ=0.27758;DP=456;DP4=42,32,176,165;FS=0;MQ=60;MQ0F=0;RPBZ=-0.180076;SCBZ=2.10324;SGB=-0.692914;VDB=0.211642;SNP;TV	1/1:255,75,0:25:0:0,12:0,13:0,25	1/1:255,81,0:27:0:0,13:0,14:0,27	1/1:255,75,0:25:0:0,14:0,11:0,25	1/1:255,108,0:36:0:0,16:0,20:0,36	1/1:255,84,0:28:0:0,13:0,15:0,28	0/1:255,0,185:.:.:.:.:.	0/1:255,0,141:.:.:.:.:.	0/1:255,0,115:.:.:.:.:.	0/1:255,0,130:.:.:.:.:.	0/1:255,0,66:.:.:.:.:.	34	28	27	32	31	28	29	27	41	33	CACTIG010000012.1	15019759	15022299	NC_048344.1|14576958|14579508|-1|XM_034043237.2|XP_033899128.1|forkhead_box_protein_I3-like|2551	90210
CACTIG010000012.1	15112743	.	C	A	225.417	SNP	AC=20;AD=8,31;ADF=4,16;ADR=4,15;AN=30;BQBZ=0.171487;DP=483;DP4=26,42,201,195;FS=0;MQ=59;MQ0F=0;MQBZ=-0.826199;MQSBZ=0.574598;RPBZ=0.203414;SCBZ=0.46291;SGB=-0.692831;VDB=0.3652;SNP;TV	1/1:255,72,0:24:0:0,8:0,16:0,24	1/1:255,66,0:22:0:0,14:0,8:0,22	1/1:255,78,0:26:0:0,12:0,14:0,26	1/1:255,81,0:27:0:0,14:0,13:0,27	1/1:255,99,0:33:0:0,15:0,18:0,33	0/1:255,0,70:.:.:.:.:.	0/1:255,0,50:.:.:.:.:.	0/1:255,0,120:.:.:.:.:.	0/1:255,0,133:.:.:.:.:.	0/1:255,0,121:.:.:.:.:.	36	31	27	39	45	24	25	28	28	35	CACTIG010000012.1	15019759	15022299	NC_048344.1|14576958|14579508|-1|XM_034043237.2|XP_033899128.1|forkhead_box_protein_I3-like|2551	90444
CACTIG010000012.1	15113330	.	T	C	225.417	SNP	AC=20;AD=7,19;ADF=3,16;ADR=4,3;AN=30;BQBZ=0.657412;DP=328;DP4=32,32,153,102;FS=0;MQ=60;MQ0F=0;MQSBZ=-1;RPBZ=0.2;SCBZ=0.730297;SGB=-0.692352;VDB=0.392253;SNP;TS	1/1:255,63,0:21:0:0,11:0,10:0,21	1/1:255,69,0:23:0:0,15:0,8:0,23	1/1:202,30,0:10:0:0,9:0,1:0,10	1/1:255,69,0:23:0:0,12:0,11:0,23	1/1:255,72,0:24:0:0,12:0,12:0,24	0/1:212,0,112:.:.:.:.:.	0/1:255,0,164:.:.:.:.:.	0/1:255,0,96:.:.:.:.:.	0/1:255,0,146:.:.:.:.:.	0/1:233,0,135:.:.:.:.:.	14	24	24	26	26	22	24	11	23	28	CACTIG010000012.1	15019759	15022299	NC_048344.1|14576958|14579508|-1|XM_034043237.2|XP_033899128.1|forkhead_box_protein_I3-like|2551	91031
CACTIG010000012.1	15113473	.	at	a	201.416	DEL	AC=20;AD=7,13;ADF=5,4;ADR=2,9;AN=30;DP=362;DP4=30,26,127,147;FS=0;IDV=22;IMF=0.956522;MQ=60;MQ0F=0;RPBZ=-1.66036;SCBZ=-4.69042;SGB=-0.692562;VDB=0.985007;DEL;INDEL;TV	1/1:210,66,0:22:0:0,10:0,12:0,22	1/1:162,63,0:21:0:0,9:0,12:0,21	1/1:189,45,0:15:0:0,5:0,10:0,15	1/1:231,84,0:28:0:0,12:0,16:0,28	1/1:174,36,0:12:0:0,5:0,7:0,12	0/1:135,0,60:.:.:.:.:.	0/1:113,0,16:.:.:.:.:.	0/1:131,0,44:.:.:.:.:.	0/1:177,0,14:.:.:.:.:.	0/1:98,0,68:.:.:.:.:.	22	19	39	27	24	24	24	15	32	12	CACTIG010000012.1	15019759	15022299	NC_048344.1|14576958|14579508|-1|XM_034043237.2|XP_033899128.1|forkhead_box_protein_I3-like|2551	91174
CACTIG010000012.1	15114065	.	C	T	225.417	SNP	AC=20;AD=11,17;ADF=7,7;ADR=4,10;AN=30;BQBZ=-0.455386;DP=423;DP4=34,46,169,159;FS=0;MQ=59;MQ0F=0;MQBZ=-0.522233;MQSBZ=0.727607;RPBZ=0.221539;SCBZ=0.612372;SGB=-0.690438;VDB=0.653299;SNP;TS	1/1:255,51,0:17:0:0,9:0,8:0,17	1/1:255,66,0:22:0:0,13:0,9:0,22	1/1:255,69,0:23:0:0,10:0,13:0,23	1/1:255,78,0:26:0:0,17:0,9:0,26	1/1:255,96,0:32:0:0,14:0,18:0,32	0/1:255,0,144:.:.:.:.:.	0/1:255,0,100:.:.:.:.:.	0/1:255,0,120:.:.:.:.:.	0/1:255,0,200:.:.:.:.:.	0/1:255,0,234:.:.:.:.:.	26	29	34	34	29	17	24	24	26	33	CACTIG010000012.1	15019759	15022299	NC_048344.1|14576958|14579508|-1|XM_034043237.2|XP_033899128.1|forkhead_box_protein_I3-like|2551	91766
CACTIG010000012.1	15114338	.	G	T	225.417	SNP	AC=20;AD=4,16;ADF=3,7;ADR=1,9;AN=30;BQBZ=1.11396;DP=352;DP4=36,24,103,175;FS=0;MQ=60;MQ0F=0;MQBZ=-0.790569;MQSBZ=0.92582;RPBZ=0;SGB=-0.692831;VDB=0.970769;SNP;TV	1/1:255,72,0:24:0:0,11:0,13:0,24	1/1:255,57,0:19:0:0,9:0,10:0,19	1/1:255,72,0:24:0:0,8:0,16:0,24	1/1:255,96,0:32:0:0,13:0,19:0,32	1/1:255,63,0:21:0:0,8:0,13:0,21	0/1:183,0,113:.:.:.:.:.	0/1:255,0,28:.:.:.:.:.	0/1:255,0,164:.:.:.:.:.	0/1:255,0,189:.:.:.:.:.	0/1:255,0,42:.:.:.:.:.	16	25	25	32	23	24	20	24	34	21	CACTIG010000012.1	15019759	15022299	NC_048344.1|14576958|14579508|-1|XM_034043237.2|XP_033899128.1|forkhead_box_protein_I3-like|2551	92039
CACTIG010000012.1	15114744	.	T	TGCA	228.407	INS	AC=20;AD=4,12;ADF=3,11;ADR=1,1;AN=30;BQBZ=-1.74866;DP=363;DP4=42,29,199,78;FS=0;IDV=22;IMF=0.916667;MQ=60;MQ0F=0;RPBZ=0;SCBZ=-3.31662;SGB=-0.692562;VDB=0.0269773;INDEL;INS;TV	1/1:255,56,0:23:0:0,14:1,8:1,22	1/1:255,56,0:23:0:0,14:1,8:1,22	1/1:255,39,0:13:0:0,6:0,7:0,13	1/1:255,31,0:14:0:0,7:1,6:1,13	1/1:255,75,0:25:0:0,20:0,5:0,25	0/1:255,0,119:.:.:.:.:.	0/1:255,0,31:.:.:.:.:.	0/1:255,0,173:.:.:.:.:.	0/1:255,0,149:.:.:.:.:.	0/1:255,0,163:.:.:.:.:.	20	23	44	31	17	25	25	15	16	26	CACTIG010000012.1	15019759	15022299	NC_048344.1|14576958|14579508|-1|XM_034043237.2|XP_033899128.1|forkhead_box_protein_I3-like|2551	92445
CACTIG010000012.1	15114982	.	A	G	225.417	SNP	AC=20;AD=13,18;ADF=3,11;ADR=10,7;AN=30;BQBZ=-1.20287;DP=456;DP4=30,54,190,165;FS=0;MQ=60;MQ0F=0;RPBZ=-1.12891;SCBZ=-1.81265;SGB=-0.693132;VDB=0.839332;SNP;TS	1/1:255,102,0:34:0:0,21:0,13:0,34	1/1:255,78,0:26:0:0,15:0,11:0,26	1/1:255,66,0:22:0:0,14:0,8:0,22	1/1:255,99,0:33:0:0,16:0,17:0,33	1/1:255,84,0:28:0:0,12:0,16:0,28	0/1:255,0,134:.:.:.:.:.	0/1:255,0,105:.:.:.:.:.	0/1:255,0,164:.:.:.:.:.	0/1:255,0,109:.:.:.:.:.	0/1:255,0,219:.:.:.:.:.	34	29	29	35	31	35	29	24	37	28	CACTIG010000012.1	15019759	15022299	NC_048344.1|14576958|14579508|-1|XM_034043237.2|XP_033899128.1|forkhead_box_protein_I3-like|2551	92683
CACTIG010000012.1	15115393	.	T	C	225.417	SNP	AC=20;AD=4,8;ADF=0,3;ADR=4,5;AN=30;BQBZ=0.174485;DP=227;DP4=8,36,51,114;FS=0;MQ=60;MQ0F=0;RPBZ=0.857143;SCBZ=1.08012;SGB=-0.691153;VDB=0.566795;SNP;TS	1/1:255,54,0:18:0:0,3:0,15:0,18	1/1:255,54,0:18:0:0,7:0,11:0,18	1/1:240,36,0:12:0:0,3:0,9:0,12	1/1:238,30,0:10:0:0,2:0,8:0,10	1/1:242,27,0:9:0:0,4:0,5:0,9	0/1:144,0,152:.:.:.:.:.	0/1:194,0,162:.:.:.:.:.	0/1:255,0,14:.:.:.:.:.	0/1:242,0,58:.:.:.:.:.	0/1:191,0,69:.:.:.:.:.	13	17	18	14	15	25	21	17	12	9	CACTIG010000012.1	15019759	15022299	NC_048344.1|14576958|14579508|-1|XM_034043237.2|XP_033899128.1|forkhead_box_protein_I3-like|2551	93094
CACTIG010000012.1	15116476	.	A	T	225.417	SNP	AC=20;AD=15,7;ADF=8,3;ADR=7,4;AN=30;BQBZ=0.709083;DP=301;DP4=54,46,92,97;FS=0;MQ=59;MQ0F=0;MQBZ=-0.942809;MQSBZ=-0.060403;RPBZ=-0.766973;SCBZ=1.73845;SGB=-0.692831;VDB=0.58657;SNP;TV	1/1:255,72,0:24:0:0,13:0,11:0,24	1/1:223,33,0:11:0:0,3:0,8:0,11	1/1:255,39,0:13:0:0,4:0,9:0,13	1/1:255,51,0:17:0:0,10:0,7:0,17	1/1:255,42,0:14:0:0,8:0,6:0,14	0/1:180,0,94:.:.:.:.:.	0/1:199,0,171:.:.:.:.:.	0/1:255,0,255:.:.:.:.:.	0/1:255,0,175:.:.:.:.:.	0/1:148,0,255:.:.:.:.:.	12	18	32	26	25	25	13	16	17	15	CACTIG010000012.1	15019759	15022299	NC_048344.1|14576958|14579508|-1|XM_034043237.2|XP_033899128.1|forkhead_box_protein_I3-like|2551	94177
CACTIG010000012.1	15117353	.	A	G	225.417	SNP	AC=18;AD=7,3;ADF=4,2;ADR=3,1;AN=26;BQBZ=0.591608;DP=119;DP4=26,18,23,49;FS=0;MQ=60;MQ0F=0;RPBZ=-0.774597;SCBZ=2.41523;SGB=-0.680642;VDB=0.121494;SNP;TS	1/1:218,36,0:12:0:0,1:0,11:0,12	1/1:184,18,0:6:0:0,3:0,3:0,6	1/1:255,33,0:11:0:0,6:0,5:0,11	1/1:196,24,0:8:0:0,1:0,7:0,8	1/1:173,21,0:7:0:0,2:0,5:0,7	0/1:75,0,129:.:.:.:.:.	./.:.:.:.:.:.:.	0/1:130,0,193:.:.:.:.:.	0/1:51,0,54:.:.:.:.:.	0/1:73,0,176:.:.:.:.:.	8	9	14	5	10	12	7	11	8	7	CACTIG010000012.1	15019759	15022299	NC_048344.1|14576958|14579508|-1|XM_034043237.2|XP_033899128.1|forkhead_box_protein_I3-like|2551	95054
CACTIG010000012.1	15117451	.	A	G	203.417	SNP	AC=20;AD=2,3;ADF=1,1;ADR=1,2;AN=30;BQBZ=1.22474;DP=163;DP4=24,34,39,47;FS=0;MQ=45;MQ0F=0;MQBZ=-0.707107;MQSBZ=-1.98608;RPBZ=-1.22474;SCBZ=0.707107;SGB=-0.670168;VDB=0.0110326;SNP;TS	1/1:233,30,0:10:0:0,3:0,7:0,10	1/1:102,12,0:4:0:0,4:0,0:0,4	1/1:172,18,0:7:0:0,3:0,3:0,6	1/1:94,9,0:3:0:0,2:0,1:0,3	1/1:184,21,0:7:0:0,5:0,2:0,7	0/1:52,0,17:.:.:.:.:.	0/1:69,0,250:.:.:.:.:.	0/1:189,0,243:.:.:.:.:.	0/1:212,0,33:.:.:.:.:.	0/1:89,0,20:.:.:.:.:.	8	18	23	11	8	11	4	7	4	8	CACTIG010000012.1	15019759	15022299	NC_048344.1|14576958|14579508|-1|XM_034043237.2|XP_033899128.1|forkhead_box_protein_I3-like|2551	95152
CACTIG010000012.1	15117472	.	A	C	207.417	SNP	AC=18;AD=4,3;ADF=1,1;ADR=3,2;AN=26;BQBZ=-0.79828;DP=152;DP4=29,31,39,48;FS=0;MQ=44;MQ0F=0;MQBZ=-1.70233;MQSBZ=-1.96737;RPBZ=2.26594;SCBZ=0.425583;SGB=-0.670168;VDB=0.409296;SNP;TV	1/1:188,30,0:10:0:0,3:0,7:0,10	1/1:103,12,0:4:0:0,4:0,0:0,4	1/1:194,24,0:8:0:0,4:0,4:0,8	1/1:102,9,0:3:0:0,2:0,1:0,3	1/1:237,24,0:8:0:0,6:0,2:0,8	./.:.:.:.:.:.:.	0/1:81,0,240:.:.:.:.:.	0/1:161,0,197:.:.:.:.:.	0/1:211,0,67:.:.:.:.:.	0/1:69,0,101:.:.:.:.:.	8	17	24	14	7	11	4	8	4	11	CACTIG010000012.1	15019759	15022299	NC_048344.1|14576958|14579508|-1|XM_034043237.2|XP_033899128.1|forkhead_box_protein_I3-like|2551	95173
CACTIG010000012.1	15117587	.	C	T	225.421	SNP	AC=20;AD=5,7;ADF=2,5;ADR=3,2;AN=30;BQBZ=0;DP=250;DP4=38,32,126,54;FS=0;MQ=60;MQ0F=0;RPBZ=-0.646208;SCBZ=-1.1547;SGB=-0.690438;VDB=0.854591;SNP;TS	1/1:255,48,0:17:0:0,13:0,3:0,16	1/1:255,54,0:18:0:0,13:0,5:0,18	1/1:255,75,0:25:0:0,13:0,12:0,25	1/1:255,42,0:14:0:0,10:0,4:0,14	1/1:255,42,0:14:0:0,8:0,6:0,14	0/1:142,0,126:.:.:.:.:.	0/1:113,0,200:.:.:.:.:.	0/1:248,0,159:.:.:.:.:.	0/1:190,0,124:.:.:.:.:.	0/1:139,0,120:.:.:.:.:.	14	16	26	14	12	18	18	28	14	18	CACTIG010000012.1	15019759	15022299	NC_048344.1|14576958|14579508|-1|XM_034043237.2|XP_033899128.1|forkhead_box_protein_I3-like|2551	95288
CACTIG010000012.1	15117647	.	T	G	225.417	SNP	AC=20;AD=2,2;ADF=1,1;ADR=1,1;AN=30;BQBZ=-0.208983;DP=267;DP4=28,30,138,62;FS=0;MQ=60;MQ0F=0;RPBZ=2.16772;SGB=-0.692914;VDB=0.201109;SNP;TV	1/1:255,75,0:25:0:0,22:0,3:0,25	1/1:255,48,0:16:0:0,10:0,6:0,16	1/1:255,57,0:19:0:0,9:0,10:0,19	1/1:255,60,0:20:0:0,16:0,4:0,20	1/1:255,42,0:14:0:0,9:0,5:0,14	0/1:225,0,206:.:.:.:.:.	0/1:179,0,162:.:.:.:.:.	0/1:255,0,94:.:.:.:.:.	0/1:232,0,113:.:.:.:.:.	0/1:57,0,62:.:.:.:.:.	20	17	30	17	4	28	17	20	20	15	CACTIG010000012.1	15019759	15022299	NC_048344.1|14576958|14579508|-1|XM_034043237.2|XP_033899128.1|forkhead_box_protein_I3-like|2551	95348
CACTIG010000012.1	15799779	.	T	C	228.22	SNP	AC=20;AD=6,7;ADF=1,3;ADR=5,4;AN=30;BQBZ=1.93157;DP=191;DP4=24,26,78,56;FS=0;MQ=55;MQ0F=0;MQBZ=-0.594964;MQSBZ=0.258199;RPBZ=0.695608;SCBZ=0.267261;SGB=-0.616816;VDB=0.572009;SNP;TS	1/1:160,18,0:6:0:0,3:0,3:0,6	1/1:255,18,0:15:0:1,6:0,8:1,14	1/1:255,45,0:15:0:0,10:0,5:0,15	1/1:255,33,0:11:0:0,6:0,5:0,11	1/1:252,2,0:13:0:1,7:0,5:1,12	0/1:182,0,40:.:.:.:.:.	0/1:167,0,176:.:.:.:.:.	0/1:209,0,115:.:.:.:.:.	0/1:137,0,96:.:.:.:.:.	0/1:173,0,159:.:.:.:.:.	10	16	17	9	20	6	17	16	13	13	CACTIG010000012.1	15431346	15771162	NC_048344.1|13816580|14159639|-1|XM_034043295.2|XP_033899186.2|cadherin_13,_H-cadherin_(heart),_transcript_variant_X2|343060	28617
CACTIG010000012.1	16095880	.	A	T	223.417	SNP	AC=20;AD=4,10;ADF=2,4;ADR=2,6;AN=30;BQBZ=1.22474;DP=258;DP4=14,20,76,53;FS=0;MQ=60;MQ0F=0;RPBZ=-1.22474;SGB=-0.676189;VDB=0.00878963;SNP;TV	1/1:253,33,0:11:0:0,5:0,6:0,11	1/1:144,18,0:6:0:0,3:0,3:0,6	1/1:219,33,0:11:0:0,7:0,4:0,11	1/1:229,30,0:10:0:0,6:0,4:0,10	1/1:171,21,0:7:0:0,3:0,4:0,7	0/1:56,0,12:.:.:.:.:.	0/1:243,0,46:.:.:.:.:.	0/1:212,0,43:.:.:.:.:.	0/1:158,0,41:.:.:.:.:.	0/1:196,0,51:.:.:.:.:.	10	22	23	10	23	19	16	15	18	19	CACTIG010000012.1	16046582	16097723	NC_048344.1|13481235|13535716|1|XM_034043021.2|XP_033898912.2|transport_and_golgi_organization_6_homolog_(Drosophila),_transcript_variant_X1|54482	0
CACTIG010000012.1	16097703	.	T	G	228.188	SNP	AC=20;AD=11,19;ADF=7,7;ADR=4,12;AN=30;BQBZ=2.10381;DP=320;DP4=40,28,115,115;FS=0;MQ=56;MQ0F=0;MQBZ=-0.77804;MQSBZ=-1.45941;RPBZ=-2.28545;SCBZ=-3.16228;SGB=-0.692067;VDB=0.0985909;SNP;TV	1/1:255,60,0:20:0:0,14:0,6:0,20	1/1:255,24,0:22:7:0,12:2,8:2,20	1/1:255,45,0:15:0:0,9:0,6:0,15	1/1:255,39,0:13:0:0,7:0,6:0,13	1/1:255,54,0:18:0:0,7:0,11:0,18	0/1:154,0,98:.:.:.:.:.	0/1:246,0,48:.:.:.:.:.	0/1:255,0,114:.:.:.:.:.	0/1:255,0,129:.:.:.:.:.	0/1:255,0,216:.:.:.:.:.	12	21	25	26	32	21	27	16	16	19	CACTIG010000012.1	16046582	16097723	NC_048344.1|13481235|13535716|1|XM_034043021.2|XP_033898912.2|transport_and_golgi_organization_6_homolog_(Drosophila),_transcript_variant_X1|54482	0
CACTIG010000012.1	16097782	.	C	G	228.283	SNP	AC=20;AD=14,18;ADF=5,8;ADR=9,10;AN=30;BQBZ=-0.936045;DP=331;DP4=30,46,112,128;FS=0;MQ=59;MQ0F=0;MQBZ=-0.301511;MQSBZ=-0.877058;RPBZ=-0.209075;SCBZ=0.545096;SGB=-0.692717;VDB=0.245444;SNP;TV	1/1:255,69,0:23:0:0,10:0,13:0,23	1/1:255,2,0:24:0:0,7:2,15:2,22	1/1:255,66,0:22:0:0,9:0,13:0,22	1/1:255,60,0:20:0:0,8:0,12:0,20	1/1:255,63,0:21:0:0,16:0,5:0,21	0/1:203,0,91:.:.:.:.:.	0/1:255,0,150:.:.:.:.:.	0/1:252,0,103:.:.:.:.:.	0/1:255,0,136:.:.:.:.:.	0/1:255,0,236:.:.:.:.:.	18	22	19	22	34	24	24	24	22	25	CACTIG010000012.1	16046582	16097723	NC_048344.1|13481235|13535716|1|XM_034043021.2|XP_033898912.2|transport_and_golgi_organization_6_homolog_(Drosophila),_transcript_variant_X1|54482	59
CACTIG010000012.1	16097946	.	T	G	218.162	SNP	AC=20;AD=12,15;ADF=6,6;ADR=6,9;AN=30;BQBZ=2.23198;DP=280;DP4=48,36,98,86;FS=0;MQ=60;MQ0F=0;MQBZ=-1.01145;MQSBZ=-0.597703;RPBZ=0;SCBZ=0.447214;SGB=-0.683931;VDB=0.252301;SNP;TV	1/1:232,25,0:15:0:1,8:1,5:2,13	1/1:147,18,0:12:0:1,4:1,6:2,10	1/1:234,32,0:18:3:2,9:0,7:2,16	1/1:245,18,0:25:0:4,10:3,8:7,18	1/1:169,12,0:12:3:0,3:3,6:3,9	0/1:92,0,53:.:.:.:.:.	0/1:161,0,73:.:.:.:.:.	0/1:212,0,83:.:.:.:.:.	0/1:206,0,77:.:.:.:.:.	0/1:189,0,202:.:.:.:.:.	7	22	20	21	27	15	13	19	27	14	CACTIG010000012.1	16046582	16097723	NC_048344.1|13481235|13535716|1|XM_034043021.2|XP_033898912.2|transport_and_golgi_organization_6_homolog_(Drosophila),_transcript_variant_X1|54482	223
CACTIG010000012.1	16419808	.	T	A	225.421	SNP	AC=20;AD=6,9;ADF=3,4;ADR=3,5;AN=30;BQBZ=-1.04157;DP=261;DP4=24,36,104,84;FS=0;MQ=48;MQ0F=0;MQBZ=-1.0533;MQSBZ=-0.927914;RPBZ=0.436051;SCBZ=0.630126;SGB=-0.676189;VDB=0.0710039;SNP;TV	1/1:211,0,1:12:0:0,5:1,6:1,11	1/1:255,75,0:25:0:0,18:0,7:0,25	1/1:255,45,0:15:0:0,9:0,6:0,15	1/1:255,51,0:18:0:0,6:0,11:0,17	1/1:171,21,0:7:0:0,3:0,4:0,7	0/1:255,0,49:.:.:.:.:.	0/1:196,0,183:.:.:.:.:.	0/1:189,0,85:.:.:.:.:.	0/1:126,0,128:.:.:.:.:.	0/1:223,0,136:.:.:.:.:.	19	21	20	13	17	13	27	17	18	11	CACTIG010000012.1	16322079	16335624	NC_048344.1|13192180|13206019|1|XM_034904670.1|XP_034760561.1|zinc_finger_protein_469-like|13840	84184
CACTIG010000012.1	18282094	.	A	G	225.417	SNP	AC=20;AD=4,21;ADF=4,10;ADR=0,11;AN=30;BQBZ=0;DP=445;DP4=41,27,169,197;FS=0;MQ=60;MQ0F=0;RPBZ=0.21838;SCBZ=0.722315;SGB=-0.692976;VDB=0.722423;SNP;TS	1/1:255,78,0:26:0:0,10:0,16:0,26	1/1:255,87,0:29:0:0,13:0,16:0,29	1/1:255,78,0:26:0:0,9:0,17:0,26	1/1:255,96,0:32:0:0,18:0,14:0,32	1/1:255,0,5:23:3:1,15:1,6:2,21	0/1:255,0,206:.:.:.:.:.	0/1:255,0,91:.:.:.:.:.	0/1:255,0,73:.:.:.:.:.	0/1:255,0,100:.:.:.:.:.	0/1:255,0,48:.:.:.:.:.	35	25	36	32	25	28	30	28	34	24	CACTIG010000012.1	18294784	18312110	NC_048344.1|11198906|11216137|1|XM_034042301.2|XP_033898192.2|C-type_lectin_domain_family_18_member_C-like|17232	12690
CACTIG010000012.1	19287053	.	T	G	228.259	SNP	AC=20;AD=8,28;ADF=2,14;ADR=6,14;AN=30;BQBZ=-0.535853;DP=456;DP4=37,42,183,185;FS=0;MQ=60;MQ0F=0;RPBZ=0.964384;SGB=-0.693054;VDB=0.132269;SNP;TV	1/1:255,84,0:28:0:0,12:0,16:0,28	1/1:255,75,0:25:0:0,11:0,14:0,25	1/1:255,81,0:27:0:0,16:0,11:0,27	1/1:255,114,0:38:0:0,18:0,20:0,38	1/1:255,44,0:27:0:1,16:0,10:1,26	0/1:255,0,147:.:.:.:.:.	0/1:255,0,150:.:.:.:.:.	0/1:255,0,142:.:.:.:.:.	0/1:255,0,75:.:.:.:.:.	0/1:255,0,118:.:.:.:.:.	29	28	35	29	37	28	28	27	40	27	CACTIG010000012.1	19279181	19287698	NC_048344.1|10226566|10235079|1|XM_034043182.2|XP_033899073.2|zinc_finger_protein_276-like|8514	0
CACTIG010000012.1	19287257	.	T	A	225.417	SNP	AC=20;AD=6,21;ADF=3,7;ADR=3,14;AN=30;BQBZ=-1.49374;DP=442;DP4=40,26,189,179;FS=0;MQ=60;MQ0F=0;RPBZ=-1.26701;SCBZ=0.551677;SGB=-0.692067;VDB=0.435737;SNP;TV	1/1:255,60,0:20:0:0,10:0,10:0,20	1/1:255,105,0:35:0:0,20:0,15:0,35	1/1:255,57,0:19:0:0,11:0,8:0,19	1/1:255,90,0:30:0:0,19:0,11:0,30	1/1:255,108,0:36:0:0,19:0,17:0,36	0/1:255,0,183:.:.:.:.:.	0/1:255,0,47:.:.:.:.:.	0/1:255,0,151:.:.:.:.:.	0/1:255,0,76:.:.:.:.:.	0/1:255,0,108:.:.:.:.:.	27	33	33	32	27	24	35	19	31	38	CACTIG010000012.1	19279181	19287698	NC_048344.1|10226566|10235079|1|XM_034043182.2|XP_033899073.2|zinc_finger_protein_276-like|8514	0
CACTIG010000012.1	22494964	.	T	C	225.417	SNP	AC=20;AD=9,4;ADF=3,1;ADR=6,3;AN=30;BQBZ=0.296056;DP=174;DP4=16,30,34,84;FS=0;MQ=60;MQ0F=0;MQSBZ=-0.522233;RPBZ=1.94145;SCBZ=0.615457;SGB=-0.688148;VDB=0.0377836;SNP;TS	1/1:245,45,0:15:0:0,3:0,12:0,15	1/1:255,42,0:14:0:0,3:0,11:0,14	1/1:165,24,0:8:0:0,0:0,8:0,8	1/1:226,30,0:10:0:0,2:0,8:0,10	1/1:255,45,0:15:0:0,6:0,9:0,15	0/1:208,0,51:.:.:.:.:.	0/1:95,0,175:.:.:.:.:.	0/1:79,0,47:.:.:.:.:.	0/1:191,0,31:.:.:.:.:.	0/1:93,0,200:.:.:.:.:.	16	19	13	12	17	17	21	15	17	17	CACTIG010000012.1	22489519	22550042	NC_048344.1|6905569|6965990|-1|XM_034041655.2|XP_033897546.2|piezo-type_mechanosensitive_ion_channel_component_1-like|60422	0
CACTIG010000012.1	22570527	.	A	C,T	225.417	SNP	AC=20,4;AD=7,28,6;ADF=2,10,3;ADR=5,18,3;AN=30;BQBZ=1.98513;DP=389;DP4=16,22,149,196;FS=0;MQ=59;MQ0F=0;MQBZ=-0.641689;MQSBZ=-0.866025;RPBZ=-0.604536;SCBZ=-0.358877;SGB=-0.692352;VDB=0.00320996;SNP;TV	1/1:255,63,0,.,.,.:21:0:0,9,.:0,12,.:0,21,.	1/1:255,66,0,.,.,.:22:0:0,10,.:0,12,.:0,22,.	1/1:255,45,0,.,.,.:15:0:0,7,.:0,8,.:0,15,.	1/1:255,90,0,.,.,.:30:0:0,16,.:0,14,.:0,30,.	1/1:255,87,0,.,.,.:29:0:0,17,.:0,12,.:0,29,.	1/2:255,149,89,255,0,255:.:.:.:.:.	0/1:255,0,133,.,.,.:.:.:.:.:.	1/2:255,171,129,253,0,235:.:.:.:.:.	0/1:255,0,79,.,.,.:.:.:.:.:.	0/1:255,0,109,.,.,.:.:.:.:.:.	27	26	20	29	37	21	22	16	34	30	CACTIG010000012.1	22558702	22571703	NC_048344.1|6884175|6896907|-1|XM_034041680.2|XP_033897571.1|E3_ubiquitin-protein_ligase_RNF166-like,_transcript_variant_X3|12733	0
CACTIG010000012.1	22773684	.	A	T	228.23	SNP	AC=20;AD=4,23;ADF=1,12;ADR=3,11;AN=30;BQBZ=-1.52122;DP=408;DP4=80,41,146,121;FS=0;MQ=60;MQ0F=0;MQBZ=1.11901;MQSBZ=-1.70931;RPBZ=0.981611;SCBZ=1.34549;SGB=-0.692562;VDB=0.119766;SNP;TV	1/1:255,31,0:23:0:0,11:1,11:1,22	1/1:255,96,0:32:0:0,26:0,6:0,32	1/1:255,54,0:18:0:0,11:0,7:0,18	1/1:255,57,0:19:0:0,8:0,11:0,19	1/1:255,72,0:24:0:0,12:0,12:0,24	0/1:254,0,250:.:.:.:.:.	0/1:176,0,255:.:.:.:.:.	0/1:232,0,211:.:.:.:.:.	0/1:255,0,221:.:.:.:.:.	0/1:255,0,53:.:.:.:.:.	31	30	27	32	29	28	33	19	21	27	CACTIG010000012.1	22766067	22788088	NC_048344.1|6665162|6687224|-1|XM_034042903.2|XP_033898794.1|cytoplasmic_dynein_1_light_intermediate_chain_2,_transcript_variant_X1|22063	0
CACTIG010000012.1	22845077	.	C	T	225.417	SNP	AC=20;AD=7,20;ADF=2,12;ADR=5,8;AN=30;BQBZ=-1.86795;DP=482;DP4=40,36,219,170;FS=0;MQ=59;MQ0F=0;MQBZ=-0.790569;MQSBZ=-1.12546;RPBZ=0.0826528;SGB=-0.693132;VDB=0.966028;SNP;TS	1/1:255,102,0:34:0:0,19:0,15:0,34	1/1:255,63,0:21:0:0,11:0,10:0,21	1/1:255,60,0:20:0:0,12:0,8:0,20	1/1:255,151,0:50:0:0,29:0,21:0,50	1/1:255,84,0:28:0:0,16:0,12:0,28	0/1:255,0,105:.:.:.:.:.	0/1:255,0,255:.:.:.:.:.	0/1:255,0,79:.:.:.:.:.	0/1:255,0,65:.:.:.:.:.	0/1:255,0,132:.:.:.:.:.	21	40	40	32	27	35	23	22	52	30	CACTIG010000012.1	22845565	22886754	NC_048344.1|6566404|6607565|1|XM_034042198.2|XP_033898089.1|protein_BEAN1|41162	488
CACTIG010000012.1	22845081	.	C	T	225.417	SNP	AC=20;AD=8,21;ADF=2,12;ADR=6,9;AN=30;BQBZ=-0.935111;DP=484;DP4=42,36,220,168;FS=0;MQ=59;MQ0F=0;MQBZ=-0.816497;MQSBZ=-1.20894;RPBZ=0.472989;SGB=-0.69312;VDB=0.852138;SNP;TS	1/1:255,96,0:32:0:0,19:0,13:0,32	1/1:255,63,0:21:0:0,11:0,10:0,21	1/1:255,66,0:22:0:0,14:0,8:0,22	1/1:255,157,0:52:0:0,30:0,22:0,52	1/1:255,75,0:25:0:0,14:0,11:0,25	0/1:255,0,71:.:.:.:.:.	0/1:255,0,255:.:.:.:.:.	0/1:255,0,75:.:.:.:.:.	0/1:255,0,78:.:.:.:.:.	0/1:255,0,142:.:.:.:.:.	21	42	41	30	29	33	22	23	55	26	CACTIG010000012.1	22845565	22886754	NC_048344.1|6566404|6607565|1|XM_034042198.2|XP_033898089.1|protein_BEAN1|41162	484
CACTIG010000012.1	22845379	.	TA	T	228.408	DEL	AC=20;AD=12,25;ADF=5,14;ADR=7,11;AN=30;DP=520;DP4=49,56,211,191;FS=0;IDV=33;IMF=0.868421;MQ=58;MQ0F=0;MQBZ=-0.810708;MQSBZ=0.784409;RPBZ=-0.713111;SCBZ=-3.6833;SGB=-0.693127;VDB=0.981528;DEL;INDEL;TV	1/1:255,78,0:35:8:0,20:2,13:2,33	1/1:255,50,0:21:0:1,12:0,8:1,20	1/1:255,45,0:15:0:0,7:0,8:0,15	1/1:255,104,0:40:0:0,20:1,19:1,39	1/1:255,70,0:28:0:0,14:1,13:1,27	0/1:255,0,12:.:.:.:.:.	0/1:255,0,65:.:.:.:.:.	0/1:196,0,112:.:.:.:.:.	0/1:255,0,49:.:.:.:.:.	0/1:255,0,91:.:.:.:.:.	28	39	40	44	38	39	23	15	42	30	CACTIG010000012.1	22845565	22886754	NC_048344.1|6566404|6607565|1|XM_034042198.2|XP_033898089.1|protein_BEAN1|41162	186
CACTIG010000012.1	22851092	.	C	A	225.417	SNP	AC=20;AD=12,33;ADF=3,13;ADR=9,20;AN=30;BQBZ=1.06644;DP=427;DP4=46,50,155,166;FS=0;MQ=60;MQ0F=0;RPBZ=-0.423064;SCBZ=1.1767;SGB=-0.686358;VDB=0.72958;SNP;TV	1/1:255,42,0:14:0:0,8:0,6:0,14	1/1:255,90,0:30:0:0,9:0,21:0,30	1/1:255,69,0:23:0:0,14:0,9:0,23	1/1:255,75,0:25:0:0,13:0,12:0,25	1/1:255,87,0:29:0:0,15:0,14:0,29	0/1:255,0,117:.:.:.:.:.	0/1:255,0,130:.:.:.:.:.	0/1:230,0,255:.:.:.:.:.	0/1:255,0,47:.:.:.:.:.	0/1:255,0,155:.:.:.:.:.	22	26	34	28	47	16	32	23	28	33	CACTIG010000012.1	22845565	22886754	NC_048344.1|6566404|6607565|1|XM_034042198.2|XP_033898089.1|protein_BEAN1|41162	0
CACTIG010000012.1	22852787	.	C	T	194.421	SNP	AC=20;AD=7,12;ADF=1,11;ADR=6,1;AN=30;BQBZ=1.73205;DP=289;DP4=39,51,146,26;FS=0;MQ=37;MQ0F=0;MQBZ=1.55543;MQSBZ=-2.34738;RPBZ=0.29277;SCBZ=0.607988;SGB=-0.688148;VDB=0.977073;SNP;TS	1/1:210,45,0:15:0:0,14:0,1:0,15	1/1:133,9,0:6:0:0,3:1,2:1,5	1/1:224,45,0:16:0:0,13:0,2:0,15	1/1:210,37,0:20:18:0,17:2,1:2,18	1/1:162,6,0:18:12:1,14:2,1:3,15	0/1:66,0,139:.:.:.:.:.	0/1:145,0,121:.:.:.:.:.	0/1:92,0,203:.:.:.:.:.	0/1:132,0,150:.:.:.:.:.	0/1:157,0,21:.:.:.:.:.	13	18	22	21	21	15	6	17	20	21	CACTIG010000012.1	22845565	22886754	NC_048344.1|6566404|6607565|1|XM_034042198.2|XP_033898089.1|protein_BEAN1|41162	0
CACTIG010000012.1	22854996	.	c	cA,cG	225.417	INS	AC=14,6;AD=0,3,2;ADF=0,2,2;ADR=0,1,0;AN=26;BQBZ=-1.54919;DP=117;DP4=10,11,46,34;FS=0;IDV=8;IMF=0.8;MQ=41;MQ0F=0;MQBZ=-0.135141;MQSBZ=0.511682;RPBZ=0;SCBZ=0.707107;SGB=-0.662043;VDB=0.714505;INDEL;INS;TV	1/1:102,27,0,.,.,.:9:0:0,4,.:0,5,.:0,9,.	1/1:222,24,0,.,.,.:8:0:0,4,.:0,4,.:0,8,.	1/1:187,18,0,.,.,.:10:0:0,3,.:1,6,.:1,9,.	1/1:255,57,0,.,.,.:19:0:0,16,.:0,3,.:0,19,.	1/1:77,15,0,.,.,.:5:0:0,1,.:0,4,.:0,5,.	0/1:100,0,79,.,.,.:.:.:.:.:.	./.:.:.:.:.:.:.	0/2:84,.,.,0,.,19:.:.:.:.:.	0/1:40,0,71,.,.,.:.:.:.:.:.	2/2:47,.,.,6,.,0:.:.:.:.:.	12	18	8	8	2	10	11	10	19	9	CACTIG010000012.1	22845565	22886754	NC_048344.1|6566404|6607565|1|XM_034042198.2|XP_033898089.1|protein_BEAN1|41162	0
CACTIG010000012.1	22860284	.	G	A	228.328	SNP	AC=20;AD=13,29;ADF=5,14;ADR=8,15;AN=30;BQBZ=-1.68627;DP=419;DP4=39,49,164,149;FS=0;MQ=42;MQ0F=0;MQBZ=1.71986;MQSBZ=-0.126609;RPBZ=0.711109;SCBZ=-3.39117;SGB=-0.69168;VDB=0.914792;SNP;TS	1/1:255,57,0:19:0:0,11:0,8:0,19	1/1:255,66,0:22:0:0,13:0,9:0,22	1/1:255,46,0:22:0:0,12:1,8:1,20	1/1:255,30,0:23:0:1,9:0,13:1,22	1/1:246,36,0:12:0:0,9:0,3:0,12	0/1:244,0,70:.:.:.:.:.	0/1:255,0,213:.:.:.:.:.	0/1:255,0,132:.:.:.:.:.	0/1:255,0,121:.:.:.:.:.	0/1:255,0,194:.:.:.:.:.	22	32	34	31	43	22	24	24	25	15	CACTIG010000012.1	22845565	22886754	NC_048344.1|6566404|6607565|1|XM_034042198.2|XP_033898089.1|protein_BEAN1|41162	0
CACTIG010000012.1	23661056	.	A	G	226.606	SNP	AC=20;AD=8,19;ADF=6,12;ADR=2,7;AN=30;BQBZ=0.967981;DP=337;DP4=35,31,158,101;FS=0;MQ=59;MQ0F=0;MQBZ=-0.679366;MQSBZ=-0.715542;RPBZ=1.08109;SCBZ=0.955352;SGB=-0.693021;VDB=0.579393;SNP;TS	1/1:255,81,0:27:0:0,15:0,12:0,27	1/1:255,0,2:21:0:1,7:1,12:2,19	1/1:255,63,0:21:0:0,14:0,7:0,21	1/1:255,81,0:27:0:0,12:0,15:0,27	1/1:252,27,0:9:0:0,6:0,3:0,9	0/1:223,0,110:.:.:.:.:.	0/1:255,0,126:.:.:.:.:.	0/1:244,0,70:.:.:.:.:.	0/1:244,0,174:.:.:.:.:.	0/1:255,0,131:.:.:.:.:.	20	20	24	24	28	27	24	21	29	13	CACTIG010000012.1	23563611	23644536	NC_048344.1|5818457|5893195|-1|XM_034043020.2|XP_033898911.2|cadherin-8-like|74739	16520
CACTIG010000012.1	24272219	.	TAAAG	T	228.262	DEL	AC=20;AD=12,14;ADF=2,7;ADR=10,7;AN=30;DP=441;DP4=50,70,124,122;FS=0;IDV=23;IMF=0.657143;MQ=60;MQ0F=0;RPBZ=-2.66042;SCBZ=-1.98647;SGB=-0.692717;VDB=0.0127284;DEL;INDEL;TV	1/1:255,22,0:28:0:2,11:3,12:5,23	1/1:255,60,0:20:0:0,12:0,8:0,20	1/1:255,20,0:21:2:2,8:1,10:3,18	1/1:255,81,0:27:0:0,12:0,15:0,27	1/1:255,38,0:28:2:2,17:2,7:4,24	0/1:165,0,35:.:.:.:.:.	0/1:255,0,10:.:.:.:.:.	0/1:255,0,16:.:.:.:.:.	0/1:255,0,24:.:.:.:.:.	0/1:255,0,45:.:.:.:.:.	27	27	29	28	34	38	29	27	33	28	CACTIG010000012.1	24272018	24274942	NC_048344.1|5184079|5187194|1|XM_034043152.1|XP_033899043.1|borealin-2-like|3116	0
CACTIG010000012.1	24624665	.	G	A	228.238	SNP	AC=20;AD=7,31;ADF=2,13;ADR=5,18;AN=30;BQBZ=0.582981;DP=483;DP4=36,63,186,186;FS=0;MQ=58;MQ0F=0;MQBZ=-0.308288;MQSBZ=2.03287;RPBZ=0.754338;SCBZ=0.213201;SGB=-0.693127;VDB=0.0161378;SNP;TS	1/1:255,99,0:33:0:0,17:0,16:0,33	1/1:255,81,0:27:0:0,14:0,13:0,27	1/1:255,33,0:23:0:0,14:1,8:1,22	1/1:255,120,0:40:0:0,21:0,19:0,40	1/1:255,78,0:26:0:0,8:0,18:0,26	0/1:233,0,255:.:.:.:.:.	0/1:255,0,83:.:.:.:.:.	0/1:255,0,152:.:.:.:.:.	0/1:255,0,220:.:.:.:.:.	0/1:255,0,85:.:.:.:.:.	28	29	29	43	39	34	28	25	40	27	CACTIG010000012.1	24640614	24642998	NC_048344.1|4810890|4813289|1|XM_034042425.2|XP_033898316.1|cytochrome_b-c1_complex_subunit_Rieske,_mitochondrial-like|2400	15949
CACTIG010000012.1	24624772	.	T	TGA	228.131	INS	AC=20;AD=8,13;ADF=3,9;ADR=5,4;AN=30;DP=399;DP4=49,57,128,116;FS=0;IDV=26;IMF=0.962963;MQ=42;MQ0F=0;MQBZ=-1.68098;MQSBZ=-0.996673;RPBZ=-1.67083;SCBZ=-2.44949;SGB=-0.69168;VDB=0.298322;INDEL;INS;TV	1/1:255,57,0:19:0:0,5:0,14:0,19	1/1:255,63,0:21:0:0,13:0,8:0,21	1/1:255,11,0:19:0:1,9:1,8:2,17	1/1:255,69,0:23:0:0,10:0,13:0,23	1/1:151,12,0:4:0:0,3:0,1:0,4	0/1:242,0,210:.:.:.:.:.	0/1:255,0,74:.:.:.:.:.	0/1:255,0,72:.:.:.:.:.	0/1:255,0,98:.:.:.:.:.	0/1:246,0,107:.:.:.:.:.	33	26	25	34	25	27	27	21	29	11	CACTIG010000012.1	24640614	24642998	NC_048344.1|4810890|4813289|1|XM_034042425.2|XP_033898316.1|cytochrome_b-c1_complex_subunit_Rieske,_mitochondrial-like|2400	15842
CACTIG010000012.1	24889020	.	G	A	228.183	SNP	AC=20;AD=6,15;ADF=4,6;ADR=2,9;AN=30;BQBZ=0;DP=358;DP4=41,24,134,142;FS=0;MQ=59;MQ0F=0;MQSBZ=-1.19024;RPBZ=-0.108465;SCBZ=0.648886;SGB=-0.693079;VDB=0.63796;SNP;TS	1/1:255,84,0:29:0:0,17:0,11:0,28	1/1:255,11,0:16:0:1,6:0,9:1,15	1/1:255,48,0:16:0:0,8:0,8:0,16	1/1:255,54,0:18:0:0,13:0,5:0,18	1/1:255,45,0:15:0:0,8:0,7:0,15	0/1:255,0,44:.:.:.:.:.	0/1:255,0,126:.:.:.:.:.	0/1:255,0,156:.:.:.:.:.	0/1:255,0,161:.:.:.:.:.	0/1:255,0,128:.:.:.:.:.	21	28	28	31	22	31	20	18	21	15	CACTIG010000012.1	24836604	24859843	NC_048344.1|4591676|4614929|-1|XM_034042646.2|XP_033898537.1|unconventional_prefoldin_RPB5_interactor_1-like|23254	29177
CACTIG010000012.1	24889223	.	T	C	228.219	SNP	AC=20;AD=5,22;ADF=3,14;ADR=2,8;AN=30;BQBZ=0.983988;DP=432;DP4=34,42,187,150;FS=0;MQ=60;MQ0F=0;RPBZ=0.546085;SCBZ=0.446706;SGB=-0.693132;VDB=0.0742735;SNP;TS	1/1:255,102,0:34:0:0,17:0,17:0,34	1/1:255,4,0:23:3:2,12:0,9:2,21	1/1:255,45,0:15:0:0,10:0,5:0,15	1/1:255,75,0:25:0:0,11:0,14:0,25	1/1:255,48,0:16:0:0,7:0,9:0,16	0/1:255,0,132:.:.:.:.:.	0/1:255,0,167:.:.:.:.:.	0/1:255,0,212:.:.:.:.:.	0/1:255,0,118:.:.:.:.:.	0/1:255,0,70:.:.:.:.:.	29	30	40	34	31	35	25	15	25	17	CACTIG010000012.1	24836604	24859843	NC_048344.1|4591676|4614929|-1|XM_034042646.2|XP_033898537.1|unconventional_prefoldin_RPB5_interactor_1-like|23254	29380
CACTIG010000012.1	24952647	.	A	C	225.417	SNP	AC=20;AD=8,12;ADF=3,4;ADR=5,8;AN=30;BQBZ=0.34372;DP=377;DP4=30,66,98,178;FS=0;MQ=58;MQ0F=0;MQBZ=-1.11308;MQSBZ=0.566139;RPBZ=0.217089;SCBZ=0.970142;SGB=-0.693021;VDB=0.699348;SNP;TV	1/1:255,81,0:27:0:0,9:0,18:0,27	1/1:255,63,0:21:0:0,6:0,15:0,21	1/1:255,54,0:18:0:0,6:0,12:0,18	1/1:255,84,0:28:0:0,13:0,15:0,28	1/1:255,66,0:22:0:0,6:0,16:0,22	0/1:234,0,41:.:.:.:.:.	0/1:255,0,185:.:.:.:.:.	0/1:255,0,255:.:.:.:.:.	0/1:255,0,164:.:.:.:.:.	0/1:237,0,146:.:.:.:.:.	16	27	36	36	23	27	21	19	30	25	CACTIG010000012.1	24836604	24859843	NC_048344.1|4591676|4614929|-1|XM_034042646.2|XP_033898537.1|unconventional_prefoldin_RPB5_interactor_1-like|23254	92804
CACTIG010000012.1	25363909	.	TACAGTCAC	T	225.417	DEL	AC=20;AD=14,16;ADF=5,11;ADR=9,5;AN=30;DP=420;DP4=46,54,149,119;FS=0;IDV=20;IMF=0.869565;MQ=47;MQ0F=0;MQBZ=-2.7766;MQSBZ=-0.405596;RPBZ=-2.74132;SCBZ=-4.69042;SGB=-0.69168;VDB=0.30673;DEL;INDEL;TV	1/1:255,57,0:19:0:0,10:0,9:0,19	1/1:255,60,0:20:0:0,9:0,11:0,20	1/1:255,54,0:18:0:0,14:0,4:0,18	1/1:255,87,0:29:0:0,17:0,12:0,29	1/1:255,75,0:25:0:0,8:0,17:0,25	0/1:255,0,139:.:.:.:.:.	0/1:254,0,149:.:.:.:.:.	0/1:255,0,250:.:.:.:.:.	0/1:255,0,164:.:.:.:.:.	0/1:255,0,215:.:.:.:.:.	35	24	34	20	35	23	23	20	32	31	CACTIG010000012.1	25407608	25416532	NC_048344.1|4000183|4009111|-1|XM_034043316.2|XP_033899207.2|zinc_finger_protein_507-like|8929	43699
CACTIG010000012.1	25363966	.	A	G	225.417	SNP	AC=20;AD=9,25;ADF=3,16;ADR=6,9;AN=30;BQBZ=-1.0118;DP=407;DP4=20,44,171,142;FS=0;MQ=50;MQ0F=0;MQBZ=-3.36373;MQSBZ=1.40074;RPBZ=2.18347;SCBZ=0.793527;SGB=-0.692352;VDB=0.921936;SNP;TS	1/1:255,63,0:21:0:0,10:0,11:0,21	1/1:255,75,0:25:0:0,10:0,15:0,25	1/1:255,81,0:27:0:0,12:0,15:0,27	1/1:255,108,0:36:0:0,23:0,13:0,36	1/1:255,75,0:25:0:0,13:0,12:0,25	0/1:255,0,119:.:.:.:.:.	0/1:255,0,78:.:.:.:.:.	0/1:232,0,149:.:.:.:.:.	0/1:248,0,92:.:.:.:.:.	0/1:255,0,197:.:.:.:.:.	30	20	19	20	42	23	27	33	38	25	CACTIG010000012.1	25407608	25416532	NC_048344.1|4000183|4009111|-1|XM_034043316.2|XP_033899207.2|zinc_finger_protein_507-like|8929	43642
CACTIG010000012.1	25437730	.	A	C	225.417	SNP	AC=20;AD=8,19;ADF=7,13;ADR=1,6;AN=30;BQBZ=-0.906103;DP=338;DP4=52,40,173,56;FS=0;MQ=48;MQ0F=0;MQBZ=-2.97548;MQSBZ=2.31172;RPBZ=-0.0413224;SCBZ=0.877058;SGB=-0.692067;VDB=0.112489;SNP;TV	1/1:255,60,0:20:0:0,15:0,5:0,20	1/1:255,48,0:16:0:0,14:0,2:0,16	1/1:232,45,0:15:0:0,14:0,1:0,15	1/1:221,57,0:19:0:0,18:0,1:0,19	1/1:255,45,0:15:0:0,10:0,5:0,15	0/1:220,0,172:.:.:.:.:.	0/1:227,0,195:.:.:.:.:.	0/1:193,0,160:.:.:.:.:.	0/1:233,0,239:.:.:.:.:.	0/1:255,0,128:.:.:.:.:.	20	24	20	34	32	21	19	17	23	21	CACTIG010000012.1	25424191	25441396	NC_048344.1|3974992|3992522|-1|XM_034043066.1|XP_033898957.1|dpy-19_like_C-mannosyltransferase_3,_transcript_variant_X1|17531	0
CACTIG010000012.1	25446446	.	A	G	225.417	SNP	AC=20;AD=6,8;ADF=3,3;ADR=3,5;AN=30;BQBZ=1.09729;DP=358;DP4=32,28,139,152;FS=0;MQ=60;MQ0F=0;MQBZ=-0.898807;MQSBZ=1.27902;RPBZ=0.522007;SGB=-0.692352;VDB=0.409507;SNP;TS	1/1:255,63,0:21:0:0,10:0,11:0,21	1/1:255,87,0:29:0:0,14:0,15:0,29	1/1:255,66,0:22:0:0,15:0,7:0,22	1/1:255,45,0:15:0:0,8:0,7:0,15	1/1:255,72,0:24:0:0,10:0,14:0,24	0/1:255,0,76:.:.:.:.:.	0/1:255,0,149:.:.:.:.:.	0/1:255,0,78:.:.:.:.:.	0/1:253,0,79:.:.:.:.:.	0/1:167,0,136:.:.:.:.:.	23	33	35	17	15	23	30	23	17	25	CACTIG010000012.1	25424191	25441396	NC_048344.1|3974992|3992522|-1|XM_034043066.1|XP_033898957.1|dpy-19_like_C-mannosyltransferase_3,_transcript_variant_X1|17531	5050
CACTIG010000012.1	25974899	.	C	CCCT	228.409	INS	AC=18;AD=19,10;ADF=10,5;ADR=9,5;AN=26;BQBZ=-2.12315;DP=388;DP4=53,66,105,109;FS=0;IDV=12;IMF=0.6;MQ=51;MQ0F=0;MQBZ=0.596563;MQSBZ=1.78969;RPBZ=-0.347444;SCBZ=-2.12934;SGB=-0.686358;VDB=0.361542;INDEL;INS;TV	1/1:255,29,17:18:0:1,4:3,9:4,13	1/1:255,59,0:28:8:0,16:2,10:2,26	1/1:255,78,0:31:0:0,14:1,16:1,30	1/1:255,60,0:33:6:2,14:0,16:2,30	1/1:220,10,8:15:0:2,4:4,4:6,8	./.:.:.:.:.:.:.	0/1:255,0,10:.:.:.:.:.	0/1:255,0,35:.:.:.:.:.	0/1:255,0,29:.:.:.:.:.	0/1:218,0,34:.:.:.:.:.	33	43	19	28	35	20	31	33	35	25	CACTIG010000012.1	25970616	25979962	NC_048344.1|3435134|3444690|1|XM_034904265.1|XP_034760156.1|transcription_factor_E2F4-like|9557	0
CACTIG010000012.1	26405150	.	G	C	228.197	SNP	AC=20;AD=9,15;ADF=4,7;ADR=5,8;AN=30;BQBZ=0.109985;DP=364;DP4=45,40,131,135;FS=0;MQ=60;MQ0F=0;RPBZ=-0.674966;SGB=-0.692717;VDB=0.66596;SNP;TV	1/1:255,69,0:23:0:0,14:0,9:0,23	1/1:255,17,0:18:0:1,10:0,7:1,17	1/1:255,51,0:17:0:0,11:0,6:0,17	1/1:255,66,0:22:0:0,13:0,9:0,22	1/1:255,57,0:19:0:0,7:0,12:0,19	0/1:255,0,94:.:.:.:.:.	0/1:255,0,148:.:.:.:.:.	0/1:255,0,147:.:.:.:.:.	0/1:134,0,227:.:.:.:.:.	0/1:255,0,180:.:.:.:.:.	27	30	32	19	24	23	20	19	23	20	CACTIG010000012.1	26402159	26412221	NC_048344.1|3003717|3013710|-1|XM_034043177.2|XP_033899068.2|glucose-fructose_oxidoreductase_domain-containing_protein_2-like,_transcript_variant_X1|9994	0
CACTIG010000012.1	26565879	.	a	aAAAAAAATAAAT,aAAAAAAAT,aAAAAAATAAAT	225.417	INS	AC=14,6,2;AD=3,2,4,7;ADF=1,1,2,3;ADR=2,1,2,4;AN=26;DP=295;DP4=25,25,41,29;FS=0;IDV=3;IMF=0.130435;MQ=58;MQ0F=0;MQBZ=-0.118212;MQSBZ=-0.522009;RPBZ=-2.03772;SCBZ=-1.51428;SGB=-0.511536;VDB=0.0248912;INDEL;INS;TV	1/1:84,0,4,.,.,.,.,.,.,.:6:0:2,3,.,.:1,0,.,.:3,3,.,.	1/1:225,17,0,.,.,.,.,.,.,.:9:0:0,2,.,.:1,6,.,.:1,8,.,.	1/1:255,18,0,.,.,.,.,.,.,.:6:0:0,2,.,.:0,4,.,.:0,6,.,.	1/1:215,18,0,.,.,.,.,.,.,.:6:0:0,6,.,.:0,0,.,.:0,6,.,.	1/1:100,2,0,.,.,.,.,.,.,.:5:0:1,2,.,.:1,1,.,.:2,3,.,.	2/2:98,.,.,0,.,4,.,.,.,.:.:.:.:.:.	./.:.:.:.:.:.:.	3/2:255,.,.,171,.,173,94,.,0,102:.:.:.:.:.	0/1:154,0,5,.,.,.,.,.,.,.:.:.:.:.:.	0/1:65,0,5,.,.,.,.,.,.,.:.:.:.:.:.	22	18	32	24	22	23	21	19	14	23	CACTIG010000012.1	26565211	26570479	NC_048344.1|2844034|2849832|1|XM_034042206.2|XP_033898097.1|transmembrane_protein_170A-like|5799	0
CACTIG010000012.1	26601939	.	ttg	t	228.209	DEL	AC=20;AD=13,3;ADF=1,1;ADR=12,2;AN=30;BQBZ=-1.16407;DP=319;DP4=52,83,53,103;FS=0;IDV=14;IMF=0.608696;MQ=60;MQ0F=0;RPBZ=0.126395;SCBZ=0.816497;SGB=-0.686358;VDB=0.00155656;DEL;INDEL;TV	1/1:255,8,0:23:0:3,5:6,9:9,14	1/1:250,5,0:16:2:1,6:3,6:4,12	1/1:255,13,0:14:7:3,5:0,6:3,11	1/1:237,0,1:24:5:3,2:6,13:9,15	1/1:250,48,0:16:0:0,5:0,11:0,16	0/1:226,0,40:.:.:.:.:.	0/1:246,0,9:.:.:.:.:.	0/1:86,0,6:.:.:.:.:.	0/1:234,0,16:.:.:.:.:.	0/1:67,0,40:.:.:.:.:.	10	14	8	20	14	15	13	13	23	9	CACTIG010000012.1	26603750	26664832	NC_048344.1|2745968|2810776|-1|XM_034904636.1|XP_034760527.1|breast_cancer_anti-estrogen_resistance_protein_1-like,_transcript_variant_X1|64809	1811
CACTIG010000012.1	26741345	.	T	C,G	225.421	SNP	AC=20,4;AD=7,15,4;ADF=4,9,2;ADR=3,6,2;AN=30;BQBZ=0.119637;DP=345;DP4=32,20,153,129;FS=0;MQ=60;MQ0F=0;MQSBZ=1.43548;RPBZ=-0.521706;SCBZ=-0.935414;SGB=-0.69168;VDB=0.310689;SNP;TS;TV	1/1:255,57,0,.,.,.:19:0:0,10,.:0,9,.:0,19,.	1/1:255,54,0,.,.,.:19:0:0,11,.:0,7,.:0,18,.	1/1:255,84,0,.,.,.:28:0:0,17,.:0,11,.:0,28,.	1/1:255,48,0,.,.,.:16:0:0,10,.:0,6,.:0,16,.	1/1:255,102,0,.,.,.:34:0:0,17,.:0,17,.:0,34,.	0/1:167,0,156,.,.,.:.:.:.:.:.	1/2:255,230,185,255,0,255:.:.:.:.:.	0/1:255,0,202,.,.,.:.:.:.:.:.	1/2:255,148,118,214,0,202:.:.:.:.:.	0/1:255,0,139,.,.,.:.:.:.:.:.	17	25	35	16	22	21	21	29	17	35	CACTIG010000012.1	26742225	26752843	NC_048344.1|2649228|2659800|-1|XM_034043247.2|XP_033899138.2|Bardet-Biedl_syndrome_2_protein_homolog,_transcript_variant_X8|10573	880
CACTIG010000012.1	26826474	.	T	A	225.417	SNP	AC=20;AD=6,27;ADF=3,14;ADR=3,13;AN=30;BQBZ=-1.45232;DP=454;DP4=22,30,207,177;FS=0;MQ=60;MQ0F=0;RPBZ=1.69695;SGB=-0.692352;VDB=0.932365;SNP;TV	1/1:255,63,0:21:0:0,14:0,7:0,21	1/1:255,90,0:30:0:0,11:0,19:0,30	1/1:255,90,0:30:0:0,14:0,16:0,30	1/1:255,108,0:36:0:0,17:0,19:0,36	1/1:255,123,0:41:0:0,21:0,20:0,41	0/1:255,0,95:.:.:.:.:.	0/1:255,0,71:.:.:.:.:.	0/1:255,0,22:.:.:.:.:.	0/1:255,0,128:.:.:.:.:.	0/1:255,0,95:.:.:.:.:.	31	24	34	24	36	21	30	32	41	47	CACTIG010000012.1	26818895	26838477	NC_048344.1|2564471|2584019|-1|XM_034904653.1|XP_034760544.1|guanine_nucleotide-binding_protein_G(o)_subunit_alpha-like|19549	0
CACTIG010000012.1	26849404	.	T	G	225.417	SNP	AC=20;AD=4,20;ADF=2,12;ADR=2,8;AN=30;BQBZ=0.113592;DP=272;DP4=23,20,131,77;FS=0;MQ=45;MQ0F=0;MQBZ=-0.942809;MQSBZ=-0.233732;RPBZ=1.41213;SGB=-0.689466;VDB=0.372154;SNP;TV	1/1:255,48,0:16:0:0,11:0,5:0,16	1/1:252,12,0:16:0:1,8:0,7:1,15	1/1:255,54,0:18:0:0,11:0,7:0,18	1/1:255,48,0:16:0:0,7:0,9:0,16	1/1:255,33,0:11:0:0,6:0,5:0,11	0/1:84,0,72:.:.:.:.:.	0/1:195,0,160:.:.:.:.:.	0/1:230,0,81:.:.:.:.:.	0/1:255,0,33:.:.:.:.:.	0/1:255,0,53:.:.:.:.:.	7	16	21	24	26	17	16	20	18	17	CACTIG010000012.1	26818895	26838477	NC_048344.1|2564471|2584019|-1|XM_034904653.1|XP_034760544.1|guanine_nucleotide-binding_protein_G(o)_subunit_alpha-like|19549	10927
CACTIG010000012.1	26849405	.	T	C	228.15	SNP	AC=20;AD=4,20;ADF=2,12;ADR=2,8;AN=30;BQBZ=-0.697486;DP=273;DP4=25,20,131,78;FS=0;MQ=45;MQ0F=0;MQBZ=-0.942809;MQSBZ=-0.233732;RPBZ=1.41213;SGB=-0.689466;VDB=0.372154;SNP;TS	1/1:255,48,0:16:0:0,11:0,5:0,16	1/1:255,11,0:16:0:1,8:0,7:1,15	1/1:255,54,0:18:0:0,11:0,7:0,18	1/1:255,48,0:16:0:0,7:0,9:0,16	1/1:255,36,0:12:0:0,6:0,6:0,12	0/1:104,0,85:.:.:.:.:.	0/1:184,0,167:.:.:.:.:.	0/1:230,0,94:.:.:.:.:.	0/1:255,0,46:.:.:.:.:.	0/1:255,0,61:.:.:.:.:.	7	16	21	24	26	17	16	20	18	17	CACTIG010000012.1	26818895	26838477	NC_048344.1|2564471|2584019|-1|XM_034904653.1|XP_034760544.1|guanine_nucleotide-binding_protein_G(o)_subunit_alpha-like|19549	10928
CACTIG010000012.1	27953303	.	A	T	228.405	SNP	AC=20;AD=3,9;ADF=2,5;ADR=1,4;AN=30;BQBZ=1.70753;DP=210;DP4=26,15,91,56;FS=0;MQ=60;MQ0F=0;RPBZ=-0.145095;SCBZ=0.57735;SGB=-0.676189;VDB=0.11434;SNP;TV	1/1:246,20,0:12:0:0,7:1,4:1,11	1/1:255,0,0:19:0:3,9:1,6:4,15	1/1:215,8,0:17:3:2,12:1,2:3,14	1/1:246,23,0:14:0:1,10:0,3:1,13	1/1:255,30,0:10:0:0,5:0,5:0,10	0/1:208,0,12:.:.:.:.:.	0/1:118,0,18:.:.:.:.:.	0/1:182,0,9:.:.:.:.:.	0/1:228,0,21:.:.:.:.:.	0/1:200,0,16:.:.:.:.:.	13	11	12	18	12	15	22	19	16	10	CACTIG010000012.1	27885033	27973702	NC_048344.1|1419771|1508921|-1|XM_034904648.1|XP_034760539.1|uncharacterized_LOC117963677|89151	0
CACTIG010000012.1	28769506	.	T	C	228.191	SNP	AC=20;AD=6,25;ADF=1,11;ADR=5,14;AN=30;BQBZ=-0.211867;DP=400;DP4=22,45,143,157;FS=0;MQ=57;MQ0F=0;MQBZ=-0.445021;MQSBZ=0.547053;RPBZ=-0.28957;SCBZ=0.445566;SGB=-0.690438;VDB=0.961181;SNP;TS	1/1:255,17,0:18:0:0,10:1,7:1,17	1/1:255,81,0:27:0:0,16:0,11:0,27	1/1:255,66,0:22:0:0,16:0,6:0,22	1/1:255,66,0:22:0:0,8:0,14:0,22	1/1:255,54,0:18:0:0,7:0,11:0,18	0/1:255,0,143:.:.:.:.:.	0/1:255,0,176:.:.:.:.:.	0/1:255,0,186:.:.:.:.:.	0/1:255,0,9:.:.:.:.:.	0/1:255,0,79:.:.:.:.:.	27	35	25	25	36	22	30	24	29	25	CACTIG010000012.1	28760460	28766087	NC_048344.1|622129|627998|-1|XM_034904643.1|XP_034760534.1|sal-like_protein_1|5870	3419
CACTIG010000012.1	29103283	.	ta	t,tAAAAAAAAACAACa	198.319	DEL	AC=18,2;AD=7,3,3;ADF=3,1,1;ADR=4,2,2;AN=26;DP=279;DP4=21,15,68,52;FS=0;IDV=14;IMF=0.583333;MQ=57;MQ0F=0;MQBZ=0.18314;MQSBZ=0.0601929;RPBZ=-3.13605;SCBZ=-2.887;SGB=-0.686358;VDB=0.189068;DEL;INDEL;INS;TV	1/1:225,32,0,.,.,.:15:0:0,8,.:1,6,.:1,14,.	1/1:150,23,12,.,.,.:10:0:0,5,.:1,3,.:1,8,.	1/1:153,11,0,.,.,.:11:0:0,3,.:2,6,.:2,9,.	1/1:175,8,0,.,.,.:19:0:3,11,.:1,4,.:4,15,.	1/1:174,33,0,.,.,.:11:0:0,7,.:0,4,.:0,11,.	1/2:255,160,139,117,0,108:.:.:.:.:.	./.:.:.:.:.:.:.	0/1:129,0,9,.,.,.:.:.:.:.:.	0/1:145,0,22,.,.,.:.:.:.:.:.	0/1:50,0,54,.,.,.:.:.:.:.:.	22	23	22	28	23	28	27	19	33	25	CACTIG010000012.1	29082095	29148120	NC_048344.1|218297|302961|-1|XM_034043231.2|XP_033899122.1|zinc_finger_protein_423-like|84665	0
CACTIG010000012.1	29418750	.	A	G	130.817	SNP	AC=20;AD=24,10;ADF=6,2;ADR=18,8;AN=30;BQBZ=1.87489;DP=668;DP4=38,113,103,215;FS=0;MQ=17;MQ0F=0;MQBZ=-0.437292;MQSBZ=1.80353;RPBZ=1.92241;SCBZ=0.377964;SGB=-0.692352;VDB=3.6516e-05;SNP;TS	1/1:123,13,0:24:3:0,6:3,15:3,21	1/1:123,13,0:25:2:2,12:3,8:5,20	1/1:95,6,0:20:0:1,4:3,12:4,16	1/1:133,44,0:42:2:0,9:5,28:5,37	1/1:158,35,0:47:8:0,14:6,27:6,41	0/1:105,0,12:.:.:.:.:.	0/1:143,0,161:.:.:.:.:.	0/1:46,0,6:.:.:.:.:.	0/1:64,0,139:.:.:.:.:.	0/1:46,0,238:.:.:.:.:.	47	35	33	42	44	33	37	31	58	71	CACTIG010000012.1	29414498	29428671	NC_048339.1|358|14607|1|XM_034042185.2|XP_033898076.1|CMP-N-acetylneuraminate-beta-galactosamide-alpha-2,3-sialyltransferase_2-like,_transcript_variant_X2|14250	0
CACTIG010000015.1	239191	.	T	C	222.095	SNP	AC=20;AD=12,6;ADF=1,2;ADR=11,4;AN=30;BQBZ=-0.0439601;DP=245;DP4=34,62,60,83;FS=0;MQ=28;MQ0F=0;MQBZ=1.10022;MQSBZ=-2.8341;RPBZ=0.655652;SGB=-0.692352;VDB=0.5939;SNP;TS	1/1:249,25,0:24:3:2,8:1,13:3,21	1/1:187,51,0:17:0:0,7:0,10:0,17	1/1:93,12,0:4:0:0,0:0,4:0,4	1/1:179,36,0:12:0:0,5:0,7:0,12	1/1:165,27,0:9:0:0,4:0,5:0,9	0/1:115,0,144:.:.:.:.:.	0/1:143,0,6:.:.:.:.:.	0/1:37,0,134:.:.:.:.:.	0/1:58,0,6:.:.:.:.:.	0/1:64,0,49:.:.:.:.:.	16	15	25	10	20	24	19	5	14	11	CACTIG010000015.1	196867	203330	NW_023261207.1|36317|41534|-1|XM_034916871.1|XP_034772762.1|low_affinity_immunoglobulin_epsilon_Fc_receptor-like|5218	35861
CACTIG010000015.1	239192	.	T	G	223.043	SNP	AC=20;AD=12,6;ADF=1,2;ADR=11,4;AN=30;BQBZ=1.66753;DP=245;DP4=28,54,66,91;FS=0;MQ=28;MQ0F=0;MQBZ=1.10022;MQSBZ=-2.8341;RPBZ=0.655652;SGB=-0.692352;VDB=0.5939;SNP;TV	1/1:250,17,0:24:3:2,8:1,13:3,21	1/1:190,51,0:17:0:0,7:0,10:0,17	1/1:102,12,0:4:0:0,0:0,4:0,4	1/1:170,36,0:12:0:0,5:0,7:0,12	1/1:179,27,0:9:0:0,4:0,5:0,9	0/1:101,0,156:.:.:.:.:.	0/1:142,0,6:.:.:.:.:.	0/1:143,0,50:.:.:.:.:.	0/1:41,0,2:.:.:.:.:.	0/1:56,0,49:.:.:.:.:.	16	15	25	10	20	24	19	5	14	11	CACTIG010000015.1	196867	203330	NW_023261207.1|36317|41534|-1|XM_034916871.1|XP_034772762.1|low_affinity_immunoglobulin_epsilon_Fc_receptor-like|5218	35862
CACTIG010000019.1	149452	.	A	T	228.391	SNP	AC=20;AD=5,32;ADF=2,14;ADR=3,18;AN=30;BQBZ=1.90406;DP=580;DP4=47,39,194,260;FS=0;MQ=53;MQ0F=0;MQBZ=-0.742468;MQSBZ=1.20274;RPBZ=-0.69393;SCBZ=0.321634;SGB=-0.693132;VDB=0.414735;SNP;TV	1/1:255,90,0:35:0:1,22:0,12:1,34	1/1:255,32,0:38:3:2,19:0,17:2,36	1/1:255,0,4:36:0:1,12:3,20:4,32	1/1:255,0,2:32:6:3,14:0,15:3,29	1/1:255,93,0:31:0:0,17:0,14:0,31	0/1:255,0,25:.:.:.:.:.	0/1:255,0,74:.:.:.:.:.	0/1:255,0,114:.:.:.:.:.	0/1:255,0,202:.:.:.:.:.	0/1:255,0,26:.:.:.:.:.	28	47	35	47	43	37	44	40	36	39	CACTIG010000019.1	142900	150735	NC_048361.1|2739626|2747537|-1|XM_034047798.2|XP_033903689.1|vesicle_transport_protein_USE1-like,_transcript_variant_X1|7912	0
CACTIG010000023.1	763926	.	G	A	225.417	SNP	AC=20;AD=11,22;ADF=7,12;ADR=4,10;AN=30;BQBZ=-1.42601;DP=407;DP4=68,62,143,112;FS=0;MQ=60;MQ0F=0;RPBZ=-0.521997;SCBZ=1.26491;SGB=-0.692352;VDB=0.559558;SNP;TS	1/1:255,63,0:21:0:0,11:0,10:0,21	1/1:255,57,0:19:0:0,13:0,6:0,19	1/1:255,42,0:14:0:0,6:0,8:0,14	1/1:255,87,0:29:0:0,21:0,8:0,29	1/1:255,78,0:26:0:0,18:0,8:0,26	0/1:217,0,254:.:.:.:.:.	0/1:255,0,143:.:.:.:.:.	0/1:199,0,255:.:.:.:.:.	0/1:201,0,255:.:.:.:.:.	0/1:255,0,195:.:.:.:.:.	25	27	30	29	36	24	19	15	30	28	CACTIG010000023.1	765009	777201	NW_023263947.1|22083|32773|1|XM_034920449.1|XP_034776340.1|ras-related_protein_Ral-B,_transcript_variant_X1|10691	1083
CACTIG010000023.1	1062899	.	T	C	228.405	SNP	AC=20;AD=5,37;ADF=2,16;ADR=3,21;AN=30;BQBZ=2.55252;DP=446;DP4=40,41,191,160;FS=0;MQ=45;MQ0F=0;MQBZ=1.80947;MQSBZ=-1.75726;RPBZ=0.665425;SCBZ=-5.38516;SGB=-0.693054;VDB=0.139635;SNP;TS	1/1:255,84,0:28:0:0,14:0,14:0,28	1/1:255,45,0:30:7:0,17:2,11:2,28	1/1:255,0,2:21:7:3,8:0,10:3,18	1/1:255,7,0:31:5:1,14:4,12:5,26	1/1:255,58,0:24:0:0,14:1,9:1,23	0/1:251,0,243:.:.:.:.:.	0/1:255,0,20:.:.:.:.:.	0/1:255,0,18:.:.:.:.:.	0/1:255,0,7:.:.:.:.:.	0/1:255,0,35:.:.:.:.:.	33	29	21	32	43	30	31	23	31	25	CACTIG010000023.1	1052050	1061320	NC_048332.1|48785370|48794590|-1|XM_034924538.1|XP_034780429.1|isocitrate_dehydrogenase_[NADP]_cytoplasmic-like|9221	1579
CACTIG010000023.1	1570253	.	C	T	225.417	SNP	AC=20;AD=17,17;ADF=5,6;ADR=12,11;AN=30;BQBZ=-0.681178;DP=514;DP4=52,86,143,211;FS=0;MQ=60;MQ0F=0;MQBZ=-0.731925;MQSBZ=1.2792;RPBZ=1.94134;SCBZ=-1.80336;SGB=-0.692562;VDB=0.0509003;SNP;TS	1/1:255,66,0:22:0:0,9:0,13:0,22	1/1:255,90,0:30:0:0,11:0,19:0,30	1/1:255,84,0:28:0:0,9:0,19:0,28	1/1:255,93,0:31:0:0,11:0,20:0,31	1/1:255,87,0:29:0:0,11:0,18:0,29	0/1:255,0,223:.:.:.:.:.	0/1:255,0,246:.:.:.:.:.	0/1:255,0,255:.:.:.:.:.	0/1:255,0,121:.:.:.:.:.	0/1:255,0,255:.:.:.:.:.	30	47	46	30	34	25	31	28	33	31	CACTIG010000023.1	1542205	1576534	NC_048332.1|48267752|48302077|-1|XM_034924513.1|XP_034780404.1|ATP-binding_cassette,_sub-family_A_(ABC1),_member_12,_transcript_variant_X1|34326	0
CACTIG010000023.1	2197032	.	tg	t	161.416	DEL	AC=16;AD=3,11;ADF=1,4;ADR=2,7;AN=22;DP=150;DP4=10,26,15,78;FS=0;IDV=5;IMF=1;MQ=40;MQ0F=0;MQBZ=-2.08056;MQSBZ=-0.0994813;RPBZ=-2.15211;SCBZ=-2.81989;SGB=-0.590765;VDB=0.476318;DEL;INDEL;TV	1/1:112,15,0:5:0:0,1:0,4:0,5	1/1:161,30,0:10:0:0,2:0,8:0,10	1/1:191,36,0:12:0:0,2:0,10:0,12	1/1:127,36,0:12:0:0,0:0,12:0,12	1/1:140,30,0:10:0:0,0:0,10:0,10	0/1:50,0,210:.:.:.:.:.	0/1:107,0,85:.:.:.:.:.	./.:.:.:.:.:.:.	0/1:166,0,73:.:.:.:.:.	./.:.:.:.:.:.:.	13	16	2	18	24	5	13	13	12	14	CACTIG010000023.1	2215461	2257370	NC_048332.1|47578333|47620398|1|XM_034021528.2|XP_033877419.2|carbamoyl-phosphate_synthase_1,_mitochondrial|42066	18429
CACTIG010000023.1	2334196	.	T	C	228.203	SNP	AC=18;AD=13,13;ADF=7,5;ADR=6,8;AN=26;BQBZ=1.46377;DP=323;DP4=28,43,111,138;FS=0;MQ=56;MQ0F=0;MQBZ=-0.258199;MQSBZ=-1.91167;RPBZ=0.759816;SGB=-0.69311;VDB=0.633439;SNP;TS	1/1:255,93,0:31:0:0,19:0,12:0,31	1/1:255,36,0:12:0:0,3:0,9:0,12	1/1:255,18,0:16:0:0,9:1,6:1,15	1/1:255,75,0:25:0:0,14:0,11:0,25	1/1:255,51,0:17:0:0,7:0,10:0,17	./.:.:.:.:.:.:.	0/1:255,0,176:.:.:.:.:.	0/1:255,0,44:.:.:.:.:.	0/1:255,0,155:.:.:.:.:.	0/1:238,0,234:.:.:.:.:.	4	34	27	24	26	31	13	16	25	18	CACTIG010000023.1	2294349	2318974	NC_048332.1|47515743|47540692|-1|XM_034001847.2|XP_033857738.2|KAT8_regulatory_NSL_complex_subunit_1-like,_transcript_variant_X1|24950	15222
CACTIG010000023.1	2485707	.	C	T	193.416	SNP	AC=20;AD=12,8;ADF=8,8;ADR=4,0;AN=30;BQBZ=-0.791698;DP=215;DP4=49,9,147,4;FS=0;MQ=42;MQ0F=0;MQBZ=0.838727;MQSBZ=-2.2245;RPBZ=-0.776871;SGB=-0.670168;VDB=0.568713;SNP;TS	1/1:176,30,0:10:0:0,10:0,0:0,10	1/1:223,45,0:15:0:0,13:0,2:0,15	1/1:170,30,0:10:0:0,10:0,0:0,10	1/1:191,48,0:16:0:0,16:0,0:0,16	1/1:181,36,0:12:0:0,12:0,0:0,12	0/1:123,0,61:.:.:.:.:.	0/1:152,0,79:.:.:.:.:.	0/1:126,0,101:.:.:.:.:.	0/1:105,0,44:.:.:.:.:.	0/1:100,0,233:.:.:.:.:.	12	19	15	9	21	10	17	10	16	12	CACTIG010000023.1	2433931	2616543	NC_048332.1|47220053|47404083|-1|XM_034015906.2|XP_033871797.1|arf-GAP_with_GTPase,_ANK_repeat_and_PH_domain-containing_protein_1-like,_transcript_variant_X7|184031	0
CACTIG010000023.1	2486591	.	C	A	225.417	SNP	AC=20;AD=29,13;ADF=15,7;ADR=14,6;AN=30;BQBZ=-1.05308;DP=475;DP4=70,64,155,163;FS=0;MQ=60;MQ0F=0;RPBZ=0.701374;SCBZ=0.796628;SGB=-0.693054;VDB=0.101761;SNP;TV	1/1:255,84,0:28:0:0,15:0,13:0,28	1/1:255,54,0:18:0:0,6:0,12:0,18	1/1:255,51,0:17:0:0,6:0,11:0,17	1/1:255,75,0:25:0:0,9:0,16:0,25	1/1:255,102,0:34:0:0,23:0,11:0,34	0/1:255,0,121:.:.:.:.:.	0/1:255,0,133:.:.:.:.:.	0/1:255,0,255:.:.:.:.:.	0/1:255,0,136:.:.:.:.:.	0/1:206,0,255:.:.:.:.:.	24	36	33	38	45	29	18	22	31	37	CACTIG010000023.1	2433931	2616543	NC_048332.1|47220053|47404083|-1|XM_034015906.2|XP_033871797.1|arf-GAP_with_GTPase,_ANK_repeat_and_PH_domain-containing_protein_1-like,_transcript_variant_X7|184031	0
CACTIG010000023.1	2854710	.	G	T	216.417	SNP	AC=18;AD=3,4;ADF=1,0;ADR=2,4;AN=26;BQBZ=1.20576;DP=99;DP4=16,28,9,38;FS=0;MQ=60;MQ0F=0;MQBZ=-2.41523;MQSBZ=2;RPBZ=0.387298;SCBZ=2.41523;SGB=-0.453602;VDB=0.02;SNP;TV	1/1:61,6,0:2:0:0,0:0,2:0,2	1/1:68,6,0:2:0:0,2:0,0:0,2	1/1:105,12,0:4:0:0,0:0,4:0,4	1/1:127,15,0:5:0:0,1:0,4:0,5	1/1:246,24,0:8:0:0,4:0,4:0,8	0/1:71,0,152:.:.:.:.:.	0/1:48,0,117:.:.:.:.:.	0/1:130,0,201:.:.:.:.:.	./.:.:.:.:.:.:.	0/1:96,0,80:.:.:.:.:.	20	20	40	17	23	20	28	19	25	29	CACTIG010000023.1	2794094	2853967	NC_048332.1|46984832|47044347|1|XM_034021303.2|XP_033877194.2|collagen_alpha-3(VI)_chain-like,_transcript_variant_X1|59516	743
CACTIG010000023.1	2854890	.	g	gA	225.417	INS	AC=18;AD=12,10;ADF=6,4;ADR=6,6;AN=26;DP=176;DP4=30,20,54,58;FS=0;IDV=4;IMF=0.8;MQ=60;MQ0F=0;MQBZ=0.987421;MQSBZ=-0.44691;RPBZ=-1.41421;SCBZ=0.5;SGB=-0.556411;VDB=0.100421;INDEL;INS;TV	1/1:101,12,0:4:0:0,3:0,1:0,4	1/1:212,30,0:10:0:0,6:0,4:0,10	1/1:115,12,0:4:0:0,2:0,2:0,4	1/1:255,42,0:14:0:0,7:0,7:0,14	1/1:228,30,0:22:3:2,10:0,9:2,19	0/1:55,0,89:.:.:.:.:.	0/1:94,0,35:.:.:.:.:.	0/1:204,0,38:.:.:.:.:.	./.:.:.:.:.:.:.	0/1:161,0,87:.:.:.:.:.	11	8	20	4	25	6	13	5	18	31	CACTIG010000023.1	2794094	2853967	NC_048332.1|46984832|47044347|1|XM_034021303.2|XP_033877194.2|collagen_alpha-3(VI)_chain-like,_transcript_variant_X1|59516	923
CACTIG010000023.1	2855428	.	T	C	225.417	SNP	AC=18;AD=11,7;ADF=7,3;ADR=4,4;AN=26;BQBZ=1.76383;DP=151;DP4=21,28,78,19;FS=0;MQ=34;MQ0F=0;MQBZ=-1.62747;MQSBZ=-2;RPBZ=0.658586;SCBZ=1;SGB=-0.590765;VDB=0.14314;SNP;TS	1/1:127,15,0:5:0:0,4:0,1:0,5	1/1:224,30,0:10:0:0,8:0,2:0,10	1/1:139,18,0:6:0:0,6:0,0:0,6	1/1:255,30,0:10:0:0,7:0,3:0,10	1/1:128,9,0:8:0:1,7:0,0:1,7	0/1:118,0,175:.:.:.:.:.	0/1:143,0,78:.:.:.:.:.	0/1:144,0,66:.:.:.:.:.	0/1:122,0,217:.:.:.:.:.	./.:.:.:.:.:.:.	17	15	11	19	9	6	10	6	15	11	CACTIG010000023.1	2794094	2853967	NC_048332.1|46984832|47044347|1|XM_034021303.2|XP_033877194.2|collagen_alpha-3(VI)_chain-like,_transcript_variant_X1|59516	1461
CACTIG010000023.1	2855429	.	A	T	225.417	SNP	AC=18;AD=11,7;ADF=7,3;ADR=4,4;AN=26;BQBZ=-2.65468;DP=151;DP4=20,28,79,19;FS=0;MQ=34;MQ0F=0;MQBZ=-3.20713;MQSBZ=-1.73205;RPBZ=0.800641;SCBZ=1;SGB=-0.616816;VDB=0.203362;SNP;TV	1/1:119,18,0:6:0:0,5:0,1:0,6	1/1:215,30,0:10:0:0,8:0,2:0,10	1/1:123,18,0:6:0:0,6:0,0:0,6	1/1:255,30,0:10:0:0,7:0,3:0,10	1/1:124,21,0:7:0:0,7:0,0:0,7	0/1:99,0,177:.:.:.:.:.	0/1:143,0,79:.:.:.:.:.	0/1:145,0,65:.:.:.:.:.	0/1:119,0,228:.:.:.:.:.	./.:.:.:.:.:.:.	17	15	11	19	9	6	10	6	15	11	CACTIG010000023.1	2794094	2853967	NC_048332.1|46984832|47044347|1|XM_034021303.2|XP_033877194.2|collagen_alpha-3(VI)_chain-like,_transcript_variant_X1|59516	1462
CACTIG010000023.1	2856496	.	ta	t	174.93	DEL	AC=20;AD=7,16;ADF=4,8;ADR=3,8;AN=30;DP=432;DP4=41,32,138,118;FS=0;IDV=20;IMF=0.8;MQ=60;MQ0F=0;MQBZ=-0.377964;MQSBZ=-0.690066;RPBZ=-3.39814;SCBZ=0.793405;SGB=-0.691153;VDB=0.684248;DEL;INDEL;TV	1/1:198,54,0:18:0:0,10:0,8:0,18	1/1:153,37,0:26:0:1,11:1,13:2,24	1/1:202,14,0:24:6:0,9:3,12:3,21	1/1:204,69,0:23:0:0,8:0,15:0,23	1/1:201,54,0:18:0:0,10:0,8:0,18	0/1:144,0,25:.:.:.:.:.	0/1:137,0,46:.:.:.:.:.	0/1:196,0,72:.:.:.:.:.	0/1:95,0,76:.:.:.:.:.	0/1:127,0,55:.:.:.:.:.	22	32	60	23	32	25	32	35	39	21	CACTIG010000023.1	2794094	2853967	NC_048332.1|46984832|47044347|1|XM_034021303.2|XP_033877194.2|collagen_alpha-3(VI)_chain-like,_transcript_variant_X1|59516	2529
CACTIG010000023.1	2856905	.	G	A	225.417	SNP	AC=20;AD=9,8;ADF=4,0;ADR=5,8;AN=30;BQBZ=-0.476731;DP=235;DP4=10,39,13,165;FS=0;MQ=60;MQ0F=0;MQSBZ=3.4641;RPBZ=-1.62163;SGB=-0.676189;VDB=0.183236;SNP;TS	1/1:180,33,0:11:0:0,0:0,11:0,11	1/1:255,42,0:14:0:0,3:0,11:0,14	1/1:209,39,0:13:0:0,1:0,12:0,13	1/1:255,48,0:16:0:0,3:0,13:0,16	1/1:183,8,0:15:0:0,0:1,14:1,14	0/1:119,0,89:.:.:.:.:.	0/1:186,0,30:.:.:.:.:.	0/1:172,0,69:.:.:.:.:.	0/1:188,0,67:.:.:.:.:.	0/1:128,0,225:.:.:.:.:.	11	22	14	18	18	11	16	14	17	17	CACTIG010000023.1	2794094	2853967	NC_048332.1|46984832|47044347|1|XM_034021303.2|XP_033877194.2|collagen_alpha-3(VI)_chain-like,_transcript_variant_X1|59516	2938
CACTIG010000023.1	2856906	.	A	T	225.417	SNP	AC=20;AD=9,8;ADF=4,0;ADR=5,8;AN=30;BQBZ=0.126055;DP=234;DP4=12,37,13,164;FS=0;MQ=60;MQ0F=0;MQSBZ=3.31662;RPBZ=-1.62163;SGB=-0.676189;VDB=0.183236;SNP;TV	1/1:180,33,0:11:0:0,0:0,11:0,11	1/1:255,42,0:14:0:0,3:0,11:0,14	1/1:212,36,0:12:0:0,1:0,11:0,12	1/1:255,48,0:16:0:0,3:0,13:0,16	1/1:184,8,0:15:0:0,0:1,14:1,14	0/1:115,0,84:.:.:.:.:.	0/1:181,0,30:.:.:.:.:.	0/1:174,0,62:.:.:.:.:.	0/1:165,0,75:.:.:.:.:.	0/1:131,0,217:.:.:.:.:.	11	22	14	18	18	11	16	14	17	17	CACTIG010000023.1	2794094	2853967	NC_048332.1|46984832|47044347|1|XM_034021303.2|XP_033877194.2|collagen_alpha-3(VI)_chain-like,_transcript_variant_X1|59516	2939
CACTIG010000023.1	2857529	.	A	T	225.421	SNP	AC=20;AD=9,15;ADF=3,3;ADR=6,12;AN=30;BQBZ=0.670671;DP=448;DP4=28,40,158,207;FS=0;MQ=60;MQ0F=0;MQBZ=-0.361158;MQSBZ=1.34549;RPBZ=-1.15692;SGB=-0.693141;VDB=0.922954;SNP;TV	1/1:255,111,0:37:0:0,21:0,16:0,37	1/1:255,96,0:32:0:0,17:0,15:0,32	1/1:255,87,0:30:0:0,16:0,13:0,29	1/1:255,87,0:29:0:0,6:0,23:0,29	1/1:255,81,0:27:0:0,14:0,13:0,27	0/1:255,0,42:.:.:.:.:.	0/1:255,0,15:.:.:.:.:.	0/1:255,0,161:.:.:.:.:.	0/1:255,0,174:.:.:.:.:.	0/1:221,0,177:.:.:.:.:.	24	28	36	35	25	39	34	30	30	29	CACTIG010000023.1	2794094	2853967	NC_048332.1|46984832|47044347|1|XM_034021303.2|XP_033877194.2|collagen_alpha-3(VI)_chain-like,_transcript_variant_X1|59516	3562
CACTIG010000023.1	2857926	.	TGTGA	T	228.269	DEL	AC=20;AD=10,10;ADF=8,6;ADR=2,4;AN=30;DP=382;DP4=48,37,94,70;FS=0;IDV=21;IMF=0.913043;MQ=60;MQ0F=0;MQBZ=2.44949;MQSBZ=-1.1547;RPBZ=-2.29242;SCBZ=-2.23122;SGB=-0.670168;VDB=0.00869464;DEL;INDEL;TV	1/1:245,18,0:11:0:0,3:1,7:1,10	1/1:242,13,0:12:0:1,5:1,5:2,10	1/1:255,20,0:12:0:0,3:1,8:1,11	1/1:255,0,4:18:2:3,8:3,4:6,12	1/1:255,27,0:18:0:0,11:1,6:1,17	0/1:183,0,133:.:.:.:.:.	0/1:207,0,22:.:.:.:.:.	0/1:255,0,50:.:.:.:.:.	0/1:216,0,116:.:.:.:.:.	0/1:214,0,164:.:.:.:.:.	24	28	24	26	34	23	22	22	25	23	CACTIG010000023.1	2794094	2853967	NC_048332.1|46984832|47044347|1|XM_034021303.2|XP_033877194.2|collagen_alpha-3(VI)_chain-like,_transcript_variant_X1|59516	3959
CACTIG010000023.1	2858143	.	C	A	220.417	SNP	AC=20;AD=7,17;ADF=0,0;ADR=7,17;AN=30;BQBZ=1.03965;DP=228;DP4=4,33,11,163;FS=0;MQ=56;MQ0F=0;MQBZ=-0.572078;MQSBZ=1.52635;RPBZ=-0.724207;SCBZ=1.31747;SGB=-0.683931;VDB=0.121667;SNP;TV	1/1:250,39,0:13:0:0,1:0,12:0,13	1/1:215,27,0:9:0:0,1:0,8:0,9	1/1:200,33,0:11:0:0,0:0,11:0,11	1/1:233,36,0:12:0:0,1:0,11:0,12	1/1:222,8,0:12:0:0,2:1,9:1,11	0/1:146,0,116:.:.:.:.:.	0/1:193,0,26:.:.:.:.:.	0/1:172,0,90:.:.:.:.:.	0/1:185,0,53:.:.:.:.:.	0/1:162,0,105:.:.:.:.:.	29	20	28	25	39	26	18	15	21	21	CACTIG010000023.1	2794094	2853967	NC_048332.1|46984832|47044347|1|XM_034021303.2|XP_033877194.2|collagen_alpha-3(VI)_chain-like,_transcript_variant_X1|59516	4176
CACTIG010000023.1	3677355	.	G	C	228.279	SNP	AC=20;AD=37,173;ADF=15,78;ADR=22,95;AN=30;BQBZ=-0.131797;DP=2613;DP4=172,162,976,1198;FS=0;MQ=60;MQ0F=0;RPBZ=0.151657;SCBZ=0.198517;SGB=-0.693147;VDB=0.987648;SNP;TV	1/1:255,46,0:180:7:11,75:6,88:17,163	1/1:255,58,0:195:2:10,73:11,101:21,174	1/1:255,183,0:218:1:9,88:10,111:19,199	1/1:255,255,0:211:0:4,95:4,108:8,203	1/1:255,165,0:216:1:10,95:9,102:19,197	0/1:255,0,63:.:.:.:.:.	0/1:255,0,82:.:.:.:.:.	0/1:255,0,106:.:.:.:.:.	0/1:255,0,204:.:.:.:.:.	0/1:255,0,81:.:.:.:.:.	161	117	188	95	220	193	215	239	223	241	CACTIG010000023.1	3674754	3678239	NC_048332.1|46133745|46137234|-1|XM_034924382.1|XP_034780273.1|shugoshin_2-like,_transcript_variant_X2|3490	0
CACTIG010000023.1	3686223	.	G	A	228.091	SNP	AC=20;AD=34,172;ADF=18,92;ADR=16,80;AN=30;BQBZ=0.184711;DP=2500;DP4=206,213,983,1039;FS=0;MQ=55;MQ0F=0;MQBZ=-1.23885;MQSBZ=0.142115;RPBZ=-2.50863;SCBZ=0.359597;SGB=-0.693147;VDB=0.36173;SNP;TS	1/1:255,5,0:131:4:9,53:6,62:15,115	1/1:255,83,0:193:6:8,92:13,80:21,172	1/1:255,116,0:221:15:13,71:8,128:21,199	1/1:255,21,0:201:0:11,75:15,100:26,175	1/1:255,66,0:211:7:9,89:17,96:26,185	0/1:255,0,142:.:.:.:.:.	0/1:255,0,160:.:.:.:.:.	0/1:255,0,157:.:.:.:.:.	0/1:255,0,255:.:.:.:.:.	0/1:255,0,38:.:.:.:.:.	165	109	172	108	216	138	200	235	211	227	CACTIG010000023.1	3683473	3687902	NC_048332.1|46124064|46128515|-1|XM_034009136.1|XP_033865027.1|uncharacterized_protein_C2orf80-like,_transcript_variant_X2|4452	0
CACTIG010000023.1	3686380	.	G	A	228.117	SNP	AC=20;AD=27,139;ADF=14,54;ADR=13,85;AN=30;BQBZ=-1.37924;DP=2266;DP4=176,150,855,1029;FS=0;MQ=60;MQ0F=0;RPBZ=-1.26172;SCBZ=0.303822;SGB=-0.693147;VDB=0.736676;SNP;TS	1/1:255,82,0:142:0:6,63:6,67:12,130	1/1:255,64,0:206:1:11,89:10,96:21,185	1/1:255,206,0:198:2:6,97:8,87:14,184	1/1:255,124,0:176:1:8,77:7,83:15,160	1/1:255,73,0:148:8:9,55:5,79:14,134	0/1:254,0,37:.:.:.:.:.	0/1:255,0,201:.:.:.:.:.	0/1:255,0,183:.:.:.:.:.	0/1:255,0,156:.:.:.:.:.	0/1:246,0,75:.:.:.:.:.	136	130	154	106	174	145	218	209	183	158	CACTIG010000023.1	3683473	3687902	NC_048332.1|46124064|46128515|-1|XM_034009136.1|XP_033865027.1|uncharacterized_protein_C2orf80-like,_transcript_variant_X2|4452	0
CACTIG010000023.1	3686382	.	C	G	228.08	SNP	AC=20;AD=27,138;ADF=15,57;ADR=12,81;AN=30;BQBZ=0.536311;DP=2278;DP4=182,155,873,1016;FS=0;MQ=60;MQ0F=0;RPBZ=-1.20801;SCBZ=-3.16228;SGB=-0.693147;VDB=0.794896;SNP;TV	1/1:255,85,0:143:0:7,65:6,65:13,130	1/1:252,47,0:205:0:11,91:11,91:22,182	1/1:255,169,0:199:2:7,96:9,87:16,183	1/1:255,80,0:180:2:9,74:8,89:17,163	1/1:255,87,0:147:6:8,57:5,77:13,134	0/1:253,0,30:.:.:.:.:.	0/1:255,0,221:.:.:.:.:.	0/1:255,0,192:.:.:.:.:.	0/1:255,0,138:.:.:.:.:.	0/1:255,0,73:.:.:.:.:.	140	132	159	104	171	146	217	210	187	155	CACTIG010000023.1	3683473	3687902	NC_048332.1|46124064|46128515|-1|XM_034009136.1|XP_033865027.1|uncharacterized_protein_C2orf80-like,_transcript_variant_X2|4452	0
CACTIG010000023.1	5774394	.	ct	c	159.42	DEL	AC=20;AD=15,22;ADF=5,13;ADR=10,9;AN=30;BQBZ=-1.7764;DP=413;DP4=57,55,112,114;FS=0;IDV=25;IMF=0.833333;MQ=60;MQ0F=0;RPBZ=-3.48231;SCBZ=-0.855236;SGB=-0.69168;VDB=0.111305;DEL;INDEL;TV	1/1:180,58,24:20:0:1,7:0,9:1,16	1/1:177,51,0:18:0:0,5:0,12:0,17	1/1:176,44,0:19:0:1,8:0,10:1,18	1/1:160,15,0:23:0:3,9:3,8:6,17	1/1:189,45,0:16:0:0,9:0,6:0,15	0/1:143,0,29:.:.:.:.:.	0/1:47,0,11:.:.:.:.:.	0/1:72,17,62:.:.:.:.:.	0/1:75,0,54:.:.:.:.:.	0/1:176,0,101:.:.:.:.:.	33	9	32	22	45	31	22	18	26	22	CACTIG010000023.1	5774101	5852604	NC_048332.1|43940289|44023783|-1|XM_034012731.2|XP_033868622.1|alpha-1,6-mannosylglycoprotein_6-beta-N-acetylglucosaminyltransferase,_transcript_variant_X1|83495	0
CACTIG010000023.1	5804238	.	G	C	225.417	SNP	AC=20;AD=12,13;ADF=3,4;ADR=9,9;AN=30;BQBZ=-0.127962;DP=344;DP4=30,48,114,135;FS=0;MQ=59;MQ0F=0;MQBZ=-0.5547;MQSBZ=0.617213;RPBZ=1.35893;SCBZ=1.79284;SGB=-0.693079;VDB=0.256711;SNP;TV	1/1:255,87,0:29:0:0,21:0,8:0,29	1/1:255,54,0:18:0:0,9:0,9:0,18	1/1:255,66,0:22:0:0,9:0,13:0,22	1/1:255,102,0:34:0:0,12:0,22:0,34	1/1:255,48,0:16:0:0,7:0,9:0,16	0/1:136,0,224:.:.:.:.:.	0/1:255,0,98:.:.:.:.:.	0/1:255,0,88:.:.:.:.:.	0/1:254,0,145:.:.:.:.:.	0/1:231,0,218:.:.:.:.:.	19	26	18	24	27	31	22	24	36	19	CACTIG010000023.1	5774101	5852604	NC_048332.1|43940289|44023783|-1|XM_034012731.2|XP_033868622.1|alpha-1,6-mannosylglycoprotein_6-beta-N-acetylglucosaminyltransferase,_transcript_variant_X1|83495	0
CACTIG010000023.1	5810888	.	G	A	225.417	SNP	AC=20;AD=3,27;ADF=0,10;ADR=3,17;AN=30;BQBZ=-0.918561;DP=389;DP4=18,44,126,186;FS=0;MQ=60;MQ0F=0;MQBZ=-0.333333;MQSBZ=-1;RPBZ=0.73495;SCBZ=-1.51658;SGB=-0.692831;VDB=0.142184;SNP;TS	1/1:255,72,0:24:0:0,12:0,12:0,24	1/1:255,36,0:12:0:0,7:0,5:0,12	1/1:255,51,0:17:0:0,9:0,8:0,17	1/1:255,111,0:37:0:0,7:0,30:0,37	1/1:255,66,0:22:0:0,11:0,11:0,22	0/1:200,0,115:.:.:.:.:.	0/1:255,0,104:.:.:.:.:.	0/1:255,0,188:.:.:.:.:.	0/1:255,0,115:.:.:.:.:.	0/1:255,0,9:.:.:.:.:.	17	36	40	19	36	26	13	18	39	22	CACTIG010000023.1	5774101	5852604	NC_048332.1|43940289|44023783|-1|XM_034012731.2|XP_033868622.1|alpha-1,6-mannosylglycoprotein_6-beta-N-acetylglucosaminyltransferase,_transcript_variant_X1|83495	0
CACTIG010000023.1	6889337	.	cat	c	219.417	DEL	AC=10;AD=0,5;ADF=0,3;ADR=0,2;AN=10;DP=55;DP4=0,0,11,13;FS=0;IDV=8;IMF=0.888889;MQ=60;MQ0F=0;MQBZ=-0.392232;MQSBZ=-1;RPBZ=-1.54919;SGB=-0.590765;VDB=0.018555;DEL;INDEL;TV	1/1:188,15,0:5:0:0,1:0,4:0,5	1/1:84,9,0:3:0:0,1:0,2:0,3	1/1:122,12,0:4:0:0,3:0,1:0,4	1/1:249,21,0:7:0:0,3:0,4:0,7	1/1:191,15,0:5:0:0,3:0,2:0,5	./.:.:.:.:.:.:.	./.:.:.:.:.:.:.	./.:.:.:.:.:.:.	./.:.:.:.:.:.:.	./.:.:.:.:.:.:.	5	6	4	4	10	9	12	7	15	13	CACTIG010000023.1	7067777	7142067	NC_048332.1|42589278|42658598|-1|XM_034924500.1|XP_034780391.1|glycosyltransferase-like_domain-containing_protein_1|69321	178440
CACTIG010000023.1	7087921	.	T	G	225.417	SNP	AC=20;AD=7,15;ADF=3,7;ADR=4,8;AN=30;BQBZ=1.04978;DP=291;DP4=24,37,110,109;FS=0;MQ=60;MQ0F=0;MQBZ=-0.801784;MQSBZ=-1.50349;RPBZ=0.29277;SGB=-0.651104;VDB=0.621812;SNP;TV	1/1:213,24,0:8:0:0,4:0,4:0,8	1/1:255,72,0:24:0:0,11:0,13:0,24	1/1:255,36,0:12:0:0,6:0,6:0,12	1/1:255,90,0:30:0:0,14:0,16:0,30	1/1:255,57,0:19:0:0,7:0,12:0,19	0/1:198,0,42:.:.:.:.:.	0/1:245,0,183:.:.:.:.:.	0/1:255,0,101:.:.:.:.:.	0/1:167,0,137:.:.:.:.:.	0/1:255,0,146:.:.:.:.:.	11	22	31	13	26	8	27	12	32	20	CACTIG010000023.1	7067777	7142067	NC_048332.1|42589278|42658598|-1|XM_034924500.1|XP_034780391.1|glycosyltransferase-like_domain-containing_protein_1|69321	0
CACTIG010000023.1	7115768	.	A	C	225.417	SNP	AC=20;AD=4,30;ADF=1,15;ADR=3,15;AN=30;BQBZ=1.35094;DP=502;DP4=24,26,239,192;FS=0;MQ=60;MQ0F=0;MQBZ=-0.48795;MQSBZ=0.888523;RPBZ=-1.59615;SCBZ=1.5916;SGB=-0.693132;VDB=0.297028;SNP;TV	1/1:255,102,0:34:0:0,16:0,18:0,34	1/1:255,102,0:34:0:0,19:0,15:0,34	1/1:255,102,0:34:0:0,18:0,16:0,34	1/1:255,111,0:37:0:0,25:0,12:0,37	1/1:255,90,0:30:0:0,13:0,17:0,30	0/1:255,0,71:.:.:.:.:.	0/1:255,0,102:.:.:.:.:.	0/1:255,0,61:.:.:.:.:.	0/1:255,0,57:.:.:.:.:.	0/1:255,0,27:.:.:.:.:.	29	34	43	38	37	38	44	40	40	33	CACTIG010000023.1	7067777	7142067	NC_048332.1|42589278|42658598|-1|XM_034924500.1|XP_034780391.1|glycosyltransferase-like_domain-containing_protein_1|69321	0
CACTIG010000023.1	7119329	.	C	T	225.417	SNP	AC=20;AD=9,7;ADF=6,5;ADR=3,2;AN=30;BQBZ=1.04032;DP=290;DP4=42,40,93,101;FS=0;MQ=40;MQ0F=0;MQBZ=-1.48031;MQSBZ=-1.49287;RPBZ=1.15124;SCBZ=-0.963624;SGB=-0.693021;VDB=0.320473;SNP;TS	1/1:255,81,0:27:0:0,17:0,10:0,27	1/1:255,63,0:21:0:0,9:0,12:0,21	1/1:255,45,0:15:0:0,8:0,7:0,15	1/1:255,78,0:26:0:0,11:0,15:0,26	1/1:242,39,0:13:0:0,6:0,7:0,13	0/1:194,0,163:.:.:.:.:.	0/1:255,0,130:.:.:.:.:.	0/1:63,0,239:.:.:.:.:.	0/1:98,0,195:.:.:.:.:.	0/1:118,0,191:.:.:.:.:.	16	31	16	13	16	28	23	17	30	14	CACTIG010000023.1	7067777	7142067	NC_048332.1|42589278|42658598|-1|XM_034924500.1|XP_034780391.1|glycosyltransferase-like_domain-containing_protein_1|69321	0
CACTIG010000023.1	7320046	.	g	gT	226.23	INS	AC=14;AD=10,11;ADF=6,3;ADR=4,8;AN=18;DP=199;DP4=61,44,51,33;FS=0;IDV=9;IMF=0.428571;MQ=32;MQ0F=0;MQBZ=0.0752923;MQSBZ=-0.2965;RPBZ=0.248977;SGB=-0.662043;VDB=0.759018;INDEL;INS;TV	1/1:111,2,0:20:4:4,6:7,3:11,9	1/1:131,4,0:21:8:10,2:4,5:14,7	1/1:145,3,0:25:11:8,9:7,1:15,10	1/1:181,5,0:28:0:11,8:6,3:17,11	1/1:253,15,0:21:5:2,10:4,5:6,15	./.:.:.:.:.:.:.	0/1:66,0,30:.:.:.:.:.	./.:.:.:.:.:.:.	0/1:195,0,45:.:.:.:.:.	./.:.:.:.:.:.:.	11	5	17	19	19	10	8	11	14	16	CACTIG010000023.1	7184287	7346492	NC_048332.1|42385478|42547790|1|XM_034005889.2|XP_033861780.1|rho_GTPase-activating_protein_15-like|162313	0
CACTIG010000023.1	7342573	.	T	A	225.417	SNP	AC=20;AD=7,17;ADF=3,7;ADR=4,10;AN=30;BQBZ=1.08195;DP=371;DP4=38,36,124,155;FS=0;MQ=60;MQ0F=0;RPBZ=-0.164892;SGB=-0.69168;VDB=0.848202;SNP;TV	1/1:255,57,0:19:0:0,10:0,9:0,19	1/1:255,81,0:27:0:0,11:0,16:0,27	1/1:255,81,0:27:0:0,15:0,12:0,27	1/1:255,90,0:30:0:0,10:0,20:0,30	1/1:255,72,0:24:0:0,8:0,16:0,24	0/1:255,0,200:.:.:.:.:.	0/1:255,0,188:.:.:.:.:.	0/1:255,0,53:.:.:.:.:.	0/1:218,0,150:.:.:.:.:.	0/1:255,0,186:.:.:.:.:.	23	26	28	19	27	20	29	28	33	24	CACTIG010000023.1	7184287	7346492	NC_048332.1|42385478|42547790|1|XM_034005889.2|XP_033861780.1|rho_GTPase-activating_protein_15-like|162313	0
CACTIG010000023.1	8165691	.	t	tTTGTA	228.308	INS	AC=20;AD=11,26;ADF=8,20;ADR=3,6;AN=30;BQBZ=-2.00809;DP=376;DP4=53,38,137,106;FS=0;IDV=15;IMF=0.681818;MQ=60;MQ0F=0;MQBZ=1.07417;MQSBZ=1.20605;RPBZ=-2.65165;SCBZ=-3.1425;SGB=-0.688148;VDB=0.468417;INDEL;INS;TV	1/1:255,24,0:17:0:1,9:1,6:2,15	1/1:255,33,0:17:0:0,13:1,3:1,16	1/1:255,45,0:15:0:0,7:0,8:0,15	1/1:255,72,0:24:0:0,10:0,14:0,24	1/1:255,51,0:17:0:0,6:0,11:0,17	0/1:255,0,255:.:.:.:.:.	0/1:212,0,223:.:.:.:.:.	0/1:255,0,144:.:.:.:.:.	0/1:255,0,106:.:.:.:.:.	0/1:255,0,130:.:.:.:.:.	20	23	30	26	40	23	22	19	32	20	CACTIG010000023.1	8148629	8179137	NC_048332.1|42341725|42383877|1|XM_034006028.2|XP_033861919.1|kynureninase-like,_transcript_variant_X1|42153	0
CACTIG010000023.1	8166971	.	G	A	225.417	SNP	AC=20;AD=14,21;ADF=5,12;ADR=9,9;AN=30;BQBZ=0.66697;DP=464;DP4=46,48,195,164;FS=0;MQ=60;MQ0F=0;MQSBZ=0.9759;RPBZ=0.56716;SGB=-0.693054;VDB=0.818453;SNP;TS	1/1:255,84,0:28:0:0,15:0,13:0,28	1/1:255,90,0:30:0:0,10:0,20:0,30	1/1:255,87,0:29:0:0,19:0,10:0,29	1/1:255,123,0:41:0:0,21:0,20:0,41	1/1:255,69,0:23:0:0,6:0,17:0,23	0/1:255,0,73:.:.:.:.:.	0/1:255,0,194:.:.:.:.:.	0/1:255,0,228:.:.:.:.:.	0/1:255,0,156:.:.:.:.:.	0/1:255,0,222:.:.:.:.:.	21	36	35	30	36	28	31	29	41	23	CACTIG010000023.1	8148629	8179137	NC_048332.1|42341725|42383877|1|XM_034006028.2|XP_033861919.1|kynureninase-like,_transcript_variant_X1|42153	0
CACTIG010000023.1	8167661	.	A	T	225.417	SNP	AC=20;AD=8,18;ADF=4,10;ADR=4,8;AN=30;BQBZ=0.108691;DP=416;DP4=50,52,151,154;FS=0;MQ=60;MQ0F=0;MQBZ=-0.57735;MQSBZ=1.22094;RPBZ=0.444253;SCBZ=0.849837;SGB=-0.693021;VDB=0.50897;SNP;TV	1/1:255,81,0:27:0:0,11:0,16:0,27	1/1:255,63,0:21:0:0,12:0,9:0,21	1/1:255,72,0:24:0:0,14:0,10:0,24	1/1:255,63,0:21:0:0,11:0,10:0,21	1/1:255,48,0:16:0:0,7:0,9:0,16	0/1:255,0,209:.:.:.:.:.	0/1:255,0,104:.:.:.:.:.	0/1:255,0,240:.:.:.:.:.	0/1:255,0,190:.:.:.:.:.	0/1:255,0,150:.:.:.:.:.	28	31	32	40	28	28	23	24	22	16	CACTIG010000023.1	8148629	8179137	NC_048332.1|42341725|42383877|1|XM_034006028.2|XP_033861919.1|kynureninase-like,_transcript_variant_X1|42153	0
CACTIG010000023.1	8167664	.	A	G	225.417	SNP	AC=20;AD=8,21;ADF=4,13;ADR=4,8;AN=30;BQBZ=0.943141;DP=423;DP4=54,50,156,151;FS=0;MQ=60;MQ0F=0;MQBZ=-0.57735;MQSBZ=1.27942;RPBZ=0.964592;SCBZ=0.907485;SGB=-0.692831;VDB=0.282448;SNP;TS	1/1:255,72,0:24:0:0,10:0,14:0,24	1/1:255,66,0:22:0:0,12:0,10:0,22	1/1:255,75,0:25:0:0,14:0,11:0,25	1/1:255,63,0:21:0:0,12:0,9:0,21	1/1:255,51,0:17:0:0,8:0,9:0,17	0/1:255,0,205:.:.:.:.:.	0/1:255,0,127:.:.:.:.:.	0/1:255,0,255:.:.:.:.:.	0/1:255,0,199:.:.:.:.:.	0/1:255,0,155:.:.:.:.:.	29	31	32	39	30	25	26	25	22	17	CACTIG010000023.1	8148629	8179137	NC_048332.1|42341725|42383877|1|XM_034006028.2|XP_033861919.1|kynureninase-like,_transcript_variant_X1|42153	0
CACTIG010000023.1	8167744	.	A	C	225.417	SNP	AC=20;AD=11,21;ADF=4,13;ADR=7,8;AN=30;BQBZ=-2.58156;DP=499;DP4=42,40,203,200;FS=0;MQ=60;MQ0F=0;MQBZ=-0.883929;MQSBZ=1.07417;RPBZ=-2.05624;SGB=-0.693021;VDB=0.917226;SNP;TV	1/1:255,81,0:27:0:0,10:0,17:0,27	1/1:255,93,0:31:0:0,16:0,15:0,31	1/1:255,78,0:26:0:0,15:0,11:0,26	1/1:255,84,0:28:0:0,13:0,15:0,28	1/1:255,75,0:25:0:0,13:0,12:0,25	0/1:255,0,72:.:.:.:.:.	0/1:255,0,111:.:.:.:.:.	0/1:255,0,94:.:.:.:.:.	0/1:255,0,188:.:.:.:.:.	0/1:255,0,227:.:.:.:.:.	30	37	32	49	33	28	34	27	31	26	CACTIG010000023.1	8148629	8179137	NC_048332.1|42341725|42383877|1|XM_034006028.2|XP_033861919.1|kynureninase-like,_transcript_variant_X1|42153	0
CACTIG010000023.1	8167749	.	T	C	225.417	SNP	AC=20;AD=10,22;ADF=4,14;ADR=6,8;AN=30;BQBZ=1.82607;DP=502;DP4=46,46,197,195;FS=0;MQ=60;MQ0F=0;MQBZ=-0.862439;MQSBZ=1.0351;RPBZ=-0.607004;SGB=-0.692914;VDB=0.36154;SNP;TS	1/1:255,75,0:25:0:0,9:0,16:0,25	1/1:255,87,0:29:0:0,13:0,16:0,29	1/1:255,90,0:30:0:0,16:0,14:0,30	1/1:255,87,0:29:0:0,14:0,15:0,29	1/1:255,75,0:25:0:0,13:0,12:0,25	0/1:255,0,230:.:.:.:.:.	0/1:255,0,93:.:.:.:.:.	0/1:255,0,139:.:.:.:.:.	0/1:255,0,173:.:.:.:.:.	0/1:255,0,202:.:.:.:.:.	31	36	34	48	33	26	31	32	32	26	CACTIG010000023.1	8148629	8179137	NC_048332.1|42341725|42383877|1|XM_034006028.2|XP_033861919.1|kynureninase-like,_transcript_variant_X1|42153	0
CACTIG010000023.1	8167942	.	A	T	225.417	SNP	AC=20;AD=8,28;ADF=5,13;ADR=3,15;AN=30;BQBZ=2.88426;DP=487;DP4=48,30,202,192;FS=0;MQ=60;MQ0F=0;MQBZ=-0.891618;MQSBZ=1.10744;RPBZ=-0.474518;SCBZ=0.766652;SGB=-0.692914;VDB=0.778964;SNP;TV	1/1:255,75,0:25:0:0,9:0,16:0,25	1/1:255,63,0:21:0:0,10:0,11:0,21	1/1:255,99,0:33:0:0,13:0,20:0,33	1/1:255,87,0:29:0:0,21:0,8:0,29	1/1:255,72,0:24:0:0,15:0,9:0,24	0/1:255,0,79:.:.:.:.:.	0/1:255,0,98:.:.:.:.:.	0/1:255,0,103:.:.:.:.:.	0/1:255,0,184:.:.:.:.:.	0/1:255,0,109:.:.:.:.:.	37	27	30	45	43	32	23	36	31	26	CACTIG010000023.1	8148629	8179137	NC_048332.1|42341725|42383877|1|XM_034006028.2|XP_033861919.1|kynureninase-like,_transcript_variant_X1|42153	0
CACTIG010000023.1	8170294	.	t	tGTTTTTAAACC	228.236	INS	AC=16;AD=14,7;ADF=6,5;ADR=8,2;AN=22;DP=267;DP4=45,38,59,60;FS=0;IDV=16;IMF=0.666667;MQ=60;MQ0F=0;RPBZ=-2.95096;SCBZ=-3.45063;SGB=-0.689466;VDB=0.000475397;INDEL;INS;TV	1/1:255,6,0:19:0:2,9:1,7:3,16	1/1:255,33,0:11:0:0,5:0,6:0,11	1/1:255,16,0:22:0:1,6:1,14:2,20	1/1:255,5,0:17:3:2,9:0,6:2,15	1/1:255,51,0:17:0:0,10:0,7:0,17	./.:.:.:.:.:.:.	0/1:188,0,216:.:.:.:.:.	./.:.:.:.:.:.:.	0/1:114,0,255:.:.:.:.:.	0/1:162,0,255:.:.:.:.:.	22	24	27	25	28	25	15	26	29	20	CACTIG010000023.1	8148629	8179137	NC_048332.1|42341725|42383877|1|XM_034006028.2|XP_033861919.1|kynureninase-like,_transcript_variant_X1|42153	0
CACTIG010000023.1	8338810	.	C	CAT	228.411	INS	AC=18;AD=8,14;ADF=6,5;ADR=2,9;AN=26;BQBZ=-1.72651;DP=335;DP4=59,31,98,79;FS=0;IDV=17;IMF=0.772727;MQ=60;MQ0F=0;RPBZ=-0.744708;SCBZ=-2.66905;SGB=-0.690438;VDB=0.122483;INDEL;INS;TV	1/1:255,51,0:17:0:0,12:0,5:0,17	1/1:255,0,0:23:7:3,9:0,11:3,20	1/1:255,31,0:18:3:0,7:2,9:2,16	1/1:255,33,0:11:0:0,7:0,4:0,11	1/1:199,9,0:8:0:0,5:1,2:1,7	0/1:255,0,188:.:.:.:.:.	0/1:236,0,12:.:.:.:.:.	0/1:255,0,187:.:.:.:.:.	0/1:255,0,116:.:.:.:.:.	./.:.:.:.:.:.:.	31	12	32	23	19	19	24	18	12	10	CACTIG010000023.1	8310501	8449643	NC_048332.1|41262083|41405326|-1|XM_034000206.2|XP_033856097.1|acid-sensing_ion_channel_4-A-like,_transcript_variant_X2|143244	0
CACTIG010000023.1	8501728	.	C	T	225.417	SNP	AC=20;AD=13,17;ADF=7,9;ADR=6,8;AN=30;BQBZ=0.133788;DP=362;DP4=52,62,108,127;FS=0;MQ=59;MQ0F=0;MQSBZ=-1.46385;RPBZ=-1.36804;SCBZ=1.60409;SGB=-0.692562;VDB=0.606361;SNP;TS	1/1:255,66,0:22:0:0,15:0,7:0,22	1/1:255,51,0:17:0:0,5:0,12:0,17	1/1:255,66,0:22:0:0,11:0,11:0,22	1/1:255,48,0:16:0:0,10:0,6:0,16	1/1:255,72,0:24:0:0,13:0,11:0,24	0/1:189,0,219:.:.:.:.:.	0/1:255,0,148:.:.:.:.:.	0/1:209,0,255:.:.:.:.:.	0/1:199,0,202:.:.:.:.:.	0/1:255,0,255:.:.:.:.:.	20	31	25	22	32	26	23	22	17	25	CACTIG010000023.1	8495184	8509560	NC_048332.1|41202112|41216516|-1|XM_034021697.2|XP_033877588.1|protein_Wnt-6-like|14405	0
CACTIG010000023.1	8814830	.	C	T	225.417	SNP	AC=20;AD=8,33;ADF=5,14;ADR=3,19;AN=30;BQBZ=-0.421332;DP=442;DP4=32,50,167,180;FS=0;MQ=59;MQ0F=0;MQBZ=-0.591608;MQSBZ=0.942809;RPBZ=0.598085;SCBZ=0.957427;SGB=-0.693132;VDB=0.494069;SNP;TS	1/1:255,102,0:34:0:0,18:0,16:0,34	1/1:255,60,0:20:0:0,12:0,8:0,20	1/1:255,72,0:24:0:0,11:0,13:0,24	1/1:255,93,0:31:0:0,15:0,16:0,31	1/1:255,72,0:24:0:0,17:0,7:0,24	0/1:252,0,212:.:.:.:.:.	0/1:255,0,135:.:.:.:.:.	0/1:255,0,109:.:.:.:.:.	0/1:255,0,103:.:.:.:.:.	0/1:255,0,114:.:.:.:.:.	30	24	28	30	44	34	26	28	33	27	CACTIG010000023.1	8647812	8818463	NC_048332.1|40896525|41066362|1|XM_034014505.2|XP_033870396.2|kalirin,_transcript_variant_X2|169838	0
CACTIG010000023.1	8970527	.	g	gCGTTA	228.321	INS	AC=20;AD=21,10;ADF=7,2;ADR=14,8;AN=30;DP=430;DP4=61,75,119,123;FS=0;IDV=18;IMF=0.818182;MQ=52;MQ0F=0;MQBZ=1.82385;MQSBZ=1.3842;RPBZ=-3.07496;SCBZ=-4.55676;SGB=-0.691153;VDB=0.0518964;INDEL;INS;TV	1/1:255,54,0:18:0:0,10:0,8:0,18	1/1:255,48,0:16:0:0,7:0,9:0,16	1/1:255,69,0:23:0:0,15:0,8:0,23	1/1:255,54,0:30:0:1,16:1,12:2,28	1/1:255,57,0:19:0:0,5:0,14:0,19	0/1:255,0,17:.:.:.:.:.	0/1:255,0,37:.:.:.:.:.	0/1:255,0,246:.:.:.:.:.	0/1:196,0,255:.:.:.:.:.	0/1:190,0,255:.:.:.:.:.	25	23	40	32	32	22	23	29	35	21	CACTIG010000023.1	8938761	9003209	NC_048332.1|40711196|40776484|-1|XM_034005223.2|XP_033861114.2|formin-like_protein_2,_transcript_variant_X3|65289	0
CACTIG010000023.1	9129567	.	T	A	228.37	SNP	AC=20;AD=6,20;ADF=3,6;ADR=3,14;AN=30;BQBZ=3.21;DP=382;DP4=39,48,97,122;FS=0;MQ=60;MQ0F=0;RPBZ=-0.970857;SGB=-0.680642;VDB=0.204027;SNP;TV	1/1:243,14,0:16:11:4,4:0,8:4,12	1/1:255,35,0:19:0:1,5:1,12:2,17	1/1:255,51,0:17:0:0,9:0,8:0,17	1/1:212,0,0:15:0:2,4:3,6:5,10	1/1:255,81,0:27:0:0,13:0,14:0,27	0/1:255,0,71:.:.:.:.:.	0/1:181,0,97:.:.:.:.:.	0/1:255,0,255:.:.:.:.:.	0/1:187,0,177:.:.:.:.:.	0/1:255,0,100:.:.:.:.:.	23	24	36	17	30	23	22	28	31	35	CACTIG010000023.1	9090099	9122764	NC_048332.1|40590016|40622507|-1|XM_034014775.2|XP_033870666.2|polypeptide_N-acetylgalactosaminyltransferase_13-like|32492	6803
CACTIG010000023.1	9132974	.	T	A	225.417	SNP	AC=20;AD=9,35;ADF=5,12;ADR=4,23;AN=30;BQBZ=-0.264842;DP=429;DP4=46,52,151,177;FS=0;MQ=54;MQ0F=0;MQBZ=-1.23251;MQSBZ=1.08819;RPBZ=1.26188;SCBZ=1.23188;SGB=-0.693097;VDB=0.104283;SNP;TV	1/1:255,90,0:30:0:0,15:0,15:0,30	1/1:255,69,0:23:0:0,12:0,11:0,23	1/1:255,66,0:22:0:0,13:0,9:0,22	1/1:255,90,0:30:0:0,12:0,18:0,30	1/1:255,57,0:19:0:0,9:0,10:0,19	0/1:255,0,164:.:.:.:.:.	0/1:255,0,121:.:.:.:.:.	0/1:255,0,255:.:.:.:.:.	0/1:255,0,189:.:.:.:.:.	0/1:255,0,138:.:.:.:.:.	28	26	33	24	44	30	24	22	30	20	CACTIG010000023.1	9138888	9164435	NC_048332.1|40545970|40573792|-1|XM_034014781.2|XP_033870672.1|G_protein-activated_inward_rectifier_potassium_channel_1-like|27823	5914
CACTIG010000023.1	9133905	.	T	A	228.195	SNP	AC=20;AD=4,28;ADF=0,15;ADR=4,13;AN=30;BQBZ=-0.121967;DP=426;DP4=35,48,181,152;FS=0;MQ=60;MQ0F=0;RPBZ=-0.674966;SGB=-0.692914;VDB=0.732338;SNP;TV	1/1:255,75,0:25:0:0,14:0,11:0,25	1/1:255,57,0:19:0:0,10:0,9:0,19	1/1:255,78,0:26:0:0,12:0,14:0,26	1/1:255,72,0:24:0:0,9:0,15:0,24	1/1:255,17,0:18:0:1,12:0,5:1,17	0/1:255,0,226:.:.:.:.:.	0/1:255,0,137:.:.:.:.:.	0/1:255,0,78:.:.:.:.:.	0/1:255,0,246:.:.:.:.:.	0/1:255,0,28:.:.:.:.:.	30	25	34	33	33	26	21	27	25	19	CACTIG010000023.1	9138888	9164435	NC_048332.1|40545970|40573792|-1|XM_034014781.2|XP_033870672.1|G_protein-activated_inward_rectifier_potassium_channel_1-like|27823	4983
CACTIG010000023.1	9135375	.	A	G	225.417	SNP	AC=20;AD=9,29;ADF=4,17;ADR=5,12;AN=30;BQBZ=0.105055;DP=502;DP4=60,42,206,176;FS=0;MQ=59;MQ0F=0;MQBZ=-0.564076;MQSBZ=-0.935414;RPBZ=-0.101942;SGB=-0.693097;VDB=0.833544;SNP;TS	1/1:255,90,0:30:0:0,14:0,16:0,30	1/1:255,108,0:36:0:0,18:0,18:0,36	1/1:255,42,0:14:0:0,7:0,7:0,14	1/1:255,60,0:20:0:0,12:0,8:0,20	1/1:255,66,0:22:0:0,9:0,13:0,22	0/1:255,0,147:.:.:.:.:.	0/1:255,0,117:.:.:.:.:.	0/1:255,0,218:.:.:.:.:.	0/1:255,0,218:.:.:.:.:.	0/1:255,0,163:.:.:.:.:.	33	53	34	30	39	32	36	14	21	23	CACTIG010000023.1	9138888	9164435	NC_048332.1|40545970|40573792|-1|XM_034014781.2|XP_033870672.1|G_protein-activated_inward_rectifier_potassium_channel_1-like|27823	3513
CACTIG010000023.1	9644626	.	T	G,A	193.062	SNP	AC=14,4;AD=6,11,7;ADF=5,5,3;ADR=1,6,4;AN=26;BQBZ=1.87683;DP=177;DP4=40,17,63,52;FS=0;MQ=35;MQ0F=0;MQBZ=1.73785;MQSBZ=-1.13715;RPBZ=-0.542725;SCBZ=1.43146;SGB=-0.670168;VDB=0.909421;SNP;TV	1/1:188,32,8,.,.,.:10:0:0,6,.:0,2,.:0,8,.	1/1:220,30,0,.,.,.:10:0:0,7,.:0,3,.:0,10,.	1/1:182,24,0,.,.,.:9:0:0,4,.:0,4,.:0,8,.	1/1:150,25,4,.,.,.:8:0:0,5,.:0,2,.:0,7,.	1/1:205,31,0,.,.,.:16:0:0,11,.:1,2,.:1,13,.	./.:.:.:.:.:.:.	0/2:67,.,.,0,.,47:.:.:.:.:.	0/1:62,0,255,.,.,.:.:.:.:.:.	0/2:111,.,.,0,.,132:.:.:.:.:.	0/1:226,0,124,.,.,.:.:.:.:.:.	9	12	25	16	18	10	12	15	11	18	CACTIG010000023.1	9629955	9689381	NC_048332.1|40017554|40077139|-1|XM_034019578.2|XP_033875469.2|plakophilin-4-like,_transcript_variant_X2|59586	0
CACTIG010000023.1	9645518	.	T	G	225.417	SNP	AC=20;AD=6,24;ADF=3,12;ADR=3,12;AN=30;BQBZ=-0.0394055;DP=441;DP4=40,52,176,155;FS=0;MQ=60;MQ0F=0;RPBZ=0.522233;SCBZ=-1.41421;SGB=-0.692067;VDB=0.435737;SNP;TV	1/1:255,60,0:20:0:0,10:0,10:0,20	1/1:255,84,0:28:0:0,15:0,13:0,28	1/1:255,93,0:31:0:0,12:0,19:0,31	1/1:255,90,0:30:0:0,15:0,15:0,30	1/1:255,66,0:22:0:0,16:0,6:0,22	0/1:255,0,134:.:.:.:.:.	0/1:255,0,50:.:.:.:.:.	0/1:104,0,255:.:.:.:.:.	0/1:255,0,78:.:.:.:.:.	0/1:255,0,86:.:.:.:.:.	24	32	35	34	31	23	30	35	33	26	CACTIG010000023.1	9629955	9689381	NC_048332.1|40017554|40077139|-1|XM_034019578.2|XP_033875469.2|plakophilin-4-like,_transcript_variant_X2|59586	0
CACTIG010000023.1	9645875	.	A	G	225.417	SNP	AC=20;AD=11,27;ADF=8,14;ADR=3,13;AN=30;BQBZ=0.930641;DP=430;DP4=54,74,130,163;FS=0;MQ=58;MQ0F=0;MQBZ=-1.68415;MQSBZ=1.35401;RPBZ=0.857522;SCBZ=-0.784965;SGB=-0.690438;VDB=0.832989;SNP;TS	1/1:255,51,0:17:0:0,6:0,11:0,17	1/1:255,75,0:25:0:0,12:0,13:0,25	1/1:255,57,0:19:0:0,6:0,13:0,19	1/1:255,75,0:25:0:0,12:0,13:0,25	1/1:255,57,0:19:0:0,6:0,13:0,19	0/1:219,0,255:.:.:.:.:.	0/1:255,0,105:.:.:.:.:.	0/1:254,0,255:.:.:.:.:.	0/1:255,0,121:.:.:.:.:.	0/1:255,0,195:.:.:.:.:.	26	30	41	33	40	21	28	20	33	22	CACTIG010000023.1	9629955	9689381	NC_048332.1|40017554|40077139|-1|XM_034019578.2|XP_033875469.2|plakophilin-4-like,_transcript_variant_X2|59586	0
CACTIG010000023.1	9646822	.	T	A	225.417	SNP	AC=20;AD=5,21;ADF=2,16;ADR=3,5;AN=30;BQBZ=1.18596;DP=447;DP4=58,50,206,117;FS=0;MQ=60;MQ0F=0;RPBZ=-0.481125;SCBZ=1.15926;SGB=-0.693097;VDB=0.553947;SNP;TV	1/1:255,90,0:30:0:0,19:0,11:0,30	1/1:255,84,0:28:0:0,18:0,10:0,28	1/1:255,102,0:34:0:0,19:0,15:0,34	1/1:255,93,0:31:0:0,18:0,13:0,31	1/1:255,78,0:26:0:0,14:0,12:0,26	0/1:214,0,167:.:.:.:.:.	0/1:255,0,235:.:.:.:.:.	0/1:255,0,255:.:.:.:.:.	0/1:255,0,152:.:.:.:.:.	0/1:241,0,69:.:.:.:.:.	18	30	44	29	27	31	29	37	32	28	CACTIG010000023.1	9629955	9689381	NC_048332.1|40017554|40077139|-1|XM_034019578.2|XP_033875469.2|plakophilin-4-like,_transcript_variant_X2|59586	0
CACTIG010000023.1	9741010	.	A	ATG	228.41	INS	AC=20;AD=24,10;ADF=15,4;ADR=9,6;AN=30;DP=385;DP4=72,63,100,91;FS=0;IDV=20;IMF=0.869565;MQ=53;MQ0F=0;MQBZ=-0.985405;MQSBZ=1.15599;RPBZ=-2.74677;SCBZ=-3.11443;SGB=-0.691153;VDB=1.39878e-06;INDEL;INS;TV	1/1:255,54,0:18:0:0,8:0,10:0,18	1/1:255,60,0:20:0:0,9:0,11:0,20	1/1:255,39,0:13:0:0,6:0,7:0,13	1/1:255,70,0:28:0:0,16:1,11:1,27	1/1:255,33,0:11:0:0,3:0,8:0,11	0/1:172,0,159:.:.:.:.:.	0/1:200,0,161:.:.:.:.:.	0/1:255,0,108:.:.:.:.:.	0/1:255,0,185:.:.:.:.:.	0/1:190,0,237:.:.:.:.:.	22	24	22	32	42	25	25	18	35	21	CACTIG010000023.1	9704761	9820425	NC_048332.1|39888998|40002126|-1|XM_034003842.2|XP_033859733.2|protein_TANC1-like,_transcript_variant_X1|113129	0
CACTIG010000023.1	10026614	.	G	T	228.293	SNP	AC=20;AD=15,12;ADF=10,7;ADR=5,5;AN=30;BQBZ=1.60737;DP=387;DP4=59,42,120,138;FS=0;MQ=60;MQ0F=0;RPBZ=-1.30357;SGB=-0.692914;VDB=0.635811;SNP;TV	1/1:255,75,0:25:0:0,9:0,16:0,25	1/1:255,48,0:16:0:0,8:0,8:0,16	1/1:255,63,0:21:0:0,15:0,6:0,21	1/1:255,75,0:25:0:0,10:0,15:0,25	1/1:255,23,0:12:0:1,4:0,7:1,11	0/1:213,0,166:.:.:.:.:.	0/1:255,0,230:.:.:.:.:.	0/1:255,0,200:.:.:.:.:.	0/1:255,0,165:.:.:.:.:.	0/1:228,0,242:.:.:.:.:.	19	37	32	25	30	27	16	23	29	16	CACTIG010000023.1	10016794	10049310	NC_048332.1|39659154|39691768|1|XM_034016244.2|XP_033872135.1|RNA-binding_motif,_single-stranded-interacting_protein_1-like,_transcript_variant_X4|32615	0
CACTIG010000023.1	10026678	.	G	A	228.245	SNP	AC=20;AD=5,30;ADF=2,17;ADR=3,13;AN=30;BQBZ=-0.502378;DP=411;DP4=39,65,166,140;FS=0;MQ=60;MQ0F=0;RPBZ=1.66538;SCBZ=0.258199;SGB=-0.692831;VDB=0.401172;SNP;TS	1/1:255,38,0:25:0:0,13:1,11:1,24	1/1:252,7,0:14:0:1,6:0,7:1,13	1/1:255,3,0:23:3:0,9:2,12:2,21	1/1:255,42,0:32:3:0,15:2,15:2,30	1/1:255,54,0:18:0:0,9:0,9:0,18	0/1:209,0,195:.:.:.:.:.	0/1:255,0,253:.:.:.:.:.	0/1:255,0,118:.:.:.:.:.	0/1:232,0,200:.:.:.:.:.	0/1:255,0,47:.:.:.:.:.	24	35	28	31	36	26	14	23	33	19	CACTIG010000023.1	10016794	10049310	NC_048332.1|39659154|39691768|1|XM_034016244.2|XP_033872135.1|RNA-binding_motif,_single-stranded-interacting_protein_1-like,_transcript_variant_X4|32615	0
CACTIG010000023.1	10113300	.	G	A	225.417	SNP	AC=20;AD=10,32;ADF=9,19;ADR=1,13;AN=30;BQBZ=-1.21774;DP=499;DP4=50,20,204,203;FS=0;MQ=58;MQ0F=0;MQBZ=-0.646058;MQSBZ=-1.11803;RPBZ=-0.503817;SCBZ=0.447214;SGB=-0.691153;VDB=0.283435;SNP;TS	1/1:255,54,0:18:0:0,10:0,8:0,18	1/1:255,84,0:28:0:0,9:0,19:0,28	1/1:255,72,0:24:0:0,9:0,15:0,24	1/1:255,93,0:31:0:0,9:0,22:0,31	1/1:255,114,0:38:0:0,25:0,13:0,38	0/1:255,0,76:.:.:.:.:.	0/1:255,0,54:.:.:.:.:.	0/1:255,0,160:.:.:.:.:.	0/1:255,0,89:.:.:.:.:.	0/1:255,0,106:.:.:.:.:.	28	34	44	33	43	19	30	27	31	42	CACTIG010000023.1	10102222	10116499	NC_048332.1|39591702|39606007|-1|XM_034005560.2|XP_033861451.1|TRAF_family_member-associated_NFKB_activator,_transcript_variant_X3|14306	0
CACTIG010000023.1	10116320	.	T	A	121.415	SNP	AC=18;AD=4,3;ADF=2,2;ADR=2,1;AN=26;BQBZ=-0.781133;DP=129;DP4=20,10,56,39;FS=0;MQ=56;MQ0F=0;MQBZ=-0.707107;MQSBZ=-0.630548;RPBZ=1.81497;SGB=-0.680642;VDB=0.000408428;SNP;TV	1/1:151,36,0:12:0:0,6:0,6:0,12	1/1:111,21,0:7:0:0,5:0,2:0,7	1/1:66,12,0:4:0:0,3:0,1:0,4	1/1:137,21,0:7:0:0,4:0,3:0,7	1/1:111,21,0:7:0:0,4:0,3:0,7	./.:.:.:.:.:.:.	0/1:74,0,51:.:.:.:.:.	0/1:123,0,64:.:.:.:.:.	0/1:83,0,86:.:.:.:.:.	0/1:48,0,90:.:.:.:.:.	9	9	17	11	7	14	8	6	8	10	CACTIG010000023.1	10102222	10116499	NC_048332.1|39591702|39606007|-1|XM_034005560.2|XP_033861451.1|TRAF_family_member-associated_NFKB_activator,_transcript_variant_X3|14306	0
CACTIG010000023.1	10116321	.	C	G	119.415	SNP	AC=18;AD=4,3;ADF=2,2;ADR=2,1;AN=26;BQBZ=1.03775;DP=129;DP4=20,11,56,38;FS=0;MQ=56;MQ0F=0;MQBZ=-0.707107;MQSBZ=-0.630548;RPBZ=1.5;SGB=-0.680642;VDB=0.000408428;SNP;TV	1/1:149,36,0:12:0:0,6:0,6:0,12	1/1:111,21,0:7:0:0,5:0,2:0,7	1/1:66,12,0:4:0:0,3:0,1:0,4	1/1:104,18,0:7:0:0,4:0,2:0,6	1/1:80,10,0:7:0:0,4:1,2:1,6	./.:.:.:.:.:.:.	0/1:62,0,58:.:.:.:.:.	0/1:123,0,81:.:.:.:.:.	0/1:83,0,86:.:.:.:.:.	0/1:48,0,86:.:.:.:.:.	9	9	17	11	7	14	8	6	8	10	CACTIG010000023.1	10102222	10116499	NC_048332.1|39591702|39606007|-1|XM_034005560.2|XP_033861451.1|TRAF_family_member-associated_NFKB_activator,_transcript_variant_X3|14306	0
CACTIG010000023.1	10116323	.	A	G	128.416	SNP	AC=18;AD=4,3;ADF=2,2;ADR=2,1;AN=26;BQBZ=-2.3434;DP=133;DP4=20,12,56,39;FS=0;MQ=56;MQ0F=0;MQBZ=-0.707107;MQSBZ=-0.630548;RPBZ=1.81497;SGB=-0.680642;VDB=0.000408428;SNP;TS	1/1:158,36,0:12:0:0,6:0,6:0,12	1/1:111,21,0:7:0:0,5:0,2:0,7	1/1:66,12,0:4:0:0,3:0,1:0,4	1/1:131,21,0:7:0:0,4:0,3:0,7	1/1:111,21,0:7:0:0,4:0,3:0,7	./.:.:.:.:.:.:.	0/1:74,0,74:.:.:.:.:.	0/1:123,0,80:.:.:.:.:.	0/1:81,0,121:.:.:.:.:.	0/1:48,0,116:.:.:.:.:.	9	9	17	12	8	14	8	6	8	10	CACTIG010000023.1	10102222	10116499	NC_048332.1|39591702|39606007|-1|XM_034005560.2|XP_033861451.1|TRAF_family_member-associated_NFKB_activator,_transcript_variant_X3|14306	0
CACTIG010000023.1	10116324	.	T	G	128.416	SNP	AC=18;AD=4,3;ADF=2,2;ADR=2,1;AN=26;BQBZ=-2.38416;DP=133;DP4=20,12,56,39;FS=0;MQ=56;MQ0F=0;MQBZ=-0.707107;MQSBZ=-0.630548;RPBZ=1.81497;SGB=-0.680642;VDB=0.000408428;SNP;TV	1/1:158,36,0:12:0:0,6:0,6:0,12	1/1:111,21,0:7:0:0,5:0,2:0,7	1/1:66,12,0:4:0:0,3:0,1:0,4	1/1:133,21,0:7:0:0,4:0,3:0,7	1/1:111,21,0:7:0:0,4:0,3:0,7	./.:.:.:.:.:.:.	0/1:74,0,79:.:.:.:.:.	0/1:116,0,83:.:.:.:.:.	0/1:81,0,118:.:.:.:.:.	0/1:48,0,110:.:.:.:.:.	9	9	17	12	8	14	8	6	8	10	CACTIG010000023.1	10102222	10116499	NC_048332.1|39591702|39606007|-1|XM_034005560.2|XP_033861451.1|TRAF_family_member-associated_NFKB_activator,_transcript_variant_X3|14306	0
CACTIG010000023.1	10116325	.	T	A	128.416	SNP	AC=18;AD=4,3;ADF=2,2;ADR=2,1;AN=26;BQBZ=-2.35339;DP=133;DP4=20,12,56,39;FS=0;MQ=56;MQ0F=0;MQBZ=-0.707107;MQSBZ=-0.630548;RPBZ=1.81497;SGB=-0.680642;VDB=0.000408428;SNP;TV	1/1:158,36,0:12:0:0,6:0,6:0,12	1/1:108,21,0:7:0:0,5:0,2:0,7	1/1:66,12,0:4:0:0,3:0,1:0,4	1/1:111,21,0:7:0:0,4:0,3:0,7	1/1:111,21,0:7:0:0,4:0,3:0,7	./.:.:.:.:.:.:.	0/1:74,0,75:.:.:.:.:.	0/1:119,0,83:.:.:.:.:.	0/1:81,0,118:.:.:.:.:.	0/1:42,0,114:.:.:.:.:.	9	9	17	12	8	14	8	6	8	10	CACTIG010000023.1	10102222	10116499	NC_048332.1|39591702|39606007|-1|XM_034005560.2|XP_033861451.1|TRAF_family_member-associated_NFKB_activator,_transcript_variant_X3|14306	0
CACTIG010000023.1	10116326	.	T	C	128.416	SNP	AC=18;AD=4,3;ADF=2,2;ADR=2,1;AN=26;BQBZ=-2.38416;DP=133;DP4=20,12,56,39;FS=0;MQ=56;MQ0F=0;MQBZ=-0.707107;MQSBZ=-0.630548;RPBZ=1.81497;SGB=-0.680642;VDB=0.000408428;SNP;TS	1/1:158,36,0:12:0:0,6:0,6:0,12	1/1:111,21,0:7:0:0,5:0,2:0,7	1/1:66,12,0:4:0:0,3:0,1:0,4	1/1:137,21,0:7:0:0,4:0,3:0,7	1/1:104,21,0:7:0:0,4:0,3:0,7	./.:.:.:.:.:.:.	0/1:74,0,79:.:.:.:.:.	0/1:123,0,82:.:.:.:.:.	0/1:81,0,118:.:.:.:.:.	0/1:48,0,116:.:.:.:.:.	9	9	17	12	8	14	8	6	8	10	CACTIG010000023.1	10102222	10116499	NC_048332.1|39591702|39606007|-1|XM_034005560.2|XP_033861451.1|TRAF_family_member-associated_NFKB_activator,_transcript_variant_X3|14306	0
CACTIG010000023.1	10116478	.	A	G	228.316	SNP	AC=20;AD=6,24;ADF=4,8;ADR=2,16;AN=30;BQBZ=0.563905;DP=424;DP4=49,37,153,164;FS=0;MQ=41;MQ0F=0;MQBZ=2.35199;MQSBZ=-0.510219;RPBZ=0.398527;SCBZ=-1.96396;SGB=-0.690438;VDB=0.156685;SNP;TS	1/1:255,26,0:19:0:1,9:1,8:2,17	1/1:255,26,0:21:0:1,11:0,9:1,20	1/1:255,78,0:26:0:0,15:0,11:0,26	1/1:255,59,0:28:0:1,15:0,12:1,27	1/1:255,75,0:25:0:0,11:0,14:0,25	0/1:105,0,255:.:.:.:.:.	0/1:253,0,147:.:.:.:.:.	0/1:255,0,83:.:.:.:.:.	0/1:255,0,106:.:.:.:.:.	0/1:255,0,103:.:.:.:.:.	21	30	36	34	31	21	21	26	32	26	CACTIG010000023.1	10102222	10116499	NC_048332.1|39591702|39606007|-1|XM_034005560.2|XP_033861451.1|TRAF_family_member-associated_NFKB_activator,_transcript_variant_X3|14306	0
CACTIG010000023.1	12164721	.	C	CTATCAGA	206.417	INS	AC=20;AD=3,5;ADF=2,2;ADR=1,3;AN=30;BQBZ=1.49468;DP=303;DP4=11,7,33,29;FS=0;IDV=9;IMF=0.473684;MQ=60;MQ0F=0;MQBZ=-1.0202;MQSBZ=0.139771;RPBZ=0.24538;SCBZ=-0.642685;SGB=-0.556411;VDB=0.0139857;INDEL;INS;TV	1/1:171,0,1:5:0:0,4:1,0:1,4	1/1:140,9,0:3:0:0,2:0,1:0,3	1/1:142,9,0:3:0:0,2:0,1:0,3	1/1:224,15,0:9:0:1,5:0,3:1,8	1/1:236,18,0:6:0:0,2:0,4:0,6	0/1:111,0,13:.:.:.:.:.	0/1:138,0,7:.:.:.:.:.	0/1:97,0,38:.:.:.:.:.	0/1:136,0,40:.:.:.:.:.	0/1:132,0,18:.:.:.:.:.	21	25	17	22	28	20	18	16	22	18	CACTIG010000023.1	12170826	12188013	NC_048332.1|37517110|37534548|1|XM_034015131.2|XP_033871022.2|integral_membrane_protein_GPR155-like|17439	6105
CACTIG010000023.1	12199864	.	C	T	228.144	SNP	AC=20;AD=5,24;ADF=0,14;ADR=5,10;AN=30;BQBZ=0.934924;DP=524;DP4=33,38,198,225;FS=0;MQ=60;MQ0F=0;RPBZ=-0.406132;SCBZ=0.447214;SGB=-0.693097;VDB=0.889835;SNP;TS	1/1:255,90,0:30:0:0,13:0,17:0,30	1/1:255,13,0:38:3:2,14:1,21:3,35	1/1:255,81,0:27:0:0,15:0,12:0,27	1/1:255,21,0:32:0:1,18:1,12:2,30	1/1:255,87,0:29:0:0,14:0,15:0,29	0/1:255,0,73:.:.:.:.:.	0/1:255,0,82:.:.:.:.:.	0/1:255,0,80:.:.:.:.:.	0/1:255,0,170:.:.:.:.:.	0/1:255,0,57:.:.:.:.:.	31	40	36	41	29	37	40	33	33	30	CACTIG010000023.1	12189801	12205324	NC_048332.1|37499809|37515332|1|XM_034023302.2|XP_033879193.2|WAS/WASL-interacting_protein_family_member_1-like,_transcript_variant_X4|15524	0
CACTIG010000023.1	12525131	.	A	G	228.232	SNP	AC=20;AD=9,22;ADF=4,10;ADR=5,12;AN=30;BQBZ=-0.394259;DP=407;DP4=20,33,154,173;FS=0;MQ=60;MQ0F=0;RPBZ=-0.36163;SCBZ=0.553329;SGB=-0.693132;VDB=0.237417;SNP;TS	1/1:255,99,0:34:0:0,14:0,19:0,33	1/1:255,35,0:24:0:1,12:0,11:1,23	1/1:255,60,0:20:0:0,9:0,11:0,20	1/1:255,81,0:27:0:0,12:0,15:0,27	1/1:255,8,0:27:0:1,12:1,13:2,25	0/1:255,0,83:.:.:.:.:.	0/1:255,0,84:.:.:.:.:.	0/1:255,0,65:.:.:.:.:.	0/1:255,0,64:.:.:.:.:.	0/1:255,0,165:.:.:.:.:.	17	19	30	33	32	36	27	26	31	29	CACTIG010000023.1	12518399	12549123	NC_048332.1|37144040|37174985|-1|XM_034008213.2|XP_033864104.1|homeobox_protein_Hox-D3a-like,_transcript_variant_X4|30946	0
CACTIG010000023.1	13051363	.	a	aTTATTATTATTATTT	144.349	INS	AC=10;AD=0,4;ADF=0,3;ADR=0,1;AN=10;BQBZ=-1.65207;DP=55;DP4=3,1,13,12;FS=0;IDV=5;IMF=0.263158;MQ=37;MQ0F=0;MQBZ=0.372623;MQSBZ=-0.799269;RPBZ=-2.37578;SCBZ=-0.977268;SGB=-0.636426;VDB=0.0357887;INDEL;INS;TV	1/1:171,15,0:8:0:1,4:0,3:1,7	1/1:137,15,0:8:0:1,2:0,5:1,7	1/1:136,7,0:5:0:0,3:1,1:1,4	1/1:96,5,0:4:0:1,1:0,2:1,3	1/1:140,12,0:4:0:0,3:0,1:0,4	./.:.:.:.:.:.:.	./.:.:.:.:.:.:.	./.:.:.:.:.:.:.	./.:.:.:.:.:.:.	./.:.:.:.:.:.:.	10	7	6	8	8	19	14	7	8	8	CACTIG010000023.1	13101807	13151311	NC_048332.1|36549595|36598740|1|XM_034009777.2|XP_033865668.2|zinc_finger_protein_804A-like|49146	50444
CACTIG010000023.1	13767772	.	ga	g	228.344	DEL	AC=18;AD=8,17;ADF=3,13;ADR=5,4;AN=26;DP=323;DP4=33,41,128,77;FS=0;IDV=15;IMF=0.789474;MQ=60;MQ0F=0;RPBZ=-1.9;SCBZ=-2.29129;SGB=-0.688148;VDB=0.207427;DEL;INDEL;TV	1/1:239,34,0:16:0:1,7:0,8:1,15	1/1:181,0,5:19:3:2,11:2,4:4,15	1/1:245,45,0:15:0:0,5:0,10:0,15	1/1:255,83,0:34:0:0,21:1,12:1,33	1/1:255,63,0:21:0:0,14:0,7:0,21	0/1:170,0,79:.:.:.:.:.	0/1:195,0,68:.:.:.:.:.	0/1:143,0,113:.:.:.:.:.	0/1:182,0,42:.:.:.:.:.	./.:.:.:.:.:.:.	19	27	26	30	22	19	21	19	38	26	CACTIG010000023.1	13775362	13812423	NC_048332.1|35904755|35940061|-1|XM_034000936.2|XP_033856827.2|CWC22_spliceosome_associated_protein_homolog,_transcript_variant_X1|35307	7590
CACTIG010000023.1	15145155	.	A	C	225.422	SNP	AC=20;AD=6,22;ADF=3,13;ADR=3,9;AN=30;BQBZ=2.42891;DP=401;DP4=38,46,146,152;FS=0;MQ=50;MQ0F=0;MQBZ=0.323862;MQSBZ=-1.07615;RPBZ=-1.40523;SCBZ=1.26184;SGB=-0.692914;VDB=0.197167;SNP;TV	1/1:255,75,0:25:0:0,14:0,11:0,25	1/1:255,69,0:23:0:0,11:0,12:0,23	1/1:255,48,0:16:0:0,7:0,9:0,16	1/1:255,75,0:26:0:0,9:0,16:0,25	1/1:255,66,0:22:0:0,13:0,9:0,22	0/1:154,0,217:.:.:.:.:.	0/1:255,0,107:.:.:.:.:.	0/1:248,0,130:.:.:.:.:.	0/1:255,0,182:.:.:.:.:.	0/1:255,0,108:.:.:.:.:.	19	32	30	31	30	26	24	19	29	26	CACTIG010000023.1	15121733	15146445	NC_048332.1|34694728|34719474|1|XM_034016035.2|XP_033871926.2|fibronectin-like,_transcript_variant_X2|24747	0
CACTIG010000023.1	15389103	.	G	A	225.417	SNP	AC=10;AD=0,8;ADF=0,2;ADR=0,6;AN=10;DP=78;DP4=0,0,20,29;FS=0;MQ=60;MQ0F=0;SGB=-0.688148;VDB=0.414899;SNP;TS	1/1:255,45,0:15:0:0,6:0,9:0,15	1/1:102,9,0:3:0:0,2:0,1:0,3	1/1:255,42,0:14:0:0,6:0,8:0,14	1/1:214,27,0:9:0:0,4:0,5:0,9	1/1:198,24,0:8:0:0,2:0,6:0,8	./.:.:.:.:.:.:.	./.:.:.:.:.:.:.	./.:.:.:.:.:.:.	./.:.:.:.:.:.:.	./.:.:.:.:.:.:.	9	16	20	13	12	26	16	14	14	11	CACTIG010000023.1	15309177	15408242	NC_048332.1|34340666|34510562|-1|XM_034924489.1|XP_034780380.1|partitioning_defective_3_homolog_B-like|169897	0
CACTIG010000023.1	15398045	.	T	TCATCG	228.343	INS	AC=18;AD=14,5;ADF=7,2;ADR=7,3;AN=26;DP=291;DP4=58,38,84,60;FS=0;IDV=16;IMF=0.695652;MQ=60;MQ0F=0;RPBZ=0.0334822;SCBZ=-2.18614;SGB=-0.689466;VDB=0.275132;INDEL;INS;TV	1/1:255,1,0:20:3:4,12:0,4:4,16	1/1:255,36,0:12:0:0,10:0,2:0,12	1/1:255,45,0:15:0:0,8:0,7:0,15	1/1:255,36,0:12:0:0,7:0,5:0,12	1/1:255,45,0:15:0:0,9:0,6:0,15	0/1:182,0,37:.:.:.:.:.	0/1:255,0,27:.:.:.:.:.	0/1:219,0,79:.:.:.:.:.	./.:.:.:.:.:.:.	0/1:122,0,81:.:.:.:.:.	21	28	29	23	24	23	16	18	16	19	CACTIG010000023.1	15309177	15408242	NC_048332.1|34340666|34510562|-1|XM_034924489.1|XP_034780380.1|partitioning_defective_3_homolog_B-like|169897	0
CACTIG010000023.1	15863774	.	A	T	228.27	SNP	AC=20;AD=14,11;ADF=10,4;ADR=4,7;AN=30;BQBZ=1.0169;DP=410;DP4=75,38,162,117;FS=0;MQ=52;MQ0F=0;MQBZ=-0.782154;MQSBZ=0.150414;RPBZ=0.600513;SCBZ=-0.879463;SGB=-0.692914;VDB=0.94106;SNP;TV	1/1:255,43,0:26:0:1,12:0,13:1,25	1/1:255,60,0:20:0:0,11:0,9:0,20	1/1:255,28,0:18:0:1,8:0,9:1,17	1/1:255,60,0:20:0:0,9:0,11:0,20	1/1:255,81,0:27:0:0,18:0,9:0,27	0/1:255,0,92:.:.:.:.:.	0/1:255,0,123:.:.:.:.:.	0/1:158,0,255:.:.:.:.:.	0/1:255,0,76:.:.:.:.:.	0/1:235,0,253:.:.:.:.:.	26	40	36	30	30	32	23	19	21	33	CACTIG010000023.1	15849502	15853705	NC_048332.1|33928012|33932180|1|XM_034011454.2|XP_033867345.1|cytotoxic_T-lymphocyte_protein_4-like|4169	10069
CACTIG010000023.1	18007061	.	a	aAAAC,aACAC	225.417	INS	AC=10,20;AD=0,7,18;ADF=0,5,16;ADR=0,2,2;AN=30;DP=154;DP4=2,0,106,30;FS=0;IDV=10;IMF=1;MQ=49;MQ0F=0;MQBZ=-1.78665;MQSBZ=-0.848528;RPBZ=-2.04939;SCBZ=-2.80624;SGB=-0.670168;VDB=0.474122;INDEL;INS;TV	1/1:255,30,0,.,.,.:10:0:0,8,.:0,2,.:0,10,.	1/1:255,21,0,.,.,.:7:0:0,3,.:0,4,.:0,7,.	1/1:255,39,0,.,.,.:13:0:0,7,.:0,6,.:0,13,.	1/1:255,33,0,.,.,.:11:0:0,7,.:0,4,.:0,11,.	1/1:255,21,0,.,.,.:7:0:0,5,.:0,2,.:0,7,.	2/2:173,.,.,18,.,0:.:.:.:.:.	2/2:255,.,.,30,.,0:.:.:.:.:.	2/2:150,.,.,3,.,0:.:.:.:.:.	2/2:163,.,.,18,.,0:.:.:.:.:.	2/2:255,.,.,54,.,0:.:.:.:.:.	18	22	13	18	28	20	24	22	21	13	CACTIG010000023.1	18014949	18018826	NC_048332.1|31744195|31748105|1|XM_034000903.2|XP_033856794.2|leucine-rich_repeat-containing_protein_3-like|3911	7888
CACTIG010000023.1	18385602	.	C	T	225.417	SNP	AC=20;AD=8,9;ADF=6,5;ADR=2,4;AN=30;BQBZ=-0.220813;DP=336;DP4=40,16,162,109;FS=0;MQ=60;MQ0F=0;RPBZ=0.475923;SCBZ=0.0907218;SGB=-0.692562;VDB=0.723687;SNP;TS	1/1:255,66,0:22:0:0,7:0,15:0,22	1/1:255,96,0:32:0:0,15:0,17:0,32	1/1:255,63,0:21:0:0,14:0,7:0,21	1/1:255,54,0:18:0:0,10:0,8:0,18	1/1:255,66,0:22:0:0,18:0,4:0,22	0/1:255,0,75:.:.:.:.:.	0/1:255,0,102:.:.:.:.:.	0/1:255,0,95:.:.:.:.:.	0/1:234,0,53:.:.:.:.:.	0/1:150,0,159:.:.:.:.:.	26	20	28	20	17	22	34	23	19	23	CACTIG010000023.1	18354016	18386840	NC_048332.1|31374719|31407989|1|XM_034016107.2|XP_033871998.1|carboxy-terminal_domain_RNA_polymerase_II_polypeptide_A_small_phosphatase_1-like|33271	0
CACTIG010000023.1	19420161	.	A	T	228.189	SNP	AC=20;AD=5,15;ADF=3,7;ADR=2,8;AN=30;BQBZ=0;DP=312;DP4=31,26,131,93;FS=0;MQ=60;MQ0F=0;RPBZ=-1.62019;SCBZ=0.267261;SGB=-0.69168;VDB=0.957811;SNP;TV	1/1:255,57,0:19:0:0,12:0,7:0,19	1/1:255,57,0:19:0:0,10:0,9:0,19	1/1:236,27,0:9:0:0,4:0,5:0,9	1/1:255,57,0:19:0:0,11:0,8:0,19	1/1:255,8,0:15:0:1,8:0,6:1,14	0/1:156,0,190:.:.:.:.:.	0/1:247,0,24:.:.:.:.:.	0/1:255,0,210:.:.:.:.:.	0/1:255,0,72:.:.:.:.:.	0/1:255,0,106:.:.:.:.:.	18	15	34	24	21	24	22	13	21	16	CACTIG010000023.1	19218183	19429982	NC_048332.1|30305094|30511260|1|XM_034009542.2|XP_033865433.2|tensin-like,_transcript_variant_X1|206167	0
CACTIG010000023.1	20192807	.	T	A	225.417	SNP	AC=20;AD=7,20;ADF=4,8;ADR=3,12;AN=30;BQBZ=-0.863636;DP=377;DP4=32,28,150,147;FS=0;MQ=48;MQ0F=0;MQBZ=-1.5397;MQSBZ=-1.17164;RPBZ=-0.33469;SGB=-0.676189;VDB=0.652386;SNP;TV	1/1:248,33,0:11:0:0,8:0,3:0,11	1/1:255,54,0:18:0:0,9:0,9:0,18	1/1:255,75,0:25:0:0,16:0,9:0,25	1/1:255,66,0:22:0:0,8:0,14:0,22	1/1:255,75,0:25:0:0,15:0,10:0,25	0/1:255,0,32:.:.:.:.:.	0/1:247,0,73:.:.:.:.:.	0/1:255,0,163:.:.:.:.:.	0/1:173,0,142:.:.:.:.:.	0/1:255,0,136:.:.:.:.:.	25	22	42	15	33	11	21	27	23	26	CACTIG010000023.1	20178704	20220244	NC_048332.1|29503875|29545188|1|XM_034005769.2|XP_033861660.2|TRAF3-interacting_protein_1-like,_transcript_variant_X2|41314	0
CACTIG010000023.1	20201706	.	T	G	225.417	SNP	AC=20;AD=9,27;ADF=7,16;ADR=2,11;AN=30;BQBZ=-0.366508;DP=366;DP4=39,36,178,106;FS=0;MQ=60;MQ0F=0;RPBZ=0.0964735;SCBZ=0.957427;SGB=-0.692352;VDB=0.277929;SNP;TV	1/1:255,63,0:21:0:0,11:0,10:0,21	1/1:255,99,0:33:0:0,19:0,14:0,33	1/1:248,17,0:18:0:1,14:0,3:1,17	1/1:255,81,0:27:0:0,23:0,4:0,27	1/1:255,54,0:18:0:0,11:0,7:0,18	0/1:182,0,221:.:.:.:.:.	0/1:255,0,10:.:.:.:.:.	0/1:251,0,228:.:.:.:.:.	0/1:255,0,89:.:.:.:.:.	0/1:255,0,158:.:.:.:.:.	20	20	25	24	40	22	34	18	27	20	CACTIG010000023.1	20178704	20220244	NC_048332.1|29503875|29545188|1|XM_034005769.2|XP_033861660.2|TRAF3-interacting_protein_1-like,_transcript_variant_X2|41314	0
CACTIG010000023.1	20476103	.	C	T	225.417	SNP	AC=20;AD=11,28;ADF=6,8;ADR=5,20;AN=30;BQBZ=-0.514394;DP=504;DP4=54,54,172,212;FS=0;MQ=60;MQ0F=0;MQBZ=-0.551677;MQSBZ=0.134968;RPBZ=-0.0245279;SCBZ=0.551677;SGB=-0.693097;VDB=0.350476;SNP;TS	1/1:255,90,0:30:0:0,20:0,10:0,30	1/1:255,96,0:32:0:0,15:0,17:0,32	1/1:255,84,0:28:0:0,17:0,11:0,28	1/1:255,117,0:39:0:0,21:0,18:0,39	1/1:255,81,0:27:0:0,15:0,12:0,27	0/1:255,0,120:.:.:.:.:.	0/1:255,0,255:.:.:.:.:.	0/1:255,0,172:.:.:.:.:.	0/1:255,0,212:.:.:.:.:.	0/1:255,0,169:.:.:.:.:.	32	36	36	31	40	33	34	30	42	28	CACTIG010000023.1	20374985	20516764	NC_048332.1|29218956|29362375|1|XM_034012820.2|XP_033868711.2|double-stranded_RNA-specific_editase_1-like,_transcript_variant_X4|143420	0
CACTIG010000023.1	20477500	.	A	G	225.417	SNP	AC=20;AD=9,24;ADF=7,8;ADR=2,16;AN=30;BQBZ=-0.672007;DP=339;DP4=48,24,124,138;FS=0;MQ=60;MQ0F=0;RPBZ=2.23595;SGB=-0.691153;VDB=0.983692;SNP;TS	1/1:255,54,0:18:0:0,9:0,9:0,18	1/1:255,84,0:28:0:0,15:0,13:0,28	1/1:255,45,0:15:0:0,8:0,7:0,15	1/1:255,63,0:21:0:0,13:0,8:0,21	1/1:255,84,0:28:0:0,9:0,19:0,28	0/1:255,0,67:.:.:.:.:.	0/1:163,0,242:.:.:.:.:.	0/1:255,0,90:.:.:.:.:.	0/1:255,0,115:.:.:.:.:.	0/1:255,0,151:.:.:.:.:.	18	20	19	23	34	18	29	17	23	29	CACTIG010000023.1	20374985	20516764	NC_048332.1|29218956|29362375|1|XM_034012820.2|XP_033868711.2|double-stranded_RNA-specific_editase_1-like,_transcript_variant_X4|143420	0
CACTIG010000023.1	20514127	.	G	T	228.125	SNP	AC=20;AD=8,22;ADF=2,9;ADR=6,13;AN=30;BQBZ=0.70125;DP=453;DP4=44,46,159,187;FS=0;MQ=60;MQ0F=0;RPBZ=-0.370441;SGB=-0.693136;VDB=0.276336;SNP;TV	1/1:255,105,0:35:0:0,20:0,15:0,35	1/1:255,90,0:30:0:0,16:0,14:0,30	1/1:255,81,0:28:0:0,14:0,13:0,27	1/1:255,102,0:34:0:0,13:0,21:0,34	1/1:255,12,0:27:0:0,8:2,17:2,25	0/1:255,0,170:.:.:.:.:.	0/1:255,0,75:.:.:.:.:.	0/1:255,0,67:.:.:.:.:.	0/1:191,0,255:.:.:.:.:.	0/1:255,0,125:.:.:.:.:.	27	24	36	31	32	36	30	30	37	30	CACTIG010000023.1	20374985	20516764	NC_048332.1|29218956|29362375|1|XM_034012820.2|XP_033868711.2|double-stranded_RNA-specific_editase_1-like,_transcript_variant_X4|143420	0
CACTIG010000023.1	20539463	.	C	T	225.417	SNP	AC=20;AD=9,20;ADF=3,9;ADR=6,11;AN=30;BQBZ=-2.11605;DP=460;DP4=38,38,167,198;FS=0;MQ=60;MQ0F=0;MQBZ=1.58114;MQSBZ=-0.8044;RPBZ=-0.279893;SCBZ=0.491304;SGB=-0.693097;VDB=0.801823;SNP;TS	1/1:255,90,0:30:0:0,18:0,12:0,30	1/1:255,72,0:24:0:0,17:0,7:0,24	1/1:255,57,0:19:0:0,9:0,10:0,19	1/1:255,96,0:32:0:0,14:0,18:0,32	1/1:255,90,0:30:0:0,15:0,15:0,30	0/1:255,0,170:.:.:.:.:.	0/1:255,0,121:.:.:.:.:.	0/1:255,0,119:.:.:.:.:.	0/1:255,0,96:.:.:.:.:.	0/1:255,0,165:.:.:.:.:.	29	30	31	37	32	32	25	19	34	32	CACTIG010000023.1	20539898	20622657	NC_048332.1|29109820|29191729|1|XM_034004269.2|XP_033860160.1|protein_FAM207A-like,_transcript_variant_X3|81910	435
CACTIG010000023.1	20543391	.	C	T	228.213	SNP	AC=20;AD=3,28;ADF=1,12;ADR=2,16;AN=30;BQBZ=1.36139;DP=369;DP4=24,33,119,182;FS=0;MQ=60;MQ0F=0;RPBZ=1.47687;SGB=-0.693054;VDB=0.516023;SNP;TS	1/1:255,84,0:28:0:0,10:0,18:0,28	1/1:255,25,0:20:0:0,6:1,13:1,19	1/1:255,51,0:17:0:0,8:0,9:0,17	1/1:255,75,0:25:0:0,6:0,19:0,25	1/1:255,60,0:22:0:0,7:0,13:0,20	0/1:255,0,118:.:.:.:.:.	0/1:255,0,113:.:.:.:.:.	0/1:255,0,112:.:.:.:.:.	0/1:124,0,95:.:.:.:.:.	0/1:255,0,14:.:.:.:.:.	22	27	32	17	31	29	20	17	27	23	CACTIG010000023.1	20539898	20622657	NC_048332.1|29109820|29191729|1|XM_034004269.2|XP_033860160.1|protein_FAM207A-like,_transcript_variant_X3|81910	0
CACTIG010000023.1	20543581	.	G	C	225.417	SNP	AC=20;AD=4,19;ADF=4,9;ADR=0,10;AN=30;BQBZ=0.747156;DP=373;DP4=28,28,138,157;FS=0;MQ=60;MQ0F=0;MQBZ=-0.601448;MQSBZ=0.0534522;RPBZ=-0.0529455;SGB=-0.692562;VDB=0.144949;SNP;TV	1/1:255,66,0:22:0:0,10:0,12:0,22	1/1:255,51,0:17:0:0,7:0,10:0,17	1/1:255,60,0:20:0:0,7:0,13:0,20	1/1:255,81,0:27:0:0,18:0,9:0,27	1/1:255,75,0:25:0:0,13:0,12:0,25	0/1:255,0,45:.:.:.:.:.	0/1:255,0,191:.:.:.:.:.	0/1:255,0,149:.:.:.:.:.	0/1:255,0,53:.:.:.:.:.	0/1:255,0,53:.:.:.:.:.	20	24	32	29	23	22	18	22	28	31	CACTIG010000023.1	20539898	20622657	NC_048332.1|29109820|29191729|1|XM_034004269.2|XP_033860160.1|protein_FAM207A-like,_transcript_variant_X3|81910	0
CACTIG010000023.1	20544407	.	T	C	225.417	SNP	AC=20;AD=8,11;ADF=5,6;ADR=3,5;AN=30;BQBZ=0.934696;DP=355;DP4=40,14,192,95;FS=0;MQ=59;MQ0F=0;MQBZ=-0.408248;MQSBZ=-2.23607;RPBZ=0.36555;SCBZ=0.408248;SGB=-0.691153;VDB=0.993503;SNP;TS	1/1:255,54,0:18:0:0,15:0,3:0,18	1/1:255,72,0:24:0:0,14:0,10:0,24	1/1:255,36,0:12:0:0,8:0,4:0,12	1/1:255,75,0:25:0:0,15:0,10:0,25	1/1:255,54,0:18:0:0,8:0,10:0,18	0/1:195,0,7:.:.:.:.:.	0/1:255,0,58:.:.:.:.:.	0/1:255,0,145:.:.:.:.:.	0/1:255,0,70:.:.:.:.:.	0/1:202,0,161:.:.:.:.:.	16	36	28	32	20	21	27	16	26	18	CACTIG010000023.1	20539898	20622657	NC_048332.1|29109820|29191729|1|XM_034004269.2|XP_033860160.1|protein_FAM207A-like,_transcript_variant_X3|81910	0
CACTIG010000023.1	20548826	.	A	AT,ATT	225.417	INS	AC=16,4;AD=10,12,3;ADF=8,9,2;ADR=2,3,1;AN=30;DP=267;DP4=42,32,118,38;FS=0;IDV=11;IMF=1;MQ=60;MQ0F=0;RPBZ=1.78137;SCBZ=-0.6742;SGB=-0.676189;VDB=0.491564;INDEL;INS;TV	1/1:255,51,21,.,.,.:11:0:0,7,.:0,3,.:0,10,.	1/1:252,33,0,.,.,.:11:0:0,8,.:0,3,.:0,11,.	1/1:185,39,0,.,.,.:13:0:0,13,.:0,0,.:0,13,.	1/1:234,39,0,.,.,.:13:0:0,11,.:0,2,.:0,13,.	1/1:255,48,0,.,.,.:16:0:0,10,.:0,6,.:0,16,.	0/1:113,0,81,.,.,.:.:.:.:.:.	0/2:202,.,.,0,.,131:.:.:.:.:.	0/2:132,.,.,0,.,156:.:.:.:.:.	0/1:224,0,39,.,.,.:.:.:.:.:.	0/1:215,0,68,.,.,.:.:.:.:.:.	14	21	27	25	31	22	22	31	27	27	CACTIG010000023.1	20539898	20622657	NC_048332.1|29109820|29191729|1|XM_034004269.2|XP_033860160.1|protein_FAM207A-like,_transcript_variant_X3|81910	0
CACTIG010000023.1	20549161	.	T	C	225.417	SNP	AC=20;AD=10,26;ADF=6,9;ADR=4,17;AN=30;BQBZ=0.920263;DP=464;DP4=42,32,189,193;FS=0;MQ=60;MQ0F=0;RPBZ=1.35978;SGB=-0.693021;VDB=0.445617;SNP;TS	1/1:255,81,0:27:0:0,18:0,9:0,27	1/1:255,81,0:27:0:0,17:0,10:0,27	1/1:255,114,0:38:0:0,19:0,19:0,38	1/1:255,93,0:31:0:0,17:0,14:0,31	1/1:255,105,0:35:0:0,18:0,17:0,35	0/1:255,0,86:.:.:.:.:.	0/1:255,0,139:.:.:.:.:.	0/1:255,0,152:.:.:.:.:.	0/1:255,0,140:.:.:.:.:.	0/1:255,0,171:.:.:.:.:.	26	37	31	23	38	27	27	40	33	35	CACTIG010000023.1	20539898	20622657	NC_048332.1|29109820|29191729|1|XM_034004269.2|XP_033860160.1|protein_FAM207A-like,_transcript_variant_X3|81910	0
CACTIG010000023.1	20562962	.	C	T	225.417	SNP	AC=20;AD=5,20;ADF=3,10;ADR=2,10;AN=30;BQBZ=-0.522912;DP=377;DP4=36,18,178,138;FS=0;MQ=60;MQ0F=0;RPBZ=1.85571;SGB=-0.693079;VDB=0.185431;SNP;TS	1/1:255,87,0:29:0:0,21:0,8:0,29	1/1:255,90,0:30:0:0,17:0,13:0,30	1/1:255,54,0:18:0:0,7:0,11:0,18	1/1:255,105,0:35:0:0,15:0,20:0,35	1/1:255,66,0:22:0:0,10:0,12:0,22	0/1:224,0,103:.:.:.:.:.	0/1:255,0,67:.:.:.:.:.	0/1:255,0,100:.:.:.:.:.	0/1:255,0,120:.:.:.:.:.	0/1:255,0,87:.:.:.:.:.	21	26	27	25	26	31	31	18	35	24	CACTIG010000023.1	20539898	20622657	NC_048332.1|29109820|29191729|1|XM_034004269.2|XP_033860160.1|protein_FAM207A-like,_transcript_variant_X3|81910	0
CACTIG010000023.1	21516190	.	C	A	225.421	SNP	AC=20;AD=8,29;ADF=4,11;ADR=4,18;AN=30;BQBZ=-1.20661;DP=381;DP4=21,35,149,166;FS=0;MQ=48;MQ0F=0;MQBZ=-1.39499;MQSBZ=-0.771003;RPBZ=-1.41877;SCBZ=0.597614;SGB=-0.693021;VDB=0.267929;SNP;TV	1/1:255,81,0:27:0:0,10:0,17:0,27	1/1:255,84,0:28:0:0,10:0,18:0,28	1/1:255,57,0:19:0:0,11:0,8:0,19	1/1:255,87,0:30:0:0,17:0,12:0,29	1/1:255,0,5:23:0:1,10:1,11:2,21	0/1:251,0,140:.:.:.:.:.	0/1:255,0,86:.:.:.:.:.	0/1:255,0,40:.:.:.:.:.	0/1:255,0,10:.:.:.:.:.	0/1:255,0,128:.:.:.:.:.	20	21	28	21	38	27	30	22	30	23	CACTIG010000023.1	21537170	21540791	NC_048332.1|28211403|28215035|1|XM_034004640.2|XP_033860531.1|ADP-ribosylation_factor-like_4Cb|3633	20980
CACTIG010000023.1	22012697	.	C	T	225.417	SNP	AC=20;AD=13,7;ADF=7,3;ADR=6,4;AN=30;BQBZ=-0.317649;DP=230;DP4=28,56,62,71;FS=0;MQ=57;MQ0F=0;MQBZ=-0.774597;MQSBZ=0.471405;RPBZ=0.149071;SGB=-0.689466;VDB=0.562095;SNP;TS	1/1:255,48,0:16:0:0,6:0,10:0,16	1/1:223,24,0:8:0:0,4:0,4:0,8	1/1:147,18,0:6:0:0,1:0,5:0,6	1/1:192,21,0:7:0:0,4:0,3:0,7	1/1:255,72,0:24:0:0,11:0,13:0,24	0/1:130,0,73:.:.:.:.:.	0/1:161,0,189:.:.:.:.:.	0/1:205,0,204:.:.:.:.:.	0/1:153,0,135:.:.:.:.:.	0/1:147,0,239:.:.:.:.:.	8	21	20	16	21	16	8	7	7	27	CACTIG010000023.1	21916955	22030038	NC_048332.1|27712860|27826844|1|XM_034001923.2|XP_033857814.2|aryl_hydrocarbon_receptor-like|113985	0
CACTIG010000023.1	22120049	.	C	G	228.409	SNP	AC=20;AD=7,23;ADF=5,11;ADR=2,12;AN=30;BQBZ=1.74561;DP=400;DP4=26,31,161,165;FS=0;MQ=60;MQ0F=0;RPBZ=0.0990981;SCBZ=0.581571;SGB=-0.692352;VDB=0.349245;SNP;TV	1/1:255,63,0:21:0:0,11:0,10:0,21	1/1:255,72,0:24:0:0,11:0,13:0,24	1/1:255,54,0:18:0:0,9:0,9:0,18	1/1:255,90,0:35:0:0,21:1,13:1,34	1/1:255,1,0:23:7:2,9:0,12:2,21	0/1:255,0,73:.:.:.:.:.	0/1:255,0,157:.:.:.:.:.	0/1:255,0,26:.:.:.:.:.	0/1:255,0,88:.:.:.:.:.	0/1:255,0,115:.:.:.:.:.	19	36	25	25	32	25	26	18	39	24	CACTIG010000023.1	22059653	22114346	NC_048332.1|27635492|27691109|-1|XM_034021927.2|XP_033877818.1|NADH:ubiquinone_oxidoreductase_subunit_A10|55618	5703
CACTIG010000023.1	22128045	.	A	G	228.212	SNP	AC=20;AD=9,10;ADF=4,5;ADR=5,5;AN=30;BQBZ=-0.0880613;DP=356;DP4=45,32,101,169;FS=0;MQ=53;MQ0F=0;MQBZ=-0.852598;MQSBZ=1.22527;RPBZ=0.165198;SCBZ=0.408248;SGB=-0.692831;VDB=0.387564;SNP;TS	1/1:255,72,0:24:0:0,9:0,15:0,24	1/1:255,69,0:23:0:0,6:0,17:0,23	1/1:255,48,0:16:0:0,7:0,9:0,16	1/1:255,63,0:21:0:0,6:0,15:0,21	1/1:255,26,0:21:0:1,5:0,15:1,20	0/1:255,0,164:.:.:.:.:.	0/1:255,0,163:.:.:.:.:.	0/1:255,0,78:.:.:.:.:.	0/1:255,0,84:.:.:.:.:.	0/1:212,0,200:.:.:.:.:.	35	26	20	25	19	24	23	16	23	22	CACTIG010000023.1	22059653	22114346	NC_048332.1|27635492|27691109|-1|XM_034021927.2|XP_033877818.1|NADH:ubiquinone_oxidoreductase_subunit_A10|55618	13699
CACTIG010000023.1	22128047	.	T	G	228.206	SNP	AC=20;AD=11,10;ADF=5,5;ADR=6,5;AN=30;BQBZ=-0.596085;DP=352;DP4=47,34,98,164;FS=0;MQ=53;MQ0F=0;MQBZ=-0.852598;MQSBZ=1.42638;RPBZ=0.165198;SCBZ=0.408248;SGB=-0.692717;VDB=0.2968;SNP;TV	1/1:255,69,0:23:0:0,8:0,15:0,23	1/1:255,63,0:21:0:0,6:0,15:0,21	1/1:255,48,0:16:0:0,7:0,9:0,16	1/1:255,60,0:20:0:0,6:0,14:0,20	1/1:255,26,0:21:0:1,5:0,15:1,20	0/1:255,0,165:.:.:.:.:.	0/1:255,0,183:.:.:.:.:.	0/1:243,0,99:.:.:.:.:.	0/1:255,0,85:.:.:.:.:.	0/1:200,0,224:.:.:.:.:.	34	27	19	24	21	23	21	16	22	22	CACTIG010000023.1	22059653	22114346	NC_048332.1|27635492|27691109|-1|XM_034021927.2|XP_033877818.1|NADH:ubiquinone_oxidoreductase_subunit_A10|55618	13701
CACTIG010000023.1	22128049	.	G	C	228.192	SNP	AC=20;AD=11,10;ADF=5,5;ADR=6,5;AN=30;BQBZ=-0.688652;DP=359;DP4=45,36,100,169;FS=0;MQ=53;MQ0F=0;MQBZ=-0.852598;MQSBZ=1.42638;RPBZ=0.165198;SCBZ=0.408248;SGB=-0.692717;VDB=0.2968;SNP;TV	1/1:255,69,0:23:0:0,8:0,15:0,23	1/1:255,69,0:23:0:0,8:0,15:0,23	1/1:255,48,0:16:0:0,7:0,9:0,16	1/1:255,63,0:21:0:0,6:0,15:0,21	1/1:255,26,0:21:0:1,5:0,15:1,20	0/1:255,0,134:.:.:.:.:.	0/1:255,0,183:.:.:.:.:.	0/1:245,0,106:.:.:.:.:.	0/1:255,0,83:.:.:.:.:.	0/1:208,0,221:.:.:.:.:.	33	27	21	25	21	23	23	16	23	22	CACTIG010000023.1	22059653	22114346	NC_048332.1|27635492|27691109|-1|XM_034021927.2|XP_033877818.1|NADH:ubiquinone_oxidoreductase_subunit_A10|55618	13703
CACTIG010000023.1	22128780	.	T	G	225.417	SNP	AC=20;AD=18,10;ADF=11,3;ADR=7,7;AN=30;BQBZ=-1.00897;DP=473;DP4=63,38,192,162;FS=0;MQ=60;MQ0F=0;RPBZ=1.32202;SGB=-0.693136;VDB=0.884556;SNP;TV	1/1:252,105,0:35:0:0,13:0,22:0,35	1/1:241,75,0:25:0:0,12:0,13:0,25	1/1:214,60,0:20:0:0,14:0,6:0,20	1/1:255,96,0:32:0:0,15:0,17:0,32	1/1:218,37,0:21:0:1,12:0,8:1,20	0/1:182,0,69:.:.:.:.:.	0/1:175,0,84:.:.:.:.:.	0/1:255,0,185:.:.:.:.:.	0/1:182,0,172:.:.:.:.:.	0/1:111,0,255:.:.:.:.:.	32	27	56	27	29	36	28	20	34	23	CACTIG010000023.1	22059653	22114346	NC_048332.1|27635492|27691109|-1|XM_034021927.2|XP_033877818.1|NADH:ubiquinone_oxidoreductase_subunit_A10|55618	14434
CACTIG010000023.1	23016498	.	A	C	225.421	SNP	AC=20;AD=9,16;ADF=3,4;ADR=6,12;AN=30;BQBZ=0.723598;DP=264;DP4=16,46,39,133;FS=0;MQ=60;MQ0F=0;RPBZ=1.27397;SCBZ=-1.05928;SGB=-0.676189;VDB=0.787178;SNP;TV	1/1:255,33,0:11:0:0,4:0,7:0,11	1/1:255,42,0:14:0:0,2:0,12:0,14	1/1:201,33,0:11:0:0,1:0,10:0,11	1/1:255,36,0:13:0:0,3:0,9:0,12	1/1:255,39,0:13:0:0,3:0,10:0,13	0/1:255,0,13:.:.:.:.:.	0/1:135,0,220:.:.:.:.:.	0/1:123,0,195:.:.:.:.:.	0/1:226,0,77:.:.:.:.:.	0/1:255,0,180:.:.:.:.:.	27	28	23	32	37	21	24	28	28	19	CACTIG010000023.1	23020770	23265271	NC_048332.1|26564793|26822053|1|XM_034017651.2|XP_033873542.2|contactin-associated_protein-like_5,_transcript_variant_X2|257261	4272
CACTIG010000023.1	24344516	.	T	C	228.14	SNP	AC=20;AD=4,12;ADF=1,7;ADR=3,5;AN=30;BQBZ=-0.0515614;DP=202;DP4=5,49,76,67;FS=0;MQ=34;MQ0F=0;MQBZ=2.36142;MQSBZ=-0.297242;RPBZ=-1.00044;SCBZ=0.498363;SGB=-0.688148;VDB=0.336237;SNP;TS	1/1:240,9,0:19:6:0,7:4,8:4,15	1/1:255,11,0:19:3:0,8:2,9:2,17	1/1:151,21,0:7:0:0,5:0,2:0,7	1/1:190,5,0:10:0:0,5:1,4:1,9	1/1:114,5,0:9:0:0,1:1,7:1,8	0/1:52,0,84:.:.:.:.:.	0/1:175,0,59:.:.:.:.:.	0/1:144,0,34:.:.:.:.:.	0/1:135,0,79:.:.:.:.:.	0/1:209,0,40:.:.:.:.:.	11	16	14	12	17	19	19	9	10	10	CACTIG010000023.1	24638999	24656021	NC_048332.1|25064741|25087238|-1|XM_034003568.2|XP_033859459.2|uncharacterized_LOC117402434|22498	294483
CACTIG010000023.1	24516870	.	ta	t	176.64	DEL	AC=20;AD=11,8;ADF=8,4;ADR=3,4;AN=30;DP=377;DP4=60,64,94,122;FS=0;IDV=16;IMF=0.615385;MQ=59;MQ0F=0;MQBZ=-1.14109;MQSBZ=-1.17954;RPBZ=0.131829;SCBZ=1.14416;SGB=-0.689466;VDB=0.834132;DEL;INDEL;TV	1/1:197,8,0:24:2:4,6:4,10:8,16	1/1:157,31,0:14:0:1,6:0,7:1,13	1/1:190,17,0:15:7:0,7:3,5:3,12	1/1:201,27,0:23:10:4,8:0,11:4,19	1/1:147,11,0:20:0:3,7:3,7:6,14	0/1:86,0,45:.:.:.:.:.	0/1:190,0,23:.:.:.:.:.	0/1:210,0,75:.:.:.:.:.	0/1:145,0,79:.:.:.:.:.	0/1:81,0,44:.:.:.:.:.	23	28	29	31	19	31	17	28	24	33	CACTIG010000023.1	24638999	24656021	NC_048332.1|25064741|25087238|-1|XM_034003568.2|XP_033859459.2|uncharacterized_LOC117402434|22498	122129
CACTIG010000023.1	25063416	.	C	T	225.421	SNP	AC=20;AD=22,6;ADF=17,2;ADR=5,4;AN=30;BQBZ=-0.627289;DP=367;DP4=66,44,68,175;FS=0;MQ=48;MQ0F=0;MQBZ=-0.763763;MQSBZ=0.991859;RPBZ=0.253546;SCBZ=0.763763;SGB=-0.686358;VDB=0.885039;SNP;TS	1/1:255,42,0:14:0:0,7:0,7:0,14	1/1:255,54,0:18:0:0,2:0,16:0,18	1/1:255,57,0:19:0:0,3:0,16:0,19	1/1:255,72,0:25:0:0,8:0,16:0,24	1/1:255,60,0:21:0:0,7:0,13:0,20	0/1:228,0,185:.:.:.:.:.	0/1:255,0,120:.:.:.:.:.	0/1:205,0,240:.:.:.:.:.	0/1:255,0,74:.:.:.:.:.	0/1:96,0,255:.:.:.:.:.	25	35	28	31	31	20	27	25	38	28	CACTIG010000023.1	24984348	25019417	NC_048332.1|24703986|24739025|1|XM_034023549.2|XP_033879440.2|Indian_hedgehog_signaling_molecule_a|35040	43999
CACTIG010000023.1	25063444	.	T	A	225.417	SNP	AC=20;AD=14,5;ADF=8,2;ADR=6,3;AN=30;BQBZ=0.12223;DP=275;DP4=53,46,62,109;FS=0;MQ=44;MQ0F=0;MQBZ=-0.57906;MQSBZ=-0.235921;RPBZ=-0.694365;SGB=-0.670168;VDB=0.170536;SNP;TV	1/1:219,30,0:10:0:0,7:0,3:0,10	1/1:213,36,0:12:0:0,1:0,11:0,12	1/1:255,42,0:14:0:0,3:0,11:0,14	1/1:255,57,0:19:0:0,8:0,11:0,19	1/1:255,42,0:14:0:0,7:0,7:0,14	0/1:154,0,191:.:.:.:.:.	0/1:255,0,143:.:.:.:.:.	0/1:159,0,255:.:.:.:.:.	0/1:247,0,78:.:.:.:.:.	0/1:110,0,255:.:.:.:.:.	18	27	26	22	21	13	19	19	26	17	CACTIG010000023.1	24984348	25019417	NC_048332.1|24703986|24739025|1|XM_034023549.2|XP_033879440.2|Indian_hedgehog_signaling_molecule_a|35040	44027
CACTIG010000023.1	25063451	.	C	A	225.417	SNP	AC=20;AD=14,5;ADF=8,2;ADR=6,3;AN=30;BQBZ=0.0649675;DP=259;DP4=49,43,60,100;FS=0;MQ=44;MQ0F=0;MQBZ=-0.444487;MQSBZ=-0.235921;RPBZ=-0.319438;SGB=-0.670168;VDB=0.170536;SNP;TV	1/1:222,30,0:10:0:0,7:0,3:0,10	1/1:197,30,0:10:0:0,1:0,9:0,10	1/1:255,39,0:13:0:0,3:0,10:0,13	1/1:255,57,0:19:0:0,8:0,11:0,19	1/1:255,30,0:10:0:0,5:0,5:0,10	0/1:146,0,153:.:.:.:.:.	0/1:255,0,102:.:.:.:.:.	0/1:171,0,255:.:.:.:.:.	0/1:239,0,78:.:.:.:.:.	0/1:92,0,255:.:.:.:.:.	17	23	25	22	21	13	19	17	24	12	CACTIG010000023.1	24984348	25019417	NC_048332.1|24703986|24739025|1|XM_034023549.2|XP_033879440.2|Indian_hedgehog_signaling_molecule_a|35040	44034
CACTIG010000023.1	26390307	.	A	C	225.417	SNP	AC=20;AD=13,8;ADF=2,1;ADR=11,7;AN=30;BQBZ=-0.498742;DP=351;DP4=23,76,58,167;FS=0;MQ=60;MQ0F=0;MQBZ=-0.469042;MQSBZ=1.12122;RPBZ=0.317675;SGB=-0.692067;VDB=0.916661;SNP;TV	1/1:255,60,0:20:0:0,5:0,15:0,20	1/1:255,72,0:24:0:0,10:0,14:0,24	1/1:255,0,5:11:0:1,6:0,4:1,10	1/1:255,57,0:19:0:0,3:0,16:0,19	1/1:255,60,0:20:0:0,6:0,14:0,20	0/1:221,0,116:.:.:.:.:.	0/1:255,0,56:.:.:.:.:.	0/1:255,0,100:.:.:.:.:.	0/1:134,0,239:.:.:.:.:.	0/1:137,0,178:.:.:.:.:.	16	26	31	31	23	23	30	15	23	23	CACTIG010000023.1	26373405	26399267	NC_048332.1|23250925|23276748|1|XM_034014161.2|XP_033870052.1|mitochondrial_chaperone_BCS1,_transcript_variant_X3|25824	0
CACTIG010000023.1	27534035	.	T	G	227.953	SNP	AC=20;AD=22,43;ADF=10,7;ADR=12,36;AN=30;BQBZ=1.10116;DP=1389;DP4=140,271,118,761;FS=0;MQ=15;MQ0F=0;MQBZ=1.18363;MQSBZ=-2.12531;RPBZ=-3.61665;SCBZ=1.98687;SGB=-0.693147;VDB=0.809682;SNP;TV	1/1:181,72,0:91:2:3,10:14,64:17,74	1/1:255,138,0:148:17:9,22:13,104:22,126	1/1:184,81,0:121:48:10,7:10,94:20,101	1/1:131,0,0:84:35:8,4:10,60:18,64	1/1:233,53,0:90:0:3,14:14,54:17,68	0/1:130,0,19:.:.:.:.:.	0/1:172,0,72:.:.:.:.:.	0/1:141,0,24:.:.:.:.:.	0/1:115,0,43:.:.:.:.:.	0/1:183,0,56:.:.:.:.:.	40	66	71	64	70	102	164	130	92	103	CACTIG010000023.1	27552531	27632269	NC_048332.1|21948967|22047208|-1|XM_034006751.2|XP_033862642.1|cytochrome_P450_27C1-like|98242	18496
CACTIG010000023.1	31981909	.	G	A	228.261	SNP	AC=20;AD=13,15;ADF=5,11;ADR=8,4;AN=30;BQBZ=-0.251221;DP=394;DP4=33,46,174,124;FS=0;MQ=54;MQ0F=0;MQBZ=2.07116;MQSBZ=0.476392;RPBZ=-1.55437;SCBZ=0.930949;SGB=-0.692914;VDB=0.92335;SNP;TS	1/1:255,75,0:25:0:0,18:0,7:0,25	1/1:255,90,0:30:0:0,18:0,12:0,30	1/1:255,50,0:29:0:1,14:0,14:1,28	1/1:255,72,0:24:0:0,13:0,11:0,24	1/1:255,63,0:21:0:0,11:0,10:0,21	0/1:255,0,70:.:.:.:.:.	0/1:255,0,91:.:.:.:.:.	0/1:255,0,178:.:.:.:.:.	0/1:255,0,117:.:.:.:.:.	0/1:238,0,235:.:.:.:.:.	28	24	28	25	30	27	34	30	27	24	CACTIG010000023.1	31929456	32069436	NC_048332.1|17618144|17762102|-1|XM_034001689.2|XP_033857580.2|collagen_alpha-1(XXIV)_chain-like|143959	0
CACTIG010000023.1	32875600	.	A	G	225.417	SNP	AC=20;AD=6,23;ADF=3,10;ADR=3,13;AN=30;BQBZ=0.0753389;DP=411;DP4=36,36,156,167;FS=0;MQ=60;MQ0F=0;RPBZ=0.70066;SCBZ=0.57735;SGB=-0.693021;VDB=0.267929;SNP;TS	1/1:255,81,0:27:0:0,13:0,14:0,27	1/1:255,90,0:30:0:0,13:0,17:0,30	1/1:255,54,0:18:0:0,6:0,12:0,18	1/1:255,102,0:34:0:0,16:0,18:0,34	1/1:255,84,0:28:0:0,16:0,12:0,28	0/1:255,0,124:.:.:.:.:.	0/1:255,0,77:.:.:.:.:.	0/1:255,0,151:.:.:.:.:.	0/1:255,0,230:.:.:.:.:.	0/1:255,0,97:.:.:.:.:.	23	20	38	26	32	27	33	19	36	28	CACTIG010000023.1	32677809	32746946	NC_048332.1|16926462|16997363|-1|XM_034001991.2|XP_033857882.2|tubulin_polyglutamylase_TTLL7-like,_transcript_variant_X2|70902	128654
CACTIG010000023.1	33022009	.	A	C,T	225.417	SNP	AC=20,2;AD=8,12,7;ADF=5,7,3;ADR=3,5,4;AN=30;BQBZ=1.29355;DP=303;DP4=40,20,122,112;FS=0;MQ=60;MQ0F=0;RPBZ=1.63836;SGB=-0.692067;VDB=0.110716;SNP;TV	1/1:245,60,0,.,.,.:20:0:0,13,.:0,7,.:0,20,.	1/1:217,39,0,.,.,.:13:0:0,6,.:0,7,.:0,13,.	1/1:255,75,0,.,.,.:25:0:0,15,.:0,10,.:0,25,.	1/1:255,57,0,.,.,.:19:0:0,7,.:0,12,.:0,19,.	1/1:214,39,0,.,.,.:13:0:0,7,.:0,6,.:0,13,.	1/2:199,77,58,148,0,137:.:.:.:.:.	0/1:182,0,154,.,.,.:.:.:.:.:.	0/1:155,0,108,.,.,.:.:.:.:.:.	0/1:194,0,97,.,.,.:.:.:.:.:.	0/1:189,0,185,.,.,.:.:.:.:.:.	18	25	19	22	22	20	15	28	19	15	CACTIG010000023.1	33143508	33247660	NC_048332.1|16420105|16524573|1|XM_034010580.2|XP_033866471.1|adhesion_G_protein-coupled_receptor_L2-like,_transcript_variant_X6|104469	121499
CACTIG010000023.1	33523957	.	C	T	225.417	SNP	AC=20;AD=4,22;ADF=2,11;ADR=2,11;AN=30;BQBZ=-2.05328;DP=407;DP4=32,38,168,150;FS=0;MQ=60;MQ0F=0;MQBZ=-0.690066;MQSBZ=-0.919866;RPBZ=0.479864;SGB=-0.693021;VDB=0.855172;SNP;TS	1/1:255,81,0:27:0:0,15:0,12:0,27	1/1:255,66,0:22:0:0,13:0,9:0,22	1/1:255,72,0:24:0:0,11:0,13:0,24	1/1:255,105,0:35:0:0,15:0,20:0,35	1/1:255,66,0:22:0:0,10:0,12:0,22	0/1:255,0,156:.:.:.:.:.	0/1:255,0,192:.:.:.:.:.	0/1:255,0,210:.:.:.:.:.	0/1:251,0,97:.:.:.:.:.	0/1:255,0,60:.:.:.:.:.	24	31	32	20	29	29	25	27	38	23	CACTIG010000023.1	33763795	33796425	NC_048332.1|15863869|15896574|-1|XM_034017825.2|XP_033873716.2|adhesion_G_protein-coupled_receptor_L4-like|32706	239838
CACTIG010000023.1	33546936	.	G	A	225.417	SNP	AC=20;AD=6,20;ADF=3,9;ADR=3,11;AN=30;BQBZ=1.62919;DP=359;DP4=30,28,153,141;FS=0;MQ=58;MQ0F=0;MQBZ=-0.547723;MQSBZ=1.47196;RPBZ=0.620352;SCBZ=0.650791;SGB=-0.69168;VDB=0.583638;SNP;TS	1/1:255,57,0:19:0:0,6:0,13:0,19	1/1:255,93,0:31:0:0,15:0,16:0,31	1/1:255,57,0:19:0:0,11:0,8:0,19	1/1:255,72,0:24:0:0,10:0,14:0,24	1/1:255,63,0:21:0:0,11:0,10:0,21	0/1:255,0,36:.:.:.:.:.	0/1:255,0,43:.:.:.:.:.	0/1:255,0,205:.:.:.:.:.	0/1:255,0,114:.:.:.:.:.	0/1:255,0,109:.:.:.:.:.	25	19	26	26	28	19	32	20	24	24	CACTIG010000023.1	33763795	33796425	NC_048332.1|15863869|15896574|-1|XM_034017825.2|XP_033873716.2|adhesion_G_protein-coupled_receptor_L4-like|32706	216859
CACTIG010000023.1	33547048	.	T	G	225.417	SNP	AC=20;AD=10,23;ADF=8,15;ADR=2,8;AN=30;BQBZ=1.33628;DP=415;DP4=46,28,175,144;FS=0;MQ=60;MQ0F=0;RPBZ=0.25471;SGB=-0.692914;VDB=0.957296;SNP;TV	1/1:255,75,0:25:0:0,15:0,10:0,25	1/1:255,57,0:19:0:0,7:0,12:0,19	1/1:255,60,0:20:0:0,11:0,9:0,20	1/1:255,78,0:26:0:0,16:0,10:0,26	1/1:255,87,0:29:0:0,20:0,9:0,29	0/1:255,0,107:.:.:.:.:.	0/1:255,0,86:.:.:.:.:.	0/1:255,0,145:.:.:.:.:.	0/1:255,0,165:.:.:.:.:.	0/1:255,0,159:.:.:.:.:.	27	28	27	34	36	27	20	22	30	31	CACTIG010000023.1	33763795	33796425	NC_048332.1|15863869|15896574|-1|XM_034017825.2|XP_033873716.2|adhesion_G_protein-coupled_receptor_L4-like|32706	216747
CACTIG010000023.1	33552700	.	A	G	225.417	SNP	AC=20;AD=7,31;ADF=3,18;ADR=4,13;AN=30;BQBZ=-0.989637;DP=396;DP4=32,36,154,157;FS=0;MQ=60;MQ0F=0;RPBZ=-0.326599;SCBZ=-0.948683;SGB=-0.692831;VDB=0.375436;SNP;TS	1/1:255,72,0:24:0:0,13:0,11:0,24	1/1:255,63,0:21:0:0,8:0,13:0,21	1/1:255,99,0:33:0:0,14:0,19:0,33	1/1:255,78,0:26:0:0,13:0,13:0,26	1/1:255,93,0:31:0:0,12:0,19:0,31	0/1:187,0,215:.:.:.:.:.	0/1:231,0,134:.:.:.:.:.	0/1:255,0,73:.:.:.:.:.	0/1:255,0,121:.:.:.:.:.	0/1:255,0,106:.:.:.:.:.	19	21	22	29	38	25	23	36	28	34	CACTIG010000023.1	33763795	33796425	NC_048332.1|15863869|15896574|-1|XM_034017825.2|XP_033873716.2|adhesion_G_protein-coupled_receptor_L4-like|32706	211095
CACTIG010000023.1	34854118	.	A	T	228.281	SNP	AC=20;AD=6,9;ADF=4,7;ADR=2,2;AN=30;BQBZ=2.20756;DP=353;DP4=37,29,127,120;FS=0;MQ=60;MQ0F=0;MQBZ=2.82843;MQSBZ=-1.54919;RPBZ=-0.773082;SCBZ=-1.25381;SGB=-0.692352;VDB=0.154594;SNP;TV	1/1:255,63,0:21:0:0,13:0,8:0,21	1/1:255,57,0:19:0:0,9:0,10:0,19	1/1:255,51,0:17:0:0,12:0,5:0,17	1/1:255,31,0:18:0:1,8:1,8:2,16	1/1:255,72,0:24:0:0,15:0,9:0,24	0/1:221,0,89:.:.:.:.:.	0/1:255,0,106:.:.:.:.:.	0/1:255,0,174:.:.:.:.:.	0/1:231,0,117:.:.:.:.:.	0/1:177,0,145:.:.:.:.:.	18	32	38	20	15	23	21	19	26	26	CACTIG010000023.1	34865490	34943556	NC_048332.1|14639831|14714696|-1|XM_033999898.2|XP_033855789.2|formin-binding_protein_1-like,_transcript_variant_X2|74866	11372
CACTIG010000023.1	35214339	.	A	G	225.417	SNP	AC=20;AD=5,22;ADF=2,8;ADR=3,14;AN=30;BQBZ=0.403063;DP=338;DP4=14,34,125,154;FS=0;MQ=60;MQ0F=0;MQBZ=-0.534522;MQSBZ=0.942809;RPBZ=0.31721;SGB=-0.693127;VDB=0.147278;SNP;TS	1/1:255,99,0:33:0:0,18:0,15:0,33	1/1:255,69,0:23:0:0,11:0,12:0,23	1/1:255,54,0:18:0:0,6:0,12:0,18	1/1:255,102,0:34:0:0,18:0,16:0,34	1/1:255,69,0:23:0:0,10:0,13:0,23	0/1:244,0,132:.:.:.:.:.	0/1:255,0,124:.:.:.:.:.	0/1:162,0,84:.:.:.:.:.	0/1:255,0,74:.:.:.:.:.	0/1:255,0,83:.:.:.:.:.	22	20	12	22	28	33	23	18	34	25	CACTIG010000023.1	35214774	35223497	NC_048332.1|14361617|14370388|1|XM_034001210.2|XP_033857101.2|vascular_cell_adhesion_molecule_1b|8772	435
CACTIG010000023.1	35214346	.	C	A	225.417	SNP	AC=20;AD=5,22;ADF=2,9;ADR=3,13;AN=30;BQBZ=-1.28279;DP=331;DP4=18,36,125,148;FS=0;MQ=60;MQ0F=0;MQBZ=-0.597614;MQSBZ=0.970142;RPBZ=0.0373266;SGB=-0.693132;VDB=0.335306;SNP;TV	1/1:255,102,0:34:0:0,17:0,17:0,34	1/1:255,72,0:24:0:0,12:0,12:0,24	1/1:255,48,0:16:0:0,5:0,11:0,16	1/1:255,99,0:33:0:0,17:0,16:0,33	1/1:255,54,0:18:0:0,8:0,10:0,18	0/1:254,0,131:.:.:.:.:.	0/1:246,0,118:.:.:.:.:.	0/1:153,0,86:.:.:.:.:.	0/1:255,0,119:.:.:.:.:.	0/1:255,0,85:.:.:.:.:.	22	20	11	24	27	34	24	16	33	19	CACTIG010000023.1	35214774	35223497	NC_048332.1|14361617|14370388|1|XM_034001210.2|XP_033857101.2|vascular_cell_adhesion_molecule_1b|8772	428
CACTIG010000023.1	35214350	.	T	A	225.417	SNP	AC=20;AD=6,25;ADF=3,11;ADR=3,14;AN=30;BQBZ=0.299469;DP=351;DP4=24,38,133,148;FS=0;MQ=60;MQ0F=0;MQSBZ=0.971825;RPBZ=-0.211592;SCBZ=0.57735;SGB=-0.693132;VDB=0.355891;SNP;TV	1/1:255,102,0:34:0:0,17:0,17:0,34	1/1:255,75,0:25:0:0,13:0,12:0,25	1/1:255,48,0:16:0:0,5:0,11:0,16	1/1:255,105,0:35:0:0,18:0,17:0,35	1/1:255,51,0:17:0:0,8:0,9:0,17	0/1:255,0,128:.:.:.:.:.	0/1:236,0,132:.:.:.:.:.	0/1:119,0,159:.:.:.:.:.	0/1:255,0,96:.:.:.:.:.	0/1:255,0,83:.:.:.:.:.	25	20	13	24	31	34	25	16	35	18	CACTIG010000023.1	35214774	35223497	NC_048332.1|14361617|14370388|1|XM_034001210.2|XP_033857101.2|vascular_cell_adhesion_molecule_1b|8772	424
CACTIG010000023.1	35214416	.	A	G	225.417	SNP	AC=20;AD=8,23;ADF=7,15;ADR=1,8;AN=30;BQBZ=-1.31988;DP=359;DP4=38,16,160,127;FS=0;MQ=59;MQ0F=0;MQBZ=-0.701646;MQSBZ=0.921954;RPBZ=-0.941015;SCBZ=1.0457;SGB=-0.693141;VDB=0.154637;SNP;TS	1/1:255,111,0:37:0:0,20:0,17:0,37	1/1:255,69,0:23:0:0,12:0,11:0,23	1/1:255,54,0:18:0:0,10:0,8:0,18	1/1:255,72,0:24:0:0,13:0,11:0,24	1/1:255,57,0:19:0:0,13:0,6:0,19	0/1:255,0,94:.:.:.:.:.	0/1:249,0,60:.:.:.:.:.	0/1:254,0,102:.:.:.:.:.	0/1:255,0,168:.:.:.:.:.	0/1:255,0,122:.:.:.:.:.	26	16	21	24	33	39	25	19	28	20	CACTIG010000023.1	35214774	35223497	NC_048332.1|14361617|14370388|1|XM_034001210.2|XP_033857101.2|vascular_cell_adhesion_molecule_1b|8772	358
CACTIG010000023.1	35214442	.	C	A	225.417	SNP	AC=20;AD=7,12;ADF=7,10;ADR=0,2;AN=30;BQBZ=-0.256771;DP=313;DP4=32,16,141,112;FS=0;MQ=59;MQ0F=0;MQBZ=-0.552052;MQSBZ=0.930949;RPBZ=0.179358;SCBZ=0.882507;SGB=-0.693054;VDB=0.00924595;SNP;TV	1/1:255,84,0:28:0:0,15:0,13:0,28	1/1:255,51,0:17:0:0,8:0,9:0,17	1/1:255,48,0:16:0:0,9:0,7:0,16	1/1:255,72,0:24:0:0,11:0,13:0,24	1/1:255,54,0:18:0:0,8:0,10:0,18	0/1:255,0,97:.:.:.:.:.	0/1:255,0,18:.:.:.:.:.	0/1:255,0,153:.:.:.:.:.	0/1:255,0,51:.:.:.:.:.	0/1:207,0,116:.:.:.:.:.	23	16	23	23	20	32	20	16	25	19	CACTIG010000023.1	35214774	35223497	NC_048332.1|14361617|14370388|1|XM_034001210.2|XP_033857101.2|vascular_cell_adhesion_molecule_1b|8772	332
CACTIG010000023.1	35214443	.	A	T	228.282	SNP	AC=20;AD=9,12;ADF=7,10;ADR=2,2;AN=30;BQBZ=-0.13392;DP=324;DP4=33,27,141,112;FS=0;MQ=59;MQ0F=0;MQBZ=-0.188982;MQSBZ=0.966092;RPBZ=-1.67414;SCBZ=0.557377;SGB=-0.693054;VDB=0.00892764;SNP;TV	1/1:255,50,0:29:0:0,15:1,13:1,28	1/1:255,51,0:17:0:0,8:0,9:0,17	1/1:255,15,0:17:0:1,9:0,7:1,16	1/1:255,72,0:24:0:0,11:0,13:0,24	1/1:255,54,0:18:0:0,8:0,10:0,18	0/1:255,0,123:.:.:.:.:.	0/1:255,0,44:.:.:.:.:.	0/1:254,0,156:.:.:.:.:.	0/1:255,0,90:.:.:.:.:.	0/1:205,0,174:.:.:.:.:.	23	16	23	23	20	32	20	16	25	19	CACTIG010000023.1	35214774	35223497	NC_048332.1|14361617|14370388|1|XM_034001210.2|XP_033857101.2|vascular_cell_adhesion_molecule_1b|8772	331
CACTIG010000023.1	35214447	.	T	C	228.32	SNP	AC=20;AD=8,12;ADF=7,10;ADR=1,2;AN=30;BQBZ=2.49539;DP=333;DP4=33,22,141,113;FS=0;MQ=59;MQ0F=0;MQBZ=-0.267261;MQSBZ=1;RPBZ=2.32925;SCBZ=0.785109;SGB=-0.693054;VDB=0.00802956;SNP;TS	1/1:255,61,0:30:3:0,15:2,13:2,28	1/1:255,54,0:18:0:0,8:0,10:0,18	1/1:255,17,0:17:0:1,9:0,7:1,16	1/1:255,72,0:24:0:0,11:0,13:0,24	1/1:255,54,0:18:0:0,8:0,10:0,18	0/1:255,0,112:.:.:.:.:.	0/1:255,0,22:.:.:.:.:.	0/1:255,0,156:.:.:.:.:.	0/1:255,0,55:.:.:.:.:.	0/1:204,0,129:.:.:.:.:.	26	16	24	22	23	35	21	18	27	19	CACTIG010000023.1	35214774	35223497	NC_048332.1|14361617|14370388|1|XM_034001210.2|XP_033857101.2|vascular_cell_adhesion_molecule_1b|8772	327
CACTIG010000023.1	35214646	.	C	T	225.421	SNP	AC=20;AD=5,25;ADF=2,16;ADR=3,9;AN=30;BQBZ=0.558212;DP=394;DP4=56,22,168,137;FS=0;MQ=60;MQ0F=0;MQBZ=1.49071;MQSBZ=-0.966092;RPBZ=0.0976568;SCBZ=1.32322;SGB=-0.693021;VDB=0.348261;SNP;TS	1/1:255,81,0:27:0:0,17:0,10:0,27	1/1:255,57,0:20:0:0,11:0,8:0,19	1/1:255,69,0:23:0:0,9:0,14:0,23	1/1:255,78,0:26:0:0,15:0,11:0,26	1/1:255,45,0:15:0:0,8:0,7:0,15	0/1:255,0,68:.:.:.:.:.	0/1:252,0,50:.:.:.:.:.	0/1:240,0,232:.:.:.:.:.	0/1:255,0,172:.:.:.:.:.	0/1:255,0,65:.:.:.:.:.	27	24	33	29	30	30	21	24	27	17	CACTIG010000023.1	35214774	35223497	NC_048332.1|14361617|14370388|1|XM_034001210.2|XP_033857101.2|vascular_cell_adhesion_molecule_1b|8772	128
CACTIG010000023.1	35214848	.	TAACTTTAAAG	T	225.417	DEL	AC=20;AD=8,20;ADF=4,10;ADR=4,10;AN=30;DP=369;DP4=54,58,113,99;FS=0;IDV=13;IMF=0.722222;MQ=60;MQ0F=0;RPBZ=-3.23891;SCBZ=-4.05438;SGB=-0.683931;VDB=0.0726149;DEL;INDEL;TV	1/1:255,39,0:13:0:0,4:0,9:0,13	1/1:255,45,0:15:0:0,9:0,6:0,15	1/1:255,45,0:15:0:0,7:0,8:0,15	1/1:255,60,0:20:0:0,13:0,7:0,20	1/1:255,45,0:15:0:0,8:0,7:0,15	0/1:255,0,157:.:.:.:.:.	0/1:255,0,145:.:.:.:.:.	0/1:215,0,255:.:.:.:.:.	0/1:239,0,202:.:.:.:.:.	0/1:255,0,134:.:.:.:.:.	23	22	38	23	32	18	18	22	24	20	CACTIG010000023.1	35214774	35223497	NC_048332.1|14361617|14370388|1|XM_034001210.2|XP_033857101.2|vascular_cell_adhesion_molecule_1b|8772	0
CACTIG010000023.1	35214863	.	A	G	148.416	SNP	AC=20;AD=6,22;ADF=3,10;ADR=3,12;AN=30;BQBZ=-3.23445;DP=356;DP4=56,52,118,114;FS=0;MQ=60;MQ0F=0;RPBZ=-0.0683102;SGB=-0.683931;VDB=0.0726149;SNP;TS	1/1:163,39,0:13:0:0,4:0,9:0,13	1/1:168,45,0:15:0:0,9:0,6:0,15	1/1:178,48,0:16:0:0,8:0,8:0,16	1/1:169,57,0:19:0:0,12:0,7:0,19	1/1:147,39,0:13:0:0,7:0,6:0,13	0/1:130,0,163:.:.:.:.:.	0/1:100,0,57:.:.:.:.:.	0/1:145,0,255:.:.:.:.:.	0/1:144,0,229:.:.:.:.:.	0/1:136,0,101:.:.:.:.:.	24	21	41	27	28	13	17	16	23	14	CACTIG010000023.1	35214774	35223497	NC_048332.1|14361617|14370388|1|XM_034001210.2|XP_033857101.2|vascular_cell_adhesion_molecule_1b|8772	0
CACTIG010000023.1	35214896	.	G	T	225.417	SNP	AC=20;AD=9,20;ADF=1,6;ADR=8,14;AN=30;BQBZ=1.45491;DP=412;DP4=46,56,123,162;FS=0;MQ=60;MQ0F=0;RPBZ=-0.478714;SCBZ=0.755929;SGB=-0.69168;VDB=0.928844;SNP;TV	1/1:255,57,0:19:0:0,5:0,14:0,19	1/1:255,69,0:23:0:0,12:0,11:0,23	1/1:255,54,0:18:0:0,9:0,9:0,18	1/1:255,54,0:18:0:0,8:0,10:0,18	1/1:255,51,0:17:0:0,7:0,10:0,17	0/1:255,0,158:.:.:.:.:.	0/1:255,0,47:.:.:.:.:.	0/1:255,0,255:.:.:.:.:.	0/1:255,0,187:.:.:.:.:.	0/1:255,0,178:.:.:.:.:.	24	27	43	33	35	21	23	18	21	17	CACTIG010000023.1	35214774	35223497	NC_048332.1|14361617|14370388|1|XM_034001210.2|XP_033857101.2|vascular_cell_adhesion_molecule_1b|8772	0
CACTIG010000023.1	35214990	.	C	A	225.421	SNP	AC=20;AD=8,27;ADF=6,14;ADR=2,13;AN=30;BQBZ=0.0590481;DP=410;DP4=52,58,149,134;FS=0;MQ=60;MQ0F=0;RPBZ=-1.19408;SGB=-0.692562;VDB=0.55876;SNP;TV	1/1:255,66,0:22:0:0,19:0,3:0,22	1/1:255,60,0:20:0:0,9:0,11:0,20	1/1:255,60,0:21:0:0,9:0,11:0,20	1/1:255,66,0:22:0:0,12:0,10:0,22	1/1:255,54,0:18:0:0,12:0,6:0,18	0/1:255,0,134:.:.:.:.:.	0/1:255,0,187:.:.:.:.:.	0/1:212,0,255:.:.:.:.:.	0/1:212,0,236:.:.:.:.:.	0/1:255,0,126:.:.:.:.:.	30	28	30	26	39	23	22	21	23	22	CACTIG010000023.1	35214774	35223497	NC_048332.1|14361617|14370388|1|XM_034001210.2|XP_033857101.2|vascular_cell_adhesion_molecule_1b|8772	0
CACTIG010000023.1	35215001	.	A	C	228.39	SNP	AC=20;AD=7,23;ADF=6,14;ADR=1,9;AN=30;BQBZ=2.03235;DP=396;DP4=45,60,149,124;FS=0;MQ=60;MQ0F=0;RPBZ=0.260231;SGB=-0.692562;VDB=0.484002;SNP;TV	1/1:255,63,0:22:0:0,16:0,5:0,21	1/1:255,54,0:18:0:0,7:0,11:0,18	1/1:255,69,0:23:0:0,12:0,11:0,23	1/1:255,47,0:20:0:1,11:0,8:1,19	1/1:255,51,0:17:0:0,10:0,7:0,17	0/1:255,0,131:.:.:.:.:.	0/1:255,0,188:.:.:.:.:.	0/1:199,0,255:.:.:.:.:.	0/1:213,0,249:.:.:.:.:.	0/1:255,0,105:.:.:.:.:.	32	32	24	26	33	25	20	23	21	20	CACTIG010000023.1	35214774	35223497	NC_048332.1|14361617|14370388|1|XM_034001210.2|XP_033857101.2|vascular_cell_adhesion_molecule_1b|8772	0
CACTIG010000023.1	35215182	.	C	A	225.417	SNP	AC=20;AD=7,22;ADF=0,13;ADR=7,9;AN=30;BQBZ=0.861892;DP=398;DP4=40,40,160,150;FS=0;MQ=60;MQ0F=0;RPBZ=-0.963617;SCBZ=1.24316;SGB=-0.693021;VDB=0.900631;SNP;TV	1/1:255,81,0:27:0:0,17:0,10:0,27	1/1:255,51,0:17:0:0,6:0,11:0,17	1/1:255,66,0:22:0:0,10:0,12:0,22	1/1:255,99,0:33:0:0,20:0,13:0,33	1/1:255,75,0:25:0:0,15:0,10:0,25	0/1:255,0,82:.:.:.:.:.	0/1:255,0,116:.:.:.:.:.	0/1:206,0,255:.:.:.:.:.	0/1:255,0,90:.:.:.:.:.	0/1:255,0,94:.:.:.:.:.	19	29	32	34	29	30	19	24	34	25	CACTIG010000023.1	35214774	35223497	NC_048332.1|14361617|14370388|1|XM_034001210.2|XP_033857101.2|vascular_cell_adhesion_molecule_1b|8772	0
CACTIG010000023.1	35215219	.	C	T	225.417	SNP	AC=20;AD=5,20;ADF=1,12;ADR=4,8;AN=30;BQBZ=1.06787;DP=353;DP4=28,44,145,126;FS=0;MQ=60;MQ0F=0;RPBZ=-0.94313;SCBZ=0.480384;SGB=-0.692914;VDB=0.621856;SNP;TS	1/1:255,75,0:25:0:0,16:0,9:0,25	1/1:255,36,0:12:0:0,6:0,6:0,12	1/1:255,51,0:17:0:0,8:0,9:0,17	1/1:255,69,0:23:0:0,15:0,8:0,23	1/1:255,60,0:20:0:0,12:0,8:0,20	0/1:255,0,53:.:.:.:.:.	0/1:255,0,103:.:.:.:.:.	0/1:160,0,255:.:.:.:.:.	0/1:255,0,110:.:.:.:.:.	0/1:255,0,80:.:.:.:.:.	16	28	26	34	26	29	12	18	26	23	CACTIG010000023.1	35214774	35223497	NC_048332.1|14361617|14370388|1|XM_034001210.2|XP_033857101.2|vascular_cell_adhesion_molecule_1b|8772	0
CACTIG010000023.1	35215299	.	A	G	225.417	SNP	AC=20;AD=5,28;ADF=5,13;ADR=0,15;AN=30;BQBZ=1.40495;DP=386;DP4=34,34,146,154;FS=0;MQ=60;MQ0F=0;RPBZ=0.453189;SCBZ=1.2225;SGB=-0.693021;VDB=0.432401;SNP;TS	1/1:255,81,0:27:0:0,10:0,17:0,27	1/1:255,45,0:15:0:0,9:0,6:0,15	1/1:255,54,0:18:0:0,6:0,12:0,18	1/1:255,105,0:35:0:0,14:0,21:0,35	1/1:255,69,0:23:0:0,7:0,16:0,23	0/1:244,0,77:.:.:.:.:.	0/1:255,0,58:.:.:.:.:.	0/1:214,0,255:.:.:.:.:.	0/1:255,0,189:.:.:.:.:.	0/1:255,0,38:.:.:.:.:.	19	27	25	31	34	29	19	18	38	27	CACTIG010000023.1	35214774	35223497	NC_048332.1|14361617|14370388|1|XM_034001210.2|XP_033857101.2|vascular_cell_adhesion_molecule_1b|8772	0
CACTIG010000023.1	35215315	.	A	C	225.417	SNP	AC=20;AD=4,25;ADF=4,12;ADR=0,13;AN=30;BQBZ=-0.390738;DP=375;DP4=28,38,138,154;FS=0;MQ=60;MQ0F=0;MQSBZ=1.5163;RPBZ=1.03078;SCBZ=1.78387;SGB=-0.692914;VDB=0.0623976;SNP;TV	1/1:255,75,0:25:0:0,9:0,16:0,25	1/1:255,48,0:16:0:0,9:0,7:0,16	1/1:255,54,0:18:0:0,6:0,12:0,18	1/1:255,108,0:36:0:0,17:0,19:0,36	1/1:255,69,0:23:0:0,7:0,16:0,23	0/1:241,0,126:.:.:.:.:.	0/1:255,0,72:.:.:.:.:.	0/1:255,0,228:.:.:.:.:.	0/1:255,0,144:.:.:.:.:.	0/1:255,0,36:.:.:.:.:.	18	24	28	29	29	28	20	18	41	28	CACTIG010000023.1	35214774	35223497	NC_048332.1|14361617|14370388|1|XM_034001210.2|XP_033857101.2|vascular_cell_adhesion_molecule_1b|8772	0
CACTIG010000023.1	35215433	.	t	tATAA	225.417	INS	AC=20;AD=5,14;ADF=1,4;ADR=4,10;AN=30;DP=258;DP4=32,34,76,85;FS=0;IDV=12;IMF=1;MQ=36;MQ0F=0;MQBZ=0.773052;MQSBZ=0.661673;RPBZ=-1.59605;SCBZ=0.807573;SGB=-0.670168;VDB=0.000368483;INDEL;INS;TV	1/1:252,30,0:10:0:0,3:0,7:0,10	1/1:231,30,0:10:0:0,5:0,5:0,10	1/1:181,21,0:7:0:0,5:0,2:0,7	1/1:231,39,0:13:0:0,9:0,4:0,13	1/1:255,36,0:12:0:0,7:0,5:0,12	0/1:197,0,132:.:.:.:.:.	0/1:234,0,90:.:.:.:.:.	0/1:54,0,255:.:.:.:.:.	0/1:145,0,97:.:.:.:.:.	0/1:255,0,90:.:.:.:.:.	14	24	17	22	21	12	13	8	18	14	CACTIG010000023.1	35214774	35223497	NC_048332.1|14361617|14370388|1|XM_034001210.2|XP_033857101.2|vascular_cell_adhesion_molecule_1b|8772	0
CACTIG010000023.1	35215452	.	A	G	228.402	SNP	AC=20;AD=4,20;ADF=1,8;ADR=3,12;AN=30;BQBZ=-1.68878;DP=310;DP4=29,29,129,115;FS=0;MQ=41;MQ0F=0;MQBZ=0.109985;MQSBZ=-1.34365;RPBZ=1.64175;SCBZ=-1.9572;SGB=-0.690438;VDB=0.143584;SNP;TS	1/1:255,14,0:18:0:0,7:1,10:1,17	1/1:255,42,0:14:0:0,8:0,6:0,14	1/1:226,30,0:11:0:0,4:0,6:0,10	1/1:255,63,0:21:0:0,14:0,7:0,21	1/1:255,53,0:22:0:1,15:0,6:1,21	0/1:244,0,52:.:.:.:.:.	0/1:255,0,93:.:.:.:.:.	0/1:79,0,255:.:.:.:.:.	0/1:231,0,75:.:.:.:.:.	0/1:255,0,62:.:.:.:.:.	20	33	21	25	31	26	17	12	26	29	CACTIG010000023.1	35214774	35223497	NC_048332.1|14361617|14370388|1|XM_034001210.2|XP_033857101.2|vascular_cell_adhesion_molecule_1b|8772	0
CACTIG010000023.1	35215466	.	T	G	228.141	SNP	AC=20;AD=4,19;ADF=1,7;ADR=3,12;AN=30;BQBZ=-1.69063;DP=345;DP4=30,29,151,126;FS=0;MQ=42;MQ0F=0;MQBZ=0.213066;MQSBZ=-1.00114;RPBZ=0.28972;SCBZ=-1.95289;SGB=-0.690438;VDB=0.18357;SNP;TV	1/1:255,14,0:18:0:0,7:1,10:1,17	1/1:255,57,0:19:0:0,11:0,8:0,19	1/1:239,36,0:12:0:0,7:0,5:0,12	1/1:255,72,0:24:0:0,16:0,8:0,24	1/1:255,75,0:25:0:0,20:0,5:0,25	0/1:255,0,15:.:.:.:.:.	0/1:255,0,124:.:.:.:.:.	0/1:140,0,231:.:.:.:.:.	0/1:255,0,86:.:.:.:.:.	0/1:255,0,58:.:.:.:.:.	22	36	24	30	31	26	22	14	30	31	CACTIG010000023.1	35214774	35223497	NC_048332.1|14361617|14370388|1|XM_034001210.2|XP_033857101.2|vascular_cell_adhesion_molecule_1b|8772	0
CACTIG010000023.1	35215476	.	G	A	228.177	SNP	AC=20;AD=4,22;ADF=1,8;ADR=3,14;AN=30;BQBZ=-1.80666;DP=375;DP4=30,29,170,123;FS=0;MQ=47;MQ0F=0;MQBZ=0.769444;MQSBZ=-2.0225;RPBZ=-0.607892;SCBZ=-2.35666;SGB=-0.69168;VDB=0.483025;SNP;TS	1/1:255,20,0:20:0:0,9:1,10:1,19	1/1:255,63,0:21:0:0,14:0,7:0,21	1/1:255,45,0:15:0:0,11:0,4:0,15	1/1:255,78,0:26:0:0,17:0,9:0,26	1/1:255,78,0:26:0:0,21:0,5:0,26	0/1:255,0,20:.:.:.:.:.	0/1:255,0,117:.:.:.:.:.	0/1:195,0,222:.:.:.:.:.	0/1:255,0,83:.:.:.:.:.	0/1:255,0,58:.:.:.:.:.	20	38	26	33	37	29	25	17	32	33	CACTIG010000023.1	35214774	35223497	NC_048332.1|14361617|14370388|1|XM_034001210.2|XP_033857101.2|vascular_cell_adhesion_molecule_1b|8772	0
CACTIG010000023.1	35215669	.	A	C	225.417	SNP	AC=20;AD=2,15;ADF=1,8;ADR=1,7;AN=30;BQBZ=0.782619;DP=355;DP4=28,24,130,163;FS=0;MQ=60;MQ0F=0;RPBZ=-1.78429;SCBZ=0.80904;SGB=-0.692914;VDB=0.866678;SNP;TV	1/1:255,75,0:25:0:0,14:0,11:0,25	1/1:255,63,0:21:0:0,6:0,15:0,21	1/1:255,87,0:29:0:0,17:0,12:0,29	1/1:255,90,0:30:0:0,15:0,15:0,30	1/1:255,66,0:22:0:0,12:0,10:0,22	0/1:255,0,50:.:.:.:.:.	0/1:213,0,18:.:.:.:.:.	0/1:125,0,255:.:.:.:.:.	0/1:255,0,64:.:.:.:.:.	0/1:255,0,25:.:.:.:.:.	26	17	22	31	18	27	21	33	31	25	CACTIG010000023.1	35214774	35223497	NC_048332.1|14361617|14370388|1|XM_034001210.2|XP_033857101.2|vascular_cell_adhesion_molecule_1b|8772	0
CACTIG010000023.1	35215718	.	T	TAGTTAAC	225.417	INS	AC=20;AD=6,13;ADF=4,6;ADR=2,7;AN=30;DP=310;DP4=28,24,97,95;FS=0;IDV=20;IMF=0.769231;MQ=60;MQ0F=0;MQBZ=-1.19523;MQSBZ=0.83666;RPBZ=-3.67607;SCBZ=-4.16797;SGB=-0.692067;VDB=0.0158437;INDEL;INS;TV	1/1:255,60,0:20:0:0,8:0,12:0,20	1/1:255,48,0:16:0:0,7:0,9:0,16	1/1:255,63,0:21:0:0,11:0,10:0,21	1/1:255,54,0:18:0:0,10:0,8:0,18	1/1:255,57,0:19:0:0,11:0,8:0,19	0/1:255,0,90:.:.:.:.:.	0/1:255,0,93:.:.:.:.:.	0/1:255,0,255:.:.:.:.:.	0/1:255,0,150:.:.:.:.:.	0/1:255,0,117:.:.:.:.:.	15	13	17	25	21	26	22	26	29	26	CACTIG010000023.1	35214774	35223497	NC_048332.1|14361617|14370388|1|XM_034001210.2|XP_033857101.2|vascular_cell_adhesion_molecule_1b|8772	0
CACTIG010000023.1	35215781	.	C	T	225.417	SNP	AC=20;AD=8,22;ADF=6,12;ADR=2,10;AN=30;BQBZ=-0.272763;DP=350;DP4=46,28,117,141;FS=0;MQ=60;MQ0F=0;RPBZ=0.901999;SCBZ=1.5042;SGB=-0.69168;VDB=0.826085;SNP;TS	1/1:255,57,0:19:0:0,6:0,13:0,19	1/1:255,60,0:20:0:0,10:0,10:0,20	1/1:255,105,0:35:0:0,15:0,20:0,35	1/1:255,57,0:19:0:0,5:0,14:0,19	1/1:255,69,0:23:0:0,9:0,14:0,23	0/1:255,0,107:.:.:.:.:.	0/1:122,0,135:.:.:.:.:.	0/1:212,0,223:.:.:.:.:.	0/1:255,0,129:.:.:.:.:.	0/1:255,0,140:.:.:.:.:.	27	12	22	23	33	19	20	38	20	23	CACTIG010000023.1	35214774	35223497	NC_048332.1|14361617|14370388|1|XM_034001210.2|XP_033857101.2|vascular_cell_adhesion_molecule_1b|8772	0
CACTIG010000023.1	35215797	.	A	T	225.417	SNP	AC=20;AD=8,19;ADF=5,13;ADR=3,6;AN=30;BQBZ=-0.439916;DP=347;DP4=48,24,128,120;FS=0;MQ=60;MQ0F=0;RPBZ=0.630669;SCBZ=1.06269;SGB=-0.689466;VDB=0.135499;SNP;TV	1/1:255,48,0:16:0:0,8:0,8:0,16	1/1:255,60,0:20:0:0,11:0,9:0,20	1/1:255,84,0:28:0:0,13:0,15:0,28	1/1:255,63,0:21:0:0,8:0,13:0,21	1/1:255,63,0:21:0:0,8:0,13:0,21	0/1:255,0,79:.:.:.:.:.	0/1:108,0,108:.:.:.:.:.	0/1:225,0,218:.:.:.:.:.	0/1:255,0,149:.:.:.:.:.	0/1:255,0,201:.:.:.:.:.	29	9	22	26	32	19	20	32	21	23	CACTIG010000023.1	35214774	35223497	NC_048332.1|14361617|14370388|1|XM_034001210.2|XP_033857101.2|vascular_cell_adhesion_molecule_1b|8772	0
CACTIG010000023.1	35215936	.	A	C	225.417	SNP	AC=20;AD=5,21;ADF=3,10;ADR=2,11;AN=30;BQBZ=-0.711246;DP=391;DP4=32,48,158,141;FS=0;MQ=60;MQ0F=0;RPBZ=-0.78899;SGB=-0.693079;VDB=0.287503;SNP;TV	1/1:255,87,0:29:0:0,18:0,11:0,29	1/1:255,57,0:19:0:0,11:0,8:0,19	1/1:255,102,0:34:0:0,18:0,16:0,34	1/1:255,63,0:21:0:0,10:0,11:0,21	1/1:255,60,0:20:0:0,13:0,7:0,20	0/1:248,0,121:.:.:.:.:.	0/1:255,0,138:.:.:.:.:.	0/1:255,0,252:.:.:.:.:.	0/1:255,0,102:.:.:.:.:.	0/1:255,0,86:.:.:.:.:.	20	24	33	27	28	29	20	37	23	23	CACTIG010000023.1	35214774	35223497	NC_048332.1|14361617|14370388|1|XM_034001210.2|XP_033857101.2|vascular_cell_adhesion_molecule_1b|8772	0
CACTIG010000023.1	35215965	.	T	A	225.421	SNP	AC=20;AD=7,22;ADF=5,14;ADR=2,8;AN=30;BQBZ=0.369661;DP=425;DP4=36,44,180,150;FS=0;MQ=60;MQ0F=0;RPBZ=-0.334242;SGB=-0.69311;VDB=0.487498;SNP;TV	1/1:255,93,0:31:0:0,18:0,13:0,31	1/1:255,54,0:19:0:0,11:0,7:0,18	1/1:255,102,0:34:0:0,18:0,16:0,34	1/1:255,78,0:26:0:0,12:0,14:0,26	1/1:255,84,0:28:0:0,14:0,14:0,28	0/1:255,0,138:.:.:.:.:.	0/1:255,0,93:.:.:.:.:.	0/1:250,0,255:.:.:.:.:.	0/1:255,0,55:.:.:.:.:.	0/1:255,0,109:.:.:.:.:.	23	24	32	30	32	31	20	37	27	31	CACTIG010000023.1	35214774	35223497	NC_048332.1|14361617|14370388|1|XM_034001210.2|XP_033857101.2|vascular_cell_adhesion_molecule_1b|8772	0
CACTIG010000023.1	35215975	.	G	C	225.421	SNP	AC=20;AD=8,23;ADF=6,15;ADR=2,8;AN=30;BQBZ=2.23566;DP=444;DP4=46,48,181,156;FS=0;MQ=60;MQ0F=0;RPBZ=-0.361296;SGB=-0.693054;VDB=0.44984;SNP;TV	1/1:255,81,0:28:0:0,15:0,12:0,27	1/1:255,60,0:20:0:0,11:0,9:0,20	1/1:255,96,0:32:0:0,18:0,14:0,32	1/1:255,78,0:26:0:0,12:0,14:0,26	1/1:255,87,0:29:0:0,15:0,14:0,29	0/1:255,0,171:.:.:.:.:.	0/1:255,0,90:.:.:.:.:.	0/1:244,0,255:.:.:.:.:.	0/1:255,0,134:.:.:.:.:.	0/1:255,0,133:.:.:.:.:.	28	26	32	33	34	29	22	32	26	33	CACTIG010000023.1	35214774	35223497	NC_048332.1|14361617|14370388|1|XM_034001210.2|XP_033857101.2|vascular_cell_adhesion_molecule_1b|8772	0
CACTIG010000023.1	35216305	.	G	C	225.417	SNP	AC=20;AD=10,25;ADF=7,14;ADR=3,11;AN=30;BQBZ=-1.43774;DP=415;DP4=56,50,156,150;FS=0;MQ=53;MQ0F=0;MQBZ=-1.11355;MQSBZ=-0.523454;RPBZ=-1.64284;SCBZ=1.81152;SGB=-0.692067;VDB=2.50093e-05;SNP;TV	1/1:255,60,0:20:0:0,12:0,8:0,20	1/1:255,96,0:32:0:0,18:0,14:0,32	1/1:255,51,0:17:0:0,5:0,12:0,17	1/1:255,99,0:33:0:0,17:0,16:0,33	1/1:255,54,0:18:0:0,10:0,8:0,18	0/1:255,0,125:.:.:.:.:.	0/1:255,0,94:.:.:.:.:.	0/1:126,0,255:.:.:.:.:.	0/1:255,0,148:.:.:.:.:.	0/1:255,0,160:.:.:.:.:.	32	26	29	27	36	20	32	18	34	19	CACTIG010000023.1	35214774	35223497	NC_048332.1|14361617|14370388|1|XM_034001210.2|XP_033857101.2|vascular_cell_adhesion_molecule_1b|8772	0
CACTIG010000023.1	35216400	.	T	C	225.417	SNP	AC=20;AD=3,16;ADF=1,7;ADR=2,9;AN=30;BQBZ=0;DP=481;DP4=60,30,185,193;FS=0;MQ=60;MQ0F=0;MQBZ=-0.617213;MQSBZ=-1.1094;RPBZ=-0.885874;SCBZ=0.4;SGB=-0.693136;VDB=0.368687;SNP;TS	1/1:255,105,0:35:0:0,14:0,21:0,35	1/1:255,69,0:23:0:0,11:0,12:0,23	1/1:255,90,0:30:0:0,17:0,13:0,30	1/1:255,117,0:39:0:0,24:0,15:0,39	1/1:255,87,0:29:0:0,13:0,16:0,29	0/1:255,0,60:.:.:.:.:.	0/1:255,0,113:.:.:.:.:.	0/1:255,0,255:.:.:.:.:.	0/1:255,0,148:.:.:.:.:.	0/1:255,0,48:.:.:.:.:.	31	42	43	31	21	36	25	31	40	31	CACTIG010000023.1	35214774	35223497	NC_048332.1|14361617|14370388|1|XM_034001210.2|XP_033857101.2|vascular_cell_adhesion_molecule_1b|8772	0
CACTIG010000023.1	35216544	.	A	T	228.163	SNP	AC=20;AD=9,14;ADF=6,9;ADR=3,5;AN=30;BQBZ=3.25609;DP=452;DP4=69,62,163,144;FS=0;MQ=60;MQ0F=0;RPBZ=0.679628;SCBZ=-2;SGB=-0.692562;VDB=0.468364;SNP;TV	1/1:255,66,0:22:0:0,13:0,9:0,22	1/1:255,96,0:32:0:0,22:0,10:0,32	1/1:255,24,0:25:12:5,10:0,10:5,20	1/1:255,12,0:30:2:2,11:4,13:6,24	1/1:255,75,0:25:0:0,13:0,12:0,25	0/1:255,0,138:.:.:.:.:.	0/1:255,0,163:.:.:.:.:.	0/1:255,0,255:.:.:.:.:.	0/1:255,0,161:.:.:.:.:.	0/1:255,0,88:.:.:.:.:.	24	39	41	32	25	23	34	27	34	25	CACTIG010000023.1	35214774	35223497	NC_048332.1|14361617|14370388|1|XM_034001210.2|XP_033857101.2|vascular_cell_adhesion_molecule_1b|8772	0
CACTIG010000023.1	35217541	.	T	C	227.502	SNP	AC=20;AD=9,16;ADF=4,8;ADR=5,8;AN=30;BQBZ=1.27149;DP=451;DP4=70,56,166,138;FS=0;MQ=48;MQ0F=0;MQBZ=-1.1954;MQSBZ=0.169429;RPBZ=-0.119925;SCBZ=-1.57197;SGB=-0.69168;VDB=0.809966;SNP;TS	1/1:255,57,0:19:0:0,9:0,10:0,19	1/1:255,72,0:24:0:0,10:0,14:0,24	1/1:255,0,1:21:7:2,8:0,11:2,19	1/1:255,63,0:21:0:0,9:0,12:0,21	1/1:255,72,0:25:0:0,14:0,10:0,24	0/1:255,0,220:.:.:.:.:.	0/1:255,0,202:.:.:.:.:.	0/1:255,0,255:.:.:.:.:.	0/1:255,0,108:.:.:.:.:.	0/1:249,0,184:.:.:.:.:.	25	37	49	35	25	20	27	21	24	27	CACTIG010000023.1	35214774	35223497	NC_048332.1|14361617|14370388|1|XM_034001210.2|XP_033857101.2|vascular_cell_adhesion_molecule_1b|8772	0
CACTIG010000023.1	35217547	.	A	G	228.375	SNP	AC=20;AD=3,18;ADF=2,8;ADR=1,10;AN=30;BQBZ=1.69458;DP=429;DP4=53,46,167,145;FS=0;MQ=47;MQ0F=0;MQBZ=-1.24128;MQSBZ=-0.0455849;RPBZ=-0.0642431;SCBZ=0.196116;SGB=-0.691153;VDB=0.715352;SNP;TS	1/1:255,54,0:18:0:0,9:0,9:0,18	1/1:255,72,0:24:0:0,10:0,14:0,24	1/1:255,63,0:21:0:0,8:0,13:0,21	1/1:255,69,0:23:0:0,10:0,13:0,23	1/1:255,67,0:27:0:1,16:0,10:1,26	0/1:255,0,39:.:.:.:.:.	0/1:255,0,208:.:.:.:.:.	0/1:255,0,255:.:.:.:.:.	0/1:255,0,116:.:.:.:.:.	0/1:255,0,25:.:.:.:.:.	20	37	49	32	21	18	26	21	25	29	CACTIG010000023.1	35214774	35223497	NC_048332.1|14361617|14370388|1|XM_034001210.2|XP_033857101.2|vascular_cell_adhesion_molecule_1b|8772	0
CACTIG010000023.1	35217865	.	C	A	225.417	SNP	AC=20;AD=11,19;ADF=5,7;ADR=6,12;AN=30;BQBZ=2.76736;DP=418;DP4=34,48,161,164;FS=0;MQ=60;MQ0F=0;RPBZ=0.433735;SGB=-0.692067;VDB=0.829069;SNP;TV	1/1:255,60,0:20:0:0,11:0,9:0,20	1/1:255,69,0:23:0:0,13:0,10:0,23	1/1:255,84,0:28:0:0,15:0,13:0,28	1/1:255,111,0:37:0:0,16:0,21:0,37	1/1:255,51,0:17:0:0,4:0,13:0,17	0/1:255,0,112:.:.:.:.:.	0/1:255,0,59:.:.:.:.:.	0/1:255,0,245:.:.:.:.:.	0/1:255,0,22:.:.:.:.:.	0/1:255,0,201:.:.:.:.:.	29	29	38	18	31	22	23	30	37	20	CACTIG010000023.1	35214774	35223497	NC_048332.1|14361617|14370388|1|XM_034001210.2|XP_033857101.2|vascular_cell_adhesion_molecule_1b|8772	0
CACTIG010000023.1	35217891	.	C	G	225.417	SNP	AC=20;AD=11,22;ADF=3,7;ADR=8,15;AN=30;BQBZ=0.943925;DP=411;DP4=36,50,154,156;FS=0;MQ=60;MQ0F=0;RPBZ=-0.475561;SCBZ=0.707107;SGB=-0.692352;VDB=0.887235;SNP;TV	1/1:255,63,0:21:0:0,8:0,13:0,21	1/1:255,75,0:25:0:0,11:0,14:0,25	1/1:255,81,0:27:0:0,14:0,13:0,27	1/1:255,90,0:30:0:0,15:0,15:0,30	1/1:255,57,0:19:0:0,8:0,11:0,19	0/1:255,0,155:.:.:.:.:.	0/1:255,0,26:.:.:.:.:.	0/1:255,0,255:.:.:.:.:.	0/1:255,0,29:.:.:.:.:.	0/1:255,0,177:.:.:.:.:.	30	23	42	17	35	21	25	27	31	21	CACTIG010000023.1	35214774	35223497	NC_048332.1|14361617|14370388|1|XM_034001210.2|XP_033857101.2|vascular_cell_adhesion_molecule_1b|8772	0
CACTIG010000023.1	35218357	.	A	G	225.417	SNP	AC=20;AD=12,33;ADF=8,22;ADR=4,11;AN=30;BQBZ=-0.122026;DP=529;DP4=62,56,211,185;FS=0;MQ=59;MQ0F=0;MQBZ=-0.417029;MQSBZ=-1.39728;RPBZ=-1.50247;SCBZ=1.02598;SGB=-0.693145;VDB=0.88064;SNP;TS	1/1:255,123,0:41:0:0,20:0,21:0,41	1/1:255,60,0:20:0:0,12:0,8:0,20	1/1:255,75,0:25:0:0,11:0,14:0,25	1/1:255,108,0:36:0:0,14:0,22:0,36	1/1:255,84,0:28:0:0,14:0,14:0,28	0/1:255,0,39:.:.:.:.:.	0/1:255,0,129:.:.:.:.:.	0/1:255,0,255:.:.:.:.:.	0/1:255,0,229:.:.:.:.:.	0/1:255,0,175:.:.:.:.:.	28	34	39	40	46	47	21	25	38	30	CACTIG010000023.1	35214774	35223497	NC_048332.1|14361617|14370388|1|XM_034001210.2|XP_033857101.2|vascular_cell_adhesion_molecule_1b|8772	0
CACTIG010000023.1	35218696	.	g	gT	228.412	INS	AC=20;AD=12,23;ADF=6,14;ADR=6,9;AN=30;DP=475;DP4=62,53,161,162;FS=0;IDV=28;IMF=0.965517;MQ=60;MQ0F=0;RPBZ=-1.67663;SCBZ=0.188982;SGB=-0.693054;VDB=0.288084;INDEL;INS;TV	1/1:255,84,0:28:0:0,15:0,13:0,28	1/1:255,93,0:36:0:0,18:1,17:1,35	1/1:255,57,0:19:0:0,8:0,11:0,19	1/1:255,49,0:36:0:2,16:2,16:4,32	1/1:255,42,0:25:3:0,12:2,11:2,23	0/1:219,0,57:.:.:.:.:.	0/1:255,0,32:.:.:.:.:.	0/1:206,0,107:.:.:.:.:.	0/1:249,0,75:.:.:.:.:.	0/1:255,0,74:.:.:.:.:.	25	32	33	35	38	29	38	20	39	27	CACTIG010000023.1	35214774	35223497	NC_048332.1|14361617|14370388|1|XM_034001210.2|XP_033857101.2|vascular_cell_adhesion_molecule_1b|8772	0
CACTIG010000023.1	35218927	.	A	T	225.417	SNP	AC=20;AD=11,23;ADF=4,8;ADR=7,15;AN=30;BQBZ=-1.19878;DP=429;DP4=54,46,158,156;FS=0;MQ=60;MQ0F=0;RPBZ=0.451407;SGB=-0.692914;VDB=0.210073;SNP;TV	1/1:255,75,0:25:0:0,13:0,12:0,25	1/1:255,63,0:21:0:0,7:0,14:0,21	1/1:255,69,0:23:0:0,13:0,10:0,23	1/1:255,87,0:29:0:0,12:0,17:0,29	1/1:255,42,0:14:0:0,9:0,5:0,14	0/1:255,0,135:.:.:.:.:.	0/1:255,0,116:.:.:.:.:.	0/1:218,0,255:.:.:.:.:.	0/1:255,0,145:.:.:.:.:.	0/1:255,0,186:.:.:.:.:.	30	32	30	31	34	28	23	25	31	21	CACTIG010000023.1	35214774	35223497	NC_048332.1|14361617|14370388|1|XM_034001210.2|XP_033857101.2|vascular_cell_adhesion_molecule_1b|8772	0
CACTIG010000023.1	35218938	.	A	C	225.417	SNP	AC=20;AD=14,22;ADF=8,8;ADR=6,14;AN=30;BQBZ=-0.677194;DP=427;DP4=58,44,154,153;FS=0;MQ=60;MQ0F=0;RPBZ=0.92231;SGB=-0.692976;VDB=0.359087;SNP;TV	1/1:255,78,0:26:0:0,13:0,13:0,26	1/1:255,57,0:19:0:0,7:0,12:0,19	1/1:255,63,0:21:0:0,10:0,11:0,21	1/1:255,84,0:28:0:0,11:0,17:0,28	1/1:255,51,0:17:0:0,11:0,6:0,17	0/1:255,0,141:.:.:.:.:.	0/1:255,0,151:.:.:.:.:.	0/1:255,0,255:.:.:.:.:.	0/1:255,0,126:.:.:.:.:.	0/1:255,0,248:.:.:.:.:.	25	30	33	30	37	29	21	24	30	24	CACTIG010000023.1	35214774	35223497	NC_048332.1|14361617|14370388|1|XM_034001210.2|XP_033857101.2|vascular_cell_adhesion_molecule_1b|8772	0
CACTIG010000023.1	35218969	.	A	T	225.417	SNP	AC=20;AD=14,22;ADF=10,11;ADR=4,11;AN=30;BQBZ=-0.859931;DP=439;DP4=68,48,140,165;FS=0;MQ=60;MQ0F=0;RPBZ=0.423903;SCBZ=0.471405;SGB=-0.692914;VDB=0.824233;SNP;TV	1/1:255,75,0:25:0:0,11:0,14:0,25	1/1:255,57,0:19:0:0,9:0,10:0,19	1/1:255,63,0:21:0:0,8:0,13:0,21	1/1:255,87,0:29:0:0,10:0,19:0,29	1/1:255,57,0:19:0:0,14:0,5:0,19	0/1:255,0,152:.:.:.:.:.	0/1:255,0,153:.:.:.:.:.	0/1:220,0,255:.:.:.:.:.	0/1:255,0,105:.:.:.:.:.	0/1:255,0,240:.:.:.:.:.	23	28	36	36	37	28	22	22	32	23	CACTIG010000023.1	35214774	35223497	NC_048332.1|14361617|14370388|1|XM_034001210.2|XP_033857101.2|vascular_cell_adhesion_molecule_1b|8772	0
CACTIG010000023.1	35219480	.	A	ACAATGTTTTTCTAAGCTTTTACCT	206.417	INS	AC=16;AD=6,6;ADF=1,4;ADR=5,2;AN=22;DP=230;DP4=26,33,31,27;FS=0;IDV=7;IMF=0.35;MQ=42;MQ0F=0;MQBZ=-4.3589;MQSBZ=-0.0493464;RPBZ=-3.14319;SCBZ=-3.61715;SGB=-0.651104;VDB=0.00497727;INDEL;INS;TV	1/1:236,24,0:8:0:0,5:0,3:0,8	1/1:126,9,0:3:0:0,2:0,1:0,3	1/1:224,21,0:7:0:0,3:0,4:0,7	1/1:184,12,0:7:0:0,4:1,2:1,6	1/1:143,12,0:4:0:0,1:0,3:0,4	./.:.:.:.:.:.:.	0/1:93,0,167:.:.:.:.:.	0/1:134,0,255:.:.:.:.:.	0/1:184,0,246:.:.:.:.:.	./.:.:.:.:.:.:.	9	16	35	15	24	20	18	22	26	19	CACTIG010000023.1	35214774	35223497	NC_048332.1|14361617|14370388|1|XM_034001210.2|XP_033857101.2|vascular_cell_adhesion_molecule_1b|8772	0
CACTIG010000023.1	35219724	.	A	C	225.417	SNP	AC=20;AD=7,35;ADF=5,18;ADR=2,17;AN=30;BQBZ=1.68659;DP=479;DP4=48,46,168,204;FS=0;MQ=30;MQ0F=0;MQBZ=-4.16095;MQSBZ=-0.473093;RPBZ=-0.566575;SCBZ=-0.521444;SGB=-0.693021;VDB=0.822947;SNP;TV	1/1:255,81,0:27:0:0,16:0,11:0,27	1/1:255,93,0:31:0:0,19:0,12:0,31	1/1:255,60,0:20:0:0,10:0,10:0,20	1/1:255,69,0:23:0:0,11:0,12:0,23	1/1:255,93,0:31:0:0,16:0,15:0,31	0/1:255,0,130:.:.:.:.:.	0/1:232,0,46:.:.:.:.:.	0/1:176,0,255:.:.:.:.:.	0/1:248,0,137:.:.:.:.:.	0/1:255,0,79:.:.:.:.:.	35	34	34	27	42	27	31	20	27	32	CACTIG010000023.1	35214774	35223497	NC_048332.1|14361617|14370388|1|XM_034001210.2|XP_033857101.2|vascular_cell_adhesion_molecule_1b|8772	0
CACTIG010000023.1	35219755	.	A	T	225.417	SNP	AC=20;AD=8,30;ADF=5,16;ADR=3,14;AN=30;BQBZ=0.318858;DP=479;DP4=54,44,175,187;FS=0;MQ=35;MQ0F=0;MQBZ=-4.19849;MQSBZ=0.377058;RPBZ=-1.22451;SCBZ=1.01389;SGB=-0.693141;VDB=0.804452;SNP;TV	1/1:255,111,0:37:0:0,20:0,17:0,37	1/1:255,99,0:33:0:0,17:0,16:0,33	1/1:218,45,0:15:0:0,9:0,6:0,15	1/1:255,69,0:23:0:0,12:0,11:0,23	1/1:255,99,0:33:0:0,21:0,12:0,33	0/1:255,0,150:.:.:.:.:.	0/1:255,0,69:.:.:.:.:.	0/1:158,0,255:.:.:.:.:.	0/1:255,0,191:.:.:.:.:.	0/1:254,0,111:.:.:.:.:.	31	36	29	32	41	37	34	15	26	35	CACTIG010000023.1	35214774	35223497	NC_048332.1|14361617|14370388|1|XM_034001210.2|XP_033857101.2|vascular_cell_adhesion_molecule_1b|8772	0
CACTIG010000023.1	35219776	.	A	C	225.417	SNP	AC=20;AD=7,24;ADF=4,10;ADR=3,14;AN=30;BQBZ=-1.05918;DP=435;DP4=54,46,160,151;FS=0;MQ=38;MQ0F=0;MQBZ=-3.43174;MQSBZ=0.703506;RPBZ=-0.545481;SCBZ=-0.696931;SGB=-0.693136;VDB=0.13626;SNP;TV	1/1:255,105,0:35:0:0,19:0,16:0,35	1/1:255,81,0:27:0:0,14:0,13:0,27	1/1:224,48,0:16:0:0,8:0,8:0,16	1/1:255,72,0:24:0:0,14:0,10:0,24	1/1:255,84,0:28:0:0,21:0,7:0,28	0/1:219,0,106:.:.:.:.:.	0/1:229,0,95:.:.:.:.:.	0/1:158,0,255:.:.:.:.:.	0/1:233,0,197:.:.:.:.:.	0/1:205,0,100:.:.:.:.:.	22	30	34	32	32	35	30	19	26	31	CACTIG010000023.1	35214774	35223497	NC_048332.1|14361617|14370388|1|XM_034001210.2|XP_033857101.2|vascular_cell_adhesion_molecule_1b|8772	0
CACTIG010000023.1	35219796	.	A	G	225.417	SNP	AC=20;AD=10,23;ADF=2,10;ADR=8,13;AN=30;BQBZ=0.483487;DP=445;DP4=42,54,180,140;FS=0;MQ=43;MQ0F=0;MQBZ=-1.88051;MQSBZ=0.346892;RPBZ=-0.236673;SCBZ=0.5;SGB=-0.693144;VDB=0.474367;SNP;TS	1/1:255,117,0:39:0:0,20:0,19:0,39	1/1:255,99,0:33:0:0,20:0,13:0,33	1/1:255,48,0:16:0:0,10:0,6:0,16	1/1:255,81,0:27:0:0,18:0,9:0,27	1/1:255,96,0:32:0:0,24:0,8:0,32	0/1:255,0,67:.:.:.:.:.	0/1:225,0,127:.:.:.:.:.	0/1:212,0,255:.:.:.:.:.	0/1:242,0,186:.:.:.:.:.	0/1:238,0,149:.:.:.:.:.	22	28	33	27	36	42	36	21	27	33	CACTIG010000023.1	35214774	35223497	NC_048332.1|14361617|14370388|1|XM_034001210.2|XP_033857101.2|vascular_cell_adhesion_molecule_1b|8772	0
CACTIG010000023.1	35219825	.	A	C	225.421	SNP	AC=20;AD=11,16;ADF=5,7;ADR=6,9;AN=30;BQBZ=-0.0650887;DP=442;DP4=46,56,179,139;FS=0;MQ=55;MQ0F=0;MQBZ=-1.24838;MQSBZ=-0.357499;RPBZ=0.397975;SCBZ=0.6742;SGB=-0.693127;VDB=0.193232;SNP;TV	1/1:255,96,0:33:0:0,15:0,17:0,32	1/1:255,120,0:40:0:0,22:0,18:0,40	1/1:255,51,0:17:0:0,11:0,6:0,17	1/1:255,75,0:25:0:0,19:0,6:0,25	1/1:255,96,0:32:0:0,20:0,12:0,32	0/1:221,0,98:.:.:.:.:.	0/1:255,0,153:.:.:.:.:.	0/1:231,0,255:.:.:.:.:.	0/1:255,0,173:.:.:.:.:.	0/1:255,0,196:.:.:.:.:.	18	29	33	35	31	34	43	20	26	33	CACTIG010000023.1	35214774	35223497	NC_048332.1|14361617|14370388|1|XM_034001210.2|XP_033857101.2|vascular_cell_adhesion_molecule_1b|8772	0
CACTIG010000023.1	35220537	.	A	G	225.417	SNP	AC=20;AD=8,26;ADF=4,10;ADR=4,16;AN=30;BQBZ=-0.0524856;DP=431;DP4=38,46,178,150;FS=0;MQ=60;MQ0F=0;RPBZ=1.56221;SGB=-0.692976;VDB=0.347889;SNP;TS	1/1:255,78,0:26:0:0,15:0,11:0,26	1/1:255,78,0:26:0:0,15:0,11:0,26	1/1:255,60,0:20:0:0,12:0,8:0,20	1/1:255,96,0:32:0:0,19:0,13:0,32	1/1:255,54,0:18:0:0,11:0,7:0,18	0/1:255,0,169:.:.:.:.:.	0/1:255,0,177:.:.:.:.:.	0/1:211,0,237:.:.:.:.:.	0/1:255,0,90:.:.:.:.:.	0/1:255,0,133:.:.:.:.:.	33	33	25	33	34	26	28	20	33	22	CACTIG010000023.1	35214774	35223497	NC_048332.1|14361617|14370388|1|XM_034001210.2|XP_033857101.2|vascular_cell_adhesion_molecule_1b|8772	0
CACTIG010000023.1	35220562	.	A	C	225.421	SNP	AC=20;AD=6,28;ADF=4,13;ADR=2,15;AN=30;BQBZ=-0.230202;DP=421;DP4=36,42,176,156;FS=0;MQ=60;MQ0F=0;RPBZ=1.67523;SGB=-0.692562;VDB=0.980208;SNP;TV	1/1:255,63,0:22:0:0,8:0,13:0,21	1/1:255,81,0:27:0:0,16:0,11:0,27	1/1:255,63,0:21:0:0,13:0,8:0,21	1/1:255,96,0:32:0:0,19:0,13:0,32	1/1:255,60,0:20:0:0,10:0,10:0,20	0/1:255,0,166:.:.:.:.:.	0/1:255,0,206:.:.:.:.:.	0/1:255,0,173:.:.:.:.:.	0/1:255,0,59:.:.:.:.:.	0/1:255,0,76:.:.:.:.:.	32	29	28	26	34	24	29	25	33	23	CACTIG010000023.1	35214774	35223497	NC_048332.1|14361617|14370388|1|XM_034001210.2|XP_033857101.2|vascular_cell_adhesion_molecule_1b|8772	0
CACTIG010000023.1	35221134	.	T	C	225.417	SNP	AC=20;AD=12,35;ADF=7,17;ADR=5,18;AN=30;BQBZ=-1.54292;DP=514;DP4=36,44,196,222;FS=0;MQ=60;MQ0F=0;MQBZ=-0.65938;MQSBZ=-0.806226;RPBZ=0.0392124;SGB=-0.693141;VDB=0.383713;SNP;TS	1/1:255,111,0:37:0:0,17:0,20:0,37	1/1:255,102,0:34:0:0,13:0,21:0,34	1/1:255,66,0:22:0:0,11:0,11:0,22	1/1:255,57,0:19:0:0,10:0,9:0,19	1/1:255,54,0:18:0:0,9:0,9:0,18	0/1:255,0,180:.:.:.:.:.	0/1:255,0,18:.:.:.:.:.	0/1:255,0,153:.:.:.:.:.	0/1:255,0,61:.:.:.:.:.	0/1:255,0,122:.:.:.:.:.	34	42	30	39	50	38	35	24	22	21	CACTIG010000023.1	35214774	35223497	NC_048332.1|14361617|14370388|1|XM_034001210.2|XP_033857101.2|vascular_cell_adhesion_molecule_1b|8772	0
CACTIG010000023.1	35221177	.	T	C	225.417	SNP	AC=20;AD=12,23;ADF=8,11;ADR=4,12;AN=30;BQBZ=0.395567;DP=471;DP4=48,46,174,194;FS=0;MQ=60;MQ0F=0;MQBZ=-0.690066;MQSBZ=-0.968246;RPBZ=0.740406;SGB=-0.693136;VDB=0.747899;SNP;TS	1/1:255,105,0:35:0:0,19:0,16:0,35	1/1:255,90,0:30:0:0,13:0,17:0,30	1/1:255,66,0:22:0:0,10:0,12:0,22	1/1:255,78,0:26:0:0,12:0,14:0,26	1/1:255,63,0:21:0:0,12:0,9:0,21	0/1:255,0,175:.:.:.:.:.	0/1:255,0,150:.:.:.:.:.	0/1:255,0,168:.:.:.:.:.	0/1:255,0,73:.:.:.:.:.	0/1:255,0,181:.:.:.:.:.	31	41	25	36	35	36	32	24	28	24	CACTIG010000023.1	35214774	35223497	NC_048332.1|14361617|14370388|1|XM_034001210.2|XP_033857101.2|vascular_cell_adhesion_molecule_1b|8772	0
CACTIG010000023.1	35221236	.	A	G	225.417	SNP	AC=20;AD=9,26;ADF=4,9;ADR=5,17;AN=30;BQBZ=-0.948058;DP=476;DP4=40,42,172,208;FS=0;MQ=60;MQ0F=0;MQBZ=-0.766965;MQSBZ=0.707107;RPBZ=0.025124;SCBZ=1.10613;SGB=-0.693021;VDB=0.891214;SNP;TS	1/1:255,81,0:27:0:0,16:0,11:0,27	1/1:255,69,0:23:0:0,9:0,14:0,23	1/1:255,60,0:20:0:0,7:0,13:0,20	1/1:255,96,0:32:0:0,22:0,10:0,32	1/1:255,90,0:30:0:0,18:0,12:0,30	0/1:255,0,188:.:.:.:.:.	0/1:255,0,118:.:.:.:.:.	0/1:255,0,170:.:.:.:.:.	0/1:255,0,42:.:.:.:.:.	0/1:255,0,161:.:.:.:.:.	29	37	29	42	36	27	23	20	36	31	CACTIG010000023.1	35214774	35223497	NC_048332.1|14361617|14370388|1|XM_034001210.2|XP_033857101.2|vascular_cell_adhesion_molecule_1b|8772	0
CACTIG010000023.1	35221646	.	A	T	225.421	SNP	AC=20;AD=7,29;ADF=6,9;ADR=1,20;AN=30;BQBZ=-0.57446;DP=496;DP4=42,44,162,225;FS=0;MQ=57;MQ0F=0;MQBZ=-1.78377;MQSBZ=0.986007;RPBZ=-1.7853;SGB=-0.69311;VDB=0.990852;SNP;TV	1/1:255,93,0:31:0:0,13:0,18:0,31	1/1:255,72,0:24:0:0,8:0,16:0,24	1/1:255,75,0:26:0:0,12:0,13:0,25	1/1:255,108,0:36:0:0,19:0,17:0,36	1/1:255,114,0:38:0:0,14:0,24:0,38	0/1:255,0,124:.:.:.:.:.	0/1:255,0,164:.:.:.:.:.	0/1:255,0,246:.:.:.:.:.	0/1:255,0,67:.:.:.:.:.	0/1:255,0,86:.:.:.:.:.	31	27	34	41	37	32	26	28	37	39	CACTIG010000023.1	35214774	35223497	NC_048332.1|14361617|14370388|1|XM_034001210.2|XP_033857101.2|vascular_cell_adhesion_molecule_1b|8772	0
CACTIG010000023.1	35221814	.	A	G	225.421	SNP	AC=20;AD=10,31;ADF=4,15;ADR=6,16;AN=30;BQBZ=0.10853;DP=477;DP4=56,44,192,167;FS=0;MQ=60;MQ0F=0;RPBZ=-0.0352852;SCBZ=-1.46385;SGB=-0.693139;VDB=0.059926;SNP;TS	1/1:255,108,0:36:0:0,26:0,10:0,36	1/1:255,90,0:30:0:0,14:0,16:0,30	1/1:255,54,0:18:0:0,10:0,8:0,18	1/1:255,111,0:38:0:0,19:0,18:0,37	1/1:255,75,0:25:0:0,11:0,14:0,25	0/1:255,0,134:.:.:.:.:.	0/1:255,0,76:.:.:.:.:.	0/1:255,0,255:.:.:.:.:.	0/1:255,0,175:.:.:.:.:.	0/1:255,0,172:.:.:.:.:.	23	23	35	40	42	40	32	18	39	29	CACTIG010000023.1	35214774	35223497	NC_048332.1|14361617|14370388|1|XM_034001210.2|XP_033857101.2|vascular_cell_adhesion_molecule_1b|8772	0
CACTIG010000023.1	35222048	.	T	C	225.417	SNP	AC=20;AD=8,26;ADF=6,15;ADR=2,11;AN=30;BQBZ=0.101857;DP=432;DP4=52,30,212,130;FS=0;MQ=60;MQ0F=0;RPBZ=-0.40812;SGB=-0.69312;VDB=0.751116;SNP;TS	1/1:255,96,0:32:0:0,18:0,14:0,32	1/1:255,87,0:29:0:0,21:0,8:0,29	1/1:255,63,0:21:0:0,11:0,10:0,21	1/1:255,99,0:33:0:0,15:0,18:0,33	1/1:255,75,0:25:0:0,17:0,8:0,25	0/1:255,0,130:.:.:.:.:.	0/1:246,0,225:.:.:.:.:.	0/1:236,0,218:.:.:.:.:.	0/1:255,0,22:.:.:.:.:.	0/1:255,0,130:.:.:.:.:.	30	27	34	22	38	33	31	21	34	27	CACTIG010000023.1	35214774	35223497	NC_048332.1|14361617|14370388|1|XM_034001210.2|XP_033857101.2|vascular_cell_adhesion_molecule_1b|8772	0
CACTIG010000023.1	35222551	.	A	G	225.422	SNP	AC=20;AD=5,31;ADF=4,17;ADR=1,14;AN=30;BQBZ=0.910325;DP=466;DP4=40,34,207,161;FS=0;MQ=60;MQ0F=0;RPBZ=1.12245;SGB=-0.693054;VDB=0.314621;SNP;TS	1/1:255,84,0:28:0:0,15:0,13:0,28	1/1:255,108,0:36:0:0,19:0,17:0,36	1/1:255,114,0:38:0:0,17:0,21:0,38	1/1:255,93,0:31:0:0,20:0,11:0,31	1/1:255,90,0:31:0:0,13:0,17:0,30	0/1:255,0,64:.:.:.:.:.	0/1:255,0,87:.:.:.:.:.	0/1:169,0,255:.:.:.:.:.	0/1:255,0,205:.:.:.:.:.	0/1:255,0,38:.:.:.:.:.	21	27	23	37	40	30	39	38	32	36	CACTIG010000023.1	35214774	35223497	NC_048332.1|14361617|14370388|1|XM_034001210.2|XP_033857101.2|vascular_cell_adhesion_molecule_1b|8772	0
CACTIG010000023.1	35222849	.	T	C	225.417	SNP	AC=20;AD=6,11;ADF=5,6;ADR=1,5;AN=30;BQBZ=-1.32453;DP=390;DP4=54,24,136,159;FS=0;MQ=60;MQ0F=0;RPBZ=1.68847;SCBZ=0.772328;SGB=-0.692352;VDB=0.0414387;SNP;TS	1/1:255,63,0:21:0:0,12:0,9:0,21	1/1:255,90,0:30:0:0,14:0,16:0,30	1/1:255,45,0:15:0:0,9:0,6:0,15	1/1:255,75,0:25:0:0,11:0,14:0,25	1/1:255,60,0:20:0:0,12:0,8:0,20	0/1:255,0,16:.:.:.:.:.	0/1:255,0,44:.:.:.:.:.	0/1:255,0,255:.:.:.:.:.	0/1:255,0,117:.:.:.:.:.	0/1:221,0,119:.:.:.:.:.	20	34	41	26	17	22	32	17	27	22	CACTIG010000023.1	35214774	35223497	NC_048332.1|14361617|14370388|1|XM_034001210.2|XP_033857101.2|vascular_cell_adhesion_molecule_1b|8772	0
CACTIG010000023.1	35223440	.	G	C	225.417	SNP	AC=20;AD=6,21;ADF=3,12;ADR=3,9;AN=30;BQBZ=-0.494413;DP=336;DP4=30,24,180,97;FS=0;MQ=60;MQ0F=0;RPBZ=-0.27735;SCBZ=0.485071;SGB=-0.692562;VDB=0.381714;SNP;TV	1/1:255,66,0:22:0:0,18:0,4:0,22	1/1:255,90,0:30:0:0,23:0,7:0,30	1/1:255,66,0:22:0:0,11:0,11:0,22	1/1:255,51,0:17:0:0,8:0,9:0,17	1/1:255,72,0:24:0:0,10:0,14:0,24	0/1:194,0,59:.:.:.:.:.	0/1:255,0,64:.:.:.:.:.	0/1:241,0,176:.:.:.:.:.	0/1:255,0,62:.:.:.:.:.	0/1:255,0,114:.:.:.:.:.	12	22	24	24	27	22	31	23	18	24	CACTIG010000023.1	35214774	35223497	NC_048332.1|14361617|14370388|1|XM_034001210.2|XP_033857101.2|vascular_cell_adhesion_molecule_1b|8772	0
CACTIG010000023.1	36589772	.	T	C	152.416	SNP	AC=12;AD=2,2;ADF=0,2;ADR=2,0;AN=14;BQBZ=0.942809;DP=28;DP4=0,5,10,13;FS=0;MQ=40;MQ0F=0;MQBZ=1.34164;MQSBZ=-0.942809;RPBZ=-1.34164;SCBZ=0.57735;SGB=-0.556411;VDB=0.0117389;SNP;TS	1/1:102,12,0:4:0:0,1:0,3:0,4	1/1:75,5,0:4:0:0,2:1,1:1,3	1/1:83,9,0:3:0:0,0:0,3:0,3	1/1:70,6,0:2:0:0,1:0,1:0,2	1/1:182,21,0:7:0:0,2:0,5:0,7	./.:.:.:.:.:.:.	./.:.:.:.:.:.:.	0/1:52,0,56:.:.:.:.:.	./.:.:.:.:.:.:.	./.:.:.:.:.:.:.	5	5	4	6	7	4	6	4	3	7	CACTIG010000023.1	36494908	36584022	NC_048332.1|12983236|13072628|-1|XM_034013160.2|XP_033869051.1|parafibromin|89393	5750
CACTIG010000023.1	36590948	.	C	A	225.417	SNP	AC=20;AD=8,28;ADF=3,11;ADR=5,17;AN=30;BQBZ=-1.83752;DP=477;DP4=40,44,195,191;FS=0;MQ=60;MQ0F=0;MQSBZ=-0.235581;RPBZ=-0.0811516;SCBZ=0.534522;SGB=-0.692914;VDB=0.323646;SNP;TV	1/1:255,75,0:25:0:0,15:0,10:0,25	1/1:255,72,0:24:0:0,15:0,9:0,24	1/1:255,93,0:31:0:0,19:0,12:0,31	1/1:255,81,0:27:0:0,14:0,13:0,27	1/1:255,81,0:27:0:0,14:0,13:0,27	0/1:255,0,219:.:.:.:.:.	0/1:255,0,110:.:.:.:.:.	0/1:255,0,91:.:.:.:.:.	0/1:255,0,150:.:.:.:.:.	0/1:255,0,156:.:.:.:.:.	32	28	49	29	39	27	24	32	29	27	CACTIG010000023.1	36494908	36584022	NC_048332.1|12983236|13072628|-1|XM_034013160.2|XP_033869051.1|parafibromin|89393	6926
CACTIG010000023.1	36591240	.	T	C	225.417	SNP	AC=20;AD=3,14;ADF=2,0;ADR=1,14;AN=30;BQBZ=0.23318;DP=276;DP4=30,26,38,170;FS=0;MQ=60;MQ0F=0;MQBZ=-0.603023;MQSBZ=-0.683313;RPBZ=0.78687;SCBZ=1.77151;SGB=-0.690438;VDB=0.532381;SNP;TS	1/1:255,51,0:17:0:0,2:0,15:0,17	1/1:255,72,0:24:0:0,3:0,21:0,24	1/1:255,63,0:21:0:0,4:0,17:0,21	1/1:255,48,0:16:0:0,4:0,12:0,16	1/1:255,42,0:14:0:0,7:0,7:0,14	0/1:195,0,66:.:.:.:.:.	0/1:220,0,115:.:.:.:.:.	0/1:151,0,247:.:.:.:.:.	0/1:221,0,72:.:.:.:.:.	0/1:160,0,79:.:.:.:.:.	19	24	26	20	30	24	35	23	26	21	CACTIG010000023.1	36494908	36584022	NC_048332.1|12983236|13072628|-1|XM_034013160.2|XP_033869051.1|parafibromin|89393	7218
CACTIG010000023.1	36591308	.	G	A	225.417	SNP	AC=16;AD=4,2;ADF=2,1;ADR=2,1;AN=22;BQBZ=-0.879664;DP=113;DP4=16,22,29,44;FS=0;MQ=56;MQ0F=0;MQBZ=2.26158;MQSBZ=0.353553;RPBZ=1.85932;SGB=-0.662043;VDB=0.00581748;SNP;TS	1/1:237,27,0:9:0:0,3:0,6:0,9	1/1:192,21,0:7:0:0,3:0,4:0,7	1/1:255,39,0:13:0:0,6:0,7:0,13	1/1:91,9,0:3:0:0,1:0,2:0,3	1/1:192,24,0:8:0:0,1:0,7:0,8	./.:.:.:.:.:.:.	0/1:181,0,69:.:.:.:.:.	0/1:100,0,218:.:.:.:.:.	0/1:49,0,114:.:.:.:.:.	./.:.:.:.:.:.:.	3	13	16	7	6	11	7	13	3	9	CACTIG010000023.1	36494908	36584022	NC_048332.1|12983236|13072628|-1|XM_034013160.2|XP_033869051.1|parafibromin|89393	7286
CACTIG010000023.1	36596868	.	T	C	225.417	SNP	AC=20;AD=12,18;ADF=6,11;ADR=6,7;AN=30;BQBZ=2.73435;DP=481;DP4=70,64,163,160;FS=0;MQ=60;MQ0F=0;MQSBZ=0.899735;RPBZ=-0.326545;SCBZ=0.57735;SGB=-0.692976;VDB=0.266316;SNP;TS	1/1:255,78,0:26:0:0,16:0,10:0,26	1/1:255,114,0:38:0:0,21:0,17:0,38	1/1:255,72,0:24:0:0,13:0,11:0,24	1/1:255,90,0:30:0:0,17:0,13:0,30	1/1:255,75,0:25:0:0,16:0,9:0,25	0/1:255,0,117:.:.:.:.:.	0/1:255,0,225:.:.:.:.:.	0/1:93,0,255:.:.:.:.:.	0/1:177,0,255:.:.:.:.:.	0/1:255,0,208:.:.:.:.:.	33	51	22	32	32	28	42	29	33	26	CACTIG010000023.1	36494908	36584022	NC_048332.1|12983236|13072628|-1|XM_034013160.2|XP_033869051.1|parafibromin|89393	12846
CACTIG010000023.1	36600612	.	T	C	225.746	SNP	AC=20;AD=11,29;ADF=5,12;ADR=6,17;AN=30;BQBZ=-1.67278;DP=449;DP4=43,46,172,172;FS=0;MQ=60;MQ0F=0;RPBZ=-0.182735;SCBZ=0.431595;SGB=-0.692352;VDB=0.0503081;SNP;TS	1/1:255,60,0:21:0:0,11:0,9:0,20	1/1:255,60,0:20:0:0,9:0,11:0,20	1/1:255,0,3:19:0:1,10:0,8:1,18	1/1:255,108,0:36:0:0,19:0,17:0,36	1/1:255,63,0:21:0:0,15:0,6:0,21	0/1:255,0,75:.:.:.:.:.	0/1:255,0,139:.:.:.:.:.	0/1:255,0,174:.:.:.:.:.	0/1:255,0,170:.:.:.:.:.	0/1:255,0,167:.:.:.:.:.	21	35	38	32	42	24	22	22	37	23	CACTIG010000023.1	36494908	36584022	NC_048332.1|12983236|13072628|-1|XM_034013160.2|XP_033869051.1|parafibromin|89393	16590
CACTIG010000023.1	36603152	.	G	C	225.417	SNP	AC=18;AD=8,15;ADF=4,7;ADR=4,8;AN=26;BQBZ=0.48263;DP=279;DP4=22,42,97,110;FS=0;MQ=52;MQ0F=0;MQBZ=-0.373979;MQSBZ=1.14884;RPBZ=-0.26135;SCBZ=-1.36931;SGB=-0.69168;VDB=0.677303;SNP;TV	1/1:255,57,0:19:0:0,7:0,12:0,19	1/1:255,75,0:25:0:0,15:0,10:0,25	1/1:223,36,0:12:0:0,7:0,5:0,12	1/1:255,60,0:20:0:0,11:0,9:0,20	1/1:255,87,0:29:0:0,15:0,14:0,29	0/1:85,0,226:.:.:.:.:.	0/1:207,0,144:.:.:.:.:.	0/1:255,0,91:.:.:.:.:.	0/1:112,0,151:.:.:.:.:.	./.:.:.:.:.:.:.	15	23	24	23	10	19	26	13	21	33	CACTIG010000023.1	36494908	36584022	NC_048332.1|12983236|13072628|-1|XM_034013160.2|XP_033869051.1|parafibromin|89393	19130
CACTIG010000023.1	36971467	.	G	A	225.417	SNP	AC=20;AD=17,14;ADF=5,9;ADR=12,5;AN=30;BQBZ=-1.74322;DP=412;DP4=54,44,145,144;FS=0;MQ=60;MQ0F=0;RPBZ=-0.0251125;SCBZ=0.766965;SGB=-0.692976;VDB=0.0758775;SNP;TS	1/1:255,78,0:26:0:0,18:0,8:0,26	1/1:255,63,0:21:0:0,9:0,12:0,21	1/1:255,54,0:18:0:0,9:0,9:0,18	1/1:255,66,0:22:0:0,12:0,10:0,22	1/1:255,66,0:22:0:0,11:0,11:0,22	0/1:255,0,200:.:.:.:.:.	0/1:255,0,70:.:.:.:.:.	0/1:255,0,173:.:.:.:.:.	0/1:254,0,115:.:.:.:.:.	0/1:211,0,254:.:.:.:.:.	27	32	32	24	31	31	26	26	23	24	CACTIG010000023.1	36930837	36969171	NC_048332.1|12152486|12182273|-1|XM_034924354.1|XP_034780245.1|complement_factor_H-related_protein_1-like|29788	2296
CACTIG010000023.1	37871299	.	T	TGTAGGC	205.417	INS	AC=10;AD=0,3;ADF=0,2;ADR=0,1;AN=10;DP=51;DP4=0,0,16,1;FS=0;IDV=10;IMF=0.909091;MQ=60;MQ0F=0;MQBZ=-0.316228;MQSBZ=-2;RPBZ=-1.58474;SCBZ=-2.011;SGB=-0.590765;VDB=0.422633;INDEL;INS;TV	1/1:212,15,0:5:0:0,5:0,0:0,5	1/1:235,18,0:6:0:0,6:0,0:0,6	1/1:60,3,0:1:0:0,1:0,0:0,1	1/1:67,6,0:2:0:0,2:0,0:0,2	1/1:167,9,0:3:0:0,2:0,1:0,3	./.:.:.:.:.:.:.	./.:.:.:.:.:.:.	./.:.:.:.:.:.:.	./.:.:.:.:.:.:.	./.:.:.:.:.:.:.	5	7	19	9	7	12	12	11	9	14	CACTIG010000023.1	37863661	37870780	NC_048332.1|11727127|11734194|1|XM_034018378.2|XP_033874269.1|testicular_spindle-associated_protein_SHCBP1L-like|7068	519
CACTIG010000023.1	40661166	.	A	C	225.421	SNP	AC=20;AD=9,27;ADF=3,17;ADR=6,10;AN=30;BQBZ=-1.43801;DP=429;DP4=22,50,162,165;FS=0;MQ=57;MQ0F=0;MQBZ=-1.06293;MQSBZ=1.12831;RPBZ=0.433673;SCBZ=-0.4481;SGB=-0.692914;VDB=0.997284;SNP;TV	1/1:255,72,0:25:0:0,16:0,8:0,24	1/1:255,75,0:25:0:0,14:0,11:0,25	1/1:255,57,0:19:0:0,11:0,8:0,19	1/1:255,63,0:21:0:0,9:0,12:0,21	1/1:255,63,0:21:0:0,9:0,12:0,21	0/1:200,0,236:.:.:.:.:.	0/1:255,0,44:.:.:.:.:.	0/1:255,0,35:.:.:.:.:.	0/1:255,0,118:.:.:.:.:.	0/1:255,0,149:.:.:.:.:.	26	30	24	39	38	29	28	21	25	25	CACTIG010000023.1	40691409	40725395	NC_048332.1|8810420|8844842|1|XM_034014071.2|XP_033869962.2|RAS_protein_activator_like_2,_transcript_variant_X5|34423	30243
CACTIG010000023.1	40661306	.	C	T	225.422	SNP	AC=20;AD=4,26;ADF=3,11;ADR=1,15;AN=30;BQBZ=0.624786;DP=385;DP4=32,20,134,192;FS=0;MQ=60;MQ0F=0;RPBZ=-1.27;SGB=-0.693144;VDB=0.475794;SNP;TS	1/1:255,117,0:39:0:0,18:0,21:0,39	1/1:255,93,0:32:0:0,15:0,16:0,31	1/1:255,69,0:24:0:0,14:0,9:0,23	1/1:255,48,0:16:0:0,6:0,10:0,16	1/1:255,99,0:33:0:0,17:0,16:0,33	0/1:245,0,181:.:.:.:.:.	0/1:255,0,58:.:.:.:.:.	0/1:249,0,46:.:.:.:.:.	0/1:253,0,84:.:.:.:.:.	0/1:255,0,38:.:.:.:.:.	22	25	17	24	31	40	33	25	18	35	CACTIG010000023.1	40691409	40725395	NC_048332.1|8810420|8844842|1|XM_034014071.2|XP_033869962.2|RAS_protein_activator_like_2,_transcript_variant_X5|34423	30103
CACTIG010000023.1	40661323	.	A	T	228.37	SNP	AC=20;AD=4,26;ADF=3,11;ADR=1,15;AN=30;BQBZ=1.922;DP=403;DP4=31,18,141,202;FS=0;MQ=60;MQ0F=0;RPBZ=-1.15604;SGB=-0.693146;VDB=0.912511;SNP;TV	1/1:255,129,0:43:0:0,18:0,25:0,43	1/1:255,90,0:36:0:1,18:0,17:1,35	1/1:255,60,0:20:0:0,10:0,10:0,20	1/1:255,60,0:20:0:0,10:0,10:0,20	1/1:255,105,0:35:0:0,15:0,20:0,35	0/1:251,0,159:.:.:.:.:.	0/1:255,0,26:.:.:.:.:.	0/1:255,0,59:.:.:.:.:.	0/1:255,0,142:.:.:.:.:.	0/1:255,0,43:.:.:.:.:.	19	27	21	26	30	43	36	23	22	37	CACTIG010000023.1	40691409	40725395	NC_048332.1|8810420|8844842|1|XM_034014071.2|XP_033869962.2|RAS_protein_activator_like_2,_transcript_variant_X5|34423	30086
CACTIG010000023.1	40661421	.	G	A	225.421	SNP	AC=20;AD=10,22;ADF=5,9;ADR=5,13;AN=30;BQBZ=-1.00878;DP=430;DP4=44,38,177,160;FS=0;MQ=60;MQ0F=0;RPBZ=-0.854739;SGB=-0.693097;VDB=0.912771;SNP;TS	1/1:255,90,0:30:0:0,16:0,14:0,30	1/1:255,99,0:34:0:0,13:0,20:0,33	1/1:255,72,0:24:0:0,9:0,15:0,24	1/1:255,72,0:24:0:0,16:0,8:0,24	1/1:255,81,0:27:0:0,14:0,13:0,27	0/1:255,0,189:.:.:.:.:.	0/1:255,0,199:.:.:.:.:.	0/1:236,0,134:.:.:.:.:.	0/1:255,0,76:.:.:.:.:.	0/1:255,0,150:.:.:.:.:.	27	36	23	26	32	31	38	24	25	30	CACTIG010000023.1	40691409	40725395	NC_048332.1|8810420|8844842|1|XM_034014071.2|XP_033869962.2|RAS_protein_activator_like_2,_transcript_variant_X5|34423	29988
CACTIG010000023.1	40661543	.	A	G	225.417	SNP	AC=20;AD=9,27;ADF=5,17;ADR=4,10;AN=30;BQBZ=-0.172837;DP=427;DP4=44,42,152,164;FS=0;MQ=60;MQ0F=0;MQBZ=-0.620174;MQSBZ=-1.18322;RPBZ=-1.88349;SCBZ=0.68313;SGB=-0.692914;VDB=0.163287;SNP;TS	1/1:255,75,0:25:0:0,8:0,17:0,25	1/1:255,72,0:24:0:0,8:0,16:0,24	1/1:255,45,0:15:0:0,8:0,7:0,15	1/1:255,75,0:25:0:0,11:0,14:0,25	1/1:255,69,0:23:0:0,11:0,12:0,23	0/1:195,0,255:.:.:.:.:.	0/1:255,0,139:.:.:.:.:.	0/1:255,0,170:.:.:.:.:.	0/1:255,0,77:.:.:.:.:.	0/1:255,0,156:.:.:.:.:.	25	22	37	32	40	27	26	17	29	24	CACTIG010000023.1	40691409	40725395	NC_048332.1|8810420|8844842|1|XM_034014071.2|XP_033869962.2|RAS_protein_activator_like_2,_transcript_variant_X5|34423	29866
CACTIG010000023.1	40661562	.	C	T	225.417	SNP	AC=20;AD=8,26;ADF=5,15;ADR=3,11;AN=30;BQBZ=-0.844224;DP=433;DP4=42,46,148,181;FS=0;MQ=60;MQ0F=0;RPBZ=-0.874339;SCBZ=0.65938;SGB=-0.692831;VDB=0.288052;SNP;TS	1/1:255,72,0:24:0:0,6:0,18:0,24	1/1:255,69,0:23:0:0,8:0,15:0,23	1/1:255,60,0:20:0:0,10:0,10:0,20	1/1:255,87,0:29:0:0,14:0,15:0,29	1/1:255,57,0:19:0:0,10:0,9:0,19	0/1:225,0,240:.:.:.:.:.	0/1:255,0,121:.:.:.:.:.	0/1:255,0,173:.:.:.:.:.	0/1:255,0,114:.:.:.:.:.	0/1:255,0,134:.:.:.:.:.	26	28	35	33	37	26	26	21	32	21	CACTIG010000023.1	40691409	40725395	NC_048332.1|8810420|8844842|1|XM_034014071.2|XP_033869962.2|RAS_protein_activator_like_2,_transcript_variant_X5|34423	29847
CACTIG010000023.1	40661634	.	G	C	225.417	SNP	AC=20;AD=10,28;ADF=8,10;ADR=2,18;AN=30;BQBZ=0.27686;DP=452;DP4=44,42,162,191;FS=0;MQ=60;MQ0F=0;MQSBZ=1.44338;RPBZ=0.213201;SGB=-0.692562;VDB=0.585174;SNP;TV	1/1:255,66,0:22:0:0,9:0,13:0,22	1/1:255,78,0:26:0:0,13:0,13:0,26	1/1:255,69,0:23:0:0,10:0,13:0,23	1/1:255,102,0:34:0:0,18:0,16:0,34	1/1:255,72,0:24:0:0,14:0,10:0,24	0/1:250,0,195:.:.:.:.:.	0/1:255,0,119:.:.:.:.:.	0/1:255,0,141:.:.:.:.:.	0/1:255,0,163:.:.:.:.:.	0/1:255,0,150:.:.:.:.:.	23	27	28	44	40	22	29	27	35	24	CACTIG010000023.1	40691409	40725395	NC_048332.1|8810420|8844842|1|XM_034014071.2|XP_033869962.2|RAS_protein_activator_like_2,_transcript_variant_X5|34423	29775
CACTIG010000023.1	40661757	.	A	G	225.417	SNP	AC=20;AD=12,15;ADF=6,8;ADR=6,7;AN=30;BQBZ=-1.51186;DP=353;DP4=44,32,136,125;FS=0;MQ=60;MQ0F=0;MQBZ=-1;MQSBZ=-1.22474;RPBZ=1.1547;SCBZ=1.0177;SGB=-0.692352;VDB=0.330636;SNP;TS	1/1:255,63,0:21:0:0,12:0,9:0,21	1/1:255,60,0:20:0:0,12:0,8:0,20	1/1:255,51,0:17:0:0,10:0,7:0,17	1/1:255,75,0:25:0:0,15:0,10:0,25	1/1:255,84,0:28:0:0,11:0,17:0,28	0/1:99,0,113:.:.:.:.:.	0/1:255,0,102:.:.:.:.:.	0/1:255,0,188:.:.:.:.:.	0/1:255,0,85:.:.:.:.:.	0/1:255,0,224:.:.:.:.:.	14	27	36	25	31	26	22	20	29	31	CACTIG010000023.1	40691409	40725395	NC_048332.1|8810420|8844842|1|XM_034014071.2|XP_033869962.2|RAS_protein_activator_like_2,_transcript_variant_X5|34423	29652
CACTIG010000023.1	41235361	.	C	T	225.417	SNP	AC=20;AD=22,14;ADF=8,5;ADR=14,9;AN=30;BQBZ=-0.476477;DP=422;DP4=42,68,125,173;FS=0;MQ=60;MQ0F=0;MQBZ=-0.606977;MQSBZ=-0.666667;RPBZ=0.0544138;SCBZ=0.606977;SGB=-0.69312;VDB=0.0840715;SNP;TS	1/1:255,96,0:32:0:0,21:0,11:0,32	1/1:255,45,0:15:0:0,3:0,12:0,15	1/1:255,48,0:16:0:0,8:0,8:0,16	1/1:255,84,0:28:0:0,15:0,13:0,28	1/1:255,60,0:20:0:0,10:0,10:0,20	0/1:225,0,255:.:.:.:.:.	0/1:255,0,55:.:.:.:.:.	0/1:255,0,137:.:.:.:.:.	0/1:255,0,157:.:.:.:.:.	0/1:238,0,255:.:.:.:.:.	29	33	30	32	37	34	17	21	30	22	CACTIG010000023.1	41193572	41220909	NC_048332.1|8315496|8342282|-1|XM_034020794.2|XP_033876685.2|E3_ubiquitin-protein_ligase_COP1-like,_transcript_variant_X2|26787	14452
CACTIG010000023.1	41876925	.	C	G	225.417	SNP	AC=20;AD=13,17;ADF=8,10;ADR=5,7;AN=30;BQBZ=1.19086;DP=418;DP4=48,66,134,155;FS=0;MQ=45;MQ0F=0;MQBZ=-2.70692;MQSBZ=0.500179;RPBZ=1.05827;SCBZ=0.785014;SGB=-0.693097;VDB=0.0565561;SNP;TV	1/1:255,90,0:30:0:0,15:0,15:0,30	1/1:255,66,0:22:0:0,10:0,12:0,22	1/1:255,54,0:18:0:0,6:0,12:0,18	1/1:255,84,0:28:0:0,12:0,16:0,28	1/1:255,57,0:19:0:0,7:0,12:0,19	0/1:255,0,87:.:.:.:.:.	0/1:241,0,94:.:.:.:.:.	0/1:255,0,255:.:.:.:.:.	0/1:255,0,217:.:.:.:.:.	0/1:255,0,235:.:.:.:.:.	22	20	47	29	32	31	24	20	28	20	CACTIG010000023.1	41811539	41897738	NC_048332.1|7642160|7727270|-1|XM_034017148.2|XP_033873039.1|UDP-Gal:betaGlcNAc_beta_1,4-_galactosyltransferase,_polypeptide_2,_transcript_variant_X3|85111	0
CACTIG010000023.1	41876956	.	T	G	225.417	SNP	AC=20;AD=13,10;ADF=8,6;ADR=5,4;AN=30;BQBZ=-0.324102;DP=336;DP4=58,60,86,121;FS=0;MQ=46;MQ0F=0;MQBZ=-2.83077;MQSBZ=-0.305531;RPBZ=0.485428;SCBZ=0.57735;SGB=-0.69168;VDB=0.843627;SNP;TV	1/1:255,57,0:19:0:0,8:0,11:0,19	1/1:255,42,0:14:0:0,5:0,9:0,14	1/1:240,36,0:12:0:0,1:0,11:0,12	1/1:255,54,0:18:0:0,5:0,13:0,18	1/1:255,66,0:22:0:0,11:0,11:0,22	0/1:227,0,82:.:.:.:.:.	0/1:131,0,155:.:.:.:.:.	0/1:255,0,255:.:.:.:.:.	0/1:219,0,217:.:.:.:.:.	0/1:193,0,245:.:.:.:.:.	17	11	50	24	23	19	14	13	19	23	CACTIG010000023.1	41811539	41897738	NC_048332.1|7642160|7727270|-1|XM_034017148.2|XP_033873039.1|UDP-Gal:betaGlcNAc_beta_1,4-_galactosyltransferase,_polypeptide_2,_transcript_variant_X3|85111	0
CACTIG010000023.1	41876983	.	T	C	225.417	SNP	AC=20;AD=18,7;ADF=12,5;ADR=6,2;AN=30;BQBZ=-1.25461;DP=304;DP4=60,66,89,85;FS=0;MQ=56;MQ0F=0;MQBZ=-1.88192;MQSBZ=-1.10018;RPBZ=-0.424264;SCBZ=-0.405111;SGB=-0.690438;VDB=0.403705;SNP;TS	1/1:255,51,0:17:0:0,8:0,9:0,17	1/1:255,48,0:16:0:0,5:0,11:0,16	1/1:219,27,0:9:0:0,2:0,7:0,9	1/1:255,48,0:16:0:0,6:0,10:0,16	1/1:255,72,0:24:0:0,10:0,14:0,24	0/1:217,0,96:.:.:.:.:.	0/1:117,0,123:.:.:.:.:.	0/1:248,0,255:.:.:.:.:.	0/1:154,0,227:.:.:.:.:.	0/1:129,0,255:.:.:.:.:.	16	10	41	22	26	17	16	9	16	25	CACTIG010000023.1	41811539	41897738	NC_048332.1|7642160|7727270|-1|XM_034017148.2|XP_033873039.1|UDP-Gal:betaGlcNAc_beta_1,4-_galactosyltransferase,_polypeptide_2,_transcript_variant_X3|85111	0
CACTIG010000023.1	42308544	.	T	C	225.417	SNP	AC=20;AD=8,24;ADF=2,10;ADR=6,14;AN=30;BQBZ=-0.531381;DP=449;DP4=32,38,174,183;FS=0;MQ=59;MQ0F=0;MQBZ=-0.661438;MQSBZ=0.957427;RPBZ=2.0723;SCBZ=0.57735;SGB=-0.692717;VDB=0.139155;SNP;TS	1/1:255,69,0:23:0:0,12:0,11:0,23	1/1:255,60,0:20:0:0,10:0,10:0,20	1/1:255,84,0:28:0:0,13:0,15:0,28	1/1:255,135,0:45:0:0,24:0,21:0,45	1/1:255,51,0:17:0:0,9:0,8:0,17	0/1:255,0,125:.:.:.:.:.	0/1:255,0,143:.:.:.:.:.	0/1:255,0,65:.:.:.:.:.	0/1:255,0,133:.:.:.:.:.	0/1:255,0,158:.:.:.:.:.	24	32	36	28	34	27	21	30	47	20	CACTIG010000023.1	42235749	42308013	NC_048332.1|7291751|7365099|-1|XM_034022354.2|XP_033878245.2|ERI1_exoribonuclease_3-like,_transcript_variant_X1|73349	531
CACTIG010000023.1	42382316	.	C	CG	228.323	INS	AC=20;AD=11,30;ADF=10,16;ADR=1,14;AN=30;DP=444;DP4=92,53,161,130;FS=0;IDV=18;IMF=0.72;MQ=60;MQ0F=0;RPBZ=-0.181743;SCBZ=-0.321745;SGB=-0.691153;VDB=0.276857;INDEL;INS;TV	1/1:255,3,0:25:4:4,14:3,4:7,18	1/1:255,0,4:31:0:4,19:1,7:5,26	1/1:255,0,3:26:2:3,10:1,12:4,22	1/1:255,1,0:30:0:3,16:2,9:5,25	1/1:255,48,0:16:0:0,8:0,8:0,16	0/1:217,0,118:.:.:.:.:.	0/1:255,0,35:.:.:.:.:.	0/1:204,0,45:.:.:.:.:.	0/1:202,0,62:.:.:.:.:.	0/1:255,0,11:.:.:.:.:.	22	35	22	37	42	25	34	28	30	18	CACTIG010000023.1	42384179	42389722	NC_048332.1|7213943|7217838|-1|XM_034006579.2|XP_033862470.2|selenoprotein_Pb-like|3896	1863
CACTIG010000023.1	42674700	.	g	gA,gAA,gAAA	148.776	INS	AC=16,10,2;AD=0,10,8,5;ADF=0,5,3,0;ADR=0,5,5,5;AN=30;BQBZ=-2.36787;DP=272;DP4=8,5,71,123;FS=0;IDV=12;IMF=0.8;MQ=60;MQ0F=0;RPBZ=-2.6004;SCBZ=-1.21988;SGB=-0.676189;VDB=0.240077;INDEL;INS;TV	1/1:87,23,0,.,.,.,.,.,.,.:12:0:1,1,.,.:0,10,.,.:1,11,.,.	1/1:89,22,0,.,.,.,.,.,.,.:13:0:0,3,.,.:1,7,.,.:1,10,.,.	1/1:84,12,0,.,.,.,.,.,.,.:8:0:1,1,.,.:0,6,.,.:1,7,.,.	1/1:76,13,0,.,.,.,.,.,.,.:17:0:2,6,.,.:2,7,.,.:4,13,.,.	1/1:148,39,0,.,.,.,.,.,.,.:13:0:0,6,.,.:0,7,.,.:0,13,.,.	1/2:162,108,72,96,0,78,.,.,.,.:.:.:.:.:.	1/3:158,79,56,.,.,.,102,0,.,92:.:.:.:.:.	2/1:211,151,121,100,0,82,.,.,.,.:.:.:.:.:.	0/2:68,.,.,0,.,8,.,.,.,.:.:.:.:.:.	2/2:95,.,.,36,.,12,.,.,.,.:.:.:.:.:.	20	24	20	16	18	15	15	13	30	16	CACTIG010000023.1	42674455	42718281	NC_048332.1|6863819|6927958|1|XM_034019472.2|XP_033875363.1|single-stranded_DNA-binding_protein_3|64140	0
CACTIG010000023.1	42849565	.	G	GGT	226.219	INS	AC=20;AD=14,14;ADF=6,7;ADR=8,7;AN=30;DP=491;DP4=66,59,70,70;FS=0;IDV=23;IMF=0.884615;MQ=60;MQ0F=0;MQBZ=-0.353553;MQSBZ=-1.30384;RPBZ=-1.88701;SCBZ=0.766979;SGB=-0.683931;VDB=0.364583;INDEL;INS;TV	1/1:253,21,0:14:0:0,7:1,6:1,13	1/1:159,21,0:7:0:0,5:0,2:0,7	1/1:218,57,0:19:0:0,12:0,7:0,19	1/1:74,12,0:4:0:0,1:0,3:0,4	1/1:167,21,0:7:0:0,5:0,2:0,7	0/1:122,0,60:.:.:.:.:.	0/1:40,0,90:.:.:.:.:.	0/1:56,0,127:.:.:.:.:.	0/1:141,0,116:.:.:.:.:.	0/1:54,0,122:.:.:.:.:.	18	37	46	32	52	27	32	27	24	22	CACTIG010000023.1	42843953	42851516	NC_048332.1|6730012|6737571|-1|XM_034008940.2|XP_033864831.2|LIM/homeobox_protein_Lhx8-like,_transcript_variant_X1|7560	0
CACTIG010000023.1	42849912	.	T	C	228.23	SNP	AC=20;AD=8,16;ADF=3,8;ADR=5,8;AN=30;BQBZ=1.39815;DP=407;DP4=38,39,167,156;FS=0;MQ=60;MQ0F=0;RPBZ=1.47464;SCBZ=0.229416;SGB=-0.693144;VDB=0.409251;SNP;TS	1/1:255,117,0:39:0:0,23:0,16:0,39	1/1:255,69,0:23:0:0,9:0,14:0,23	1/1:255,27,0:20:0:0,9:1,10:1,19	1/1:255,96,0:32:0:0,18:0,14:0,32	1/1:255,90,0:30:0:0,14:0,16:0,30	0/1:255,0,69:.:.:.:.:.	0/1:255,0,213:.:.:.:.:.	0/1:255,0,128:.:.:.:.:.	0/1:255,0,169:.:.:.:.:.	0/1:255,0,189:.:.:.:.:.	20	35	30	22	26	40	24	20	32	31	CACTIG010000023.1	42843953	42851516	NC_048332.1|6730012|6737571|-1|XM_034008940.2|XP_033864831.2|LIM/homeobox_protein_Lhx8-like,_transcript_variant_X1|7560	0
CACTIG010000023.1	42849975	.	T	C	225.417	SNP	AC=20;AD=7,17;ADF=4,7;ADR=3,10;AN=30;BQBZ=0.70881;DP=391;DP4=30,28,148,174;FS=0;MQ=59;MQ0F=0;MQBZ=-0.663469;MQSBZ=-0.912871;RPBZ=0.502949;SCBZ=0.387298;SGB=-0.693127;VDB=0.37489;SNP;TS	1/1:255,99,0:33:0:0,15:0,18:0,33	1/1:255,57,0:19:0:0,12:0,7:0,19	1/1:255,42,0:14:0:0,5:0,9:0,14	1/1:255,111,0:37:0:0,11:0,26:0,37	1/1:255,69,0:23:0:0,9:0,14:0,23	0/1:255,0,35:.:.:.:.:.	0/1:255,0,51:.:.:.:.:.	0/1:255,0,101:.:.:.:.:.	0/1:255,0,163:.:.:.:.:.	0/1:255,0,125:.:.:.:.:.	24	24	30	30	26	33	20	15	38	26	CACTIG010000023.1	42843953	42851516	NC_048332.1|6730012|6737571|-1|XM_034008940.2|XP_033864831.2|LIM/homeobox_protein_Lhx8-like,_transcript_variant_X1|7560	0
CACTIG010000023.1	42849979	.	T	TTGA	228.291	INS	AC=20;AD=6,14;ADF=4,5;ADR=2,9;AN=30;BQBZ=-2.59517;DP=385;DP4=36,32,114,150;FS=0;IDV=27;IMF=0.84375;MQ=59;MQ0F=0;MQBZ=-0.430331;MQSBZ=-0.939336;RPBZ=-3.50582;SCBZ=-4.15543;SGB=-0.693021;VDB=0.0864271;INDEL;INS;TV	1/1:255,81,0:27:0:0,12:0,15:0,27	1/1:255,51,0:17:0:0,10:0,7:0,17	1/1:255,30,0:10:0:0,4:0,6:0,10	1/1:255,45,0:37:0:2,10:4,21:6,31	1/1:255,51,0:17:0:0,6:0,11:0,17	0/1:255,0,48:.:.:.:.:.	0/1:255,0,48:.:.:.:.:.	0/1:255,0,67:.:.:.:.:.	0/1:255,0,142:.:.:.:.:.	0/1:255,0,91:.:.:.:.:.	25	21	30	30	24	32	20	15	42	26	CACTIG010000023.1	42843953	42851516	NC_048332.1|6730012|6737571|-1|XM_034008940.2|XP_033864831.2|LIM/homeobox_protein_Lhx8-like,_transcript_variant_X1|7560	0
CACTIG010000023.1	42850309	.	T	G	225.417	SNP	AC=20;AD=8,15;ADF=4,8;ADR=4,7;AN=30;BQBZ=0.150892;DP=425;DP4=44,63,175,126;FS=0;MQ=42;MQ0F=0;MQBZ=1.03065;MQSBZ=-0.91655;RPBZ=-1.17792;SGB=-0.692976;VDB=0.682454;SNP;TV	1/1:255,78,0:26:0:0,16:0,10:0,26	1/1:255,84,0:28:0:0,16:0,12:0,28	1/1:255,60,0:20:0:0,8:0,12:0,20	1/1:255,75,0:25:0:0,10:0,15:0,25	1/1:255,102,0:34:0:0,21:0,13:0,34	0/1:224,0,175:.:.:.:.:.	0/1:255,0,117:.:.:.:.:.	0/1:160,0,255:.:.:.:.:.	0/1:255,0,28:.:.:.:.:.	0/1:255,0,138:.:.:.:.:.	24	28	36	28	25	28	29	20	25	35	CACTIG010000023.1	42843953	42851516	NC_048332.1|6730012|6737571|-1|XM_034008940.2|XP_033864831.2|LIM/homeobox_protein_Lhx8-like,_transcript_variant_X1|7560	0
CACTIG010000023.1	42853862	.	C	A	225.417	SNP	AC=20;AD=21,17;ADF=13,8;ADR=8,9;AN=30;BQBZ=0.457233;DP=402;DP4=54,34,143,159;FS=0;MQ=60;MQ0F=0;RPBZ=1.70258;SCBZ=-1.80202;SGB=-0.692352;VDB=0.61524;SNP;TV	1/1:255,63,0:21:0:0,9:0,12:0,21	1/1:255,90,0:30:0:0,15:0,15:0,30	1/1:255,60,0:20:0:0,9:0,11:0,20	1/1:255,93,0:31:0:0,12:0,19:0,31	1/1:255,60,0:20:0:0,10:0,10:0,20	0/1:255,0,92:.:.:.:.:.	0/1:255,0,130:.:.:.:.:.	0/1:255,0,159:.:.:.:.:.	0/1:242,0,60:.:.:.:.:.	0/1:249,0,255:.:.:.:.:.	33	27	31	18	40	25	38	25	33	23	CACTIG010000023.1	42853508	42894474	NC_048332.1|6686639|6728045|1|XM_034017391.2|XP_033873282.2|solute_carrier_family_44_member_5b,_transcript_variant_X2|41407	0
CACTIG010000023.1	43163423	.	C	T	225.417	SNP	AC=20;AD=5,18;ADF=1,8;ADR=4,10;AN=30;BQBZ=-0.892035;DP=321;DP4=22,42,76,157;FS=0;MQ=54;MQ0F=0;MQBZ=-2.06761;MQSBZ=-0.458209;RPBZ=1.71464;SCBZ=1.3784;SGB=-0.690438;VDB=0.155724;SNP;TS	1/1:255,51,0:17:0:0,5:0,12:0,17	1/1:255,57,0:19:0:0,11:0,8:0,19	1/1:170,18,0:6:0:0,2:0,4:0,6	1/1:255,78,0:26:0:0,10:0,16:0,26	1/1:255,63,0:21:0:0,6:0,15:0,21	0/1:173,0,224:.:.:.:.:.	0/1:230,0,155:.:.:.:.:.	0/1:255,0,43:.:.:.:.:.	0/1:173,0,179:.:.:.:.:.	0/1:255,0,64:.:.:.:.:.	25	23	27	27	28	21	22	14	31	24	CACTIG010000023.1	43147754	43175402	NC_048332.1|6400447|6428011|1|XM_034020037.2|XP_033875928.1|ubiquitin_carboxyl-terminal_hydrolase_33-like,_transcript_variant_X4|27565	0
CACTIG010000023.1	43169047	.	T	TAATATCCC	228.384	INS	AC=18;AD=10,15;ADF=8,7;ADR=2,8;AN=26;BQBZ=-1.78003;DP=285;DP4=44,24,97,97;FS=0;IDV=20;IMF=1;MQ=59;MQ0F=0;MQBZ=-0.586171;MQSBZ=-0.852803;RPBZ=-0.935981;SCBZ=-2.74643;SGB=-0.69168;VDB=0.00224074;INDEL;INS;TV	1/1:255,57,0:19:0:0,8:0,11:0,19	1/1:255,50,0:25:0:1,10:1,13:2,23	1/1:255,27,0:9:0:0,4:0,5:0,9	1/1:255,35,0:20:0:1,12:1,6:2,18	1/1:255,57,0:19:0:0,9:0,10:0,19	./.:.:.:.:.:.:.	0/1:252,0,156:.:.:.:.:.	0/1:255,0,165:.:.:.:.:.	0/1:255,0,97:.:.:.:.:.	0/1:255,0,161:.:.:.:.:.	18	22	24	21	25	20	32	9	23	20	CACTIG010000023.1	43147754	43175402	NC_048332.1|6400447|6428011|1|XM_034020037.2|XP_033875928.1|ubiquitin_carboxyl-terminal_hydrolase_33-like,_transcript_variant_X4|27565	0
CACTIG010000023.1	43169089	.	T	C	225.417	SNP	AC=20;AD=9,18;ADF=7,6;ADR=2,12;AN=30;BQBZ=0.105865;DP=449;DP4=46,56,139,185;FS=0;MQ=60;MQ0F=0;RPBZ=-0.259766;SCBZ=2.47991;SGB=-0.693097;VDB=0.891518;SNP;TS	1/1:255,90,0:30:0:0,14:0,16:0,30	1/1:255,99,0:33:0:0,17:0,16:0,33	1/1:255,54,0:18:0:0,7:0,11:0,18	1/1:255,81,0:27:0:0,11:0,16:0,27	1/1:255,84,0:28:0:0,14:0,14:0,28	0/1:243,0,255:.:.:.:.:.	0/1:255,0,110:.:.:.:.:.	0/1:255,0,169:.:.:.:.:.	0/1:255,0,217:.:.:.:.:.	0/1:255,0,158:.:.:.:.:.	32	28	32	36	27	31	34	19	28	31	CACTIG010000023.1	43147754	43175402	NC_048332.1|6400447|6428011|1|XM_034020037.2|XP_033875928.1|ubiquitin_carboxyl-terminal_hydrolase_33-like,_transcript_variant_X4|27565	0
CACTIG010000023.1	43173200	.	G	A	225.417	SNP	AC=20;AD=17,13;ADF=12,9;ADR=5,4;AN=30;BQBZ=-0.150494;DP=396;DP4=60,38,173,103;FS=0;MQ=60;MQ0F=0;RPBZ=0.692012;SGB=-0.69168;VDB=0.979035;SNP;TS	1/1:255,57,0:19:0:0,13:0,6:0,19	1/1:255,54,0:18:0:0,12:0,6:0,18	1/1:255,69,0:23:0:0,13:0,10:0,23	1/1:255,90,0:30:0:0,20:0,10:0,30	1/1:255,54,0:18:0:0,13:0,5:0,18	0/1:255,0,253:.:.:.:.:.	0/1:255,0,194:.:.:.:.:.	0/1:250,0,132:.:.:.:.:.	0/1:255,0,70:.:.:.:.:.	0/1:223,0,255:.:.:.:.:.	32	29	21	30	30	20	21	25	33	19	CACTIG010000023.1	43147754	43175402	NC_048332.1|6400447|6428011|1|XM_034020037.2|XP_033875928.1|ubiquitin_carboxyl-terminal_hydrolase_33-like,_transcript_variant_X4|27565	0
CACTIG010000023.1	43349739	.	g	gT	222.365	INS	AC=20;AD=20,11;ADF=12,5;ADR=8,6;AN=30;DP=392;DP4=68,42,130,82;FS=0;IDV=18;IMF=0.642857;MQ=57;MQ0F=0;MQBZ=-1.07344;MQSBZ=-1.49556;RPBZ=-2.71194;SCBZ=-1.82663;SGB=-0.691153;VDB=0.0862143;INDEL;INS;TV	1/1:221,40,0:19:0:0,9:1,9:1,18	1/1:249,56,0:27:3:2,15:0,10:2,25	1/1:207,27,0:19:0:2,8:1,8:3,16	1/1:135,0,1:20:6:2,13:2,3:4,16	1/1:202,45,0:15:0:0,9:0,6:0,15	0/1:137,0,25:.:.:.:.:.	0/1:133,0,49:.:.:.:.:.	0/1:167,0,8:.:.:.:.:.	0/1:95,0,65:.:.:.:.:.	0/1:106,0,83:.:.:.:.:.	19	32	27	22	31	27	31	21	27	16	CACTIG010000023.1	43348554	43352561	NC_048332.1|6229321|6233346|-1|XM_034009488.2|XP_033865379.2|cell_division_cycle_20_homolog|4026	0
CACTIG010000023.1	43478980	.	A	C,T	225.417	SNP	AC=20,2;AD=19,11,7;ADF=3,3,4;ADR=16,8,3;AN=30;BQBZ=-1.51431;DP=350;DP4=28,54,70,173;FS=0;MQ=60;MQ0F=0;RPBZ=-0.673565;SCBZ=0.57735;SGB=-0.692352;VDB=0.497145;SNP;TV	1/1:255,63,0,.,.,.:21:0:0,6,.:0,15,.:0,21,.	1/1:255,66,0,.,.,.:22:0:0,3,.:0,19,.:0,22,.	1/1:255,51,0,.,.,.:17:0:0,7,.:0,10,.:0,17,.	1/1:255,75,0,.,.,.:25:0:0,7,.:0,18,.:0,25,.	1/1:255,66,0,.,.,.:22:0:0,3,.:0,19,.:0,22,.	0/1:219,0,178,.,.,.:.:.:.:.:.	0/1:243,0,124,.,.,.:.:.:.:.:.	0/1:186,0,198,.,.,.:.:.:.:.:.	1/2:255,196,157,242,0,220:.:.:.:.:.	0/1:206,0,238,.,.,.:.:.:.:.:.	23	21	20	23	31	26	22	19	27	23	CACTIG010000023.1	43503405	43514205	NC_048332.1|6057238|6068044|-1|XM_034022861.2|XP_033878752.2|diencephalon/mesencephalon_homeobox_protein_1-A-like|10807	24425
CACTIG010000023.1	43498043	.	A	G	173.416	SNP	AC=18;AD=10,3;ADF=4,3;ADR=6,0;AN=26;BQBZ=0.520563;DP=129;DP4=14,32,72,4;FS=0;MQ=60;MQ0F=0;MQBZ=-0.707107;MQSBZ=-1.18322;RPBZ=-2.76126;SCBZ=2.19311;SGB=-0.616816;VDB=0.000904524;SNP;TS	1/1:134,18,0:6:0:0,6:0,0:0,6	1/1:113,12,0:4:0:0,4:0,0:0,4	1/1:154,24,0:8:0:0,8:0,0:0,8	1/1:203,33,0:11:0:0,11:0,0:0,11	1/1:165,27,0:9:0:0,9:0,0:0,9	0/1:175,0,90:.:.:.:.:.	0/1:60,0,195:.:.:.:.:.	./.:.:.:.:.:.:.	0/1:94,0,13:.:.:.:.:.	0/1:52,0,231:.:.:.:.:.	18	11	22	11	18	9	7	12	25	16	CACTIG010000023.1	43503405	43514205	NC_048332.1|6057238|6068044|-1|XM_034022861.2|XP_033878752.2|diencephalon/mesencephalon_homeobox_protein_1-A-like|10807	5362
CACTIG010000023.1	43535185	.	C	CTTTACTTGT	225.417	INS	AC=20;AD=4,8;ADF=1,5;ADR=3,3;AN=30;BQBZ=-1.60164;DP=317;DP4=26,38,89,58;FS=0;IDV=17;IMF=0.772727;MQ=60;MQ0F=0;MQBZ=-0.679366;MQSBZ=0.852803;RPBZ=-1.99895;SCBZ=-2.03443;SGB=-0.688148;VDB=0.00340379;INDEL;INS;TV	1/1:255,45,0:15:0:0,8:0,7:0,15	1/1:255,33,0:11:0:0,7:0,4:0,11	1/1:255,39,0:13:0:0,8:0,5:0,13	1/1:255,24,0:8:0:0,4:0,4:0,8	1/1:255,42,0:14:0:0,10:0,4:0,14	0/1:105,0,143:.:.:.:.:.	0/1:223,0,104:.:.:.:.:.	0/1:255,0,143:.:.:.:.:.	0/1:241,0,205:.:.:.:.:.	0/1:255,0,97:.:.:.:.:.	11	25	33	29	20	22	14	21	13	19	CACTIG010000023.1	43535517	43540921	NC_048332.1|6029366|6034780|1|XM_034001660.2|XP_033857551.2|PIF1_5'-to-3'_DNA_helicase_homolog_(S._cerevisiae)|5415	332
CACTIG010000023.1	43896348	.	G	T	228.122	SNP	AC=20;AD=5,21;ADF=0,11;ADR=5,10;AN=30;BQBZ=-1.20579;DP=397;DP4=23,37,152,168;FS=0;MQ=60;MQ0F=0;MQBZ=2.38048;MQSBZ=0.816497;RPBZ=0.172175;SCBZ=-1.5037;SGB=-0.692352;VDB=0.598668;SNP;TV	1/1:255,63,0:21:0:0,8:0,13:0,21	1/1:255,81,0:27:0:0,16:0,11:0,27	1/1:255,60,0:20:0:0,9:0,11:0,20	1/1:255,87,0:29:0:0,11:0,18:0,29	1/1:255,12,0:29:0:1,14:1,13:2,27	0/1:255,0,42:.:.:.:.:.	0/1:255,0,32:.:.:.:.:.	0/1:255,0,233:.:.:.:.:.	0/1:255,0,43:.:.:.:.:.	0/1:255,0,62:.:.:.:.:.	22	28	33	22	27	23	31	20	33	31	CACTIG010000023.1	43729123	43897776	NC_048332.1|5673940|5842659|1|XM_034013572.2|XP_033869463.1|receptor-type_tyrosine-protein_phosphatase_F-like,_transcript_variant_X13|168720	0
CACTIG010000023.1	45441402	.	C	T	228.41	SNP	AC=20;AD=10,12;ADF=6,7;ADR=4,5;AN=30;BQBZ=-0.445132;DP=338;DP4=25,34,155,116;FS=0;MQ=50;MQ0F=0;MQBZ=1.73519;MQSBZ=-1.22934;RPBZ=-1.22981;SCBZ=0.229416;SGB=-0.692717;VDB=0.72642;SNP;TS	1/1:255,56,0:24:0:0,12:1,11:1,23	1/1:255,60,0:20:0:0,10:0,10:0,20	1/1:255,73,0:29:0:1,14:0,14:1,28	1/1:255,75,0:25:0:0,15:0,10:0,25	1/1:255,27,0:20:0:0,12:1,7:1,19	0/1:212,0,80:.:.:.:.:.	0/1:239,0,103:.:.:.:.:.	0/1:255,0,54:.:.:.:.:.	0/1:255,0,17:.:.:.:.:.	0/1:230,0,178:.:.:.:.:.	14	29	29	18	22	24	21	29	26	21	CACTIG010000023.1	45432083	45445321	NC_048332.1|4119370|4132661|1|XM_034924150.1|XP_034780041.1|LIM_domain_transcription_factor_LMO4-like,_transcript_variant_X2|13292	0
CACTIG010000023.1	45441409	.	G	T	228.411	SNP	AC=20;AD=10,13;ADF=6,8;ADR=4,5;AN=30;BQBZ=-0.189143;DP=344;DP4=23,36,150,124;FS=0;MQ=54;MQ0F=0;MQBZ=1.96838;MQSBZ=-1.25898;RPBZ=-1.65413;SCBZ=0.229416;SGB=-0.692067;VDB=0.0421058;SNP;TV	1/1:255,47,0:21:0:0,10:1,10:1,20	1/1:255,66,0:22:0:0,11:0,11:0,22	1/1:255,76,0:30:0:1,14:0,15:1,29	1/1:255,84,0:28:0:0,17:0,11:0,28	1/1:255,27,0:20:0:0,12:1,7:1,19	0/1:225,0,106:.:.:.:.:.	0/1:255,0,97:.:.:.:.:.	0/1:255,0,76:.:.:.:.:.	0/1:255,0,19:.:.:.:.:.	0/1:238,0,180:.:.:.:.:.	16	29	28	17	23	22	23	30	30	21	CACTIG010000023.1	45432083	45445321	NC_048332.1|4119370|4132661|1|XM_034924150.1|XP_034780041.1|LIM_domain_transcription_factor_LMO4-like,_transcript_variant_X2|13292	0
CACTIG010000023.1	45625648	.	gta	g	225.417	DEL	AC=20;AD=15,11;ADF=8,5;ADR=7,6;AN=30;DP=353;DP4=72,52,116,82;FS=0;IDV=11;IMF=0.733333;MQ=42;MQ0F=0;MQBZ=-2.95804;MQSBZ=-1.25746;RPBZ=-2.87228;SCBZ=-0.894427;SGB=-0.680642;VDB=0.274834;DEL;INDEL;TV	1/1:255,36,0:12:0:0,6:0,6:0,12	1/1:255,69,0:23:0:0,8:0,15:0,23	1/1:255,48,0:16:0:0,13:0,3:0,16	1/1:255,48,0:16:0:0,13:0,3:0,16	1/1:255,45,0:15:0:0,12:0,3:0,15	0/1:214,0,140:.:.:.:.:.	0/1:255,0,66:.:.:.:.:.	0/1:143,0,159:.:.:.:.:.	0/1:251,0,142:.:.:.:.:.	0/1:234,0,156:.:.:.:.:.	27	29	24	26	27	15	28	18	18	21	CACTIG010000023.1	45616828	45629684	NC_048332.1|3934427|3947350|1|XM_034007403.2|XP_033863294.2|SCL-interrupting_locus_protein_homolog|12924	0
CACTIG010000023.1	45758053	.	T	C	228.217	SNP	AC=20;AD=10,13;ADF=5,7;ADR=5,6;AN=30;BQBZ=-1.47308;DP=335;DP4=48,25,113,136;FS=0;MQ=60;MQ0F=0;RPBZ=-1.65597;SCBZ=-1.1726;SGB=-0.692717;VDB=0.231533;SNP;TS	1/1:255,69,0:23:0:0,11:0,12:0,23	1/1:255,57,0:19:0:0,6:0,13:0,19	1/1:255,72,0:24:0:0,14:0,10:0,24	1/1:255,28,0:22:0:0,11:1,10:1,21	1/1:255,48,0:16:0:0,9:0,7:0,16	0/1:226,0,111:.:.:.:.:.	0/1:200,0,165:.:.:.:.:.	0/1:255,0,177:.:.:.:.:.	0/1:255,0,42:.:.:.:.:.	0/1:238,0,205:.:.:.:.:.	19	20	32	23	25	24	21	25	25	19	CACTIG010000023.1	45687936	45803279	NC_048332.1|3759858|3875656|1|XM_034924324.1|XP_034780215.1|cytosolic_carboxypeptidase_6-like|115799	0
CACTIG010000023.1	45940736	.	A	G	225.417	SNP	AC=20;AD=5,17;ADF=3,15;ADR=2,2;AN=30;BQBZ=-0.236905;DP=362;DP4=32,18,198,93;FS=0;MQ=59;MQ0F=0;MQBZ=0.492366;MQSBZ=-1.32288;RPBZ=-0.737459;SCBZ=-2.44949;SGB=-0.693127;VDB=0.611208;SNP;TS	1/1:255,99,0:33:0:0,21:0,12:0,33	1/1:255,54,0:18:0:0,11:0,7:0,18	1/1:255,57,0:19:0:0,7:0,12:0,19	1/1:255,69,0:23:0:0,12:0,11:0,23	1/1:255,96,0:32:0:0,21:0,11:0,32	0/1:246,0,115:.:.:.:.:.	0/1:255,0,212:.:.:.:.:.	0/1:255,0,31:.:.:.:.:.	0/1:190,0,35:.:.:.:.:.	0/1:214,0,95:.:.:.:.:.	22	39	28	28	26	37	27	29	26	42	CACTIG010000023.1	45937761	45987837	NC_048332.1|3574063|3624584|-1|XM_034019964.2|XP_033875855.1|ELAV_like_neuron-specific_RNA_binding_protein_4,_transcript_variant_X6|50522	0
CACTIG010000023.1	45941909	.	G	A	197.416	SNP	AC=18;AD=4,4;ADF=2,1;ADR=2,3;AN=26;BQBZ=0.353553;DP=105;DP4=10,18,30,37;FS=0;MQ=60;MQ0F=0;RPBZ=0;SCBZ=0.755929;SGB=-0.616816;VDB=0.143887;SNP;TS	1/1:149,18,0:6:0:0,2:0,4:0,6	1/1:173,21,0:7:0:0,2:0,5:0,7	1/1:227,27,0:9:0:0,4:0,5:0,9	1/1:108,12,0:4:0:0,3:0,1:0,4	1/1:146,15,0:5:0:0,3:0,2:0,5	./.:.:.:.:.:.:.	0/1:52,0,97:.:.:.:.:.	0/1:91,0,50:.:.:.:.:.	0/1:156,0,97:.:.:.:.:.	0/1:98,0,108:.:.:.:.:.	5	9	9	13	10	7	12	13	5	9	CACTIG010000023.1	45937761	45987837	NC_048332.1|3574063|3624584|-1|XM_034019964.2|XP_033875855.1|ELAV_like_neuron-specific_RNA_binding_protein_4,_transcript_variant_X6|50522	0
CACTIG010000023.1	45948919	.	A	G	225.417	SNP	AC=20;AD=6,9;ADF=3,4;ADR=3,5;AN=30;BQBZ=-0.762419;DP=415;DP4=32,46,157,160;FS=0;MQ=60;MQ0F=0;RPBZ=0.374661;SGB=-0.693079;VDB=0.812772;SNP;TS	1/1:255,87,0:29:0:0,12:0,17:0,29	1/1:255,99,0:33:0:0,15:0,18:0,33	1/1:255,54,0:18:0:0,10:0,8:0,18	1/1:255,75,0:25:0:0,11:0,14:0,25	1/1:255,72,0:24:0:0,9:0,15:0,24	0/1:255,0,105:.:.:.:.:.	0/1:255,0,118:.:.:.:.:.	0/1:255,0,117:.:.:.:.:.	0/1:255,0,255:.:.:.:.:.	0/1:192,0,143:.:.:.:.:.	29	34	28	37	17	31	36	19	31	25	CACTIG010000023.1	45937761	45987837	NC_048332.1|3574063|3624584|-1|XM_034019964.2|XP_033875855.1|ELAV_like_neuron-specific_RNA_binding_protein_4,_transcript_variant_X6|50522	0
CACTIG010000023.1	46541453	.	C	A	228.403	SNP	AC=20;AD=12,30;ADF=0,11;ADR=12,19;AN=30;BQBZ=-0.501795;DP=404;DP4=0,64,101,235;FS=0;MQ=49;MQ0F=0;MQBZ=2.37634;MQSBZ=-0.0815918;RPBZ=-0.0805792;SCBZ=0.700162;SGB=-0.693079;VDB=0.276057;SNP;TV	1/1:255,61,0:31:3:0,13:2,16:2,29	1/1:255,16,0:24:3:0,9:2,13:2,22	1/1:255,4,0:17:0:0,5:2,10:2,15	1/1:255,50,0:21:0:0,5:1,15:1,20	1/1:255,30,0:19:0:0,5:1,13:1,18	0/1:255,0,15:.:.:.:.:.	0/1:238,0,14:.:.:.:.:.	0/1:255,0,12:.:.:.:.:.	0/1:255,0,15:.:.:.:.:.	0/1:255,0,76:.:.:.:.:.	25	23	27	27	43	34	25	18	21	20	CACTIG010000023.1	46467391	46554432	NC_048332.1|3003662|3092875|1|XM_034010890.2|XP_033866781.1|cAMP-specific_3',5'-cyclic_phosphodiesterase_4B-like,_transcript_variant_X2|89214	0
CACTIG010000023.1	46541455	.	G	A	228.402	SNP	AC=20;AD=11,29;ADF=0,11;ADR=11,18;AN=30;BQBZ=-1.1919;DP=401;DP4=0,62,101,235;FS=0;MQ=49;MQ0F=0;MQBZ=2.37634;MQSBZ=-0.0815918;RPBZ=-0.0805792;SCBZ=0.699716;SGB=-0.693079;VDB=0.276057;SNP;TS	1/1:255,61,0:31:3:0,13:2,16:2,29	1/1:255,12,0:24:3:0,9:2,13:2,22	1/1:255,4,0:17:0:0,5:2,10:2,15	1/1:255,50,0:21:0:0,5:1,15:1,20	1/1:255,30,0:19:0:0,5:1,13:1,18	0/1:255,0,16:.:.:.:.:.	0/1:238,0,12:.:.:.:.:.	0/1:255,0,12:.:.:.:.:.	0/1:255,0,15:.:.:.:.:.	0/1:255,0,74:.:.:.:.:.	25	23	27	27	42	34	25	18	21	19	CACTIG010000023.1	46467391	46554432	NC_048332.1|3003662|3092875|1|XM_034010890.2|XP_033866781.1|cAMP-specific_3',5'-cyclic_phosphodiesterase_4B-like,_transcript_variant_X2|89214	0
CACTIG010000023.1	47023921	.	G	A	225.417	SNP	AC=20;AD=6,17;ADF=4,8;ADR=2,9;AN=30;BQBZ=-0.691471;DP=357;DP4=40,29,129,153;FS=0;MQ=40;MQ0F=0;MQBZ=-0.826929;MQSBZ=0.44072;RPBZ=0.0946549;SCBZ=-1.24722;SGB=-0.689466;VDB=0.992597;SNP;TS	1/1:255,48,0:16:0:0,6:0,10:0,16	1/1:255,66,0:22:0:0,12:0,10:0,22	1/1:255,72,0:24:0:0,10:0,14:0,24	1/1:255,66,0:22:0:0,9:0,13:0,22	1/1:255,63,0:21:0:0,11:0,10:0,21	0/1:181,0,156:.:.:.:.:.	0/1:222,0,29:.:.:.:.:.	0/1:255,0,92:.:.:.:.:.	0/1:147,0,72:.:.:.:.:.	0/1:221,0,101:.:.:.:.:.	23	26	32	16	24	16	22	24	22	21	CACTIG010000023.1	47016886	47056395	NC_048332.1|2464688|2507636|-1|XM_034924379.1|XP_034780270.1|importin-13-like|42949	0
CACTIG010000023.1	47024118	.	C	T	225.417	SNP	AC=20;AD=7,18;ADF=3,8;ADR=4,10;AN=30;BQBZ=0.985013;DP=375;DP4=56,40,125,149;FS=0;MQ=51;MQ0F=0;MQBZ=0.540592;MQSBZ=-0.852905;RPBZ=0.181774;SCBZ=0.641689;SGB=-0.692352;VDB=0.993059;SNP;TS	1/1:255,63,0:21:0:0,12:0,9:0,21	1/1:255,48,0:16:0:0,6:0,10:0,16	1/1:255,48,0:16:0:0,6:0,10:0,16	1/1:255,111,0:37:0:0,12:0,25:0,37	1/1:255,81,0:27:0:0,15:0,12:0,27	0/1:233,0,179:.:.:.:.:.	0/1:255,0,130:.:.:.:.:.	0/1:255,0,255:.:.:.:.:.	0/1:220,0,152:.:.:.:.:.	0/1:255,0,123:.:.:.:.:.	25	23	35	18	25	23	17	18	39	27	CACTIG010000023.1	47016886	47056395	NC_048332.1|2464688|2507636|-1|XM_034924379.1|XP_034780270.1|importin-13-like|42949	0
CACTIG010000023.1	47024230	.	T	C	225.417	SNP	AC=20;AD=10,16;ADF=7,3;ADR=3,13;AN=30;BQBZ=-1.27355;DP=387;DP4=30,58,136,150;FS=0;MQ=59;MQ0F=0;MQBZ=-0.5;MQSBZ=1.20185;RPBZ=-0.441504;SCBZ=1.20185;SGB=-0.692562;VDB=0.459449;SNP;TS	1/1:255,66,0:22:0:0,9:0,13:0,22	1/1:255,51,0:17:0:0,13:0,4:0,17	1/1:255,63,0:21:0:0,12:0,9:0,21	1/1:255,69,0:23:0:0,14:0,9:0,23	1/1:255,72,0:24:0:0,11:0,13:0,24	0/1:236,0,194:.:.:.:.:.	0/1:255,0,64:.:.:.:.:.	0/1:255,0,88:.:.:.:.:.	0/1:255,0,234:.:.:.:.:.	0/1:239,0,176:.:.:.:.:.	24	31	27	30	26	25	18	21	25	26	CACTIG010000023.1	47016886	47056395	NC_048332.1|2464688|2507636|-1|XM_034924379.1|XP_034780270.1|importin-13-like|42949	0
CACTIG010000023.1	47024492	.	T	C	225.417	SNP	AC=20;AD=3,27;ADF=2,15;ADR=1,12;AN=30;BQBZ=0;DP=405;DP4=30,32,174,148;FS=0;MQ=60;MQ0F=0;MQBZ=-0.516398;MQSBZ=0.738549;RPBZ=-0.400351;SCBZ=0.67082;SGB=-0.688148;VDB=0.051161;SNP;TS	1/1:255,45,0:15:0:0,6:0,9:0,15	1/1:255,96,0:32:0:0,19:0,13:0,32	1/1:255,42,0:14:0:0,6:0,8:0,14	1/1:255,102,0:34:0:0,22:0,12:0,34	1/1:255,63,0:21:0:0,9:0,12:0,21	0/1:255,0,78:.:.:.:.:.	0/1:255,0,160:.:.:.:.:.	0/1:255,0,126:.:.:.:.:.	0/1:255,0,158:.:.:.:.:.	0/1:255,0,16:.:.:.:.:.	21	38	21	31	30	15	39	17	36	22	CACTIG010000023.1	47016886	47056395	NC_048332.1|2464688|2507636|-1|XM_034924379.1|XP_034780270.1|importin-13-like|42949	0
CACTIG010000023.1	47024575	.	T	G	225.417	SNP	AC=20;AD=8,28;ADF=4,14;ADR=4,14;AN=30;BQBZ=-0.916061;DP=491;DP4=50,36,207,178;FS=0;MQ=60;MQ0F=0;MQBZ=-0.650444;MQSBZ=0.78019;RPBZ=0.847971;SCBZ=0.867382;SGB=-0.693054;VDB=0.106614;SNP;TV	1/1:255,84,0:28:0:0,15:0,13:0,28	1/1:255,111,0:37:0:0,10:0,27:0,37	1/1:255,66,0:22:0:0,14:0,8:0,22	1/1:255,135,0:45:0:0,22:0,23:0,45	1/1:255,63,0:21:0:0,12:0,9:0,21	0/1:255,0,138:.:.:.:.:.	0/1:255,0,184:.:.:.:.:.	0/1:255,0,164:.:.:.:.:.	0/1:255,0,128:.:.:.:.:.	0/1:255,0,134:.:.:.:.:.	27	40	32	35	38	32	37	24	45	24	CACTIG010000023.1	47016886	47056395	NC_048332.1|2464688|2507636|-1|XM_034924379.1|XP_034780270.1|importin-13-like|42949	0
CACTIG010000023.1	47024656	.	T	C	225.417	SNP	AC=20;AD=7,22;ADF=4,14;ADR=3,8;AN=30;BQBZ=-0.695746;DP=441;DP4=50,44,185,144;FS=0;MQ=54;MQ0F=0;MQBZ=-0.632456;MQSBZ=1.11837;RPBZ=-0.779258;SCBZ=0.808608;SGB=-0.692067;VDB=0.282447;SNP;TS	1/1:255,60,0:20:0:0,10:0,10:0,20	1/1:255,42,0:14:0:0,9:0,5:0,14	1/1:255,87,0:29:0:0,18:0,11:0,29	1/1:255,108,0:36:0:0,14:0,22:0,36	1/1:255,66,0:22:0:0,10:0,12:0,22	0/1:255,0,128:.:.:.:.:.	0/1:255,0,239:.:.:.:.:.	0/1:255,0,171:.:.:.:.:.	0/1:255,0,137:.:.:.:.:.	0/1:255,0,117:.:.:.:.:.	23	46	30	31	35	21	15	30	39	25	CACTIG010000023.1	47016886	47056395	NC_048332.1|2464688|2507636|-1|XM_034924379.1|XP_034780270.1|importin-13-like|42949	0
CACTIG010000023.1	47024657	.	G	A	225.422	SNP	AC=20;AD=7,22;ADF=4,14;ADR=3,8;AN=30;BQBZ=-0.840087;DP=442;DP4=50,44,185,147;FS=0;MQ=54;MQ0F=0;MQBZ=-0.654654;MQSBZ=0.971008;RPBZ=-1.07343;SCBZ=0.793492;SGB=-0.692352;VDB=0.391069;SNP;TS	1/1:255,63,0:21:0:0,11:0,10:0,21	1/1:255,45,0:15:0:0,9:0,6:0,15	1/1:255,87,0:29:0:0,18:0,11:0,29	1/1:255,102,0:35:0:0,13:0,21:0,34	1/1:255,66,0:22:0:0,10:0,12:0,22	0/1:255,0,129:.:.:.:.:.	0/1:255,0,248:.:.:.:.:.	0/1:255,0,170:.:.:.:.:.	0/1:255,0,128:.:.:.:.:.	0/1:255,0,129:.:.:.:.:.	23	46	30	31	35	21	15	30	39	25	CACTIG010000023.1	47016886	47056395	NC_048332.1|2464688|2507636|-1|XM_034924379.1|XP_034780270.1|importin-13-like|42949	0
CACTIG010000023.1	47024914	.	C	CT	228.407	INS	AC=20;AD=10,11;ADF=5,8;ADR=5,3;AN=30;DP=436;DP4=49,34,154,131;FS=0;IDV=18;IMF=1;MQ=59;MQ0F=0;MQBZ=-0.534548;MQSBZ=0.0808452;RPBZ=-1.67891;SCBZ=-3.2695;SGB=-0.689466;VDB=7.62389e-05;INDEL;INS;TV	1/1:255,48,0:16:0:0,8:0,8:0,16	1/1:255,87,0:29:0:0,20:0,9:0,29	1/1:255,84,0:28:0:0,16:0,12:0,28	1/1:255,102,0:34:0:0,18:0,16:0,34	1/1:255,67,0:27:0:1,14:0,12:1,26	0/1:231,0,13:.:.:.:.:.	0/1:214,0,83:.:.:.:.:.	0/1:222,0,39:.:.:.:.:.	0/1:255,0,44:.:.:.:.:.	0/1:203,0,95:.:.:.:.:.	30	25	28	32	31	19	31	36	38	32	CACTIG010000023.1	47016886	47056395	NC_048332.1|2464688|2507636|-1|XM_034924379.1|XP_034780270.1|importin-13-like|42949	0
CACTIG010000023.1	47024923	.	G	C	225.417	SNP	AC=20;AD=12,18;ADF=5,15;ADR=7,3;AN=30;BQBZ=0.26977;DP=443;DP4=48,36,188,143;FS=0;MQ=55;MQ0F=0;MQBZ=-1.99141;MQSBZ=1.53497;RPBZ=-1.7916;SCBZ=0.703732;SGB=-0.692562;VDB=0.0745614;SNP;TV	1/1:255,66,0:22:0:0,13:0,9:0,22	1/1:255,96,0:32:0:0,22:0,10:0,32	1/1:255,87,0:29:0:0,16:0,13:0,29	1/1:255,96,0:32:0:0,17:0,15:0,32	1/1:255,87,0:29:0:0,16:0,13:0,29	0/1:255,0,101:.:.:.:.:.	0/1:226,0,179:.:.:.:.:.	0/1:255,0,149:.:.:.:.:.	0/1:255,0,119:.:.:.:.:.	0/1:225,0,201:.:.:.:.:.	29	22	28	36	30	26	34	34	37	34	CACTIG010000023.1	47016886	47056395	NC_048332.1|2464688|2507636|-1|XM_034924379.1|XP_034780270.1|importin-13-like|42949	0
CACTIG010000023.1	47025113	.	T	G	225.417	SNP	AC=20;AD=4,23;ADF=0,9;ADR=4,14;AN=30;BQBZ=-0.340611;DP=375;DP4=26,32,127,171;FS=0;MQ=39;MQ0F=0;MQBZ=-1.97901;MQSBZ=2.50924;RPBZ=1.72472;SCBZ=-3.58138;SGB=-0.69311;VDB=0.152237;SNP;TV	1/1:255,93,0:31:0:0,10:0,21:0,31	1/1:255,75,0:25:0:0,5:0,20:0,25	1/1:255,81,0:27:0:0,16:0,11:0,27	1/1:255,102,0:34:0:0,17:0,17:0,34	1/1:255,57,0:19:0:0,9:0,10:0,19	0/1:165,0,39:.:.:.:.:.	0/1:219,0,193:.:.:.:.:.	0/1:255,0,111:.:.:.:.:.	0/1:255,0,88:.:.:.:.:.	0/1:255,0,9:.:.:.:.:.	15	22	25	29	27	33	25	29	36	22	CACTIG010000023.1	47016886	47056395	NC_048332.1|2464688|2507636|-1|XM_034924379.1|XP_034780270.1|importin-13-like|42949	0
CACTIG010000023.1	47025143	.	C	A	225.421	SNP	AC=20;AD=6,23;ADF=1,13;ADR=5,10;AN=30;BQBZ=-1.22274;DP=397;DP4=22,42,156,160;FS=0;MQ=37;MQ0F=0;MQBZ=-3.01859;MQSBZ=1.33894;RPBZ=0.802114;SCBZ=-3.22031;SGB=-0.693132;VDB=0.413163;SNP;TV	1/1:255,102,0:34:0:0,11:0,23:0,34	1/1:255,54,0:19:0:0,6:0,12:0,18	1/1:255,72,0:24:0:0,16:0,8:0,24	1/1:255,96,0:32:0:0,20:0,12:0,32	1/1:255,75,0:25:0:0,16:0,9:0,25	0/1:218,0,88:.:.:.:.:.	0/1:255,0,134:.:.:.:.:.	0/1:255,0,98:.:.:.:.:.	0/1:255,0,121:.:.:.:.:.	0/1:255,0,60:.:.:.:.:.	22	22	26	30	30	36	20	26	34	26	CACTIG010000023.1	47016886	47056395	NC_048332.1|2464688|2507636|-1|XM_034924379.1|XP_034780270.1|importin-13-like|42949	0
CACTIG010000023.1	47025162	.	A	G	225.417	SNP	AC=20;AD=6,28;ADF=3,17;ADR=3,11;AN=30;BQBZ=-0.670337;DP=415;DP4=34,42,191,138;FS=0;MQ=37;MQ0F=0;MQBZ=-3.32621;MQSBZ=0.621826;RPBZ=-0.0875178;SCBZ=1.24955;SGB=-0.693132;VDB=0.521437;SNP;TS	1/1:255,102,0:34:0:0,12:0,22:0,34	1/1:255,60,0:20:0:0,14:0,6:0,20	1/1:255,75,0:25:0:0,14:0,11:0,25	1/1:255,87,0:29:0:0,19:0,10:0,29	1/1:255,63,0:21:0:0,16:0,5:0,21	0/1:245,0,117:.:.:.:.:.	0/1:254,0,143:.:.:.:.:.	0/1:228,0,164:.:.:.:.:.	0/1:255,0,168:.:.:.:.:.	0/1:255,0,81:.:.:.:.:.	22	25	25	37	34	35	20	26	30	21	CACTIG010000023.1	47016886	47056395	NC_048332.1|2464688|2507636|-1|XM_034924379.1|XP_034780270.1|importin-13-like|42949	0
CACTIG010000023.1	47025336	.	A	G	220.417	SNP	AC=20;AD=14,7;ADF=5,4;ADR=9,3;AN=30;BQBZ=0.296056;DP=411;DP4=56,50,67,60;FS=0;MQ=57;MQ0F=0;MQBZ=0.28813;MQSBZ=-0.654654;RPBZ=-2.54558;SCBZ=0.852803;SGB=-0.670168;VDB=3.42706e-05;SNP;TS	1/1:242,30,0:10:0:0,3:0,7:0,10	1/1:205,30,0:10:0:0,6:0,4:0,10	1/1:129,18,0:6:0:0,5:0,1:0,6	1/1:134,21,0:7:0:0,5:0,2:0,7	1/1:250,30,0:10:0:0,4:0,6:0,10	0/1:103,0,22:.:.:.:.:.	0/1:157,0,151:.:.:.:.:.	0/1:141,0,189:.:.:.:.:.	0/1:119,0,255:.:.:.:.:.	0/1:79,0,244:.:.:.:.:.	23	32	36	49	46	28	27	31	30	21	CACTIG010000023.1	47016886	47056395	NC_048332.1|2464688|2507636|-1|XM_034924379.1|XP_034780270.1|importin-13-like|42949	0
CACTIG010000023.1	47025474	.	T	A	225.417	SNP	AC=20;AD=6,13;ADF=1,2;ADR=5,11;AN=30;BQBZ=0.296174;DP=240;DP4=19,39,54,122;FS=0;MQ=37;MQ0F=0;MQBZ=0.57735;MQSBZ=1.52535;RPBZ=1.73205;SCBZ=-1.22474;SGB=-0.683931;VDB=0.000378321;SNP;TV	1/1:235,39,0:13:0:0,6:0,7:0,13	1/1:185,30,0:10:0:0,1:0,9:0,10	1/1:255,51,0:17:0:0,5:0,12:0,17	1/1:255,54,0:18:0:0,5:0,13:0,18	1/1:246,48,0:16:0:0,3:0,13:0,16	0/1:69,0,22:.:.:.:.:.	0/1:110,0,107:.:.:.:.:.	0/1:220,0,62:.:.:.:.:.	0/1:216,0,163:.:.:.:.:.	0/1:146,0,85:.:.:.:.:.	5	14	19	23	19	14	10	19	18	18	CACTIG010000023.1	47016886	47056395	NC_048332.1|2464688|2507636|-1|XM_034924379.1|XP_034780270.1|importin-13-like|42949	0
CACTIG010000023.1	47025475	.	A	G	225.417	SNP	AC=20;AD=6,13;ADF=1,2;ADR=5,11;AN=30;BQBZ=-1.82574;DP=238;DP4=19,39,54,122;FS=0;MQ=37;MQ0F=0;MQBZ=0.57735;MQSBZ=1.52535;RPBZ=1.73205;SCBZ=-1.22474;SGB=-0.683931;VDB=0.000378321;SNP;TS	1/1:235,39,0:13:0:0,6:0,7:0,13	1/1:183,30,0:10:0:0,1:0,9:0,10	1/1:255,51,0:17:0:0,5:0,12:0,17	1/1:255,54,0:18:0:0,5:0,13:0,18	1/1:250,48,0:16:0:0,3:0,13:0,16	0/1:69,0,22:.:.:.:.:.	0/1:111,0,107:.:.:.:.:.	0/1:224,0,63:.:.:.:.:.	0/1:220,0,164:.:.:.:.:.	0/1:143,0,84:.:.:.:.:.	5	14	19	23	19	14	10	19	18	18	CACTIG010000023.1	47016886	47056395	NC_048332.1|2464688|2507636|-1|XM_034924379.1|XP_034780270.1|importin-13-like|42949	0
CACTIG010000023.1	47025476	.	T	G	225.417	SNP	AC=20;AD=6,13;ADF=1,2;ADR=5,11;AN=30;BQBZ=0.885615;DP=242;DP4=23,39,54,122;FS=0;MQ=37;MQ0F=0;MQBZ=0.654654;MQSBZ=1.52535;RPBZ=1.96396;SCBZ=-1;SGB=-0.683931;VDB=0.000406845;SNP;TV	1/1:233,39,0:13:0:0,6:0,7:0,13	1/1:175,30,0:10:0:0,1:0,9:0,10	1/1:255,51,0:17:0:0,5:0,12:0,17	1/1:255,54,0:18:0:0,5:0,13:0,18	1/1:249,48,0:16:0:0,3:0,13:0,16	0/1:62,0,34:.:.:.:.:.	0/1:111,0,106:.:.:.:.:.	0/1:222,0,59:.:.:.:.:.	0/1:222,0,165:.:.:.:.:.	0/1:144,0,89:.:.:.:.:.	5	14	19	23	19	13	10	19	18	17	CACTIG010000023.1	47016886	47056395	NC_048332.1|2464688|2507636|-1|XM_034924379.1|XP_034780270.1|importin-13-like|42949	0
CACTIG010000023.1	47399571	.	A	G	225.417	SNP	AC=20;AD=5,27;ADF=4,12;ADR=1,15;AN=30;BQBZ=-0.391717;DP=429;DP4=42,28,157,189;FS=0;MQ=34;MQ0F=0;MQBZ=-4.78611;MQSBZ=-0.20353;RPBZ=-0.129772;SCBZ=0.408248;SGB=-0.69168;VDB=0.0587666;SNP;TS	1/1:255,57,0:19:0:0,3:0,16:0,19	1/1:255,72,0:24:0:0,13:0,11:0,24	1/1:255,51,0:17:0:0,8:0,9:0,17	1/1:255,87,0:29:0:0,11:0,18:0,29	1/1:255,57,0:19:0:0,9:0,10:0,19	0/1:255,0,212:.:.:.:.:.	0/1:255,0,50:.:.:.:.:.	0/1:255,0,184:.:.:.:.:.	0/1:255,0,103:.:.:.:.:.	0/1:255,0,60:.:.:.:.:.	26	27	32	43	33	19	25	17	30	19	CACTIG010000023.1	47388386	47451105	NC_048332.1|2059944|2123721|1|XM_034924279.1|XP_034780170.1|disabled_homolog_1-like,_transcript_variant_X3|63778	0
CACTIG010000023.1	47399596	.	T	C	225.417	SNP	AC=20;AD=6,25;ADF=4,11;ADR=2,14;AN=30;BQBZ=1.26619;DP=378;DP4=24,42,143,161;FS=0;MQ=37;MQ0F=0;MQBZ=-3.37834;MQSBZ=-0.796512;RPBZ=2.33911;SCBZ=0.527046;SGB=-0.692067;VDB=0.652478;SNP;TS	1/1:255,60,0:20:0:0,5:0,15:0,20	1/1:255,57,0:19:0:0,10:0,9:0,19	1/1:255,48,0:16:0:0,8:0,8:0,16	1/1:255,87,0:29:0:0,12:0,17:0,29	1/1:255,54,0:18:0:0,11:0,7:0,18	0/1:255,0,163:.:.:.:.:.	0/1:255,0,74:.:.:.:.:.	0/1:255,0,137:.:.:.:.:.	0/1:255,0,113:.:.:.:.:.	0/1:255,0,118:.:.:.:.:.	24	22	26	34	32	20	19	17	29	18	CACTIG010000023.1	47388386	47451105	NC_048332.1|2059944|2123721|1|XM_034924279.1|XP_034780170.1|disabled_homolog_1-like,_transcript_variant_X3|63778	0
[truncated: 6,897 more rows]
